# Supplementary material for: Synthesis of disubstituted γ-butyrolactones and spirocyclopropanes via a multicomponent reaction of aldehydes, Meldrum's acid and sulfoxonium ylides
Source: Royal Society of Chemistry journal article supplement (doi:10.1039/d1qo00303h), 2021-01-01

## Supporting Information

### **Synthesis of Disubstituted $\gamma$ -Butyrolactones and Spirocyclopropanes via Multicomponent Reaction of Aldehydes, Meldrum's Acid and Sulfoxonium Ylides**

Shan-Shan Li,<sup>a</sup> Qi Qin,<sup>a</sup> Li-Miao Yang,<sup>a</sup> Zhuang Qi,<sup>a</sup> Yun Kang,<sup>a</sup> Xiang-Zhi Zhang,<sup>a</sup> Ai-Jun Ma,<sup>\*,a</sup> and Jin-Bao Peng<sup>\*,a</sup>

- a. School of Biotechnology and Health Sciences, Wuyi University, Jiangmen, Guangdong 529020, People's Republic of China. E-mail: wyuchemmaj@126.com; pengjb\_05@126.com

## **Table of Contents**

- 1. General Information**
- 2. Optimization of Reaction Conditions**
- 3. General Procedure**
- 4. Spectroscopic Data of Products**
- 5. Structure Assignment of X-Ray Crystallographic Analysis**
- 6. References**
- 7. Copies of NMR Spectra for Compounds**

## 1. General Information

### Reagents, solvents and analytical methods:

Unless otherwise noted, all reactions were carried out under air atmosphere. Ethyl acetate, *N,N*-diisopropylethylamine, Meldrum's acid, *p*-anisaldehyde and pentanal were from commercial sources and used as received without further purification. Reactions were monitored by thin-layer chromatography (TLC) carried out on 0.20 mm silica gel plates using UV light as the visualizing agent, and Iodine and an acidic solution of Phosphomolybdic Acid (PMA) with heat as the stains. Column chromatography was performed on silica gel (200-300 meshes) using petroleum ether and ethyl acetate as eluent. All new compounds were characterized by means of <sup>1</sup>H NMR, <sup>13</sup>C NMR, <sup>19</sup>F NMR and HRMS. NMR spectra were recorded using a Bruker AVANCE NEO 500 MHz NMR spectrometer and can be found at the end of the paper. All <sup>1</sup>H NMR data are reported in  $\delta$  units, parts per million (ppm), and were calibrated relative to the signals for residual chloroform (7.26 ppm) in deuteriochloroform (CDCl<sub>3</sub>). All <sup>13</sup>C NMR data are reported in ppm relative to CDCl<sub>3</sub> (77.16 ppm) were obtained with <sup>1</sup>H decoupling. <sup>19</sup>F NMR was recorded on a Bruker AVANCE NEO 500 MHz NMR spectrometer. The following abbreviations or combinations thereof were used to explain the multiplicities: s = singlet, bs = broad singlet, d = doublet, t = triplet, q = quartet, m = multiplet. Single Crystal X-ray Diffraction (SCXRD). X-ray diffractions of all single crystals were carried out at 100(2) K on a Bruker D8 VENTURE diffractometer using Mo-K $\alpha$  radiation ( $\lambda = 0.71073 \text{ \AA}$ ). Integration and scaling of intensity data was performed using the SAINT program. Data were corrected for the effects of absorption using SADABS. The structures were solved by direct method and refined with full-matrix least-squares technique using SHELX-2014 software. Non-hydrogen atoms were refined with anisotropic displacement parameters, and hydrogen atoms were placed in calculated positions and refined with a riding model.

## 2. Optimization of Reaction Conditions

Table S1. Optimization of solvents.<sup>a</sup>

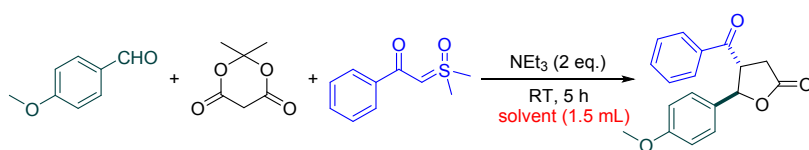

| Entry | Solvent                         | Yield (%) <sup>b</sup> |
|-------|---------------------------------|------------------------|
| 1     | CCl <sub>4</sub>                | 32                     |
| 2     | CH <sub>2</sub> Cl <sub>2</sub> | 73                     |
| 3     | EtOAc                           | 76                     |
| 4     | MeOH                            | 0                      |
| 5     | EtOH                            | 0                      |

<sup>a</sup>Standard conditions: *p*-Anisaldehyde **1a** (1.5 equiv), Meldrum's acid **2** (1.5 equiv), sulfoxonium ylide **3a** (0.2 mmol), NEt<sub>3</sub> (2 equiv), solvent (1.5 mL), RT, 5 h. <sup>b</sup>Isolated yield.

Table S2. Optimization of Ratio.<sup>a</sup>

| Entry | SM <sub>1</sub> :SM <sub>2</sub> :SM <sub>3</sub> | Yield (%) <sup>b</sup> |
|-------|---------------------------------------------------|------------------------|
| 1     | standard                                          | 76                     |

|   |           |    |
|---|-----------|----|
| 2 | 1.2:1.5:1 | 56 |
| 3 | 1.2:2:1   | 51 |
| 4 | 1.5:2:1   | 86 |

<sup>a</sup>Standard conditions: *p*-Anisaldehyde **1a**, Meldrum's acid **2**, sulfoxonium ylide **3a** (0.2 mmol), NEt<sub>3</sub> (2 equiv), ethyl acetate (1.5 mL), RT, 5 h. <sup>b</sup>Isolated yield.

Table S3. Optimization of Bases.<sup>a</sup>

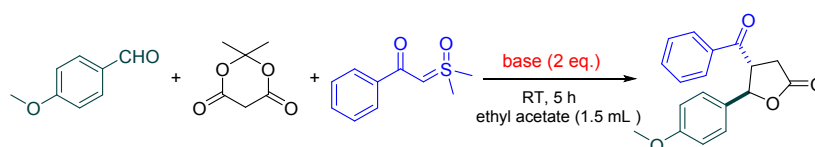

| Entry | Base                     | Yield (%) <sup>b</sup> |
|-------|--------------------------|------------------------|
| 1     | DMAP                     | 41                     |
| 2     | TNPA                     | 94                     |
| 3     | DMEDA                    | 54                     |
| 4     | DIPEA                    | 98(1 h)                |
| 5     | without NEt <sub>3</sub> | trace                  |

<sup>a</sup>Standard conditions: *p*-Anisaldehyde **1a** (1.5 equiv), Meldrum's acid **2** (2 equiv), sulfoxonium ylide **3a** (0.2 mmol), base (2 equiv), ethyl acetate (1.5 mL), RT, 5 h. <sup>b</sup>Isolated yield.

Table S4. Optimization of proportion of *N,N*-Diisopropylethylamine.<sup>a</sup>

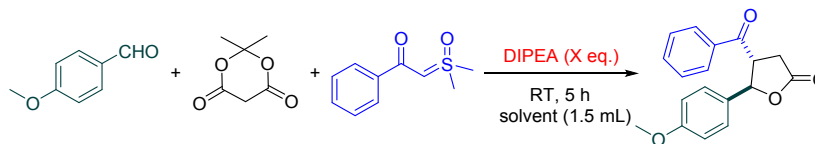

| Entry | <i>N,N</i> -Diisopropylethylamine | Yield (%) <sup>b</sup> | Time (h) |
|-------|-----------------------------------|------------------------|----------|
| 1     | 0.3 equiv                         | 82                     | >5       |
| 2     | 0.5 equiv                         | 98                     | 5        |
| 3     | 1.0 equiv                         | 97                     | 3        |
| 4     | 2.0 equiv                         | 98                     | 1        |

<sup>a</sup>Standard conditions: *p*-Anisaldehyde **1a** (1.5 equiv), Meldrum's acid **2** (2 equiv), sulfoxonium ylide **3a** (0.2 mmol), *N,N*-Diisopropylethylamine (2 equiv), ethyl acetate (1.5 mL), RT, 5 h. <sup>b</sup>Isolated yield.

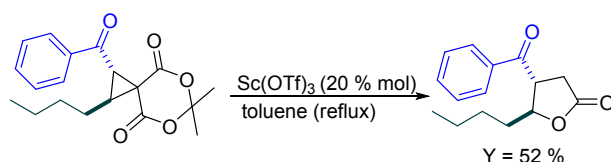

1-Benzoyl-2-butyl-6,6-dimethyl-5,7-dioxaspiro[2.5]octane-4,8-dione (0.2 mmol) and Sc(OTf)<sub>3</sub> (20 % mmol) were added in toluene (1 mL) and refluxed for 3 h. The solution was diluted with ethyl acetate (2 mL), washed with brine (1 mL, ×1) and concentrated in vacuo. The crude product was purified by column chromatography on silica gel to afford the corresponding product.

### 3. General Procedure

#### Aldehyde:

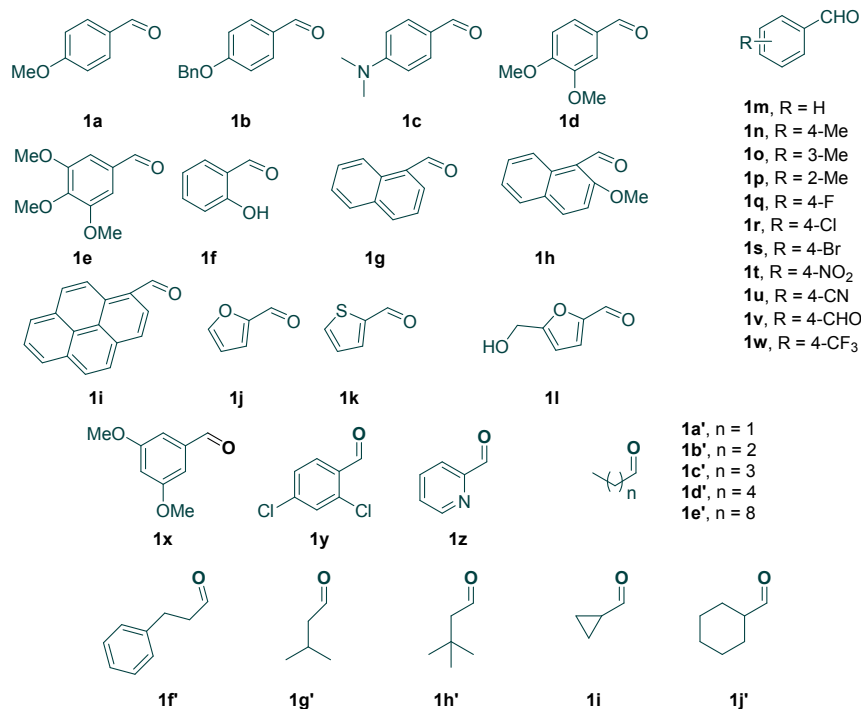

**Figure S1** Substrates of Aldehydes

#### Sulfoxonium ylides:

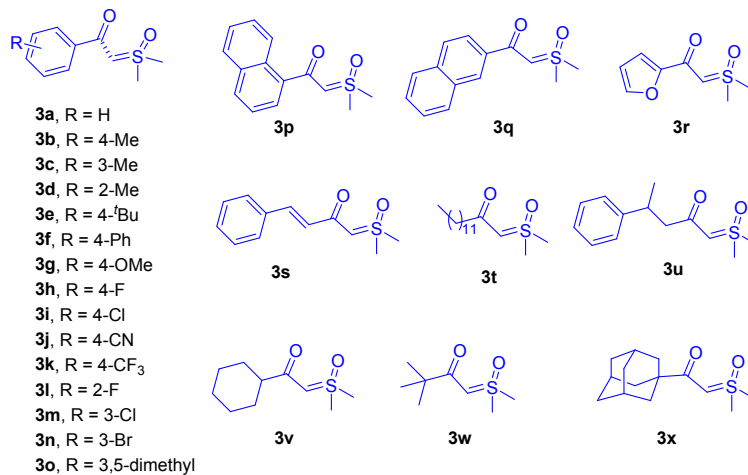

**Figure S2** Substrates of Sulfoxonium Ylides

Sulfoxonium ylides were prepared according to reported procedures.<sup>1</sup> In a 125 mL round bottom flask attached to a reflux condenser which was carried out under air atmosphere. *t*-BuOK (4.49 g, 40 mmol, 4.0 equiv) and 50.0 mL of THF was added. Then 6.6 g of trimethylsulfoxonium iodide (30 mmol, 3.0 equiv) was added in one portion. The suspension was heated at reflux and maintained for 2 h. Then the mixture was cooled to 0 °C followed by slow addition of acid chloride (10 mmol, 1.0 equiv). The reaction mixture was allowed to warm to room temperature and stirred for 3 h. Next, the solvent was diluted with ethyl acetate (50 mL) and washed with brine

(1 mL, ×3) then dried over Na<sub>2</sub>SO<sub>4</sub>. The crude material was concentrated in vacuo and purified by silica gel flash column chromatography.

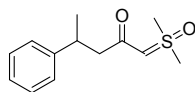

### 1-(dimethyl(oxo)-l6-sulfaneylidene)-4-phenylpentan-2-one (3u)

<sup>1</sup>H NMR (500 MHz, CDCl<sub>3</sub>) δ 7.33 – 7.26 (m, 4H), 7.23 (dq, *J* = 6.1, 2.8 Hz, 1H), 4.37 (s, 1H), 3.38 (s, 3H), 3.32 (s, 3H), 3.26 (t, *J* = 7.6 Hz, 1H), 2.11 (dt, *J* = 14.1, 7.3 Hz, 1H), 1.76 (dt, *J* = 13.7, 7.3 Hz, 1H), 0.89 (t, *J* = 7.4 Hz, 3H).

<sup>13</sup>C NMR (126 MHz, CDCl<sub>3</sub>) δ 191.1, 141.9, 128.3, 128.0, 126.4, 69.3, 58.5, 42.3, 42.1, 26.2, 12.6.

HRMS (ESI): *m/z* calcd for [C<sub>13</sub>H<sub>18</sub>O<sub>2</sub>S + Na]<sup>+</sup> 238.1037; found: 238.1069

## 4. General Procedure

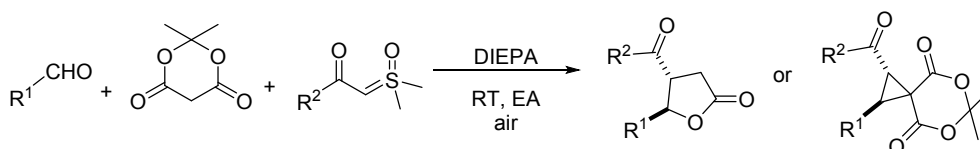

Aldhyde (0.3 mmol), Meldrum's acid (0.4 mmol) and sulfoxonium ylides (0.2 mmol) were added into an 15 mL tube which was carried out under air atmosphere. *N,N*-diisopropylethylamine (0.4 mmol) and ethyl acetate (1.5 mL) were added to the reaction tube. After a time period of 1 h, the solution was diluted with ethyl acetate (2 mL), washed with brine (1 mL, ×1) and concentrated in vacuo. The crude product was purified by column chromatography on silica gel to afford the corresponding product.

## 5. Spectroscopic Data of Products

### 5.1. Spectroscopic Data of Products 4aa-4au

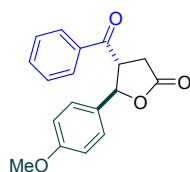

**trans-4-Benzoyl-5-(4-methoxyphenyl)dihydrofuran-2(3H)-one (4aa)** (Known compound: *Adv. Synth. Catal.* **2020**, *362*, 2385-2396)

The title compound was prepared from 4-methoxybenzaldehyde (0.3mmol), 2,2-dimethyl-1,3-dioxane-4,6-dione (0.4 mmol) and 2-(dimethyl(oxo)-λ<sup>6</sup>-sulfaneylidene)-1-phenylethan-1-one (0.2 mmol). The crude residue was purified by flash chromatography to give the product as a white solid. (98%, Mp. 188-191 °C).

<sup>1</sup>H NMR (500 MHz, CDCl<sub>3</sub>) δ 7.78 (d, *J* = 7.0 Hz, 2H), 7.59 (t, *J* = 7.4 Hz, 1H), 7.43 (t, *J* = 7.8 Hz, 2H), 7.25 (d, *J* = 10.0 Hz, 2H), 6.88 (d, *J* = 8.8 Hz, 2H), 5.73 (d, *J* = 7.6 Hz, 1H), 4.37 – 4.18 (m, 1H), 3.80 (s, 3H), 3.04 (qd, *J* = 17.6, 9.4 Hz, 2H).

$^{13}\text{C}$  NMR (126 MHz,  $\text{CDCl}_3$ )  $\delta$  196.9, 174.5, 160.3, 135.6, 134.4, 130.3, 129.2, 128.9, 127.4, 114.5, 82.8, 55.6, 51.3, 34.0.

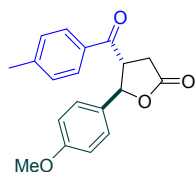

***trans*-5-(4-Methoxyphenyl)-4-(4-methylbenzoyl)dihydrofuran-2(3H)-one (4ab)**

The title compound was prepared from 4-methoxybenzaldehyde (0.3mmol), 2,2-dimethyl-1,3-dioxane-4,6-dione (0.4 mmol) and 2-(dimethyl(oxo)- $\lambda^6$ -sulfaneylidene)-1-(*p*-tolyl)ethan-1-one (0.2 mmol). The crude residue was purified by flash chromatography to give the product as a white solid. (59%, Mp. 117-121°C).

$^1\text{H}$  NMR (500 MHz,  $\text{CDCl}_3$ )  $\delta$  7.72 (d,  $J$  = 8.3 Hz, 2H), 7.29 (dd,  $J$  = 12.0, 3.4 Hz, 4H), 6.92 (d,  $J$  = 8.7 Hz, 2H), 5.76 (d,  $J$  = 7.6 Hz, 1H), 4.30 (td,  $J$  = 9.3, 7.5 Hz, 1H), 3.84 (s, 3H), 3.16 – 2.97 (m, 2H), 2.44 (s, 3H).

$^{13}\text{C}$  NMR (126 MHz,  $\text{CDCl}_3$ )  $\delta$  174.6, 160.2, 145.6, 133.1, 130.3, 129.9, 129.0, 127.4, 114.5, 82.8, 55.6, 51.1, 34.0, 21.9.

HRMS (ESI):  $m/z$  calcd for  $[\text{C}_{19}\text{H}_{18}\text{O}_4 + \text{Na}]^+$  333.1097; found: 333.1097

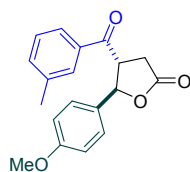

***trans*-5-(4-Methoxyphenyl)-4-(3-methylbenzoyl)dihydrofuran-2(3H)-one (4ac)**

The title compound was prepared from 4-methoxybenzaldehyde (0.3mmol), 2,2-dimethyl-1,3-dioxane-4,6-dione (0.4 mmol) and 2-(dimethyl(oxo)- $\lambda^6$ -sulfaneylidene)-1-(*m*-tolyl)ethan-1-one (0.2 mmol). The crude residue was purified by flash chromatography to give the product. (93%).

$^1\text{H}$  NMR (500 MHz,  $\text{CDCl}_3$ )  $\delta$  7.56 (d,  $J$  = 7.4 Hz, 2H), 7.38 (d,  $J$  = 7.1 Hz, 1H), 7.30 (t,  $J$  = 8.0 Hz, 1H), 7.24 (d,  $J$  = 8.7 Hz, 2H), 6.88 (d,  $J$  = 8.7 Hz, 2H), 5.69 (d,  $J$  = 7.7 Hz, 1H), 4.32 – 4.24 (m, 1H), 3.79 (s, 3H), 3.10 – 2.95 (m, 2H), 2.33 (s, 3H).

$^{13}\text{C}$  NMR (126 MHz,  $\text{CDCl}_3$ )  $\delta$  196.9, 174.5, 160.2, 139.0, 135.5, 135.1, 130.3, 129.4, 129.0, 127.5, 126.0, 114.4, 82.8, 55.5, 51.4, 33.9, 21.5.

HRMS (ESI):  $m/z$  calcd for  $[\text{C}_{22}\text{H}_{20}\text{O}_5 + \text{Na}]^+$  333.1097; found: 333.1095

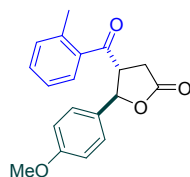

***trans*-5-(4-Methoxyphenyl)-4-(2-methylbenzoyl)dihydrofuran-2(3H)-one (4ad)**

The title compound was prepared from 4-methoxybenzaldehyde (0.3mmol), 2,2-dimethyl-1,3-dioxane-4,6-dione (0.4 mmol) and 2-(dimethyl(oxo)- $\lambda^6$ -sulfaneylidene)-1-(*o*-tolyl)ethan-1-one

(0.2 mmol). The crude residue was purified by flash chromatography to give the product. (62%).  
**<sup>1</sup>H NMR (500 MHz, CDCl<sub>3</sub>)** δ 7.38 (t, J = 6.9 Hz, 1H), 7.31 (d, J = 6.5 Hz, 1H), 7.26 (d, J = 7.6 Hz, 1H), 7.21 (d, J = 8.7 Hz, 2H), 7.17 (t, J = 7.6 Hz, 1H), 6.87 (d, J = 8.7 Hz, 2H), 5.67 (d, J = 7.5 Hz, 1H), 4.25 – 4.15 (m, 1H), 3.79 (s, 3H), 3.07 – 2.87 (m, 2H), 2.50 (s, 3H).  
**<sup>13</sup>C NMR (126 MHz, CDCl<sub>3</sub>)** δ 199.8, 174.4, 160.0, 139.5, 135.8, 132.5, 132.4, 130.1, 128.8, 127.1, 126.0, 114.3, 82.7, 55.4, 53.5, 33.6, 21.6.  
**HRMS (ESI):** *m/z* calcd for [C<sub>19</sub>H<sub>18</sub>O<sub>4</sub> + Na]<sup>+</sup> 333.1097; found: 333.1090

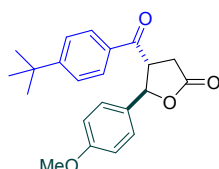

***trans*-4-(4-(Tert-butyl)benzoyl)-5-(4-methoxyphenyl)dihydrofuran-2(3H)-one (4ae)**

The title compound was prepared from 4-methoxybenzaldehyde (0.3mmol), 2,2-dimethyl-1,3-dioxane-4,6-dione (0.4 mmol) and 1-(4-(tert-butyl)phenyl)-2-(dimethyl(oxo)-λ<sup>6</sup>-sulfaneylidene)ethan-1-one (0.2 mmol). The crude residue was purified by flash chromatography to give the product. (90%).

**<sup>1</sup>H NMR (500 MHz, CDCl<sub>3</sub>)** δ 7.76 (d, J = 8.2 Hz, 2H), 7.46 (d, J = 8.2 Hz, 2H), 7.27 (d, J = 8.6 Hz, 2H), 6.89 (d, J = 8.4 Hz, 2H), 5.76 (d, J = 7.5 Hz, 1H), 4.31 (q, J = 9.3 Hz, 1H), 3.80 (s, 3H), 3.03 (d, J = 9.3 Hz, 2H), 1.33 (s, 9H).  
**<sup>13</sup>C NMR (126 MHz, CDCl<sub>3</sub>)** δ 196.4, 174.6, 160.1, 158.3, 132.9, 130.3, 128.8, 127.4, 126.1, 114.4, 82.7, 55.5, 51.0, 35.4, 34.0, 31.1.  
**HRMS (ESI):** *m/z* calcd for [C<sub>22</sub>H<sub>24</sub>O<sub>4</sub> + Na]<sup>+</sup> 375.1567; found: 375.1565

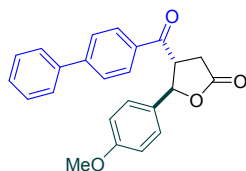

***trans*-4-([1,1'-Biphenyl]-4-carbonyl)-5-(4-methoxyphenyl)dihydrofuran-2(3H)-one (4af)**

The title compound was prepared from 4-methoxybenzaldehyde (0.3mmol), 2,2-dimethyl-1,3-dioxane-4,6-dione (0.4 mmol) and 1-([1,1'-biphenyl]-4-yl)-2-(dimethyl(oxo)-λ<sup>6</sup>-sulfaneylidene)ethan-1-one (0.2 mmol). The crude residue was purified by flash chromatography to give the product. (72%).

**<sup>1</sup>H NMR (500 MHz, CDCl<sub>3</sub>)** δ 7.85 (d, J = 8.5 Hz, 2H), 7.65 (d, J = 8.4 Hz, 2H), 7.60 (d, J = 7.0 Hz, 2H), 7.47 (t, J = 7.4 Hz, 2H), 7.41 (t, J = 7.3 Hz, 1H), 7.26 (s, 8H), 6.90 (d, J = 8.7 Hz, 2H), 5.75 (d, J = 7.7 Hz, 1H), 4.38 – 4.25 (m, 1H), 3.80 (s, 3H), 3.17 – 2.98 (m, 2H).  
**<sup>13</sup>C NMR (126 MHz, CDCl<sub>3</sub>)** δ 196.2, 174.3, 160.1, 146.9, 139.3, 134.0, 130.1, 129.3, 129.1, 128.6, 127.5, 127.3, 127.2, 114.3, 82.6, 55.4, 51.2, 33.8.  
**HRMS (ESI):** *m/z* calcd for [C<sub>24</sub>H<sub>20</sub>O<sub>4</sub> + Na]<sup>+</sup> 395.1254; found: 395.1257



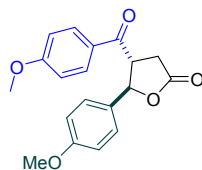

***trans*-4-(4-Methoxybenzoyl)-5-(4-methoxyphenyl)dihydrofuran-2(3H)-one (4ag)**

The title compound was prepared from 4-methoxybenzaldehyde (0.3mmol), 2,2-dimethyl-1,3-dioxane-4,6-dione (0.4 mmol) and 2-(dimethyl(oxo)- $\lambda^6$ -sulfaneylidene)-1-(4-methoxyphenyl) ethan-1-one (0.2 mmol). The crude residue was purified by flash chromatography to give the product. (82%).

**<sup>1</sup>H NMR (500 MHz, CDCl<sub>3</sub>)**  $\delta$  7.74 (d, J = 8.9 Hz, 2H), 7.23 (d, J = 8.7 Hz, 2H), 6.87 (dd, J = 8.9, 2.7 Hz, 4H), 5.68 (d, J = 7.7 Hz, 1H), 4.29 – 4.19 (m, 1H), 3.84 (s, 3H), 3.78 (s, 3H), 3.12 – 2.90 (m, 2H).

**<sup>13</sup>C NMR (126 MHz, CDCl<sub>3</sub>)**  $\delta$  195.1, 174.7, 164.5, 160.2, 131.2, 130.3, 128.5, 127.4, 114.4, 114.3, 83.0, 55.8, 55.5, 50.9, 34.0.

**HRMS (ESI):** m/z calcd for [C<sub>19</sub>H<sub>18</sub>O<sub>5</sub> + Na]<sup>+</sup> 349.1046; found: 349.1046

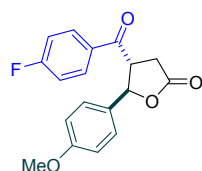

***trans*-4-(4-Fluorobenzoyl)-5-(4-methoxyphenyl)dihydrofuran-2(3H)-one (4ah)**

The title compound was prepared from 4-methoxybenzaldehyde (0.3mmol), 2,2-dimethyl-1,3-dioxane-4,6-dione (0.4 mmol) and 2-(dimethyl(oxo)- $\lambda^6$ -sulfaneylidene)-1-(4-fluorophenyl) ethan-1-one (0.2 mmol). The crude residue was purified by flash chromatography to give the product. (85%).

**<sup>1</sup>H NMR (500 MHz, CDCl<sub>3</sub>)**  $\delta$  7.79 (dd, J = 8.7, 5.4 Hz, 2H), 7.23 (d, J = 8.6 Hz, 2H), 7.09 (t, J = 8.5 Hz, 2H), 6.89 (d, J = 8.7 Hz, 2H), 5.67 (d, J = 7.7 Hz, 1H), 4.28 – 4.20 (m, 1H), 3.82 (s, 3H), 3.14 – 2.93 (m, 2H).

**<sup>13</sup>C NMR (126 MHz, CDCl<sub>3</sub>)**  $\delta$  195.2, 174.3, 166.5 (d, J = 257.4 Hz), 160.4, 131.6 (d, J = 9.6 Hz), 130.1, 127.4, 116.5, 116.3, 114.6, 82.8, 55.6, 51.4, 33.9.

**<sup>19</sup>F NMR (471 MHz, Chloroform-d)**  $\delta$  -102.65.

**HRMS (ESI):** m/z calcd for [C<sub>18</sub>H<sub>15</sub>FO<sub>4</sub> + Na]<sup>+</sup> 337.0847; found: 337.0849

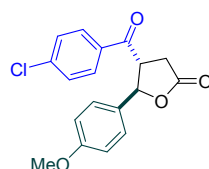

***trans*-4-(4-Chlorobenzoyl)-5-(4-methoxyphenyl)dihydrofuran-2(3H)-one (4ai)**

The title compound was prepared from 4-methoxybenzaldehyde (0.3mmol), 2,2-dimethyl-1,3-

dioxane-4,6-dione (0.4 mmol) and 1-(4-chlorophenyl)-2-(dimethyl(oxo)- $\lambda^6$ -sulfaneylidene)ethan-1-one (0.2 mmol). The crude residue was purified by flash chromatography to give the product. (72%).

**$^1\text{H NMR}$  (500 MHz,  $\text{CDCl}_3$ )**  $\delta$  7.69 (d,  $J = 8.7$  Hz, 2H), 7.39 (d,  $J = 8.6$  Hz, 2H), 7.23 (d,  $J = 8.7$  Hz, 2H), 6.88 (d,  $J = 8.7$  Hz, 2H), 5.65 (d,  $J = 7.7$  Hz, 1H), 4.29 – 4.18 (m, 1H), 3.80 (s, 3H), 3.14 – 2.93 (m, 2H).

**$^{13}\text{C NMR}$  (126 MHz,  $\text{CDCl}_3$ )**  $\delta$  195.7, 174.3, 160.4, 141.1, 133.9, 130.2, 130.0, 129.5, 127.4, 114.6, 82.8, 55.6, 51.4, 33.8.

**HRMS** (ESI):  $m/z$  calcd for  $[\text{C}_{18}\text{H}_{15}\text{ClO}_4 + \text{Na}]^+$  353.0551; found: 353.0558

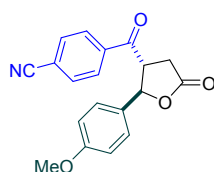

#### 4-(*trans*-2-(4-Methoxyphenyl)-5-oxotetrahydrofuran-3-carbonyl)benzonitrile (4aj)

The title compound was prepared from 4-methoxybenzaldehyde (0.3mmol), 2,2-dimethyl-1,3-dioxane-4,6-dione (0.4 mmol) and 4-(2-(dimethyl(oxo)- $\lambda^6$ -sulfaneylidene)acetyl)benzonitrile (0.2 mmol). The crude residue was purified by flash chromatography to give the product. (76%).

**$^1\text{H NMR}$  (500 MHz,  $\text{CDCl}_3$ )**  $\delta$  7.82 (d,  $J = 8.4$  Hz, 2H), 7.71 (d,  $J = 8.4$  Hz, 2H), 7.22 (d,  $J = 8.7$  Hz, 2H), 6.88 (d,  $J = 8.7$  Hz, 2H), 5.62 (d,  $J = 7.7$  Hz, 1H), 4.33 – 4.22 (m, 1H), 3.80 (s, 3H), 3.15 – 2.94 (m, 2H).

**$^{13}\text{C NMR}$  (126 MHz,  $\text{CDCl}_3$ )**  $\delta$  195.8, 173.9, 160.5, 138.4, 132.9, 129.6, 129.2, 127.5, 117.7, 117.6, 114.7, 82.6, 55.6, 51.8, 33.6.

**HRMS** (ESI):  $m/z$  calcd for  $[\text{C}_{19}\text{H}_{15}\text{NO}_4 + \text{Na}]^+$  344.0893; found: 344.0895

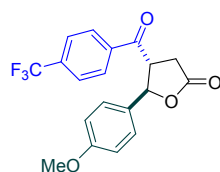

#### *trans*-5-(4-Methoxyphenyl)-4-(4-(trifluoromethyl)benzoyl)dihydrofuran-2(3H)-one (4ak)

The title compound was prepared from 4-methoxybenzaldehyde (0.3mmol), 2,2-dimethyl-1,3-dioxane-4,6-dione (0.4 mmol) and 2-(dimethyl(oxo)- $\lambda^6$ -sulfaneylidene)-1-(4-(trifluoromethyl)phenyl)ethan-1-one (0.2 mmol). The crude residue was purified by flash chromatography to give the product. (61%).

**$^1\text{H NMR}$  (500 MHz,  $\text{CDCl}_3$ )**  $\delta$  7.86 (d,  $J = 8.1$  Hz, 2H), 7.68 (d,  $J = 8.3$  Hz, 2H), 7.23 (d,  $J = 8.7$  Hz, 2H), 6.88 (d,  $J = 8.7$  Hz, 2H), 5.66 (d,  $J = 7.7$  Hz, 1H), 4.35 – 4.24 (m, 1H), 3.80 (s, 3H), 3.13 – 2.97 (m, 2H).

**$^{13}\text{C NMR}$  (126 MHz,  $\text{CDCl}_3$ )**  $\delta$  196.1, 174.1, 160.4, 138.2, 135.5 (q,  $J = 32.9$  Hz), 129.8, 129.2, 127.5, 126.2, 123.5 (q,  $J = 273.0$  Hz), 114.6, 82.6, 55.6, 51.7, 33.7.

**$^{19}\text{F NMR}$  (471 MHz, Chloroform-*d*)**  $\delta$  -63.24.

**HRMS** (ESI):  $m/z$  calcd for  $[\text{C}_{19}\text{H}_{15}\text{F}_3\text{O}_4 + \text{Na}]^+$  387.0815; found: 387.0813

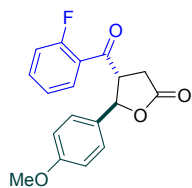

***trans*-4-(2-Fluorobenzoyl)-5-(4-methoxyphenyl)dihydrofuran-2(3H)-one (4al)**

The title compound was prepared from 4-methoxybenzaldehyde (0.3mmol), 2,2-dimethyl-1,3-dioxane-4,6-dione (0.4 mmol) and 2-(dimethyl(oxo)- $\lambda^6$ -sulfaneylidene)-1-(2-fluorophenyl) ethan-1-one (0.2 mmol). The crude residue was purified by flash chromatography to give the product. (83%).

**$^1\text{H}$  NMR (500 MHz,  $\text{CDCl}_3$ )**  $\delta$  7.87 (td,  $J = 7.6, 1.9$  Hz, 1H), 7.64 – 7.56 (m, 1H), 7.29 (d,  $J = 8.2$  Hz, 3H), 7.14 (dd,  $J = 11.5, 8.3$  Hz, 1H), 6.91 (d,  $J = 8.7$  Hz, 2H), 5.89 (d,  $J = 7.0$  Hz, 1H), 4.24 (q,  $J = 8.3, 7.7$  Hz, 1H), 3.82 (s, 3H), 3.12 (dd,  $J = 17.5, 9.1$  Hz, 1H), 2.93 (dd,  $J = 17.6, 8.9$  Hz, 1H).

**$^{13}\text{C}$  NMR (126 MHz,  $\text{CDCl}_3$ )**  $\delta$  195.2, 174.9 (d,  $J = 176.4$  Hz), 161.7 (d,  $J = 254.6$  Hz), 159.9, 135.9 (d,  $J = 9.6$  Hz), 131.2 (d,  $J = 2.3$  Hz), 130.1, 127.2, 125.0 (d,  $J = 3.3$  Hz), 124.2, 116.9 (d,  $J = 23.9$  Hz), 114.2, 81.8, 55.3, 55.2 (d,  $J = 7.3$  Hz), 32.9.

**$^{19}\text{F}$  NMR (471 MHz, Chloroform-*d*)**  $\delta$  -110.48.

**HRMS (ESI):**  $m/z$  calcd for  $[\text{C}_{18}\text{H}_{15}\text{FO}_4 + \text{Na}]^+$  337.0847; found: 337.0845

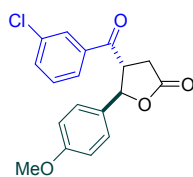

***trans*-4-(3-Chlorobenzoyl)-5-(4-methoxyphenyl)dihydrofuran-2(3H)-one (4am)**

The title compound was prepared from 4-methoxybenzaldehyde (0.3mmol), 2,2-dimethyl-1,3-dioxane-4,6-dione (0.4 mmol) and 1-(3-chlorophenyl)-2-(dimethyl(oxo)- $\lambda^6$ -sulfaneylidene) ethan-1-one (0.2 mmol). The crude residue was purified by flash chromatography to give the product as a yellow solid. (56%, Mp. 135-140 °C).

**$^1\text{H}$  NMR (500 MHz,  $\text{CDCl}_3$ )**  $\delta$  7.70 (s, 1H), 7.61 (d,  $J = 7.7$  Hz, 1H), 7.54 (d,  $J = 8.0$  Hz, 1H), 7.36 (t,  $J = 7.9$  Hz, 1H), 7.23 (d,  $J = 8.8$  Hz, 2H), 6.88 (d,  $J = 8.7$  Hz, 2H), 5.65 (d,  $J = 7.7$  Hz, 1H), 4.23 (td,  $J = 9.4, 7.7$  Hz, 1H), 3.79 (s, 3H), 3.14 – 2.93 (m, 2H).

**$^{13}\text{C}$  NMR (126 MHz,  $\text{CDCl}_3$ )**  $\delta$  195.5, 174.0, 160.2, 136.8, 135.4, 134.1, 130.3, 129.7, 128.8, 127.3, 126.7, 114.4, 82.5, 55.4, 51.5, 33.5.

**HRMS (ESI):**  $m/z$  calcd for  $[\text{C}_{18}\text{H}_{15}\text{ClO}_4 + \text{Na}]^+$  353.0551; found: 353.0553

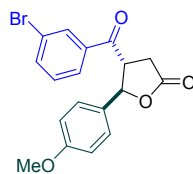

***trans*-4-(3-Bromobenzoyl)-5-(4-methoxyphenyl)dihydrofuran-2(3H)-one (4an)**

The title compound was prepared from 4-methoxybenzaldehyde (0.3mmol), 2,2-dimethyl-1,3-dioxane-4,6-dione (0.4 mmol) and 1-(3-bromophenyl)-2-(dimethyl(oxo)- $\lambda^6$ -sulfaneylidene)

ethan-1-one (0.2 mmol). The crude residue was purified by flash chromatography to give the product. (90%).

**<sup>1</sup>H NMR (500 MHz, CDCl<sub>3</sub>)** δ 7.83 (s, 1H), 7.67 (dd, J = 13.9, 7.9 Hz, 2H), 7.29 (t, J = 7.9 Hz, 1H), 7.23 (d, J = 8.7 Hz, 2H), 6.89 (d, J = 8.7 Hz, 2H), 5.63 (d, J = 7.8 Hz, 1H), 4.27 – 4.17 (m, 1H), 3.80 (s, 3H), 3.15 – 2.92 (m, 2H).

**<sup>13</sup>C NMR (126 MHz, CDCl<sub>3</sub>)** δ 195.4, 174.0, 160.2, 137.0, 137.0, 131.8, 130.5, 129.7, 127.3, 127.1, 123.3, 114.4, 82.5, 55.4, 51.5, 33.5.

**HRMS (ESI):** m/z calcd for [C<sub>18</sub>H<sub>15</sub>BrO<sub>4</sub> + Na]<sup>+</sup> 399.0025; found: 399.0026

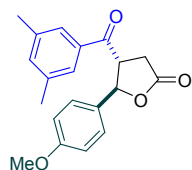

***trans*-4-(3,5-Dimethylbenzoyl)-5-(4-methoxyphenyl)dihydrofuran-2(3H)-one (4ao)**

The title compound was prepared from 4-methoxybenzaldehyde (0.3mmol), 2,2-dimethyl-1,3-dioxane-4,6-dione (0.4 mmol) and 2-(dimethyl(oxo)-λ<sup>6</sup>-sulfaneylidene)-1-(3,5-dimethylphenyl)ethan-1-one (0.2 mmol). The crude residue was purified by flash chromatography to give the product. (65%).

**<sup>1</sup>H NMR (500 MHz, CDCl<sub>3</sub>)** δ 7.34 (s, 2H), 7.24 (d, J = 8.7 Hz, 2H), 7.20 (s, 1H), 6.87 (d, J = 8.6 Hz, 2H), 5.66 (d, J = 7.8 Hz, 1H), 4.31 – 4.21 (m, 1H), 3.79 (s, 3H), 3.12 – 2.92 (m, 2H), 2.28 (s, 6H).

**<sup>13</sup>C NMR (126 MHz, CDCl<sub>3</sub>)** δ 197.0, 174.6, 160.2, 138.8, 136.0, 135.6, 130.3, 127.5, 126.7, 114.4, 82.8, 55.5, 51.5, 33.8, 21.3.

**HRMS (ESI):** m/z calcd for [C<sub>20</sub>H<sub>20</sub>O<sub>4</sub> + Na]<sup>+</sup> 347.1254; found: 347.1256

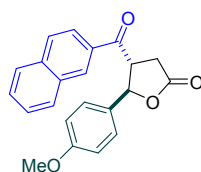

***trans*-4-(2-Naphthoyl)-5-(4-methoxyphenyl)dihydrofuran-2(3H)-one (4aq)**

The title compound was prepared from 4-methoxybenzaldehyde (0.3mmol), 2,2-dimethyl-1,3-dioxane-4,6-dione (0.4 mmol) and 2-(dimethyl(oxo)-λ<sup>6</sup>-sulfaneylidene)-1-(naphthalen-2-yl)ethan-1-one (0.2 mmol). The crude residue was purified by flash chromatography to give the product. (33%).

**<sup>1</sup>H NMR (500 MHz, CDCl<sub>3</sub>)** δ 8.12 (s, 1H), 7.95 (d, J = 8.3 Hz, 1H), 7.92 – 7.87 (m, 2H), 7.80 (d, J = 8.2 Hz, 1H), 7.68 – 7.62 (m, 1H), 7.56 (d, J = 6.9 Hz, 1H), 7.30 (d, J = 8.7 Hz, 2H), 6.91 (s, 2H), 5.75 (d, J = 7.8 Hz, 1H), 4.47 (q, J = 9.0 Hz, 1H), 3.80 (d, J = 10.5 Hz, 3H), 3.28 – 3.07 (m, 2H).

**<sup>13</sup>C NMR (126 MHz, CDCl<sub>3</sub>)** δ 196.4, 174.4, 160.1, 135.9, 132.7, 132.3, 131.1, 130.1, 129.7, 129.3, 128.9, 127.8, 127.3, 127.2, 123.8, 114.4, 82.8, 55.4, 51.4, 33.7.

**HRMS (ESI):** m/z calcd for [C<sub>22</sub>H<sub>18</sub>O<sub>4</sub> + Na]<sup>+</sup> 369.1097; found: 369.1104

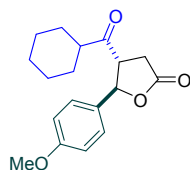

***trans*-4-(Cyclohexanecarbonyl)-5-(4-methoxyphenyl)dihydrofuran-2(3H)-one (4av)**

The title compound was prepared from 4-methoxybenzaldehyde (0.3mmol), 2,2-dimethyl-1,3-dioxane-4,6-dione (0.4 mmol) and 1-dicyclohexyl-2-(dimethyl(oxo)- $\lambda^6$ -sulfaneylidene)ethan-1-one (0.2 mmol). The crude residue was purified by flash chromatography to give the product. (41%).  
 $^1\text{H NMR}$  (500 MHz,  $\text{CDCl}_3$ )  $\delta$  7.22 (d,  $J = 8.7$  Hz, 2H), 6.89 (d,  $J = 8.7$  Hz, 2H), 5.47 (d,  $J = 8.4$  Hz, 1H), 3.80 (s, 3H), 3.69 – 3.60 (m, 1H), 2.83 (d,  $J = 9.6$  Hz, 2H), 2.20 (tt,  $J = 10.9, 3.2$  Hz, 1H), 1.76 – 1.56 (m, 5H), 1.14 (s, 5H).

$^{13}\text{C NMR}$  (126 MHz,  $\text{CDCl}_3$ )  $\delta$  210.6, 174.3, 160.2, 129.9, 127.4, 114.4, 82.8, 55.4, 53.8, 51.3, 33.7, 28.0, 27.6, 25.6, 25.4, 25.3.

**HRMS** (ESI):  $m/z$  calcd for  $[\text{C}_{18}\text{H}_{22}\text{O}_4 + \text{Na}]^+$  325.1410; found: 325.1411

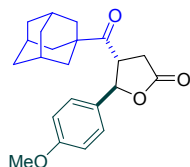

***trans*-4-(Adamantane-1-carbonyl)-5-(4-methoxyphenyl)dihydrofuran-2(3H)-one (4ax)**

The title compound was prepared from 4-methoxybenzaldehyde (0.3mmol), 2,2-dimethyl-1,3-dioxane-4,6-dione (0.4 mmol) and 1-(adamantan-1-yl)-2-(dimethyl(oxo)- $\lambda^6$ - sulfaneylidene)ethan-1-one (0.2 mmol). The crude residue was purified by flash chromatography to give the product. (46%).

$^1\text{H NMR}$  (500 MHz,  $\text{CDCl}_3$ )  $\delta$  7.19 (d,  $J = 8.7$  Hz, 2H), 6.89 (d,  $J = 8.7$  Hz, 2H), 5.56 (d,  $J = 8.7$  Hz, 1H), 3.81 (s, 4H), 2.85 – 2.65 (m, 2H), 1.98 (s, 3H), 1.70 (d,  $J = 12.6$  Hz, 3H), 1.58 (d,  $J = 9.8$  Hz, 9H).

$^{13}\text{C NMR}$  (126 MHz,  $\text{CDCl}_3$ )  $\delta$  212.8, 174.3, 160.3, 129.9, 127.4, 114.4, 83.9, 55.6, 50.1, 47.0, 37.3, 36.4, 36.1, 27.7.

**HRMS** (ESI):  $m/z$  calcd for  $[\text{C}_{18}\text{H}_{22}\text{O}_4 + \text{Na}]^+$  377.1723; found: 377.1726

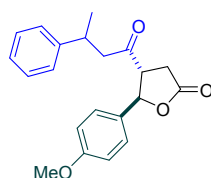

***trans*-5-(4-Methoxyphenyl)-4-(3-phenylbutanoyl)dihydrofuran-2(3H)-one (4au)**

The title compound was prepared from 4-methoxybenzaldehyde (0.3mmol), 2,2-dimethyl-1,3-dioxane-4,6-dione (0.4 mmol) and 1-(dimethyl(oxo)- $\lambda^6$ -sulfaneylidene)-4-phenylpentan-2-one (0.2 mmol). The crude residue was purified by flash chromatography to give the product. (76%).

**4au-1**

**<sup>1</sup>H NMR (500 MHz, CDCl<sub>3</sub>)** δ 7.34 – 7.24 (m, 3H), 7.21 (d, J = 8.7 Hz, 2H), 7.01 – 6.91 (m, 4H), 5.35 (d, J = 8.9 Hz, 1H), 3.85 (s, 3H), 3.48 (dt, J = 10.8, 8.6 Hz, 1H), 3.18 (t, J = 7.3 Hz, 1H), 2.79 (dd, J = 17.6, 10.8 Hz, 1H), 2.25 (dd, J = 17.5, 8.4 Hz, 1H), 2.02 (dp, J = 14.4, 7.2 Hz, 1H), 1.68 – 1.59 (m, 1H), 0.74 (t, J = 7.4 Hz, 3H).

**<sup>13</sup>C NMR (126 MHz, CDCl<sub>3</sub>)** δ 206.8, 174.4, 160.5, 137.1, 129.7, 129.5, 128.7, 128.1, 127.7, 114.6, 83.2, 62.2, 55.6, 55.2, 34.0, 24.8, 12.2.

**HRMS (ESI):** m/z calcd for [C<sub>21</sub>H<sub>22</sub>O<sub>4</sub> + Na]<sup>+</sup> 361.1410; found: 361.1409

#### 4au-2

**<sup>1</sup>H NMR (500 MHz, CDCl<sub>3</sub>)** δ 7.20 (dd, J = 4.9, 1.8 Hz, 3H), 7.03 – 6.94 (m, 2H), 6.85 (d, J = 8.8 Hz, 2H), 6.70 (d, J = 8.7 Hz, 2H), 5.48 (d, J = 7.8 Hz, 1H), 3.77 (s, 3H), 3.55 – 3.39 (m, 2H), 2.84 – 2.60 (m, 2H), 1.98 (dp, J = 14.5, 7.3 Hz, 1H), 1.72 – 1.59 (m, 1H), 0.77 (t, J = 7.4 Hz, 3H).

**<sup>13</sup>C NMR (126 MHz, CDCl<sub>3</sub>)** δ 207.4, 174.0, 160.0, 136.5, 129.4, 129.3, 128.6, 127.9, 127.2, 114.2, 82.4, 61.5, 55.5, 53.7, 33.9, 24.8, 12.1.

**HRMS (ESI):** m/z calcd for [C<sub>21</sub>H<sub>22</sub>O<sub>4</sub> + Na]<sup>+</sup> 361.1410; found: 361.1410

## 5.2. Spectroscopic Data of Products 4ba-4la

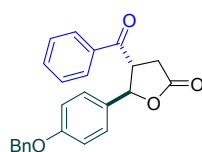

#### *trans*-4-Benzoyl-5-(4-(benzyloxy)phenyl)dihydrofuran-2(3H)-one (4ba)

The title compound was prepared from 4-(benzyloxy)benzaldehyde (0.3mmol), 2,2-dimethyl -1,3-dioxane-4,6-dione (0.4 mmol) and 2-(dimethyl(oxo)-λ<sup>6</sup>-sulfaneylidene)-1-phenylethan-1-one (0.2 mmol). The crude residue was purified by flash chromatography to give the product. (93%).

**<sup>1</sup>H NMR (500 MHz, CDCl<sub>3</sub>)** δ 7.79 (d, J = 7.9 Hz, 2H), 7.61 – 7.56 (m, 1H), 7.46 – 7.33 (m, 7H), 7.25 (d, J = 8.4 Hz, 2H), 6.96 (d, J = 8.7 Hz, 2H), 5.72 (d, J = 7.5 Hz, 1H), 5.05 (s, 2H), 4.34 – 4.25 (m, 1H), 3.03 (h, J = 8.9, 8.4 Hz, 2H).

**<sup>13</sup>C NMR (126 MHz, CDCl<sub>3</sub>)** δ 196.8, 174.4, 159.3, 136.7, 135.4, 134.4, 130.5, 129.1, 128.8, 128.3, 127.6, 127.4, 115.4, 82.6, 70.2, 51.2, 33.8.

**HRMS (ESI):** m/z calcd for [C<sub>24</sub>H<sub>20</sub>O<sub>4</sub> + Na]<sup>+</sup> 395.1254; found: 395.1256

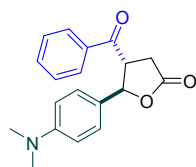

#### *trans*-4-Benzoyl-5-(4-(dimethylamino)phenyl)dihydrofuran-2(3H)-one (4ca) (Known compound: *Adv. Synth. Catal.* **2020**, 362, 2385-2396)

The title compound was prepared from 4-(benzyloxy)benzaldehyde (0.3mmol), 2,2-dimethyl -1,3-dioxane-4,6-dione (0.4 mmol) and 2-(dimethyl(oxo)-λ<sup>6</sup>-sulfaneylidene)-1-phenylethan-1-one (0.2 mmol). The crude residue was purified by flash chromatography to give the product. (52%).

**<sup>1</sup>H NMR (500 MHz, CDCl<sub>3</sub>)** δ 7.79 (d, J = 6.8 Hz, 2H), 7.58 (t, J = 7.4 Hz, 1H), 7.43 (d, J = 7.8 Hz, 2H), 7.19 (d, J = 8.7 Hz, 2H), 6.69 (d, J = 8.3 Hz, 2H), 5.67 (d, J = 7.3 Hz, 1H), 4.37 – 4.28 (m, 1H), 3.12 – 2.97 (m, 2H), 2.95 (s, 6H).

**<sup>13</sup>C NMR (126 MHz, CDCl<sub>3</sub>)** δ 196.9, 174.6, 135.4, 134.1, 128.9, 128.7, 127.1, 112.4, 83.2, 50.8, 40.5, 33.7.

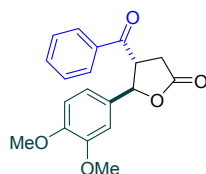

***trans*-4-Benzoyl-5-(3,4-dimethoxyphenyl)dihydrofuran-2(3H)-one (4da)**

The title compound was prepared from 3,4-dimethoxybenzaldehyde (0.3mmol), 2,2-dimethyl-1,3-dioxane-4,6-dione (0.4 mmol) and 2-(dimethyl(oxo)-λ<sup>6</sup>-sulfaneylidene)-1-phenylethan-1-one (0.2 mmol). The crude residue was purified by flash chromatography to give the product. (77%).

**<sup>1</sup>H NMR (500 MHz, CDCl<sub>3</sub>)** δ 7.76 (d, J = 7.8 Hz, 2H), 7.56 (t, J = 7.4 Hz, 1H), 7.41 (t, J = 7.6 Hz, 2H), 6.87 – 6.76 (m, 3H), 5.69 (d, J = 7.8 Hz, 1H), 4.30 (q, J = 9.2 Hz, 1H), 3.81 (d, J = 23.6 Hz, 6H), 3.10 – 2.94 (m, 2H).

**<sup>13</sup>C NMR (126 MHz, CDCl<sub>3</sub>)** δ 196.9, 174.4, 149.5, 149.4, 135.5, 134.4, 130.5, 129.1, 128.8, 118.4, 111.3, 108.7, 82.8, 56.1, 51.3, 34.0.

**HRMS (ESI):** m/z calcd for [C<sub>19</sub>H<sub>18</sub>O<sub>5</sub> + Na]<sup>+</sup> 349.1046; found: 349.1050

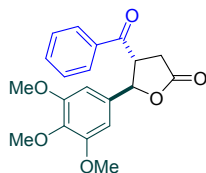

***trans*-4-Benzoyl-5-(3,4,5-trimethoxyphenyl)dihydrofuran-2(3H)-one (4ea)**

The title compound was prepared from 3,4,5-trimethoxybenzaldehyde (0.3mmol), 2,2-dimethyl-1,3-dioxane-4,6-dione (0.4 mmol) and 2-(dimethyl(oxo)-λ<sup>6</sup>-sulfaneylidene)-1-phenylethan-1-one (0.2 mmol). The crude residue was purified by flash chromatography to give the product. (65%).

**<sup>1</sup>H NMR (500 MHz, CDCl<sub>3</sub>)** δ 7.78 (d, J = 8.5 Hz, 2H), 7.65 – 7.55 (m, 1H), 7.44 (t, J = 7.7 Hz, 2H), 6.46 (s, 2H), 5.70 (d, J = 8.0 Hz, 1H), 4.27 (dd, J = 18.0, 9.3 Hz, 1H), 3.78 (d, J = 31.4 Hz, 9H), 3.15 – 2.89 (m, 2H).

**<sup>13</sup>C NMR (126 MHz, CDCl<sub>3</sub>)** δ 196.7, 174.1, 153.6, 138.1, 135.5, 134.4, 133.8, 129.0, 128.7, 102.2, 82.6, 60.9, 56.1, 51.3, 33.9.

**HRMS (ESI):** m/z calcd for [C<sub>20</sub>H<sub>20</sub>O<sub>6</sub> + Na]<sup>+</sup> 379.1152; found: 379.1150

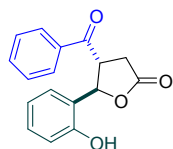

***trans*-4-Benzoyl-5-(2-hydroxyphenyl)dihydrofuran-2(3H)-one (4fa)**

The title compound was prepared from 2-hydroxybenzaldehyde (0.3mmol), 2,2-dimethyl-1,3-dioxane-4,6-dione (0.4 mmol) and 2-(dimethyl(oxo)- $\lambda^6$ -sulfaneylidene)-1-phenylethan-1-one (0.2 mmol). The crude residue was purified by flash chromatography to give the product. (91%).

**$^1\text{H NMR}$  (500 MHz,  $\text{CDCl}_3$ )**  $\delta$  7.80 (d,  $J = 6.9$  Hz, 2H), 7.54 (t,  $J = 7.4$  Hz, 2H), 7.38 (t,  $J = 7.8$  Hz, 2H), 7.18 (t,  $J = 7.7$  Hz, 1H), 7.14 (d,  $J = 7.6$  Hz, 1H), 6.90 (d,  $J = 9.2$  Hz, 1H), 6.84 (t,  $J = 7.5$  Hz, 1H), 5.82 (d,  $J = 5.6$  Hz, 1H), 4.48 (ddd,  $J = 10.0, 7.1, 5.7$  Hz, 1H), 3.14 – 2.87 (m, 2H).

**$^{13}\text{C NMR}$  (126 MHz,  $\text{CDCl}_3$ )**  $\delta$  198.3, 177.2, 154.2, 135.1, 134.3, 130.6, 129.0, 129.0, 128.3, 124.5, 120.5, 116.7, 81.4, 48.3, 33.3.

**HRMS** (ESI):  $m/z$  calcd for  $[\text{C}_{17}\text{H}_{14}\text{O}_4 + \text{Na}]^+$  305.0784; found: 305.0786

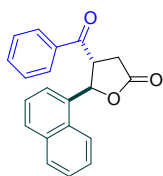

***trans*-4-Benzoyl-5-(naphthalen-1-yl)dihydrofuran-2(3H)-one(4ga)**

The title compound was prepared from 1-naphthaldehyde (0.3mmol), 2,2-dimethyl-1,3-dioxane-4,6-dione (0.4 mmol) and 1-(dimethyl(oxo)- $\lambda^6$ -sulfaneylidene)-4-phenylpentan-2-one (0.2 mmol). The crude residue was purified by flash chromatography to give the product. (98%).

**$^1\text{H NMR}$  (500 MHz,  $\text{CDCl}_3$ )**  $\delta$  7.87 (dd,  $J = 12.5, 8.5$  Hz, 2H), 7.78 (d,  $J = 7.2$  Hz, 2H), 7.70 (d,  $J = 8.5$  Hz, 1H), 7.57 (t,  $J = 6.4$  Hz, 2H), 7.52 – 7.45 (m, 2H), 7.45 – 7.36 (m, 3H), 6.72 (d,  $J = 4.9$  Hz, 1H), 4.39 (dt,  $J = 10.6, 5.6$  Hz, 1H), 3.11 (dd,  $J = 17.9, 10.1$  Hz, 1H), 2.93 (dd,  $J = 17.9, 6.3$  Hz, 1H).

**$^{13}\text{C NMR}$  (126 MHz,  $\text{CDCl}_3$ )**  $\delta$  190.6, 164.8, 162.8, 136.1, 134.3, 133.6, 133.2, 129.5, 129.3, 128.7, 128.7, 128.4, 127.9, 127.7, 127.2, 127.0, 126.7, 105.8, 46.4, 40.3, 39.8, 28.3, 27.8.

**HRMS** (ESI):  $m/z$  calcd for  $[\text{C}_{25}\text{H}_{20}\text{O}_5 + \text{Na}]^+$  423.1203; found: 423.1206

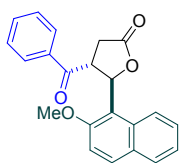

***trans*-4-Benzoyl-5-(2-methoxynaphthalen-1-yl)dihydrofuran-2(3H)-one (4ha)**

The title compound was prepared from 2-methoxy-1-naphthaldehyde (0.3mmol), 2,2-dimethyl-1,3-dioxane-4,6-dione (0.4 mmol) and 1-(dimethyl(oxo)- $\lambda^6$ -sulfaneylidene)-4-phenylpentan-2-one (0.2 mmol). The crude residue was purified by flash chromatography to give the product. (97%).

**$^1\text{H NMR}$  (500 MHz,  $\text{Chloroform-}d$ )**  $\delta$  7.94 (d,  $J = 8.7$  Hz, 1H), 7.90 (d,  $J = 9.0$  Hz, 1H), 7.80 (d,  $J = 8.2$  Hz, 1H), 7.70 (d,  $J = 6.9$  Hz, 2H), 7.47 (dt,  $J = 15.5, 8.0$  Hz, 2H), 7.36 (t,  $J = 7.7$  Hz, 1H), 7.32 – 7.24 (m, 3H), 6.80 (d,  $J = 6.6$  Hz, 1H), 4.67 (ddd,  $J = 10.2, 8.4, 6.6$  Hz, 1H), 3.94 (s, 3H), 3.26 – 3.11 (m, 2H).

**$^{13}\text{C NMR}$  (126 MHz,  $\text{Chloroform-}d$ )**  $\delta$  197.6, 176.0, 156.5, 135.4, 134.1, 132.2, 131.8, 129.2, 129.0, 128.9, 128.9, 127.8, 124.1, 122.1, 119.0, 113.8, 57.0, 48.4, 33.9.



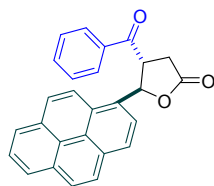

***trans*-4-Benzoyl-5-(pyren-1-yl)dihydrofuran-2(3H)-one (4ia)**

The title compound was prepared from pyrene-1-carbaldehyde (0.3mmol), 2,2-dimethyl -1,3-dioxane-4,6-dione (0.4 mmol) and 2-(dimethyl(oxo)- $\lambda^6$ -sulfaneylidene)-1-phenylethan-1-one (0.2 mmol). The crude residue was purified by flash chromatography to give the product. (75%).

**$^1\text{H}$  NMR (500 MHz,  $\text{CDCl}_3$ )**  $\delta$  8.21 (t,  $J = 7.1$  Hz, 2H), 8.16 (d,  $J = 7.7$  Hz, 1H), 8.13 – 7.96 (m, 6H), 7.74 (d,  $J = 7.1$  Hz, 2H), 7.48 (t,  $J = 7.4$  Hz, 1H), 7.30 (t,  $J = 7.8$  Hz, 2H), 6.99 (d,  $J = 6.0$  Hz, 1H), 4.53 (dd,  $J = 15.7, 7.6$  Hz, 1H), 3.25 – 3.03 (m, 2H).

**$^{13}\text{C}$  NMR (126 MHz,  $\text{CDCl}_3$ )**  $\delta$  197.4, 174.9, 135.2, 134.4, 131.8, 131.6, 131.4, 130.6, 129.1, 128.9, 128.8, 128.3, 127.7, 127.5, 126.5, 126.1, 125.8, 125.3, 125.0, 124.7, 122.8, 121.8, 79.8, 50.9, 33.8.

**HRMS (ESI):**  $m/z$  calcd for  $[\text{C}_{27}\text{H}_{18}\text{O}_3 + \text{Na}]^+$  413.1148; found: 413.1150

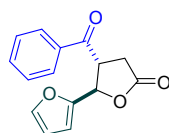

***trans*-4-Benzoyl-5-(furan-2-yl)dihydrofuran-2(3H)-one (4ja)**

The title compound was prepared from furan-2-carbaldehyde (0.3mmol), 2,2-dimethyl -1,3-dioxane-4,6-dione (0.4 mmol) and 2-(dimethyl(oxo)- $\lambda^6$ -sulfaneylidene)-1-phenylethan-1-one (0.2 mmol). The crude residue was purified by flash chromatography to give the product. (73%).

**$^1\text{H}$  NMR (500 MHz,  $\text{CDCl}_3$ )**  $\delta$  7.86 (d,  $J = 7.0$  Hz, 2H), 7.60 (t,  $J = 7.5$  Hz, 1H), 7.51 – 7.42 (m, 3H), 6.43 (d,  $J = 3.3$  Hz, 1H), 6.36 (dd,  $J = 3.4, 1.8$  Hz, 1H), 5.71 (d,  $J = 5.9$  Hz, 1H), 4.62 (dd,  $J = 15.1, 7.5$  Hz, 1H), 3.13 – 2.98 (m, 2H).

**$^{13}\text{C}$  NMR (126 MHz,  $\text{CDCl}_3$ )**  $\delta$  196.2, 174.2, 149.5, 144.1, 134.9, 134.5, 129.2, 128.8, 111.0, 110.9, 75.4, 46.5, 32.4.

**HRMS (ESI):**  $m/z$  calcd for  $[\text{C}_{15}\text{H}_{12}\text{O}_4 + \text{Na}]^+$  279.0628; found: 279.0629

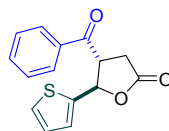

***trans*-4-Benzoyl-5-(thiophen-2-yl)dihydrofuran-2(3H)-one (4ka)**

The title compound was prepared from thiophene-2-carbaldehyde (0.3mmol), 2,2-dimethyl -1,3-dioxane-4,6-dione (0.4 mmol) and 2-(dimethyl(oxo)- $\lambda^6$ -sulfaneylidene)-1-phenylethan-1-one (0.2 mmol). The crude residue was purified by flash chromatography to give the product. (66%).

**$^1\text{H}$  NMR (500 MHz,  $\text{CDCl}_3$ )**  $\delta$  7.86 (d,  $J = 7.6$  Hz, 2H), 7.68 – 7.55 (m, 1H), 7.46 (t,  $J = 7.6$  Hz, 2H), 7.34 (d,  $J = 5.1$  Hz, 1H), 7.05 (d,  $J = 3.6$  Hz, 1H), 7.00 – 6.89 (m, 1H), 6.01 (d,  $J = 6.8$  Hz, 1H), 4.51 – 4.38 (m, 1H), 3.04 (h,  $J = 9.0$  Hz, 2H).

$^{13}\text{C}$  NMR (126 MHz,  $\text{CDCl}_3$ )  $\delta$  196.2, 173.7, 140.6, 135.1, 134.5, 129.2, 128.8, 127.3, 126.8, 126.7, 78.7, 51.0, 33.4.

HRMS (ESI):  $m/z$  calcd for  $[\text{C}_{15}\text{H}_{12}\text{O}_3\text{S} + \text{Na}]^+$  295.0399; found: 295.0402

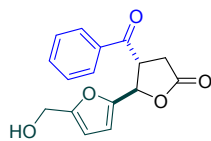

#### ***trans*-4-Benzoyl-5-(5-(hydroxymethyl)furan-2-yl)dihydrofuran-2(3H)-one (4la)**

The title compound was prepared from 5-(hydroxymethyl)furan-2-carbaldehyde (0.3mmol), 2,2-dimethyl-1,3-dioxane-4,6-dione (0.4 mmol) and 2-(dimethyl(oxo)- $\lambda^6$ -sulfaneylidene)-1-phenylethan-1-one (0.2 mmol). The crude residue was purified by flash chromatography to give the product. (52%).

$^1\text{H}$  NMR (500 MHz,  $\text{CDCl}_3$ )  $\delta$  7.88 (d,  $J = 7.8$  Hz, 2H), 7.61 (t,  $J = 7.5$  Hz, 1H), 7.48 (t,  $J = 7.8$  Hz, 2H), 6.39 (d,  $J = 3.2$  Hz, 1H), 6.27 (d,  $J = 3.2$  Hz, 1H), 5.71 (d,  $J = 6.2$  Hz, 1H), 4.65 (dd,  $J = 15.6, 7.7$  Hz, 1H), 4.62 (s, 2H), 3.15 – 2.98 (m, 2H), 1.92 (b, 1H).

$^{13}\text{C}$  NMR (126 MHz,  $\text{CDCl}_3$ )  $\delta$  196.2, 174.3, 155.9, 149.3, 135.0, 134.6, 129.3, 128.9, 111.9, 109.1, 75.6, 57.6, 46.5, 32.7.

HRMS (ESI):  $m/z$  calcd for  $[\text{C}_{16}\text{H}_{14}\text{O}_5 + \text{Na}]^+$  309.0733; found: 209.0735

### 5.3. Spectroscopic Data of Products 5ma--5j'x

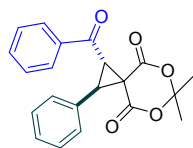

#### ***trans*-1-Benzoyl-6,6-dimethyl-2-phenyl-5,7-dioxaspiro[2.5]octane-4,8-dione (5ma)**

The title compound was prepared from benzaldehyde (0.3mmol), 2,2-dimethyl-1,3-dioxane-4,6-dione (0.4 mmol) and 1-(dimethyl(oxo)- $\lambda^6$ -sulfaneylidene)-4-phenylpentan-2-one (0.2 mmol). The crude residue was purified by flash chromatography to give the product. (75%).

$^1\text{H}$  NMR (500 MHz,  $\text{CDCl}_3$ )  $\delta$  8.02 (d,  $J = 7.0$  Hz, 2H), 7.61 (t,  $J = 7.4$  Hz, 1H), 7.50 (t,  $J = 7.8$  Hz, 2H), 7.43 – 7.36 (m, 5H), 4.44 (d,  $J = 9.6$  Hz, 1H), 4.11 (d,  $J = 9.6$  Hz, 1H), 1.73 (d,  $J = 16.9$  Hz, 6H).

$^{13}\text{C}$  NMR (126 MHz,  $\text{CDCl}_3$ )  $\delta$  190.6, 164.8, 162.7, 136.1, 134.3, 130.3, 129.7, 129.4, 129.2, 128.9, 128.6, 105.8, 46.0, 40.0, 39.7, 28.2, 27.8.

HRMS (ESI):  $m/z$  calcd for  $[\text{C}_{21}\text{H}_{18}\text{O}_5 + \text{Na}]^+$  373.1046; found: 373.1053

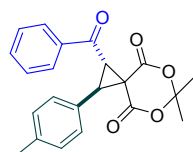

***trans*-1-Benzoyl-6,6-dimethyl-2-(*p*-tolyl)-5,7-dioxaspiro[2.5]octane-4,8-dione (5na)** (Known compound: *Hecheng Huaxue* **2000**, 8, 356-360.)

The title compound was prepared from 4-methylbenzaldehyde (0.3mmol), 2,2-dimethyl-1,3-dioxane-4,6-dione (0.4 mmol) and 1-(dimethyl(oxo)- $\lambda^6$ -sulfaneylidene)-4-phenylpentan-2-one (0.2 mmol). The crude residue was purified by flash chromatography to give the product. (73%).

**<sup>1</sup>H NMR (500 MHz, CDCl<sub>3</sub>)**  $\delta$  8.01 (d, J = 7.0 Hz, 2H), 7.61 (t, J = 7.4 Hz, 1H), 7.49 (t, J = 7.8 Hz, 2H), 7.29 (d, J = 8.1 Hz, 2H), 7.19 (d, J = 7.9 Hz, 2H), 4.43 (d, J = 9.6 Hz, 1H), 4.08 (d, J = 9.7 Hz, 1H), 2.36 (s, 3H), 1.72 (d, J = 16.3 Hz, 6H).

**<sup>13</sup>C NMR (126 MHz, CDCl<sub>3</sub>)**  $\delta$  190.7, 164.9, 162.8, 139.5, 136.1, 134.2, 129.6, 129.6, 129.2, 128.6, 127.2, 105.7, 46.3, 39.9, 39.8, 28.2, 27.8, 21.5.

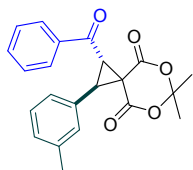

***trans*-1-Benzoyl-6,6-dimethyl-2-(*m*-tolyl)-5,7-dioxaspiro[2.5]octane-4,8-dione (5oa)**

The title compound was prepared from 3-methylbenzaldehyde (0.3mmol), 2,2-dimethyl-1,3-dioxane-4,6-dione (0.4 mmol) and 1-(dimethyl(oxo)- $\lambda^6$ -sulfaneylidene)-4-phenylpentan-2-one (0.2 mmol). The crude residue was purified by flash chromatography to give the product. (85%).

**<sup>1</sup>H NMR (500 MHz, CDCl<sub>3</sub>)**  $\delta$  8.02 (d, J = 7.9 Hz, 2H), 7.60 (t, J = 7.4 Hz, 1H), 7.49 (t, J = 7.7 Hz, 2H), 7.30 – 7.24 (m, 1H), 7.23 – 7.16 (m, 3H), 4.42 (d, J = 9.6 Hz, 1H), 4.08 (d, J = 9.6 Hz, 1H), 2.36 (s, 3H), 1.72 (d, J = 13.6 Hz, 6H).

**<sup>13</sup>C NMR (126 MHz, CDCl<sub>3</sub>)**  $\delta$  190.6, 164.8, 162.7, 138.5, 136.0, 134.1, 130.2, 130.2, 130.1, 129.1, 128.7, 128.5, 126.8, 105.7, 46.1, 39.9, 39.6, 28.1, 27.7, 21.6.

**HRMS (ESI):** m/z calcd for [C<sub>22</sub>H<sub>20</sub>O<sub>5</sub> + Na]<sup>+</sup> 387.1023; found: 387.1210

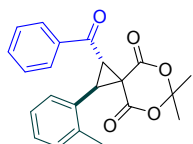

***trans*-1-Benzoyl-6,6-dimethyl-2-(*o*-tolyl)-5,7-dioxaspiro[2.5]octane-4,8-dione (5pa)**

The title compound was prepared from 2-methylbenzaldehyde (0.3mmol), 2,2-dimethyl-1,3-dioxane-4,6-dione (0.4 mmol) and 1-(dimethyl(oxo)- $\lambda^6$ -sulfaneylidene)-4-phenylpentan-2-one (0.2 mmol). The crude residue was purified by flash chromatography to give the product. (82%).

**<sup>1</sup>H NMR (500 MHz, CDCl<sub>3</sub>)**  $\delta$  8.05 (d, J = 7.0 Hz, 2H), 7.63 (t, J = 7.5 Hz, 1H), 7.50 (t, J = 7.8 Hz, 2H), 7.47 – 7.42 (m, 1H), 7.33 – 7.28 (m, 2H), 7.27 – 7.22 (m, 1H), 4.24 (d, J = 9.9 Hz, 1H), 4.19 (d, J = 10.0 Hz, 1H), 2.31 (s, 3H), 1.88 (s, 3H), 1.76 (s, 3H).

**<sup>13</sup>C NMR (126 MHz, CDCl<sub>3</sub>)**  $\delta$  190.8, 165.3, 163.6, 138.3, 135.7, 134.3, 130.5, 129.6, 129.1, 128.9, 128.7, 128.3, 126.2, 105.7, 45.0, 43.3, 36.5, 28.1, 27.7, 19.8.

**HRMS (ESI):** m/z calcd for [C<sub>22</sub>H<sub>20</sub>O<sub>5</sub> + Na]<sup>+</sup> 387.1203; found: 387.1207

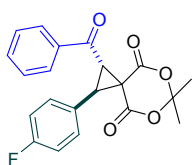

***trans*-1-Benzoyl-2-(4-fluorophenyl)-6,6-dimethyl-5,7-dioxaspiro[2.5]octane-4,8-dione (5qa)**

The title compound was prepared from 4-fluorobenzaldehyde (0.3mmol), 2,2-dimethyl-1,3-dioxane-4,6-dione (0.4 mmol) and 1-(dimethyl(oxo)- $\lambda^6$ -sulfaneylidene)-4-phenylpentan-2-one (0.2 mmol). The crude residue was purified by flash chromatography to give the product. (78%).

**<sup>1</sup>H NMR (500 MHz, CDCl<sub>3</sub>)**  $\delta$  8.00 (d, *J* = 6.9 Hz, 2H), 7.62 (t, *J* = 7.4 Hz, 1H), 7.50 (t, *J* = 7.8 Hz, 2H), 7.40 (dd, *J* = 8.6, 5.2 Hz, 2H), 7.09 (t, *J* = 8.5 Hz, 2H), 4.39 (d, *J* = 9.6 Hz, 1H), 4.09 (d, *J* = 9.6 Hz, 1H), 1.72 (d, *J* = 25.8 Hz, 6H).

**<sup>13</sup>C NMR (126 MHz, CDCl<sub>3</sub>)**  $\delta$  190.1, 164.4, 163.1 (d, *J* = 249.5 Hz), 162.6, 135.8, 134.1, 131.3 (d, *J* = 8.7 Hz), 129.1, 128.4, 125.9, 115.9 (d, *J* = 21.8 Hz), 105.6, 44.9, 40.1, 39.3, 38.5 (d, *J* = 5037.8 Hz), 28.1, 27.6.

**<sup>19</sup>F NMR (471 MHz, Chloroform-*d*)**  $\delta$  -111.60.

**HRMS (ESI):** *m/z* calcd for [C<sub>21</sub>H<sub>17</sub>FO<sub>5</sub> + Na]<sup>+</sup> 391.0952; found: 391.0960

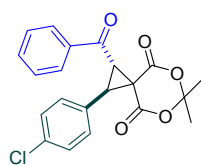

***trans*-1-Benzoyl-2-(4-chlorophenyl)-6,6-dimethyl-5,7-dioxaspiro[2.5]octane-4,8-dione (5ra)**

(Known compound: *Hecheng Huaxue* **2000**, 8, 356-360.)

The title compound was prepared from 4-chlorobenzaldehyde (0.3mmol), 2,2-dimethyl-1,3-dioxane-4,6-dione (0.4 mmol) and 1-(dimethyl(oxo)- $\lambda^6$ -sulfaneylidene)-4-phenylpentan-2-one (0.2 mmol). The crude residue was purified by flash chromatography to give the product. (73%).

**<sup>1</sup>H NMR (500 MHz, CDCl<sub>3</sub>)**  $\delta$  7.99 (d, *J* = 9.7 Hz, 2H), 7.60 (d, *J* = 7.5 Hz, 1H), 7.48 (d, *J* = 7.8 Hz, 2H), 7.35 (s, 4H), 4.39 (d, *J* = 9.6 Hz, 1H), 4.08 (d, *J* = 9.5 Hz, 1H), 1.72 (d, *J* = 26.1 Hz, 6H).

**<sup>13</sup>C NMR (126 MHz, CDCl<sub>3</sub>)**  $\delta$  190.0, 164.4, 162.5, 135.7, 135.3, 134.1, 130.8, 129.1, 128.9, 128.7, 128.4, 105.7, 44.7, 40.0, 39.3, 28.1, 27.6.

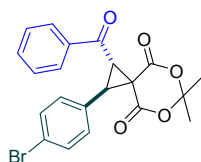

***trans*-1-Benzoyl-2-(4-bromophenyl)-6,6-dimethyl-5,7-dioxaspiro[2.5]octane-4,8-dione (5sa)**

The title compound was prepared from 4-bromobenzaldehyde (0.3mmol), 2,2-dimethyl-1,3-dioxane-4,6-dione (0.4 mmol) and 1-(dimethyl(oxo)- $\lambda^6$ -sulfaneylidene)-4-phenylpentan-2-one (0.2 mmol). The crude residue was purified by flash chromatography to give the product. (71%).

**<sup>1</sup>H NMR (500 MHz, CDCl<sub>3</sub>)**  $\delta$  7.99 (d, *J* = 7.0 Hz, 2H), 7.61 (t, *J* = 7.4 Hz, 1H), 7.55 – 7.46 (m, 4H), 7.29 (d, *J* = 8.5 Hz, 2H), 4.38 (d, *J* = 9.6 Hz, 1H), 4.06 (d, *J* = 9.6 Hz, 1H), 1.72 (d, *J* = 27.3 Hz, 6H).

**<sup>13</sup>C NMR (126 MHz, CDCl<sub>3</sub>)**  $\delta$  190.0, 164.4, 162.5, 135.7, 134.1, 131.9, 131.1, 129.2, 129.1, 128.4, 123.5, 105.7, 44.7, 39.9, 39.2, 28.1, 27.6.

**HRMS (ESI):** *m/z* calcd for [C<sub>21</sub>H<sub>17</sub>BrO<sub>5</sub> + Na]<sup>+</sup> 453.0131; found: 453.0139

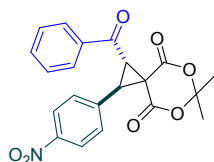

***trans*-1-Benzoyl-6,6-dimethyl-2-(4-nitrophenyl)-5,7-dioxaspiro[2.5]octane-4,8-dione (5ta)**

The title compound was prepared from 4-nitrobenzaldehyde (0.3mmol), 2,2-dimethyl-1,3-dioxane-4,6-dione (0.4 mmol) and 1-(dimethyl(oxo)- $\lambda^6$ -sulfaneylidene)-4-phenylpentan-2-one (0.2 mmol). The crude residue was purified by flash chromatography to give the product. (84%).

**<sup>1</sup>H NMR (500 MHz, CDCl<sub>3</sub>)**  $\delta$  8.27 (d, J = 8.8 Hz, 2H), 7.99 (d, J = 8.1 Hz, 2H), 7.62 (dd, J = 15.9, 8.1 Hz, 3H), 7.52 (t, J = 7.7 Hz, 2H), 4.41 (d, J = 9.5 Hz, 1H), 4.18 (d, J = 9.5 Hz, 1H), 1.75 (d, J = 33.7 Hz, 6H).

**<sup>13</sup>C NMR (126 MHz, CDCl<sub>3</sub>)**  $\delta$  189.7, 164.2, 162.7, 148.3, 137.9, 135.7, 134.5, 130.7, 129.3, 128.6, 124.0, 106.1, 43.5, 40.8, 39.0, 28.4, 27.8.

**HRMS (ESI):** m/z calcd for [C<sub>21</sub>H<sub>17</sub>NO<sub>7</sub> + Na]<sup>+</sup> 418.0897; found: 418.0902

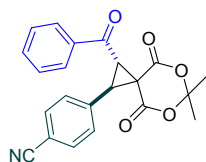

**4-(*trans*-2-Benzoyl-6,6-dimethyl-4,8-dioxo-5,7-dioxaspiro[2.5]octan-1-yl)benzotrile (5ua)**

The title compound was prepared from 4-formylbenzotrile (0.3mmol), 2,2-dimethyl-1,3-dioxane-4,6-dione (0.4 mmol) and 1-(dimethyl(oxo)- $\lambda^6$ -sulfaneylidene)-4-phenylpentan-2-one (0.2 mmol). The crude residue was purified by flash chromatography to give the product. (69%).

**<sup>1</sup>H NMR (500 MHz, CDCl<sub>3</sub>)**  $\delta$  7.98 (d, J = 7.5 Hz, 2H), 7.69 (d, J = 8.3 Hz, 2H), 7.63 (t, J = 7.4 Hz, 1H), 7.57 – 7.46 (m, 4H), 4.39 (d, J = 9.5 Hz, 1H), 4.14 (d, J = 9.5 Hz, 1H), 1.74 (d, J = 34.9 Hz, 6H).

**<sup>13</sup>C NMR (126 MHz, CDCl<sub>3</sub>)**  $\delta$  189.7, 164.3, 162.7, 135.9, 135.7, 134.6, 132.6, 130.5, 129.3, 128.6, 118.4, 113.2, 106.1, 44.0, 40.5, 39.0, 28.4, 27.8.

**HRMS (ESI):** m/z calcd for [C<sub>22</sub>H<sub>17</sub>NO<sub>5</sub> + Na]<sup>+</sup> 398.0999; found: 398.1003

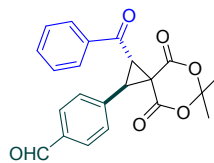

**4-(*trans*-2-Benzoyl-6,6-dimethyl-4,8-dioxo-5,7-dioxaspiro[2.5]octan-1-yl)benzaldehyde (5va)**

The title compound was prepared from terephthalaldehyde (0.3mmol), 2,2-dimethyl-1,3-dioxane-4,6-dione (0.4 mmol) and 1-(dimethyl(oxo)- $\lambda^6$ -sulfaneylidene)-4-phenylpentan-2-one (0.2 mmol). The crude residue was purified by flash chromatography to give the product. (56%).

**<sup>1</sup>H NMR (500 MHz, CDCl<sub>3</sub>)**  $\delta$  10.02 (s, 1H), 8.00 (d, J = 8.2 Hz, 2H), 7.91 (d, J = 8.3 Hz, 2H), 7.66 – 7.56 (m, 3H), 7.50 (t, J = 7.7 Hz, 2H), 4.45 (d, J = 9.5 Hz, 1H), 4.17 (d, J = 9.5 Hz, 1H), 1.73 (d, J = 25.2 Hz, 6H).

**<sup>13</sup>C NMR (126 MHz, CDCl<sub>3</sub>)**  $\delta$  191.5, 189.8, 164.2, 162.5, 136.9, 136.6, 135.7, 134.2, 130.3, 129.9, 129.1, 128.4, 105.8, 44.3, 40.3, 39.0, 28.1, 27.6.

**HRMS (ESI):** m/z calcd for [C<sub>22</sub>H<sub>18</sub>O<sub>6</sub> + Na]<sup>+</sup> 401.0996; found: 401.1002

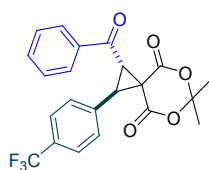

***trans*-1-Benzoyl-6,6-dimethyl-2-(4-(trifluoromethyl)phenyl)-5,7-dioxaspiro[2.5]octane-4,8-dione (5wa)**

The title compound was prepared from 4-(trifluoromethyl)benzaldehyde (0.3mmol), 2,2-dimethyl-1,3-dioxane-4,6-dione (0.4 mmol) and 1-(dimethyl(oxo)- $\lambda^6$ -sulfaneylidene)-4-phenylpentan-2-one (0.2 mmol). The crude residue was purified by flash chromatography to give the product. (73%).

**$^1\text{H}$  NMR (500 MHz,  $\text{CDCl}_3$ )**  $\delta$  8.00 (d,  $J = 7.0$  Hz, 2H), 7.68 – 7.60 (m, 3H), 7.57 – 7.47 (m, 4H), 4.43 (d,  $J = 9.5$  Hz, 1H), 4.14 (d,  $J = 9.5$  Hz, 1H), 1.77 (s, 3H), 1.71 (s, 3H).

**$^{13}\text{C}$  NMR (126 MHz,  $\text{CDCl}_3$ )**  $\delta$  190.0, 164.5, 162.7, 135.9, 134.5, 131.4 (d,  $J = 32.7$  Hz), 130.1, 129.3, 128.6, 128.4 (d,  $J = 210.0$  Hz), 125.9 (q,  $J = 3.7$  Hz), 124.0 (d,  $J = 272.3$  Hz), 106.0, 44.4, 40.4, 39.2, 28.4, 27.8.

**$^{19}\text{F}$  NMR (471 MHz, Chloroform-*d*)**  $\delta$  -62.8.

**HRMS (ESI):**  $m/z$  calcd for  $[\text{C}_{22}\text{H}_{17}\text{F}_3\text{O}_5 + \text{Na}]^+$  441.0920; found: 441.0922

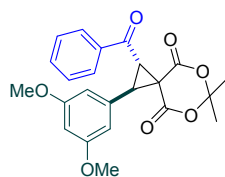

***trans*-1-Benzoyl-2-(3,5-dimethoxyphenyl)-6,6-dimethyl-5,7-dioxaspiro[2.5]octane-4,8-dione (5xa)**

The title compound was prepared from 3,5-dimethoxybenzaldehyde (0.3mmol), 2,2-dimethyl-1,3-dioxane-4,6-dione (0.4 mmol) and 1-(dimethyl(oxo)- $\lambda^6$ -sulfaneylidene)-4-phenylpentan-2-one (0.2 mmol). The crude residue was purified by flash chromatography to give the product. (91%).

**$^1\text{H}$  NMR (500 MHz,  $\text{CDCl}_3$ )**  $\delta$  8.00 (d,  $J = 7.0$  Hz, 2H), 7.59 (t,  $J = 7.5$  Hz, 1H), 7.47 (t,  $J = 7.8$  Hz, 2H), 6.55 (d,  $J = 2.3$  Hz, 2H), 6.44 (s, 1H), 4.39 (d,  $J = 9.6$  Hz, 1H), 4.01 (d,  $J = 9.6$  Hz, 1H), 3.76 (s, 6H), 1.72 (d,  $J = 5.8$  Hz, 6H).

**$^{13}\text{C}$  NMR (126 MHz,  $\text{CDCl}_3$ )**  $\delta$  190.4, 164.7, 162.6, 160.9, 136.0, 134.1, 132.5, 129.1, 128.5, 107.7, 105.7, 101.1, 55.5, 45.9, 40.1, 39.6, 28.0, 27.7.

**HRMS (ESI):**  $m/z$  calcd for  $[\text{C}_{23}\text{H}_{22}\text{O}_7 + \text{Na}]^+$  433.1258; found: 433.1265

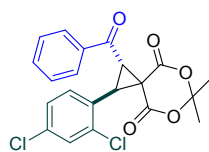

***trans*-1-Benzoyl-2-(2,4-dichlorophenyl)-6,6-dimethyl-5,7-dioxaspiro[2.5]octane-4,8-dione (5ya)**

The title compound was prepared from 2,4-dichlorobenzaldehyde (0.3mmol), 2,2-dimethyl-1,3-

dioxane-4,6-dione (0.4 mmol) and 1-(dimethyl(oxo)- $\lambda^6$ -sulfaneylidene)-4-phenylpentan-2-one (0.2 mmol). The crude residue was purified by flash chromatography to give the product. (91%).  
**<sup>1</sup>H NMR (500 MHz, CDCl<sub>3</sub>)**  $\delta$  7.95 (d, J = 6.8 Hz, 2H), 7.59 (t, J = 7.5 Hz, 1H), 7.46 (t, J = 7.7 Hz, 2H), 7.43 – 7.38 (m, 2H), 7.29 (d, J = 6.3 Hz, 1H), 4.26 – 4.16 (m, 2H), 1.76 (d, J = 11.6 Hz, 6H).

**<sup>13</sup>C NMR (126 MHz, CDCl<sub>3</sub>)**  $\delta$  189.9, 164.4, 163.3, 136.5, 135.6, 135.4, 134.3, 131.1, 129.5, 129.1, 128.5, 128.2, 127.3, 106.0, 42.5, 42.5, 36.6, 28.0, 27.7.

**HRMS (ESI):** m/z calcd for [C<sub>21</sub>H<sub>16</sub>Cl<sub>2</sub>O<sub>5</sub> + Na]<sup>+</sup> 441.0267; found: 441.0271

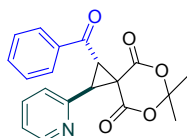

***trans*-1-Benzoyl-6,6-dimethyl-2-(pyridin-2-yl)-5,7-dioxaspiro[2.5]octane-4,8-dione (5za)**

The title compound was prepared from picolinaldehyde (0.3mmol), 2,2-dimethyl-1,3-dioxane-4,6-dione (0.4 mmol) and 1-(dimethyl(oxo)- $\lambda^6$ -sulfaneylidene)-4-phenylpentan-2-one (0.2 mmol). The crude residue was purified by flash chromatography to give the product. (70%).

**<sup>1</sup>H NMR (500 MHz, CDCl<sub>3</sub>)**  $\delta$  8.58 (d, J = 5.7 Hz, 1H), 8.07 (d, J = 6.9 Hz, 2H), 7.72 (t, J = 7.7 Hz, 1H), 7.60 (d, J = 7.2 Hz, 1H), 7.49 (t, J = 7.7 Hz, 2H), 7.39 (d, J = 7.8 Hz, 1H), 7.29 – 7.25 (m, 1H), 4.45 (d, J = 9.3 Hz, 1H), 4.26 (s, 1H), 1.97 (s, 3H), 1.79 (s, 3H).

**<sup>13</sup>C NMR (126 MHz, CDCl<sub>3</sub>)**  $\delta$  190.5, 164.9, 163.6, 151.6, 149.7, 137.0, 135.9, 134.3, 129.2, 128.7, 124.3, 123.7, 106.4, 44.6, 41.1, 37.5, 28.0, 27.8.

**HRMS (ESI):** m/z calcd for [C<sub>20</sub>H<sub>17</sub>NO<sub>5</sub> + Na]<sup>+</sup> 374.0999; found: 374.0997

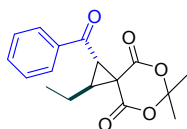

***trans*-1-Benzoyl-2-ethyl-6,6-dimethyl-5,7-dioxaspiro[2.5]octane-4,8-dione (5a'a)**

The title compound was prepared from propionaldehyde (0.3mmol), 2,2-dimethyl-1,3-dioxane-4,6-dione (0.4 mmol) and 1-(dimethyl(oxo)- $\lambda^6$ -sulfaneylidene)-4-phenylpentan-2-one (0.2 mmol). The crude residue was purified by flash chromatography to give the product as a white solid. (95%, Mp. 143-147 °C).

**<sup>1</sup>H NMR (500 MHz, CDCl<sub>3</sub>)**  $\delta$  7.88 (d, J = 8.4 Hz, 2H), 7.53 (t, J = 7.5 Hz, 1H), 7.45 – 7.38 (m, 2H), 3.60 (d, J = 9.1 Hz, 1H), 2.91 – 2.77 (m, 1H), 1.93 – 1.71 (m, 8H), 1.12 – 1.03 (m, 3H).

**<sup>13</sup>C NMR (126 MHz, CDCl<sub>3</sub>)**  $\delta$  190.7, 165.2, 164.7, 135.9, 133.8, 128.9, 128.2, 105.4, 43.6, 43.1, 35.8, 27.6, 27.5, 19.9, 12.9.

**HRMS (ESI):** m/z calcd for [C<sub>17</sub>H<sub>18</sub>O<sub>5</sub> + Na]<sup>+</sup> 325.1046; found: 325.1049

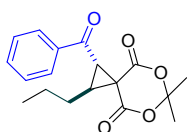

***trans*-1-Benzoyl-6,6-dimethyl-2-propyl-5,7-dioxaspiro[2.5]octane-4,8-dione (5b'a)**

The title compound was prepared from butyraldehyde (0.3mmol), 2,2-dimethyl-1,3-dioxane-4,6-dione (0.4 mmol) and 1-(dimethyl(oxo)- $\lambda^6$ -sulfaneylidene)-4-phenylpentan-2-one (0.2 mmol). The crude residue was purified by flash chromatography to give the product. (97%).

**$^1\text{H NMR}$  (500 MHz,  $\text{CDCl}_3$ )**  $\delta$  7.90 (d,  $J = 7.0$  Hz, 2H), 7.55 (t,  $J = 7.4$  Hz, 1H), 7.44 (t,  $J = 7.8$  Hz, 2H), 3.64 (d,  $J = 9.1$  Hz, 1H), 2.88 (td,  $J = 8.8, 6.0$  Hz, 1H), 1.86 (dq,  $J = 13.7, 7.2$  Hz, 1H), 1.77 (d,  $J = 14.0$  Hz, 6H), 1.70 (dd,  $J = 13.7, 7.9$  Hz, 1H), 1.53 (h,  $J = 7.4$  Hz, 2H), 0.99 (t,  $J = 7.4$  Hz, 3H).

**$^{13}\text{C NMR}$  (126 MHz,  $\text{CDCl}_3$ )**  $\delta$  190.8, 165.3, 164.8, 136.0, 133.9, 129.0, 128.3, 105.5, 43.6, 41.7, 35.8, 28.3, 27.7, 27.6, 21.9, 13.7.

**HRMS** (ESI):  $m/z$  calcd for  $[\text{C}_{18}\text{H}_{20}\text{O}_5 + \text{Na}]^+$  339.1203; found: 339.1206

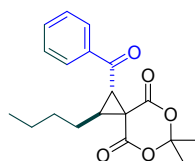

***trans*-1-Benzoyl-2-butyl-6,6-dimethyl-5,7-dioxaspiro[2.5]octane-4,8-dione (5c'a)**

The title compound was prepared from pentanal (0.3mmol), 2,2-dimethyl-1,3-dioxane-4,6-dione (0.4 mmol) and 1-(dimethyl(oxo)- $\lambda^6$ -sulfaneylidene)-4-phenylpentan-2-one (0.2 mmol). The crude residue was purified by flash chromatography to give the product. (96%).

**$^1\text{H NMR}$  (500 MHz,  $\text{CDCl}_3$ )**  $\delta$  7.93 (d,  $J = 7.0$  Hz, 2H), 7.58 (t,  $J = 7.4$  Hz, 1H), 7.46 (t,  $J = 7.7$  Hz, 2H), 3.66 (d,  $J = 9.0$  Hz, 1H), 2.90 (td,  $J = 8.7, 6.1$  Hz, 1H), 1.89 (dq,  $J = 13.9, 7.2$  Hz, 1H), 1.80 (d,  $J = 14.1$  Hz, 6H), 1.78 – 1.71 (m, 1H), 1.54 – 1.36 (m, 4H), 0.92 (t,  $J = 7.2$  Hz, 3H).

**$^{13}\text{C NMR}$  (126 MHz,  $\text{CDCl}_3$ )**  $\delta$  190.9, 165.4, 164.9, 136.1, 134.0, 129.1, 128.4, 105.5, 43.7, 41.9, 36.0, 30.8, 27.8, 27.7, 26.2, 22.3, 14.1.

**HRMS** (ESI):  $m/z$  calcd for  $[\text{C}_{19}\text{H}_{22}\text{O}_5 + \text{Na}]^+$  353.1359; found: 353.1361

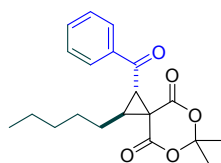

***trans*-1-Benzoyl-6,6-dimethyl-2-pentyl-5,7-dioxaspiro[2.5]octane-4,8-dione (5d'a)**

The title compound was prepared from hexanal (0.3mmol), 2,2-dimethyl-1,3-dioxane-4,6-dione (0.4 mmol) and 1-(dimethyl(oxo)- $\lambda^6$ -sulfaneylidene)-4-phenylpentan-2-one (0.2 mmol). The crude residue was purified by flash chromatography to give the product. (82%).

**$^1\text{H NMR}$  (500 MHz,  $\text{CDCl}_3$ )**  $\delta$  7.89 (d,  $J = 7.0$  Hz, 2H), 7.54 (t,  $J = 7.5$  Hz, 1H), 7.42 (t,  $J = 7.8$  Hz, 2H), 3.63 (d,  $J = 9.2$  Hz, 1H), 2.87 (td,  $J = 8.7, 6.0$  Hz, 1H), 1.86 (dq,  $J = 14.0, 7.5$  Hz, 1H), 1.76 (d,  $J = 15.2$  Hz, 6H), 1.74 – 1.67 (m, 1H), 1.49 (p,  $J = 7.4$  Hz, 2H), 1.43 – 1.24 (m, 4H), 0.86 (t,  $J = 7.0$  Hz, 3H).

**$^{13}\text{C NMR}$  (126 MHz,  $\text{CDCl}_3$ )**  $\delta$  190.8, 165.2, 164.8, 136.0, 133.9, 128.9, 128.3, 105.4, 43.6, 41.8, 35.8, 31.2, 28.2, 27.6, 27.5, 26.3, 22.5, 14.0.

**HRMS** (ESI):  $m/z$  calcd for  $[\text{C}_{20}\text{H}_{24}\text{O}_5 + \text{Na}]^+$  367.1516; found: 367.1518



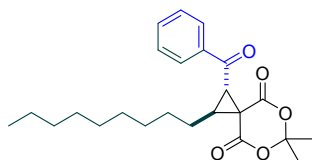

***trans*-1-Benzoyl-6,6-dimethyl-2-nonyl-5,7-dioxaspiro[2.5]octane-4,8-dione (5e'a)**

The title compound was prepared from decanal (0.3mmol), 2,2-dimethyl-1,3-dioxane-4,6-dione (0.4 mmol) and 1-(dimethyl(oxo)- $\lambda^6$ -sulfaneylidene)-4-phenylpentan-2-one (0.2 mmol). The crude residue was purified by flash chromatography to give the product. (98%).

**$^1\text{H}$  NMR (500 MHz,  $\text{CDCl}_3$ )**  $\delta$  7.87 (d,  $J = 7.1$  Hz, 2H), 7.50 (t,  $J = 7.4$  Hz, 1H), 7.39 (t,  $J = 7.7$  Hz, 2H), 3.61 (d,  $J = 9.1$  Hz, 1H), 2.85 (td,  $J = 8.8, 6.0$  Hz, 1H), 1.84 (dq,  $J = 13.9, 7.0$  Hz, 1H), 1.73 (d,  $J = 16.3$  Hz, 6H), 1.68 (dd,  $J = 13.3, 5.6$  Hz, 1H), 1.47 (p,  $J = 7.4$  Hz, 2H), 1.33 (dd,  $J = 9.5, 5.6$  Hz, 2H), 1.28 – 1.16 (m, 10H), 0.82 (t,  $J = 6.8$  Hz, 3H).

**$^{13}\text{C}$  NMR (126 MHz,  $\text{CDCl}_3$ )**  $\delta$  190.6, 165.1, 164.7, 135.9, 133.7, 128.8, 128.2, 105.3, 43.4, 41.7, 35.8, 31.8, 29.4, 29.4, 29.2, 29.0, 28.4, 27.5, 27.4, 26.2, 22.6, 14.1.

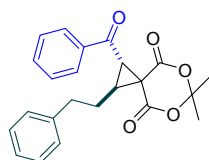

***trans*-1-Benzoyl-6,6-dimethyl-2-phenethyl-5,7-dioxaspiro[2.5]octane-4,8-dione (5f'a)**

The title compound was prepared from 3-phenylpropanal (0.3mmol), 2,2-dimethyl-1,3-dioxane-4,6-dione (0.4 mmol) and 1-(dimethyl(oxo)- $\lambda^6$ -sulfaneylidene)-4-phenylpentan-2-one (0.2 mmol). The crude residue was purified by flash chromatography to give the product. (94%).

**$^1\text{H}$  NMR (500 MHz,  $\text{CDCl}_3$ )**  $\delta$  7.92 (d,  $J = 8.4$  Hz, 2H), 7.58 (d,  $J = 7.3$  Hz, 1H), 7.47 (t,  $J = 7.7$  Hz, 2H), 7.30 (t,  $J = 7.6$  Hz, 2H), 7.25 – 7.17 (m, 3H), 3.62 (d,  $J = 9.1$  Hz, 1H), 3.02 – 2.94 (m, 1H), 2.83 (hept,  $J = 7.3$  Hz, 2H), 2.25 (td,  $J = 14.3, 7.5$  Hz, 1H), 2.18 – 2.08 (m, 1H), 1.77 (d,  $J = 5.7$  Hz, 6H).

**$^{13}\text{C}$  NMR (126 MHz,  $\text{CDCl}_3$ )**  $\delta$  190.66, 165.19, 164.99, 140.23, 135.99, 134.03, 129.04, 128.75, 128.41, 126.54, 105.48, 43.84, 41.26, 35.51, 34.81, 28.23, 27.74, 27.63.

**HRMS (ESI):**  $m/z$  calcd for  $[\text{C}_{23}\text{H}_{22}\text{O}_5 + \text{Na}]^+$  401.1359; found: 401.1360

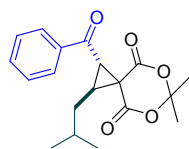

***trans*-1-Benzoyl-2-isobutyl-6,6-dimethyl-5,7-dioxaspiro[2.5]octane-4,8-dione (5g'a)**

The title compound was prepared from 3-methylbutanal (0.3mmol), 2,2-dimethyl-1,3-dioxane-4,6-dione (0.4 mmol) and 1-(dimethyl(oxo)- $\lambda^6$ -sulfaneylidene)-4-phenylpentan-2-one (0.2 mmol). The crude residue was purified by flash chromatography to give the product. (96%).

**$^1\text{H}$  NMR (500 MHz,  $\text{CDCl}_3$ )**  $\delta$  7.92 (d,  $J = 7.0$  Hz, 2H), 7.56 (d,  $J = 7.5$  Hz, 1H), 7.46 (t,  $J = 7.8$  Hz, 2H), 3.69 (d,  $J = 9.1$  Hz, 1H), 2.91 (td,  $J = 9.2, 4.7$  Hz, 1H), 1.85 – 1.74 (m, 8H), 1.58 – 1.50 (m, 1H), 1.01 (t,  $J = 5.9$  Hz, 6H).

**$^{13}\text{C}$  NMR (126 MHz,  $\text{CDCl}_3$ )**  $\delta$  190.9, 165.4, 165.0, 136.1, 134.1, 129.1, 128.4, 105.5, 43.6, 40.8, 35.9, 35.1, 28.3, 27.8, 27.8, 22.7, 22.3.

**HRMS** (ESI):  $m/z$  calcd for  $[C_{19}H_{22}O_5 + Na]^+$  353.1359; found: 353.1364

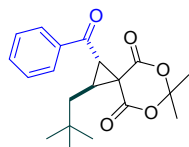

***trans*-1-Benzoyl-6,6-dimethyl-2-neopentyl-5,7-dioxaspiro[2.5]octane-4,8-dione (5h'a)**

The title compound was prepared from 3,3-dimethylbutanal (0.3mmol), 2,2-dimethyl-1,3-dioxane-4,6-dione (0.4 mmol) and 1-(dimethyl(oxo)- $\lambda^6$ -sulfaneylidene)-4-phenylpentan-2-one (0.2 mmol). The crude residue was purified by flash chromatography to give the product. (92%).

**$^1H$  NMR (500 MHz,  $CDCl_3$ )**  $\delta$  7.93 (d,  $J = 7.0$  Hz, 2H), 7.58 (t,  $J = 7.4$  Hz, 1H), 7.47 (t,  $J = 7.8$  Hz, 2H), 3.74 (d,  $J = 9.1$  Hz, 1H), 2.90 (ddd,  $J = 10.6, 9.1, 3.6$  Hz, 1H), 1.79 (d,  $J = 14.0$  Hz, 6H), 1.74 (dd,  $J = 13.5, 3.6$  Hz, 1H), 1.51 (dd,  $J = 13.5, 10.7$  Hz, 1H), 1.05 (s, 9H).

**$^{13}C$  NMR (126 MHz,  $CDCl_3$ )**  $\delta$  190.9, 165.5, 164.9, 136.1, 134.1, 129.2, 128.4, 105.5, 43.7, 39.9, 39.5, 35.5, 31.8, 29.6, 27.8, 27.8.

**HRMS** (ESI):  $m/z$  calcd for  $[C_{20}H_{24}O_5 + Na]^+$  367.1516; found: 367.1519

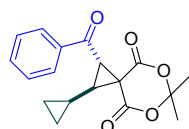

***trans*-1-Benzoyl-2-cyclopropyl-6,6-dimethyl-5,7-dioxaspiro[2.5]octane-4,8-dione (5i'a)**

The title compound was prepared from cyclopropanecarbaldehyde (0.3mmol), 2,2-dimethyl-1,3-dioxane-4,6-dione (0.4 mmol) and 1-(dimethyl(oxo)- $\lambda^6$ -sulfaneylidene)-4-phenylpentan-2-one (0.2 mmol). The crude residue was purified by flash chromatography to give the product as a yellow solid. (93%, Mp. 150-156 °C).

**$^1H$  NMR (500 MHz,  $CDCl_3$ )**  $\delta$  7.94 (d,  $J = 7.0$  Hz, 2H), 7.57 (t,  $J = 7.4$  Hz, 1H), 7.45 (t,  $J = 7.8$  Hz, 2H), 3.87 (d,  $J = 9.1$  Hz, 1H), 2.36 (t,  $J = 9.1$  Hz, 1H), 1.83 (d,  $J = 35.7$  Hz, 6H), 1.20 – 1.08 (m, 1H), 0.83 – 0.76 (m, 1H), 0.74 – 0.62 (m, 2H), 0.52 – 0.40 (m, 1H).

**$^{13}C$  NMR (126 MHz,  $CDCl_3$ )**  $\delta$  190.6, 165.2, 164.9, 136.0, 134.0, 129.0, 128.5, 105.6, 47.2, 43.3, 36.6, 27.7, 27.5, 8.2, 5.3, 4.9.

**HRMS** (ESI):  $m/z$  calcd for  $[C_{18}H_{18}O_5 + Na]^+$  337.1046; found: 337.1050

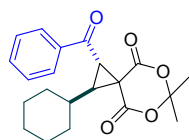

***trans*-1-Benzoyl-2-cyclohexyl-6,6-dimethyl-5,7-dioxaspiro[2.5]octane-4,8-dione (5j'a)**

The title compound was prepared from cyclohexanecarbaldehyde (0.3mmol), 2,2-dimethyl-1,3-dioxane-4,6-dione (0.4 mmol) and 1-(dimethyl(oxo)- $\lambda^6$ -sulfaneylidene)-4-phenylpentan-2-one (0.2 mmol). The crude residue was purified by flash chromatography to give the product. (98%).

**$^1H$  NMR (500 MHz,  $CDCl_3$ )**  $\delta$  7.91 (d,  $J = 7.0$  Hz, 2H), 7.57 (t,  $J = 7.5$  Hz, 1H), 7.46 (t,  $J = 7.8$  Hz, 2H), 3.64 (d,  $J = 9.2$  Hz, 1H), 2.78 (t,  $J = 9.6$  Hz, 1H), 1.93 – 1.62 (m, 12H), 1.44 – 1.25 (m, 5H).

$^{13}\text{C}$  NMR (126 MHz,  $\text{CDCl}_3$ )  $\delta$  190.8, 165.5, 165.2, 136.1, 134.0, 129.1, 128.4, 105.8, 48.1, 44.9, 35.5, 32.8, 32.5, 28.3, 28.0, 26.0, 25.9, 25.6.

HRMS (ESI):  $m/z$  calcd for  $[\text{C}_{21}\text{H}_{24}\text{O}_5 + \text{Na}]^+$  397.1516; found: 397.1519

#### 5.4. Spectroscopic Data of Products 5c'b--5c'x

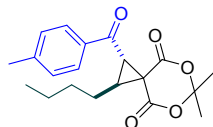

##### ***trans*-1-Butyl-6,6-dimethyl-2-(4-methylbenzoyl)-5,7-dioxaspiro[2.5]octane-4,8-dione (5c'b)**

The title compound was prepared from pentanal (0.3mmol), 2,2-dimethyl-1,3-dioxane-4,6-dione (0.4 mmol) and 2-(dimethyl(oxo)- $\lambda^6$ -sulfaneylidene)-1-(*p*-tolyl)ethan-1-one (0.2 mmol). The crude residue was purified by flash chromatography to give the product. (95%)

$^1\text{H}$  NMR (500 MHz,  $\text{CDCl}_3$ )  $\delta$  7.81 (d,  $J = 8.3$  Hz, 2H), 7.24 (d,  $J = 8.0$  Hz, 2H), 3.63 (d,  $J = 9.1$  Hz, 1H), 2.88 (td,  $J = 8.7, 6.1$  Hz, 1H), 2.39 (s, 3H), 1.88 (dq,  $J = 13.9, 7.2$  Hz, 1H), 1.79 (d,  $J = 12.7$  Hz, 6H), 1.77 – 1.70 (m, 1H), 1.49 (t,  $J = 7.7$  Hz, 2H), 1.40 (dddd,  $J = 15.0, 12.2, 7.3, 2.8$  Hz, 2H), 0.91 (t,  $J = 7.2$  Hz, 3H).

$^{13}\text{C}$  NMR (126 MHz,  $\text{CDCl}_3$ )  $\delta$  190.4, 165.3, 165.0, 145.0, 133.7, 129.7, 128.5, 105.4, 43.9, 42.0, 35.9, 30.8, 27.7, 27.7, 26.2, 22.3, 21.9, 14.1.

HRMS (ESI):  $m/z$  calcd for  $[\text{C}_{21}\text{H}_{24}\text{O}_5 + \text{Na}]^+$  367.1516; found: 367.1520

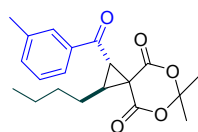

##### ***trans*-1-Butyl-6,6-dimethyl-2-(3-methylbenzoyl)-5,7-dioxaspiro[2.5]octane-4,8-dione (5c'c)**

The title compound was prepared from pentanal (0.3mmol), 2,2-dimethyl-1,3-dioxane-4,6-dione (0.4 mmol) and 2-(dimethyl(oxo)- $\lambda^6$ -sulfaneylidene)-1-(*m*-tolyl)ethan-1-one (0.2 mmol). The crude residue was purified by flash chromatography to give the product. (98%).

$^1\text{H}$  NMR (500 MHz,  $\text{CDCl}_3$ )  $\delta$  7.74 (s, 1H), 7.69 (d,  $J = 7.5$  Hz, 1H), 7.40 – 7.30 (m, 2H), 3.64 (d,  $J = 9.1$  Hz, 1H), 2.89 (td,  $J = 8.7, 6.1$  Hz, 1H), 2.38 (s, 3H), 1.88 (dq,  $J = 14.0, 7.6, 7.0$  Hz, 1H), 1.79 (d,  $J = 13.4$  Hz, 6H), 1.74 (dd,  $J = 14.4, 7.5$  Hz, 1H), 1.49 (p,  $J = 6.9$  Hz, 2H), 1.45 – 1.35 (m, 2H), 0.91 (t,  $J = 7.2$  Hz, 3H).

$^{13}\text{C}$  NMR (126 MHz,  $\text{CDCl}_3$ )  $\delta$  191.0, 165.4, 165.0, 138.9, 136.1, 134.8, 128.9, 128.8, 125.7, 105.5, 43.9, 42.0, 35.9, 30.8, 27.8, 27.7, 26.2, 22.3, 21.5, 14.1.

HRMS (ESI):  $m/z$  calcd for  $[\text{C}_{21}\text{H}_{24}\text{O}_5 + \text{Na}]^+$  367.1516; found: 367.1518

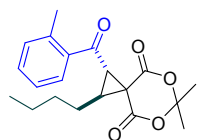

##### ***trans*-1-Butyl-6,6-dimethyl-2-(2-methylbenzoyl)-5,7-dioxaspiro[2.5]octane-4,8-dione (5c'd)**

The title compound was prepared from pentanal (0.3mmol), 2,2-dimethyl-1,3-dioxane-4,6-dione (0.4 mmol) and 2-(dimethyl(oxo)- $\lambda^6$ -sulfaneylidene)-1-(*o*-tolyl)ethan-1-one (0.2 mmol). The crude residue was purified by flash chromatography to give the product. (97%).

**<sup>1</sup>H NMR (500 MHz, CDCl<sub>3</sub>)**  $\delta$  7.70 (d, *J* = 6.7 Hz, 1H), 7.37 (t, *J* = 6.8 Hz, 1H), 7.23 (dt, *J* = 7.6, 3.6 Hz, 2H), 3.66 (d, *J* = 9.1 Hz, 1H), 2.80 (td, *J* = 8.8, 6.3 Hz, 1H), 2.55 (s, 3H), 1.85 (td, *J* = 14.3, 6.3 Hz, 1H), 1.80 – 1.70 (m, 7H), 1.51 – 1.33 (m, 4H), 0.89 (t, *J* = 7.2 Hz, 3H).

**<sup>13</sup>C NMR (126 MHz, CDCl<sub>3</sub>)**  $\delta$  193.2, 165.9, 165.0, 140.8, 135.5, 132.7, 132.6, 129.6, 125.9, 105.5, 45.9, 43.1, 35.7, 30.8, 27.8, 27.7, 26.3, 22.3, 21.9, 14.1.

**HRMS (ESI):** *m/z* calcd for [C<sub>21</sub>H<sub>24</sub>O<sub>5</sub> + Na]<sup>+</sup> 367.1516; found: 367.1515

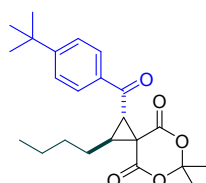

***trans*-1-Butyl-2-(4-(tert-butyl)benzoyl)-6,6-dimethyl-5,7-dioxaspiro[2.5]octane-4,8-dione (5c'e)**

The title compound was prepared from pentanal (0.3mmol), 2,2-dimethyl-1,3-dioxane-4,6-dione (0.4 mmol) and 1-(4-(tert-butyl)phenyl)-2-(dimethyl(oxo)- $\lambda^6$ -sulfaneylidene) ethan-1-one (0.2 mmol). The crude residue was purified by flash chromatography to give the product. (98%).

**<sup>1</sup>H NMR (500 MHz, CDCl<sub>3</sub>)**  $\delta$  7.86 (d, *J* = 8.5 Hz, 2H), 7.47 (d, *J* = 8.5 Hz, 2H), 3.63 (d, *J* = 9.1 Hz, 1H), 2.90 (td, *J* = 8.7, 6.1 Hz, 1H), 1.89 (dq, *J* = 13.9, 7.2 Hz, 1H), 1.84 – 1.72 (m, 7H), 1.49 (p, *J* = 7.4 Hz, 2H), 1.45 – 1.36 (m, 2H), 1.32 (s, 9H), 0.91 (t, *J* = 7.2 Hz, 3H).

**<sup>13</sup>C NMR (126 MHz, CDCl<sub>3</sub>)**  $\delta$  190.5, 165.4, 165.0, 157.8, 133.6, 128.4, 126.0, 105.5, 44.0, 42.0, 35.9, 35.4, 31.2, 30.8, 27.8, 27.7, 26.2, 22.3, 14.1.

**HRMS (ESI):** *m/z* calcd for [C<sub>23</sub>H<sub>30</sub>O<sub>5</sub> + Na]<sup>+</sup> 409.1985; found: 409.1987

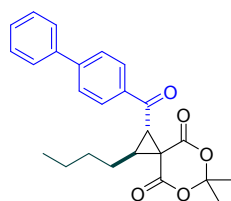

***trans*-1-([1,1'-Biphenyl]-4-carbonyl)-2-butyl-6,6-dimethyl-5,7-dioxaspiro[2.5]octane-4,8-dione (5c'f)**

The title compound was prepared from pentanal (0.3mmol), 2,2-dimethyl-1,3-dioxane-4,6-dione (0.4 mmol) and 1-([1,1'-biphenyl]-4-yl)-2-(dimethyl(oxo)- $\lambda^6$ -sulfaneylidene) ethan-1-one (0.2 mmol). The crude residue was purified by flash chromatography to give the product. (94%).

**<sup>1</sup>H NMR (500 MHz, CDCl<sub>3</sub>)**  $\delta$  8.00 (d, *J* = 8.4 Hz, 2H), 7.68 (d, *J* = 8.4 Hz, 2H), 7.61 (d, *J* = 7.0 Hz, 2H), 7.47 (t, *J* = 7.5 Hz, 2H), 7.40 (t, *J* = 7.3 Hz, 1H), 3.70 (d, *J* = 9.1 Hz, 1H), 2.93 (td, *J* = 8.7, 6.1 Hz, 1H), 1.91 (td, *J* = 13.7, 7.5 Hz, 1H), 1.85 – 1.73 (m, 7H), 1.56 – 1.49 (m, 2H), 1.48 – 1.39 (m, 2H), 0.93 (t, *J* = 7.2 Hz, 3H).

**<sup>13</sup>C NMR (126 MHz, CDCl<sub>3</sub>)**  $\delta$  190.5, 165.4, 165.0, 146.7, 139.9, 134.8, 129.2, 129.0, 128.6, 127.7, 127.5, 105.6, 43.8, 42.0, 36.0, 30.8, 27.8, 27.7, 26.2, 22.3, 14.1.

**HRMS (ESI):** *m/z* calcd for [C<sub>25</sub>H<sub>26</sub>O<sub>5</sub> + Na]<sup>+</sup> 429.1672; found: 429.1678

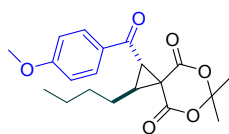

***trans*-1-Butyl-2-(4-methoxybenzoyl)-6,6-dimethyl-5,7-dioxaspiro[2.5]octane-4,8-dione (5c'g)**

The title compound was prepared from pentanal (0.3mmol), 2,2-dimethyl-1,3-dioxane-4,6-dione (0.4 mmol) and 2-(dimethyl(oxo)- $\lambda^6$ -sulfaneylidene)-1-(4-methoxyphenyl)ethan-1-one (0.2 mmol). The crude residue was purified by flash chromatography to give the product. (96%).

**<sup>1</sup>H NMR (500 MHz, CDCl<sub>3</sub>)**  $\delta$  7.85 (d, *J* = 8.9 Hz, 2H), 6.88 (d, *J* = 8.9 Hz, 2H), 3.79 (s, 3H), 3.57 (d, *J* = 9.2 Hz, 1H), 2.84 (td, *J* = 8.7, 6.2 Hz, 1H), 1.85 (dq, *J* = 14.0, 7.6, 7.1 Hz, 1H), 1.80 – 1.67 (m, 7H), 1.45 (tdd, *J* = 9.0, 7.2, 4.1 Hz, 2H), 1.37 (dddd, *J* = 10.9, 8.0, 6.9, 4.2 Hz, 2H), 0.87 (t, *J* = 7.2 Hz, 3H).

**<sup>13</sup>C NMR (126 MHz, CDCl<sub>3</sub>)**  $\delta$  189.1, 165.2, 164.9, 164.0, 130.5, 129.1, 114.1, 105.3, 55.5, 43.9, 41.9, 35.7, 30.6, 27.6, 27.5, 26.0, 22.1, 13.9.

**HRMS (ESI):** *m/z* calcd for [C<sub>20</sub>H<sub>24</sub>O<sub>6</sub> + Na]<sup>+</sup> 383.1465; found: 383.1468

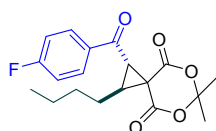

***trans*-1-Butyl-2-(4-fluorobenzoyl)-6,6-dimethyl-5,7-dioxaspiro[2.5]octane-4,8-dione (5c'h)**

The title compound was prepared from pentanal (0.3mmol), 2,2-dimethyl-1,3-dioxane-4,6-dione (0.4 mmol) and 2-(dimethyl(oxo)- $\lambda^6$ -sulfaneylidene)-1-(4-fluorophenyl) ethan-1-one (0.2 mmol). The crude residue was purified by flash chromatography to give the product. (96%).

**<sup>1</sup>H NMR (500 MHz, CDCl<sub>3</sub>)**  $\delta$  7.92 (dd, *J* = 8.9, 5.3 Hz, 2H), 7.11 (t, *J* = 8.6 Hz, 2H), 3.60 (d, *J* = 9.0 Hz, 1H), 2.85 (td, *J* = 8.8, 5.9 Hz, 1H), 1.86 (dq, *J* = 13.8, 7.4 Hz, 1H), 1.78 (d, *J* = 15.4 Hz, 6H), 1.74 – 1.65 (m, 1H), 1.48 (p, *J* = 7.1 Hz, 2H), 1.39 (dtd, *J* = 10.0, 8.0, 7.3, 5.1 Hz, 2H), 0.89 (t, *J* = 7.2 Hz, 3H).

**<sup>13</sup>C NMR (126 MHz, CDCl<sub>3</sub>)**  $\delta$  189.3, 166.2 (d, *J* = 255.9 Hz), 165.3, 164.7, 132.6 (d, *J* = 2.8 Hz), 131.0 (d, *J* = 9.5 Hz), 116.2 (d, *J* = 22.1 Hz), 105.5, 43.2, 41.8, 36.0, 30.7, 27.6 (d, *J* = 9.1 Hz), 26.1, 22.2, 14.0.

**<sup>19</sup>F NMR (471 MHz, Chloroform-*d*)**  $\delta$  -103.71.

**HRMS (ESI):** *m/z* calcd for [C<sub>19</sub>H<sub>21</sub>FO<sub>5</sub> + Na]<sup>+</sup> 371.1265; found: 371.1266

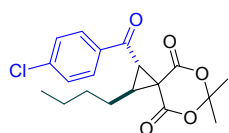

***trans*-1-Butyl-2-(4-chlorobenzoyl)-6,6-dimethyl-5,7-dioxaspiro[2.5]octane-4,8-dione (5c'i)**

The title compound was prepared from pentanal (0.3mmol), 2,2-dimethyl-1,3-dioxane-4,6-dione (0.4 mmol) and 1-(4-chlorophenyl)-2-(dimethyl(oxo)- $\lambda^6$ -sulfaneylidene)ethan-1-one (0.2 mmol). The crude residue was purified by flash chromatography to give the product as a white solid. (92%, Mp. 129-138 °C).

**<sup>1</sup>H NMR (500 MHz, CDCl<sub>3</sub>)** δ 7.85 (d, J = 8.6 Hz, 2H), 7.43 (d, J = 8.6 Hz, 2H), 3.61 (d, J = 9.0 Hz, 1H), 2.86 (td, J = 8.8, 5.9 Hz, 1H), 1.87 (td, J = 13.6, 6.7 Hz, 1H), 1.80 (d, J = 14.1 Hz, 6H), 1.75 – 1.67 (m, 1H), 1.50 (dt, J = 14.5, 7.1 Hz, 2H), 1.41 (ddt, J = 14.0, 7.2, 4.9 Hz, 2H), 0.91 (t, J = 7.2 Hz, 3H).

**<sup>13</sup>C NMR (126 MHz, CDCl<sub>3</sub>)** δ 189.9, 165.3, 164.8, 140.5, 134.5, 129.8, 129.5, 105.7, 43.2, 41.8, 36.1, 30.8, 27.8, 27.7, 26.2, 22.3, 14.1.

**HRMS (ESI):** m/z calcd for [C<sub>19</sub>H<sub>21</sub>ClO<sub>5</sub> + Na]<sup>+</sup> 387.0969; found: 387.0976

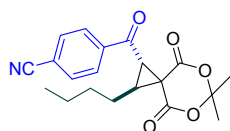

**4-(*trans*-2-Butyl-6,6-dimethyl-4,8-dioxo-5,7-dioxaspiro[2.5]octane-1-carbonyl)benzonitrile (5c'j)**

The title compound was prepared from pentanal (0.3mmol), 2,2-dimethyl-1,3-dioxane-4,6-dione (0.4 mmol) and 4-(2-(dimethyl(oxo)-λ<sup>6</sup>-sulfaneylidene)acetyl)benzonitrile (0.2 mmol). The crude residue was purified by flash chromatography to give the product as a white solid. (93%, Mp. 149-153 °C).

**<sup>1</sup>H NMR (500 MHz, CDCl<sub>3</sub>)** δ 8.00 (d, J = 8.5 Hz, 2H), 7.77 (d, J = 8.4 Hz, 2H), 3.63 (d, J = 8.9 Hz, 1H), 2.85 (td, J = 8.9, 5.6 Hz, 1H), 1.92 – 1.77 (m, 7H), 1.74 – 1.64 (m, 1H), 1.50 (q, J = 6.9 Hz, 2H), 1.42 (p, J = 6.6 Hz, 2H), 0.92 (t, J = 7.2 Hz, 3H).

**<sup>13</sup>C NMR (126 MHz, CDCl<sub>3</sub>)** δ 190.0, 165.4, 164.4, 139.1, 133.0, 128.7, 118.0, 117.1, 105.9, 42.4, 41.6, 36.4, 30.7, 27.8, 27.7, 26.1, 22.3, 14.1.

**HRMS (ESI):** m/z calcd for [C<sub>20</sub>H<sub>21</sub>NO<sub>5</sub> + Na]<sup>+</sup> 378.1311; found: 378.1316

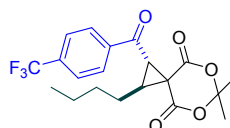

***trans*-1-Butyl-6,6-dimethyl-2-(4-(trifluoromethyl)benzoyl)-5,7-dioxaspiro[2.5]octane-4,8-dione (5c'k)**

The title compound was prepared from pentanal (0.3mmol), 2,2-dimethyl-1,3-dioxane-4,6-dione (0.4 mmol) and 2-(dimethyl(oxo)-λ<sup>6</sup>-sulfaneylidene)-1-(4-(trifluoromethyl)phenyl)ethan-1-one (0.2 mmol). The crude residue was purified by flash chromatography to give the product. (87%).

**<sup>1</sup>H NMR (500 MHz, CDCl<sub>3</sub>)** δ 8.00 (d, J = 8.1 Hz, 2H), 7.70 (d, J = 8.2 Hz, 2H), 3.64 (d, J = 8.9 Hz, 1H), 2.85 (td, J = 8.9, 5.7 Hz, 1H), 1.86 (td, J = 13.6, 7.1 Hz, 1H), 1.78 (d, J = 20.5 Hz, 6H), 1.74 – 1.64 (m, 1H), 1.49 (p, J = 7.2 Hz, 2H), 1.45 – 1.33 (m, 2H), 0.90 (t, J = 7.3 Hz, 3H).

**<sup>13</sup>C NMR (126 MHz, CDCl<sub>3</sub>)** δ 190.2, 165.4, 164.5, 138.8, 134.9 (q, J = 32.7 Hz), 128.6, 126.1 (q, J = 3.7 Hz), 123.6 (q, J = 272.8 Hz), 105.7, 42.7, 41.6, 36.2, 30.7, 27.6, 27.6, 26.1, 22.2, 14.0.

**<sup>19</sup>F NMR (471 MHz, Chloroform-*d*)** δ -63.19.

**HRMS (ESI):** m/z calcd for [C<sub>20</sub>H<sub>21</sub>F<sub>3</sub>O<sub>5</sub> + Na]<sup>+</sup> 421.1233; found: 421.1236

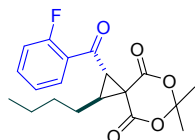

***trans*-1-Butyl-2-(2-fluorobenzoyl)-6,6-dimethyl-5,7-dioxaspiro[2.5]octane-4,8-dione (5c'l)**

The title compound was prepared from pentanal (0.3mmol), 2,2-dimethyl-1,3-dioxane-4,6-dione (0.4 mmol) and 2-(dimethyl(oxo)- $\lambda^6$ -sulfaneylidene)-1-(2-fluorophenyl) ethan-1-one (0.2 mmol). The crude residue was purified by flash chromatography to give the product. (95%).

**$^1\text{H}$  NMR (500 MHz,  $\text{CDCl}_3$ )**  $\delta$  7.96 (t,  $J = 7.7$  Hz, 1H), 7.53 (q,  $J = 7.2$  Hz, 1H), 7.29 – 7.18 (m, 1H), 7.11 (dd,  $J = 11.5, 7.6$  Hz, 1H), 3.60 (dd,  $J = 9.1, 3.3$  Hz, 1H), 2.89 (q,  $J = 7.5, 6.5$  Hz, 1H), 1.88 – 1.69 (m, 8H), 1.46 (q,  $J = 6.9$  Hz, 2H), 1.43 – 1.35 (m, 2H), 0.90 (t,  $J = 7.2$  Hz, 3H).

**$^{13}\text{C}$  NMR (126 MHz,  $\text{CDCl}_3$ )**  $\delta$  188.6, 188.6, 166.1, 164.7, 162.6 (d,  $J = 254.7$  Hz), 135.6 (d,  $J = 9.3$  Hz), 131.3 (d,  $J = 2.2$  Hz), 125.0 (d,  $J = 3.2$  Hz), 124.5 (d,  $J = 11.8$  Hz), 116.9 (d,  $J = 23.7$  Hz), 105.4, 47.3 (d,  $J = 4.9$  Hz), 42.1, 42.1, 36.0 (d,  $J = 5.5$  Hz), 30.8, 27.8 (d,  $J = 8.9$  Hz), 26.1, 22.3, 14.1.

**$^{19}\text{F}$  NMR (471 MHz, Chloroform-*d*)**  $\delta$  -109.89.

**HRMS (ESI):**  $m/z$  calcd for  $[\text{C}_{19}\text{H}_{21}\text{FO}_5 + \text{Na}]^+$  371.1265; found: 371.1267

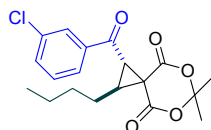

***trans*-1-Butyl-2-(3-chlorobenzoyl)-6,6-dimethyl-5,7-dioxaspiro[2.5]octane-4,8-dione (5c'm)**

The title compound was prepared from pentanal (0.3mmol), 2,2-dimethyl-1,3-dioxane-4,6-dione (0.4 mmol) and 1-(3-chlorophenyl)-2-(dimethyl(oxo)- $\lambda^6$ -sulfaneylidene) ethan-1-one (0.2 mmol). The crude residue was purified by flash chromatography to give the product. (97%).

**$^1\text{H}$  NMR (500 MHz,  $\text{CDCl}_3$ )**  $\delta$  7.91 (s, 1H), 7.76 (d,  $J = 7.8$  Hz, 1H), 7.55 (d,  $J = 8.1$  Hz, 1H), 7.41 (t,  $J = 7.9$  Hz, 1H), 3.61 (d,  $J = 9.0$  Hz, 1H), 2.87 (td,  $J = 8.8, 5.9$  Hz, 1H), 1.88 (td,  $J = 13.5, 7.4$  Hz, 1H), 1.81 (d,  $J = 11.7$  Hz, 6H), 1.77 – 1.68 (m, 1H), 1.55 – 1.46 (m, 2H), 1.41 (ddt,  $J = 14.3, 7.3, 4.9$  Hz, 2H), 0.92 (t,  $J = 7.3$  Hz, 3H).

**$^{13}\text{C}$  NMR (126 MHz,  $\text{CDCl}_3$ )**  $\delta$  189.9, 165.4, 164.7, 137.7, 135.5, 134.0, 130.4, 128.5, 126.5, 105.7, 43.1, 41.8, 36.1, 30.8, 27.8, 27.8, 26.2, 22.4, 14.1.

**HRMS (ESI):**  $m/z$  calcd for  $[\text{C}_{19}\text{H}_{21}\text{ClO}_5 + \text{Na}]^+$  387.0969; found: 387.0971

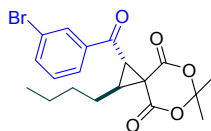

***trans*-1-(3-Bromobenzoyl)-2-butyl-6,6-dimethyl-5,7-dioxaspiro[2.5]octane-4,8-dione (5c'n)**

The title compound was prepared from pentanal (0.3mmol), 2,2-dimethyl-1,3-dioxane-4,6-dione (0.4 mmol) and 1-(3-bromophenyl)-2-(dimethyl(oxo)- $\lambda^6$ -sulfaneylidene)ethan-1-one (0.2 mmol). The crude residue was purified by flash chromatography to give the product. (98%).

**$^1\text{H}$  NMR (500 MHz,  $\text{CDCl}_3$ )**  $\delta$  8.03 (s, 1H), 7.78 (d,  $J = 7.8$  Hz, 1H), 7.66 (d,  $J = 9.6$  Hz, 1H), 7.31 (t,  $J = 7.9$  Hz, 1H), 3.58 (d,  $J = 9.0$  Hz, 1H), 2.84 (td,  $J = 8.8, 5.9$  Hz, 1H), 1.84 (dt,  $J = 13.8,$

7.0 Hz, 1H), 1.77 (d, J = 12.8 Hz, 6H), 1.74 – 1.64 (m, 1H), 1.48 (p, J = 8.1, 7.3 Hz, 2H), 1.43 – 1.33 (m, 2H), 0.89 (t, J = 7.2 Hz, 3H).

**<sup>13</sup>C NMR (126 MHz, CDCl<sub>3</sub>)** δ 189.7, 165.3, 164.5, 137.7, 136.7, 131.2, 130.6, 126.8, 123.3, 105.6, 42.9, 41.7, 36.0, 30.7, 27.7, 27.6, 26.0, 22.2, 14.0.

**HRMS (ESI):** m/z calcd for [C<sub>19</sub>H<sub>21</sub>BrO<sub>5</sub> + Na]<sup>+</sup> 431.0464; found: 431.0468

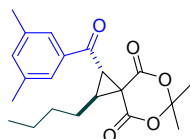

***trans*-1-Butyl-2-(3,5-dimethylbenzoyl)-6,6-dimethyl-5,7-dioxaspiro[2.5]octane-4,8-dione (5c'o)**

The title compound was prepared from pentanal (0.3mmol), 2,2-dimethyl-1,3-dioxane-4,6-dione (0.4 mmol) and 2-(dimethyl(oxo)-λ<sup>6</sup>-sulfaneylidene)-1-(3,5-dimethylphenyl) ethan-1-one (0.2 mmol). The crude residue was purified by flash chromatography to give the product. (86%).

**<sup>1</sup>H NMR (500 MHz, CDCl<sub>3</sub>)** δ 7.51 (s, 2H), 7.19 (s, 1H), 3.62 (d, J = 9.1 Hz, 1H), 2.88 (td, J = 8.7, 6.1 Hz, 1H), 2.33 (s, 6H), 1.88 (h, J = 7.7, 7.1 Hz, 1H), 1.79 (d, J = 11.7 Hz, 7H), 1.48 (q, J = 8.2, 7.3 Hz, 2H), 1.45 – 1.35 (m, 2H), 0.91 (t, J = 7.2 Hz, 3H).

**<sup>13</sup>C NMR (126 MHz, CDCl<sub>3</sub>)** δ 191.1, 165.3, 165.0, 138.6, 136.1, 135.7, 126.2, 105.4, 44.1, 42.0, 35.7, 30.8, 27.7, 27.6, 26.1, 22.3, 21.4, 14.0.

**HRMS (ESI):** m/z calcd for [C<sub>21</sub>H<sub>26</sub>O<sub>5</sub> + Na]<sup>+</sup> 381.1672; found: 381.1675

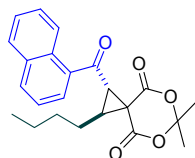

***trans*-1-(1-Naphthoyl)-2-butyl-6,6-dimethyl-5,7-dioxaspiro[2.5]octane-4,8-dione (5c'p)**

The title compound was prepared from pentanal (0.3mmol), 2,2-dimethyl-1,3-dioxane-4,6-dione (0.4 mmol) and 2-(dimethyl(oxo)-λ<sup>6</sup>-sulfaneylidene)-1-(naphthalen-1-yl)ethan-1-one (0.2 mmol). The crude residue was purified by flash chromatography to give the product. (92%).

**<sup>1</sup>H NMR (500 MHz, CDCl<sub>3</sub>)** δ 8.94 (d, J = 8.6 Hz, 1H), 8.02 – 7.96 (m, 2H), 7.83 (d, J = 8.3 Hz, 1H), 7.61 (t, J = 7.8 Hz, 1H), 7.54 – 7.49 (m, 1H), 7.46 (t, J = 7.7 Hz, 1H), 3.85 (d, J = 9.1 Hz, 1H), 2.96 – 2.87 (m, 1H), 1.88 (ddt, J = 36.3, 14.5, 7.1 Hz, 2H), 1.75 (d, J = 13.8 Hz, 6H), 1.55 – 1.37 (m, 4H), 0.92 (t, J = 7.2 Hz, 3H).

**<sup>13</sup>C NMR (126 MHz, CDCl<sub>3</sub>)** δ 193.3, 165.9, 165.0, 134.3, 134.2, 133.3, 130.7, 129.5, 128.7, 128.4, 126.8, 126.5, 124.2, 105.5, 46.1, 43.1, 35.8, 30.7, 27.7, 27.6, 26.2, 22.3, 14.0.

**HRMS (ESI):** m/z calcd for [C<sub>23</sub>H<sub>24</sub>O<sub>5</sub> + Na]<sup>+</sup> 403.1516; found: 403.1520

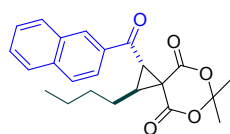

***trans*-1-(2-Naphthoyl)-2-butyl-6,6-dimethyl-5,7-dioxaspiro[2.5]octane-4,8-dione (5c'q)**



The title compound was prepared from pentanal (0.3mmol), 2,2-dimethyl-1,3-dioxane-4,6-dione (0.4 mmol ) and 2-(dimethyl(oxo)- $\lambda^6$ -sulfaneylidene)-1-(naphthalen-2-yl)ethan-1-one (0.2 mmol). The crude residue was purified by flash chromatography to give the product. (95%).

**<sup>1</sup>H NMR (500 MHz, CDCl<sub>3</sub>)**  $\delta$  8.42 (s, 1H), 7.99 (d, J = 10.4 Hz, 1H), 7.93 (d, J = 8.2 Hz, 1H), 7.86 (dd, J = 15.5, 8.4 Hz, 2H), 7.56 (dt, J = 27.6, 7.3 Hz, 2H), 3.80 (d, J = 9.0 Hz, 1H), 3.01 – 2.92 (m, 1H), 1.93 (dq, J = 14.0, 7.0 Hz, 1H), 1.79 (d, J = 20.3 Hz, 7H), 1.53 (q, J = 7.9, 7.3 Hz, 2H), 1.43 (qd, J = 7.1, 2.3 Hz, 2H), 0.93 (t, J = 7.2 Hz, 3H).

**<sup>13</sup>C NMR (126 MHz, CDCl<sub>3</sub>)**  $\delta$  190.8, 165.3, 164.9, 136.0, 133.5, 132.5, 130.2, 129.8, 129.0, 128.9, 128.0, 127.0, 123.7, 105.5, 43.8, 42.0, 36.0, 30.7, 27.7, 27.6, 26.2, 22.3, 14.0.

**HRMS (ESI):** m/z calcd for [C<sub>23</sub>H<sub>24</sub>O<sub>5</sub> + Na]<sup>+</sup> 403.1516; found: 403.1519

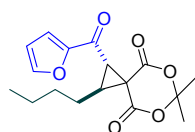

***trans*-1-Butyl-2-(furan-2-carbonyl)-6,6-dimethyl-5,7-dioxaspiro[2.5]octane-4,8-dione (5c'r)**

The title compound was prepared from pentanal (0.3mmol), 2,2-dimethyl-1,3-dioxane-4,6-dione (0.4 mmol) and 2-(dimethyl(oxo)- $\lambda^6$ -sulfaneylidene)-1-(furan-2-yl)ethan-1-one (0.2 mmol). The crude residue was purified by flash chromatography to give the product. (94%).

**<sup>1</sup>H NMR (500 MHz, CDCl<sub>3</sub>)**  $\delta$  7.54 (s, 1H), 7.18 (d, J = 3.7 Hz, 1H), 6.51 (dd, J = 3.7, 1.7 Hz, 1H), 3.47 (d, J = 9.2 Hz, 1H), 2.84 (td, J = 8.7, 6.1 Hz, 1H), 1.85 – 1.66 (m, 8H), 1.48 – 1.40 (m, 2H), 1.36 (pd, J = 7.1, 2.5 Hz, 2H), 0.87 (t, J = 7.2 Hz, 3H).

**<sup>13</sup>C NMR (126 MHz, CDCl<sub>3</sub>)**  $\delta$  179.5, 165.5, 164.7, 152.3, 147.0, 118.0, 112.7, 105.4, 43.5, 41.1, 35.2, 30.7, 27.6, 25.9, 22.2, 13.9.

**HRMS (ESI):** m/z calcd for [C<sub>17</sub>H<sub>20</sub>O<sub>6</sub> + Na]<sup>+</sup> 343.1152; found: 343.1152

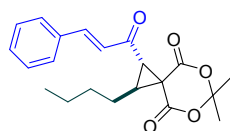

***trans*-1-Butyl-2-cinnamoyl-6,6-dimethyl-5,7-dioxaspiro[2.5]octane-4,8-dione (5c's)**

The title compound was prepared from pentanal (0.3mmol), 2,2-dimethyl-1,3-dioxane-4,6-dione (0.4 mmol) and 1-(dimethyl(oxo)- $\lambda^6$ -sulfaneylidene)-4-phenylbut-3-en-2-one (0.2 mmol). The crude residue was purified by flash chromatography to give the product. (91%).

**<sup>1</sup>H NMR (500 MHz, CDCl<sub>3</sub>)**  $\delta$  7.58 – 7.51 (m, 3H), 7.40 (dd, J = 5.1, 2.0 Hz, 3H), 6.81 (d, J = 16.2 Hz, 1H), 3.40 (d, J = 9.2 Hz, 1H), 2.86 (td, J = 8.8, 6.1 Hz, 1H), 1.90 – 1.80 (m, 7H), 1.79 – 1.71 (m, 1H), 1.49 (p, J = 7.3 Hz, 2H), 1.45 – 1.36 (m, 2H), 0.92 (t, J = 7.2 Hz, 3H).

**<sup>13</sup>C NMR (126 MHz, CDCl<sub>3</sub>)**  $\delta$  190.8, 165.6, 165.1, 144.8, 134.2, 131.2, 129.2, 128.8, 125.9, 105.5, 45.1, 41.9, 35.5, 30.9, 27.8, 27.8, 26.2, 22.4, 14.1.

**HRMS (ESI):** m/z calcd for [C<sub>21</sub>H<sub>24</sub>O<sub>5</sub> + Na]<sup>+</sup> 379.1516; found: 379.1524

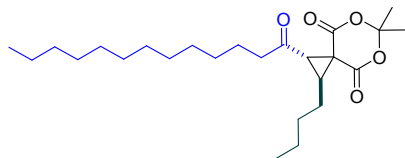

***trans*-1-Butyl-6,6-dimethyl-2-tridecanoyl-5,7-dioxaspiro[2.5]octane-4,8-dione (5c't)**

The title compound was prepared from pentanal (0.3mmol), 2,2-dimethyl-1,3-dioxane-4,6-dione (0.4 mmol) and tridecanal (0.2 mmol). The crude residue was purified by flash chromatography to give the product. (93%).

**<sup>1</sup>H NMR (500 MHz, CDCl<sub>3</sub>)** δ 2.99 (d, J = 9.2 Hz, 1H), 2.66 (td, J = 8.9, 5.8 Hz, 1H), 2.52 (dt, J = 17.5, 7.4 Hz, 1H), 2.41 (dt, J = 17.5, 7.4 Hz, 1H), 1.78 – 1.69 (m, 7H), 1.62 (dt, J = 13.6, 7.0 Hz, 1H), 1.44 – 1.27 (m, 5H), 1.21 (d, J = 13.2 Hz, 18H), 0.84 (dt, J = 18.6, 7.2 Hz, 7H).

**<sup>13</sup>C NMR (126 MHz, CDCl<sub>3</sub>)** δ 201.7, 166.0, 164.8, 105.4, 46.4, 42.7, 41.9, 34.9, 32.0, 30.8, 29.7, 29.5, 29.5, 29.4, 29.1, 27.7, 27.6, 26.0, 23.4, 22.8, 22.3, 14.2, 14.0.

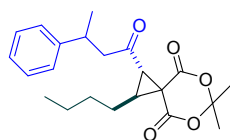

***trans*-1-Butyl-6,6-dimethyl-2-(3-phenylbutanoyl)-5,7-dioxaspiro[2.5]octane-4,8-dione (5c'u)**

The title compound was prepared from pentanal (0.3mmol), 2,2-dimethyl-1,3-dioxane-4,6-dione (0.4 mmol) and 1-(dimethyl(oxo)-λ<sup>6</sup>-sulfaneylidene)-4-phenylpentan-2-one (0.2 mmol). The crude residue was purified by flash chromatography to give the product. (87%).

**<sup>1</sup>H NMR (500 MHz, CDCl<sub>3</sub>)** δ 7.45 – 7.10 (m, 5H), 3.50 (dd, J = 9.2, 5.7 Hz, 1H), 3.00 (d, J = 9.2 Hz, 1H), 2.61 (td, J = 8.8, 5.8 Hz, 1H), 2.11 (td, J = 14.1, 13.7, 6.5 Hz, 1H), 1.92 – 1.68 (m, 7H), 1.68 – 1.56 (m, 1H), 1.45 (ddd, J = 15.6, 13.7, 7.4 Hz, 1H), 1.39 – 1.17 (m, 4H), 0.99 – 0.69 (m, 6H).

**<sup>13</sup>C NMR (126 MHz, CDCl<sub>3</sub>)** δ 190.9, 165.4, 165.1, 136.2, 133.6, 132.6, 130.4, 130.0, 129.1, 129.1, 128.1, 127.2, 123.9, 105.6, 43.9, 42.1, 36.1, 30.9, 27.8, 26.3, 22.4, 14.1.

**HRMS (ESI):** m/z calcd for [C<sub>22</sub>H<sub>28</sub>O<sub>5</sub> + Na]<sup>+</sup> 395.1829; found: 395.1827

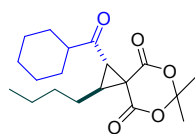

***trans*-1-Butyl-2-(cyclohexanecarbonyl)-6,6-dimethyl-5,7-dioxaspiro[2.5]octane-4,8-dione (5c'v)**

The title compound was prepared from pentanal (0.3mmol), 2,2-dimethyl-1,3-dioxane-4,6-dione (0.4 mmol) and 1-cyclohexyl-2-(dimethyl(oxo)-λ<sup>6</sup>-sulfaneylidene)ethan-1-one (0.2 mmol). The crude residue was purified by flash chromatography to give the product. (89%).

**<sup>1</sup>H NMR (500 MHz, CDCl<sub>3</sub>)** δ 3.11 (d, J = 9.3 Hz, 1H), 2.76 – 2.66 (m, 1H), 2.41 (tt, J = 11.3, 3.5 Hz, 1H), 1.94 – 1.83 (m, 2H), 1.76 (t, J = 9.8 Hz, 9H), 1.68 – 1.57 (m, 2H), 1.43 – 1.11 (m, 9H), 0.87 (t, J = 7.1 Hz, 3H).

**<sup>13</sup>C NMR (126 MHz, CDCl<sub>3</sub>)** δ 204.3, 166.0, 164.8, 105.3, 50.3, 45.0, 41.6, 35.0, 30.6, 28.2, 27.9, 27.6, 27.5, 25.9, 25.8, 25.6, 25.5, 22.1, 13.9.

**HRMS** (ESI):  $m/z$  calcd for  $[C_{19}H_{28}O_5 + Na]^+$  359.1829; found: 359.1832

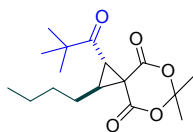

***trans*-1-Butyl-6,6-dimethyl-2-pivaloyl-5,7-dioxaspiro[2.5]octane-4,8-dione (5c'w)**

The title compound was prepared from pentanal (0.3mmol), 2,2-dimethyl-1,3-dioxane-4,6-dione (0.4 mmol) and 1-(dimethyl(oxo)- $\lambda^6$ -sulfaneylidene)-3,3-dimethylbutan-2-one (0.2 mmol). The crude residue was purified by flash chromatography to give the product. (95%).

**$^1H$  NMR (500 MHz,  $CDCl_3$ )**  $\delta$  3.21 (d,  $J = 9.1$  Hz, 1H), 2.76 (td,  $J = 8.7, 6.1$  Hz, 1H), 1.77 (d,  $J = 2.6$  Hz, 7H), 1.66 – 1.54 (m, 1H), 1.43 – 1.28 (m, 4H), 1.14 (s, 9H), 0.86 (t,  $J = 7.2$  Hz, 3H).

**$^{13}C$  NMR (126 MHz,  $CDCl_3$ )**  $\delta$  206.2, 165.8, 164.9, 105.3, 44.8, 43.1, 41.1, 35.9, 30.7, 27.7, 27.6, 26.5, 26.0, 22.2, 14.0.

**HRMS** (ESI):  $m/z$  calcd for  $[C_{17}H_{26}O_5 + Na]^+$  333.1672; found: 333.1676

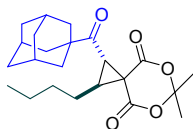

***trans*-1-(Adamantane-1-carbonyl)-2-butyl-6,6-dimethyl-5,7-dioxaspiro[2.5]octane-4,8-dione (5c'x)**

The title compound was prepared from pentanal (0.3mmol), 2,2-dimethyl-1,3-dioxane-4,6-dione (0.4 mmol) and 1-adamantan-1-yl)-2-(dimethyl(oxo)- $\lambda^6$ -sulfaneylidene)ethan-1-one (0.2 mmol). The crude residue was purified by flash chromatography to give the product. (94%).

**$^1H$  NMR (500 MHz,  $CDCl_3$ )**  $\delta$  3.20 (d,  $J = 9.2$  Hz, 1H), 2.73 (td,  $J = 8.8, 6.0$  Hz, 1H), 1.98 (s, 3H), 1.86 – 1.54 (m, 20H), 1.43 – 1.25 (m, 4H), 0.84 (t,  $J = 7.2$  Hz, 3H).

**$^{13}C$  NMR (126 MHz,  $CDCl_3$ )**  $\delta$  205.6, 165.8, 164.9, 105.2, 46.9, 42.6, 40.8, 38.1, 36.5, 35.7, 30.6, 27.9, 27.6, 27.6, 25.9, 22.2, 13.9.

**HRMS** (ESI):  $m/z$  calcd for  $[C_{23}H_{32}O_5 + Na]^+$  411.2142; found: 411.2150

## 5. Structure Assignment of X-Ray Crystallographic Analysis

The single crystal of **4ab** and **5c'j** which were used for the determination of its relative configurations via X-ray crystallography (see below). The intensity data were collected using graphite- monochromated Mo  $K\alpha$  radiation.

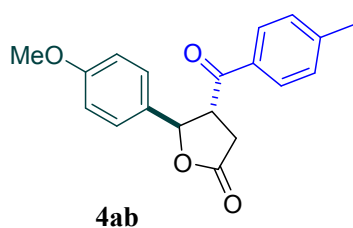

≡

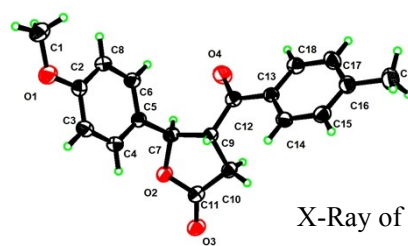

X-Ray of **4ab**  
CCDC: 2032797

|                                             |                                                               |
|---------------------------------------------|---------------------------------------------------------------|
| Identification code                         | <b>4ab</b>                                                    |
| Empirical formula                           | C <sub>19</sub> H <sub>18</sub> O <sub>4</sub>                |
| Formula weight                              | 310.33                                                        |
| Temperature/K                               | 298                                                           |
| Crystal system                              | monoclinic                                                    |
| Space group                                 | P2 <sub>1</sub> /c                                            |
| a/Å                                         | 6.1019(5)                                                     |
| b/Å                                         | 24.438(2)                                                     |
| c/Å                                         | 10.8818(10)                                                   |
| α/°                                         | 90                                                            |
| β/°                                         | 103.537(3)                                                    |
| γ/°                                         | 90                                                            |
| Volume/Å <sup>3</sup>                       | 1577.6(2)                                                     |
| Z                                           | 4                                                             |
| ρ <sub>calc</sub> /cm <sup>3</sup>          | 1.307                                                         |
| μ/mm <sup>-1</sup>                          | 0.091                                                         |
| F(000)                                      | 656.0                                                         |
| Crystal size/mm <sup>3</sup>                | 0.15 × 0.08 × 0.05                                            |
| Radiation                                   | MoKα (λ = 0.71073)                                            |
| 2θ range for data collection/°              | 4.196 to 52.802                                               |
| Index ranges                                | -7 ≤ h ≤ 7, -30 ≤ k ≤ 30, -13 ≤ l ≤ 13                        |
| Reflections collected                       | 18064                                                         |
| Independent reflections                     | 3236 [R <sub>int</sub> = 0.0829, R <sub>sigma</sub> = 0.0610] |
| Data/restraints/parameters                  | 3236/0/210                                                    |
| Goodness-of-fit on F <sup>2</sup>           | 1.042                                                         |
| Final R indexes [I ≥ 2σ (I)]                | R1 = 0.0566, wR2 = 0.1175                                     |
| Final R indexes [all data]                  | R1 = 0.1101, wR2 = 0.1514                                     |
| Largest diff. peak/hole / e Å <sup>-3</sup> | 0.17/-0.19                                                    |

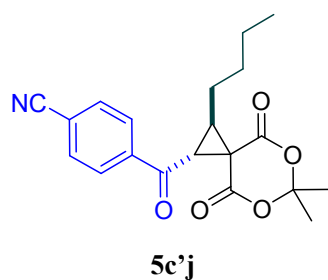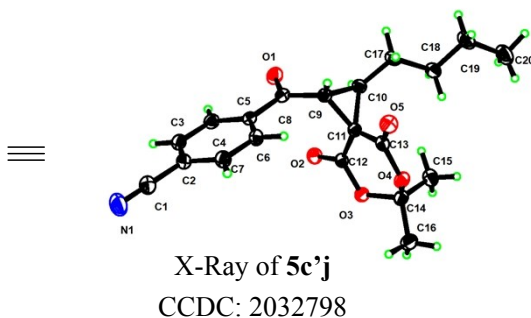

|                                             |                                                               |
|---------------------------------------------|---------------------------------------------------------------|
| Identification code                         | <b>5c'j</b>                                                   |
| Empirical formula                           | C <sub>20</sub> H <sub>21</sub> NO <sub>5</sub>               |
| Formula weight                              | 355.38                                                        |
| Temperature/K                               | 170                                                           |
| Crystal system                              | triclinic                                                     |
| Space group                                 | P-1                                                           |
| a/Å                                         | 10.4985(4)                                                    |
| b/Å                                         | 12.0839(5)                                                    |
| c/Å                                         | 15.4535(7)                                                    |
| α/°                                         | 74.6320(10)                                                   |
| β/°                                         | 74.3520(10)                                                   |
| γ/°                                         | 84.0530(10)                                                   |
| Volume/Å <sup>3</sup>                       | 1819.22(13)                                                   |
| Z                                           | 4                                                             |
| ρ <sub>calc</sub> /cm <sup>3</sup>          | 1.298                                                         |
| μ/mm <sup>-1</sup>                          | 0.093                                                         |
| F(000)                                      | 752.0                                                         |
| Crystal size/mm <sup>3</sup>                | 0.19 × 0.12 × 0.08                                            |
| Radiation                                   | MoKα (λ = 0.71073)                                            |
| 2θ range for data collection/°              | 3.914 to 52.994                                               |
| Index ranges                                | -13 ≤ h ≤ 13, -15 ≤ k ≤ 15, -19 ≤ l ≤ 19                      |
| Reflections collected                       | 21041                                                         |
| Independent reflections                     | 7441 [R <sub>int</sub> = 0.0618, R <sub>sigma</sub> = 0.0740] |
| Data/restraints/parameters                  | 7441/0/475                                                    |
| Goodness-of-fit on F <sup>2</sup>           | 1.007                                                         |
| Final R indexes [I ≥ 2σ (I)]                | R <sub>1</sub> = 0.0500, wR <sub>2</sub> = 0.1103             |
| Final R indexes [all data]                  | R <sub>1</sub> = 0.0991, wR <sub>2</sub> = 0.1433             |
| Largest diff. peak/hole / e Å <sup>-3</sup> | 0.21/-0.21                                                    |

## 6. References

- [1] D. C. G. Rafael, A. Anees, M. Gustavo, C. B. B. Antonio,  $\alpha,\alpha$ -Alkylation-Halogenation and Dihalogenation of Sulfoxonium Ylides. A Direct Preparation of Geminal Difunctionalized Ketones. *Chem. Eur. J.*, 2017, **23**, 16980-16984.

## 7. Copies of NMR Spectra for Compounds

### 7.1. Copies of NMR Spectra for Compounds of 4aa-4au

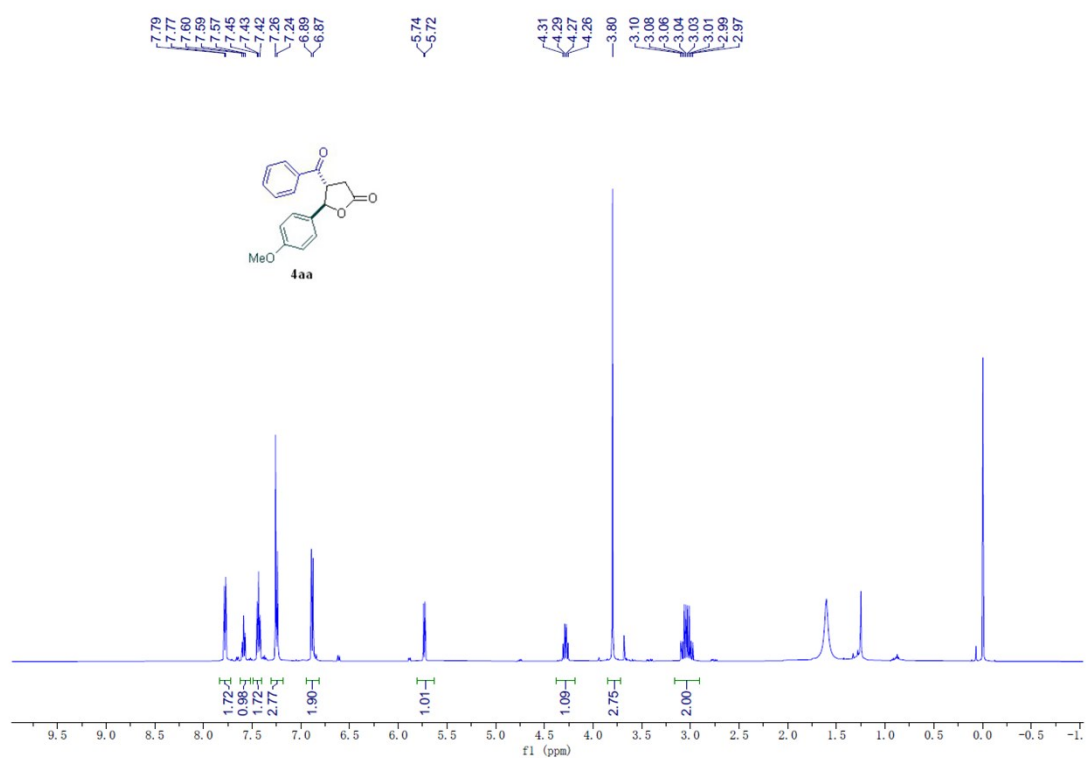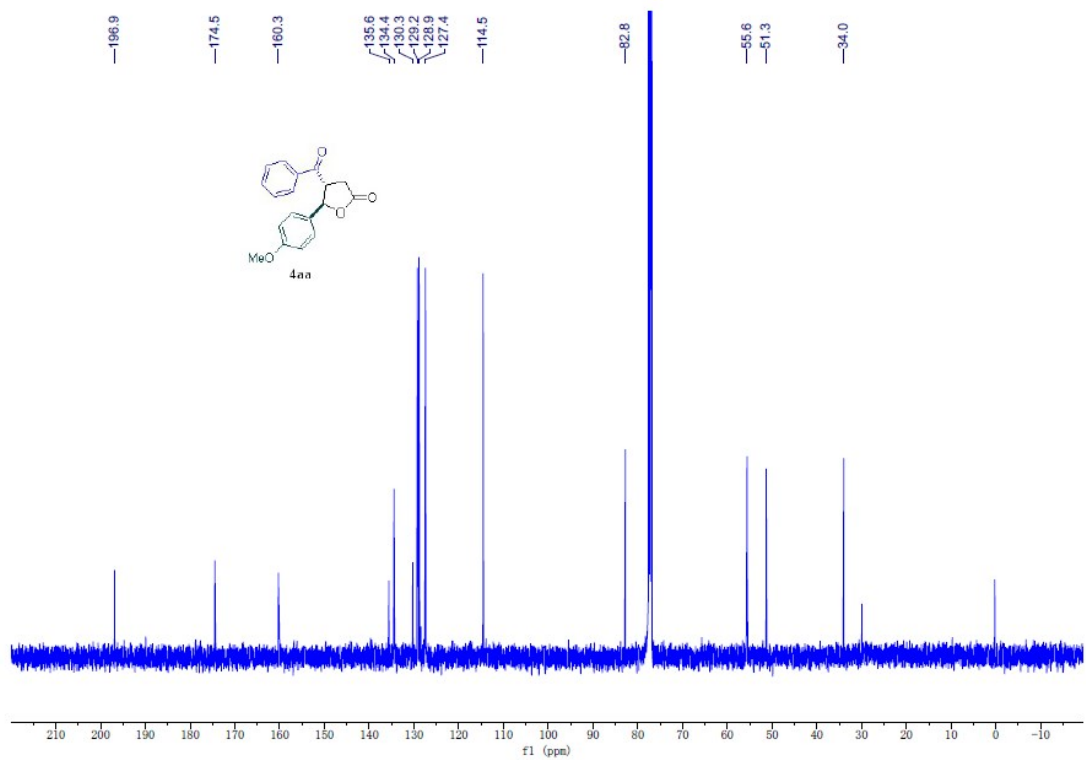

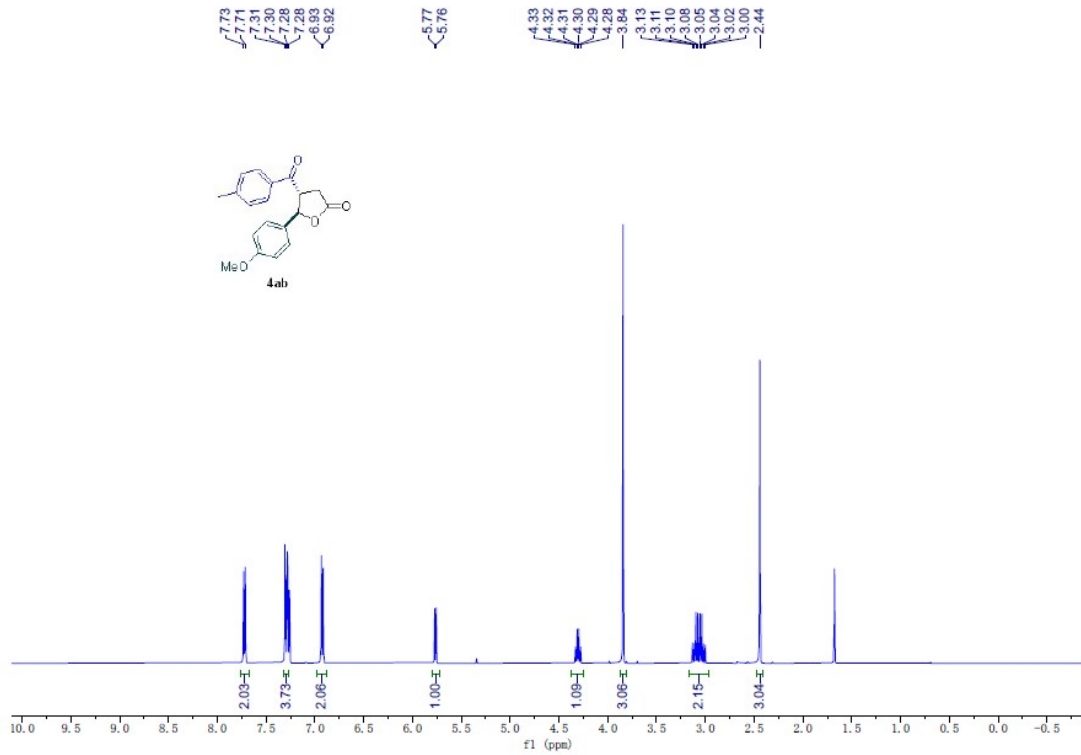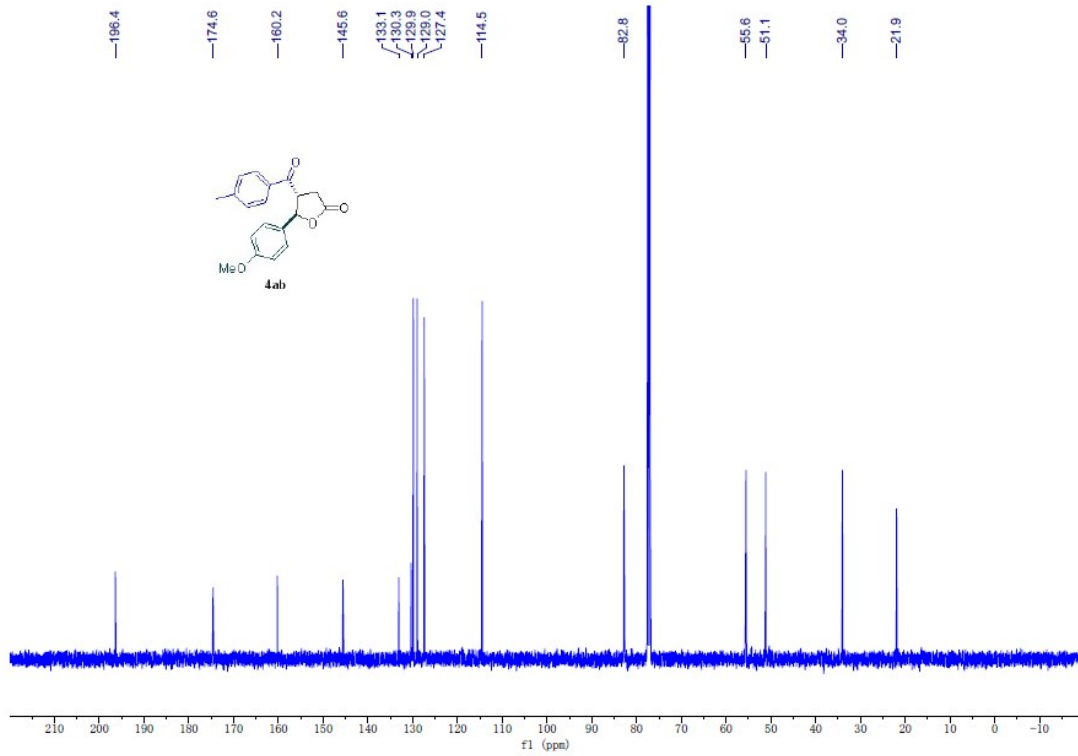



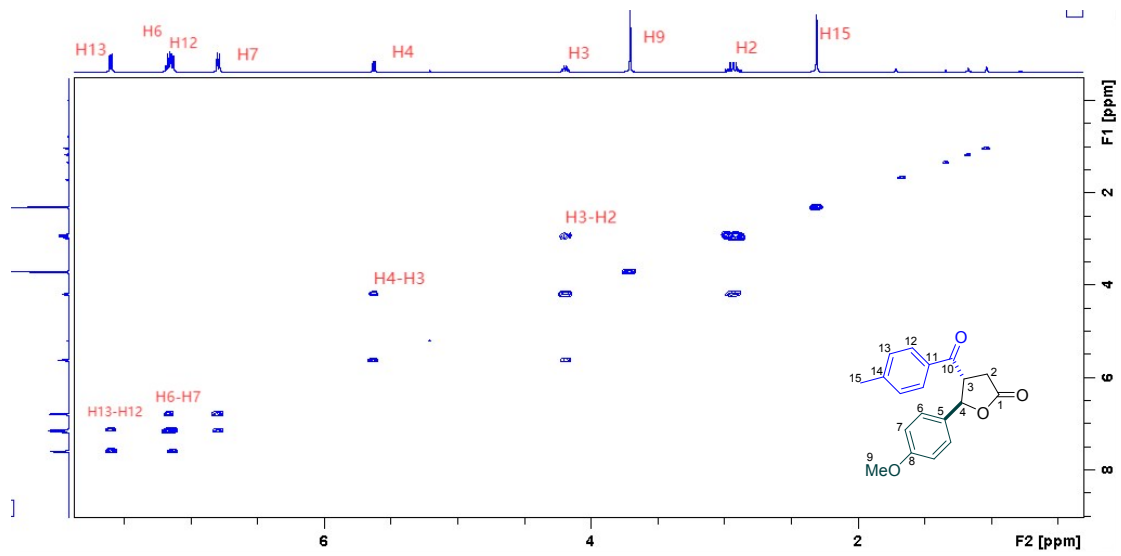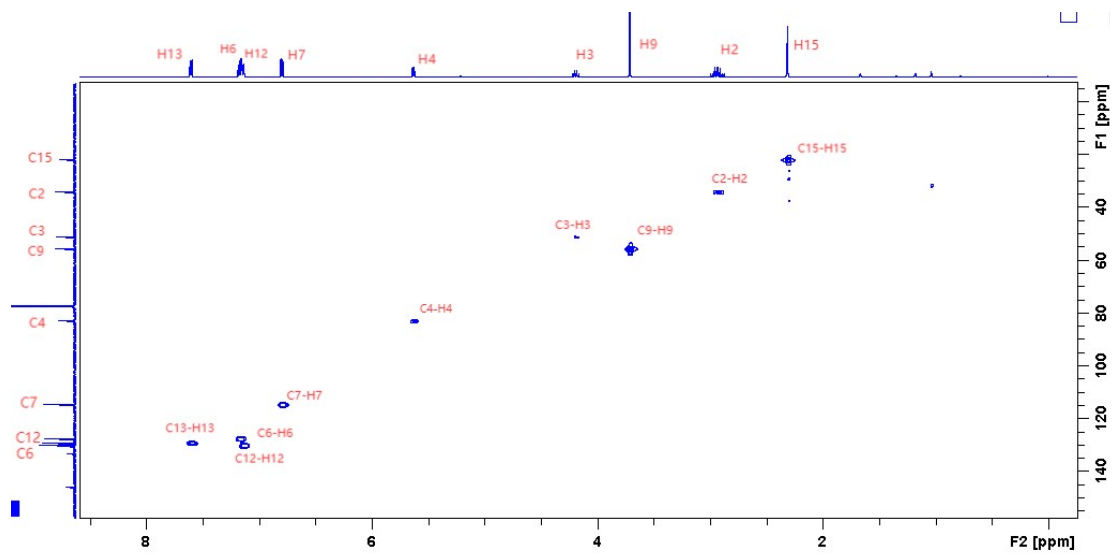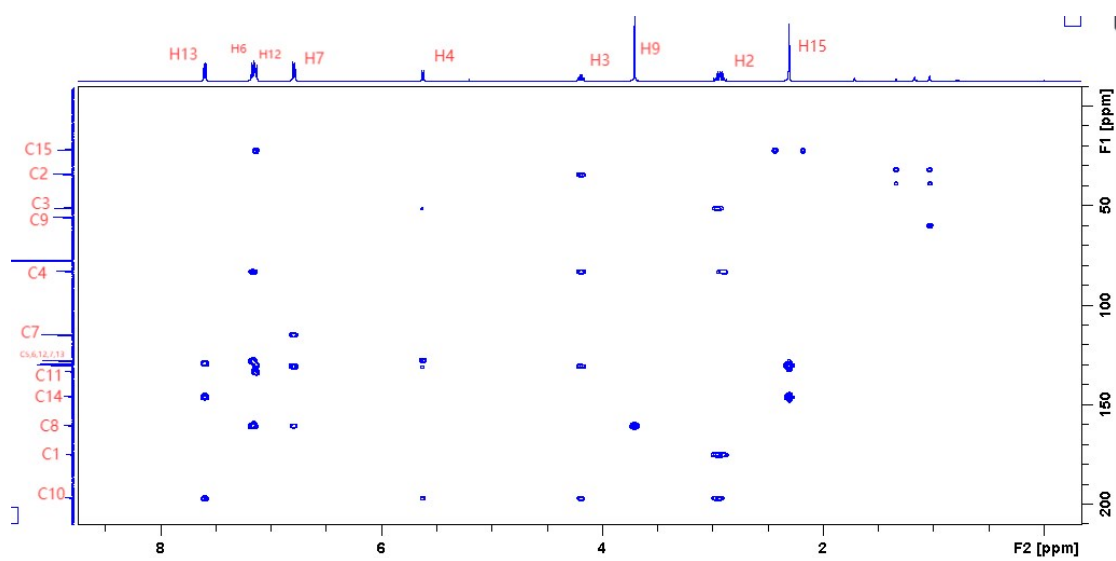

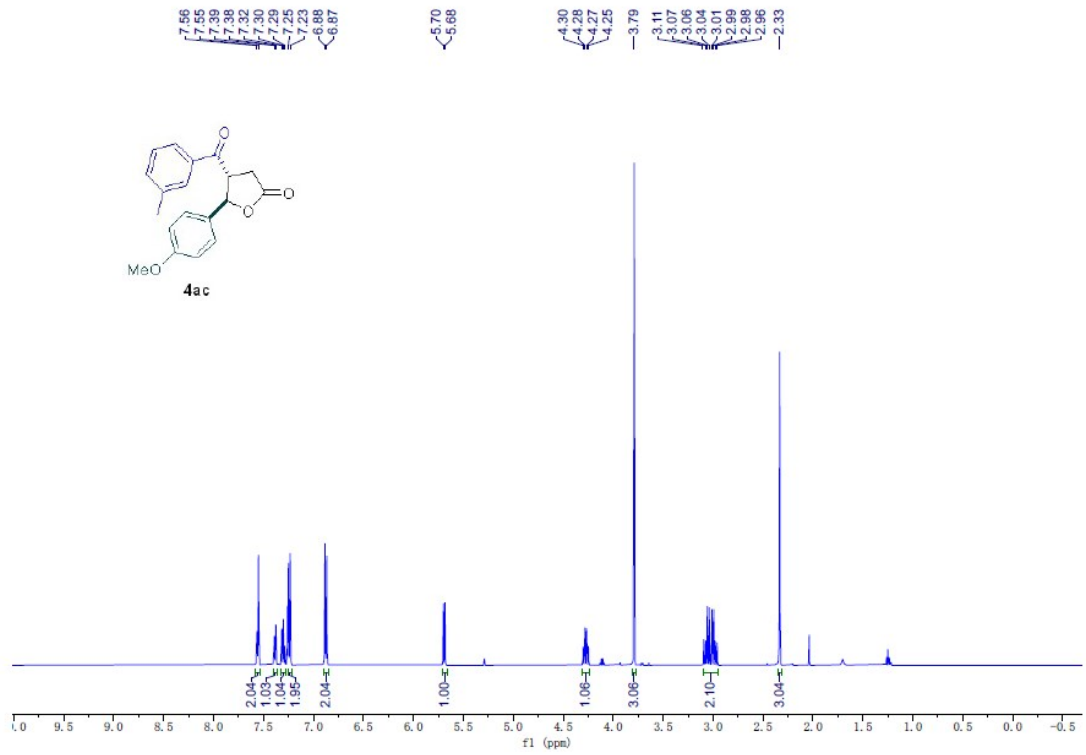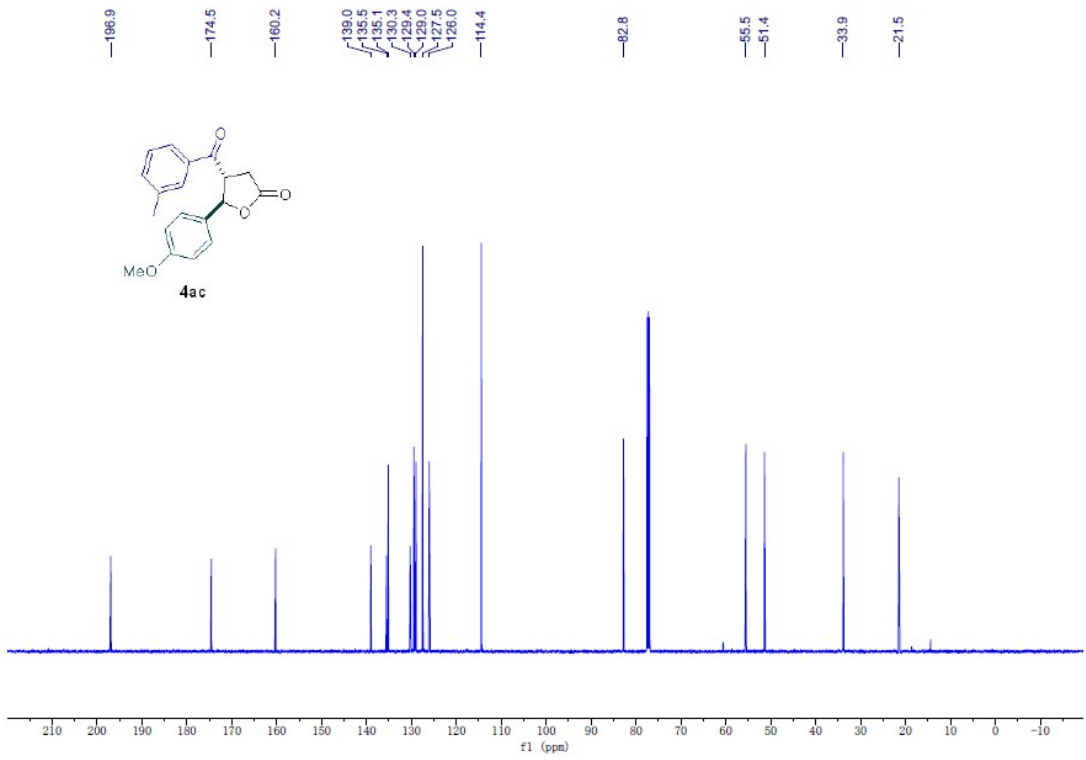

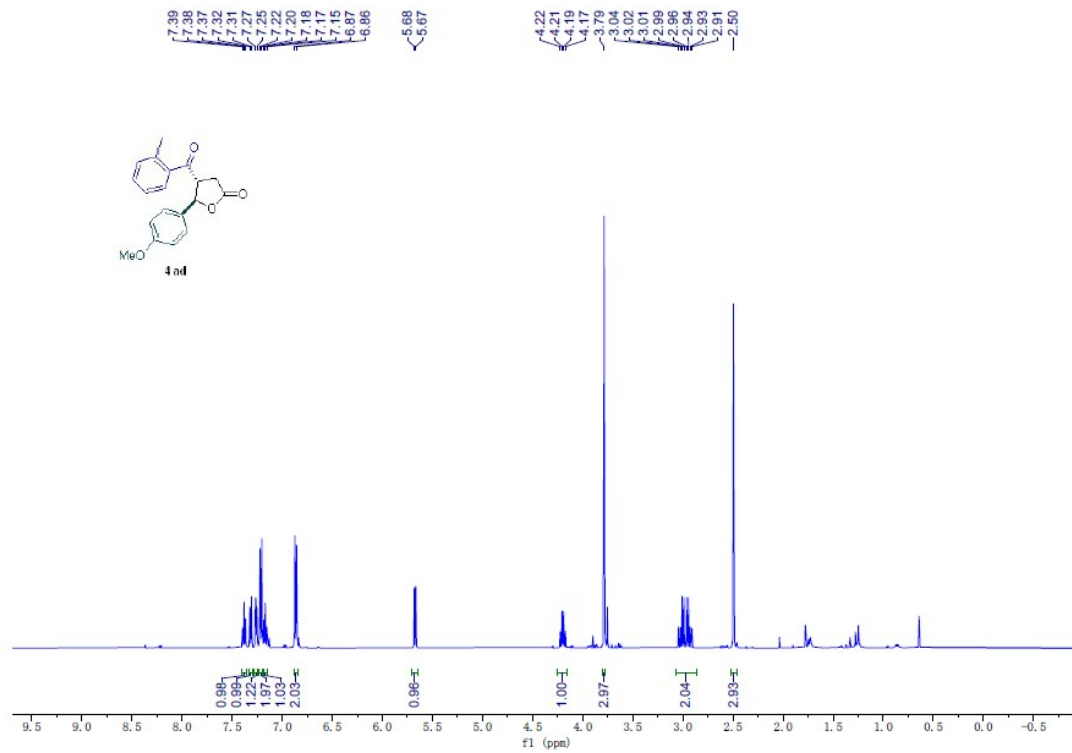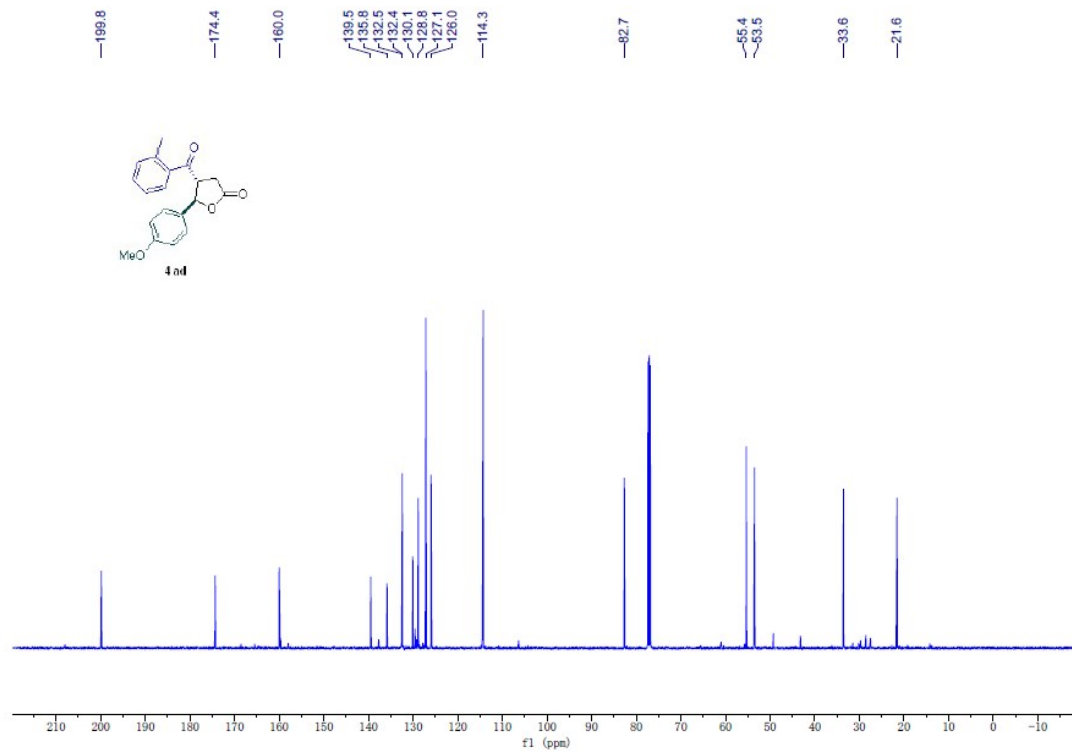

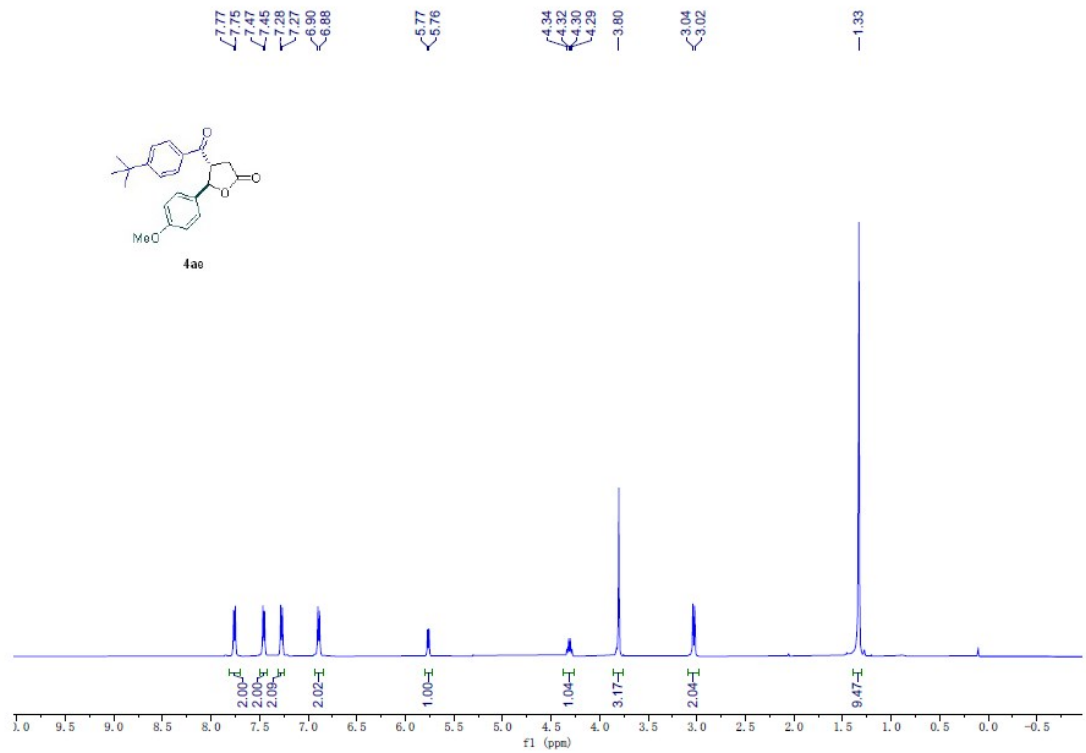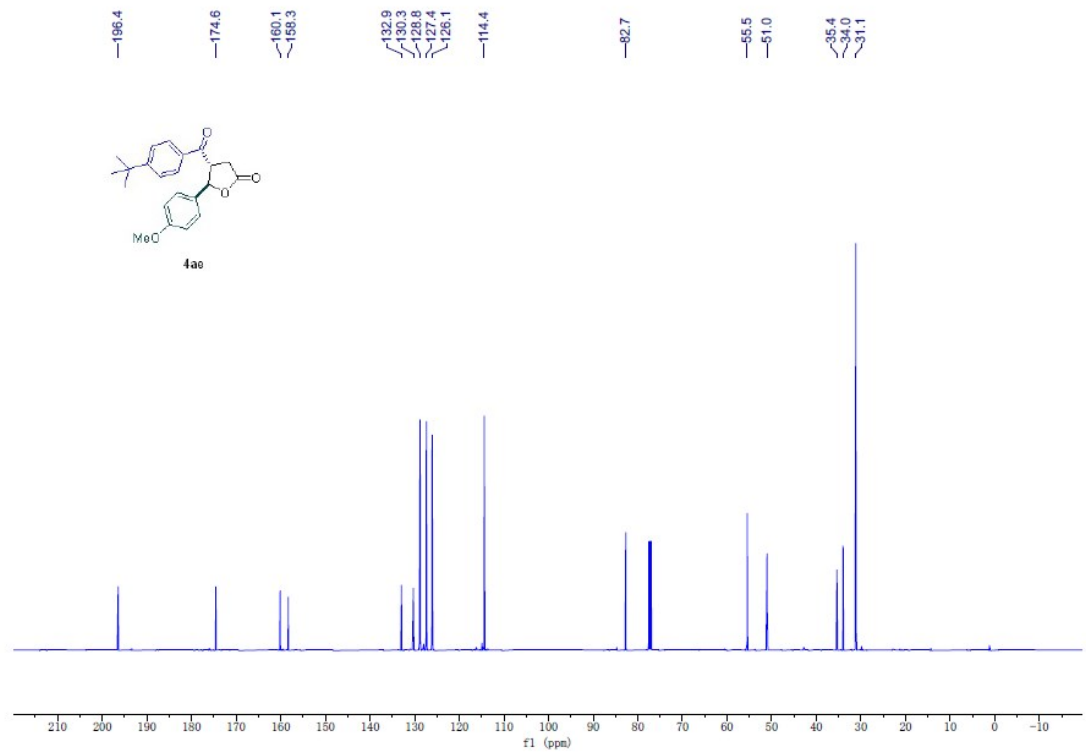

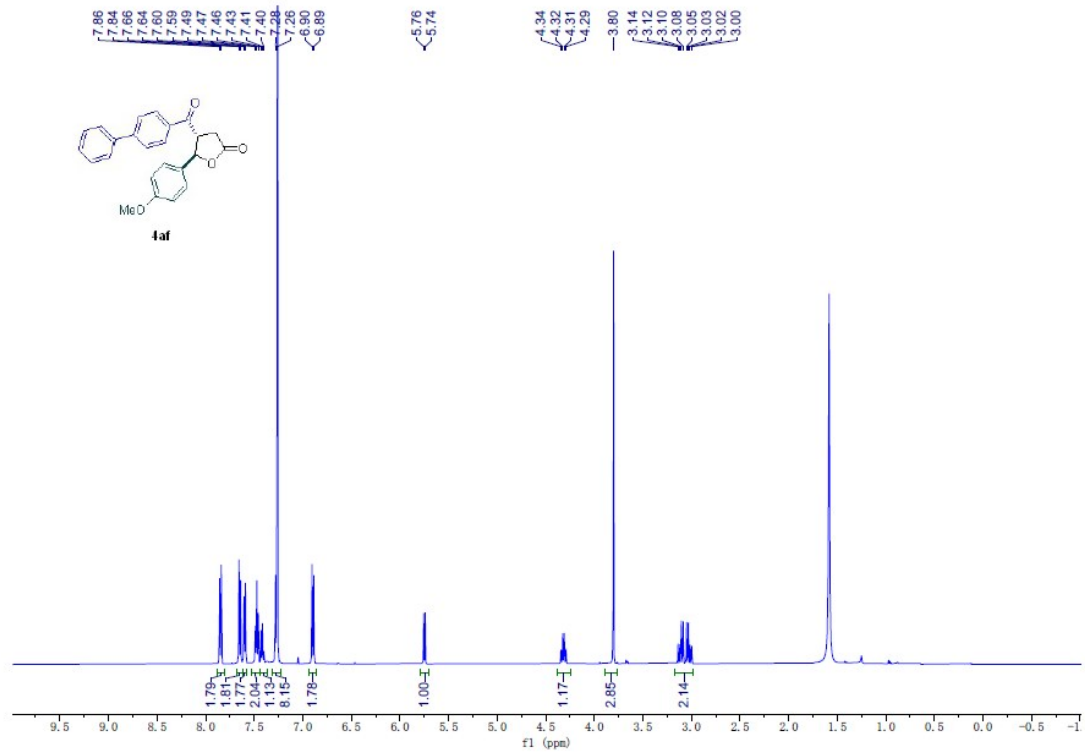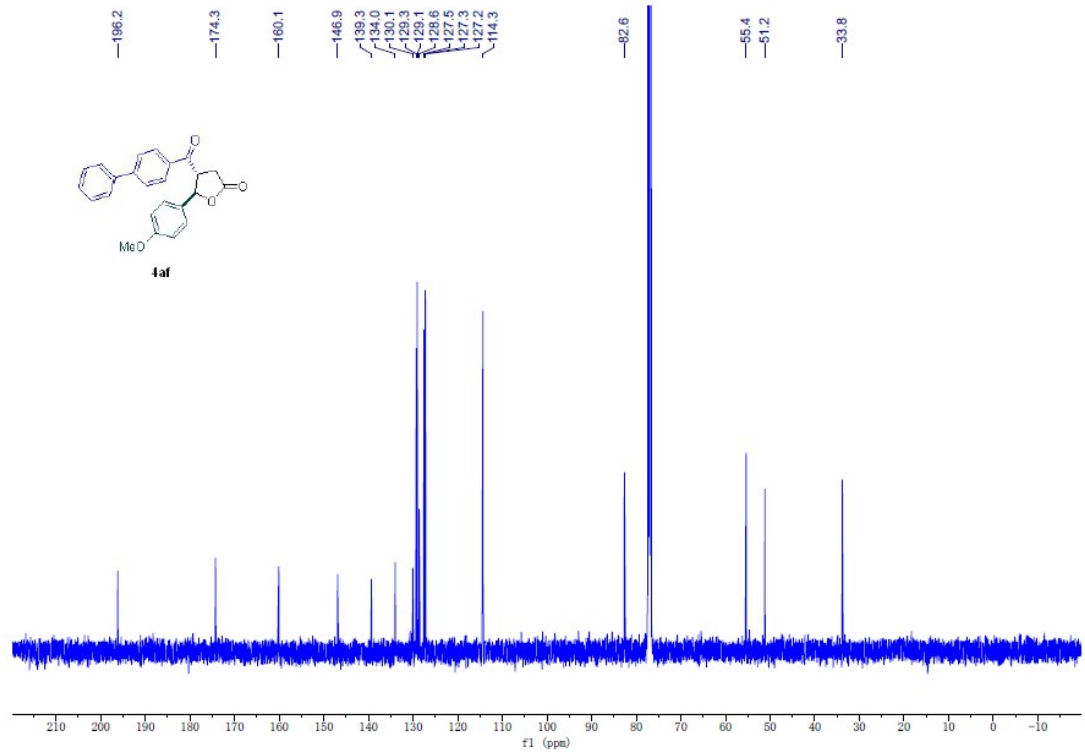

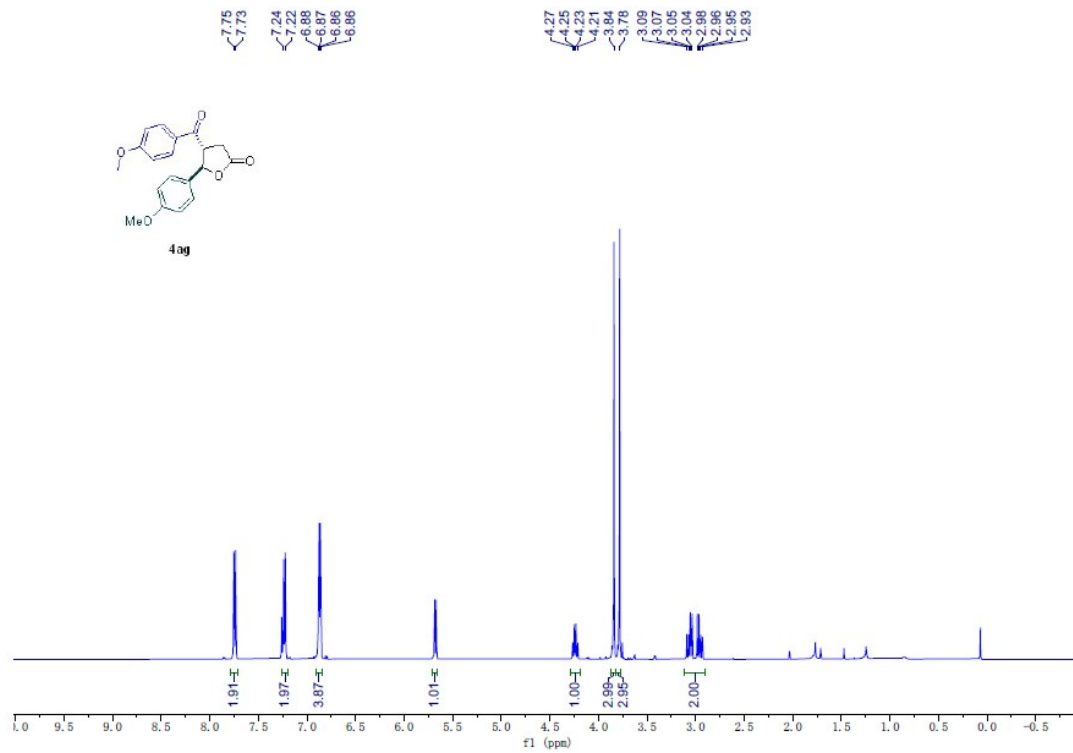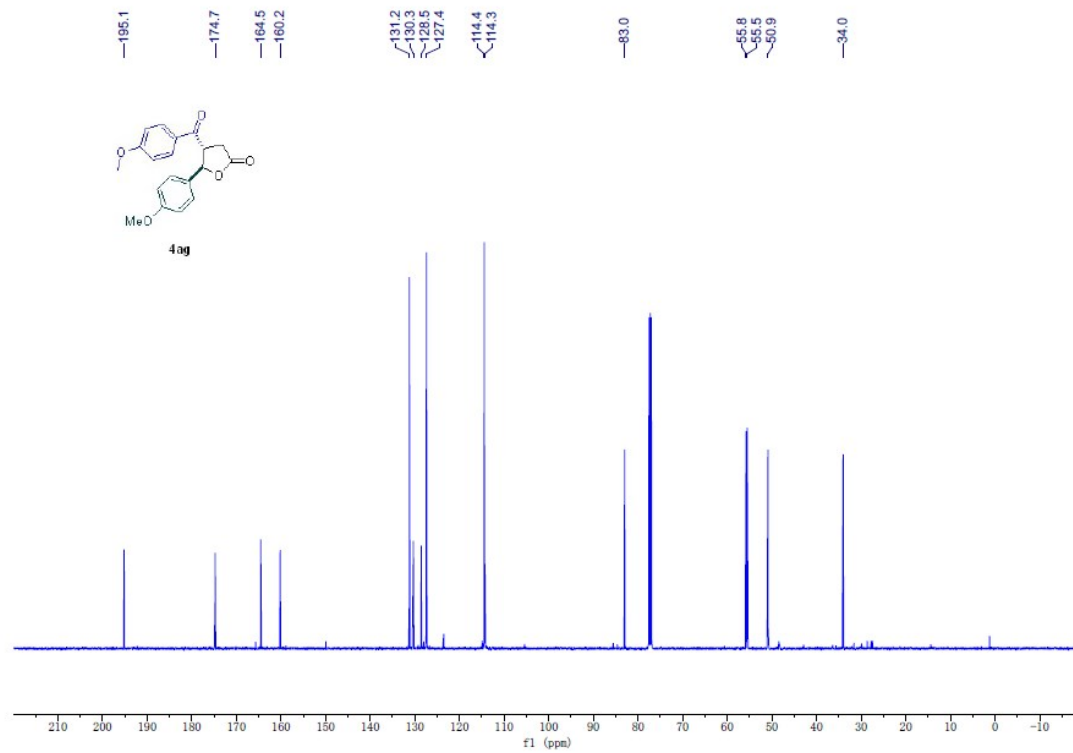

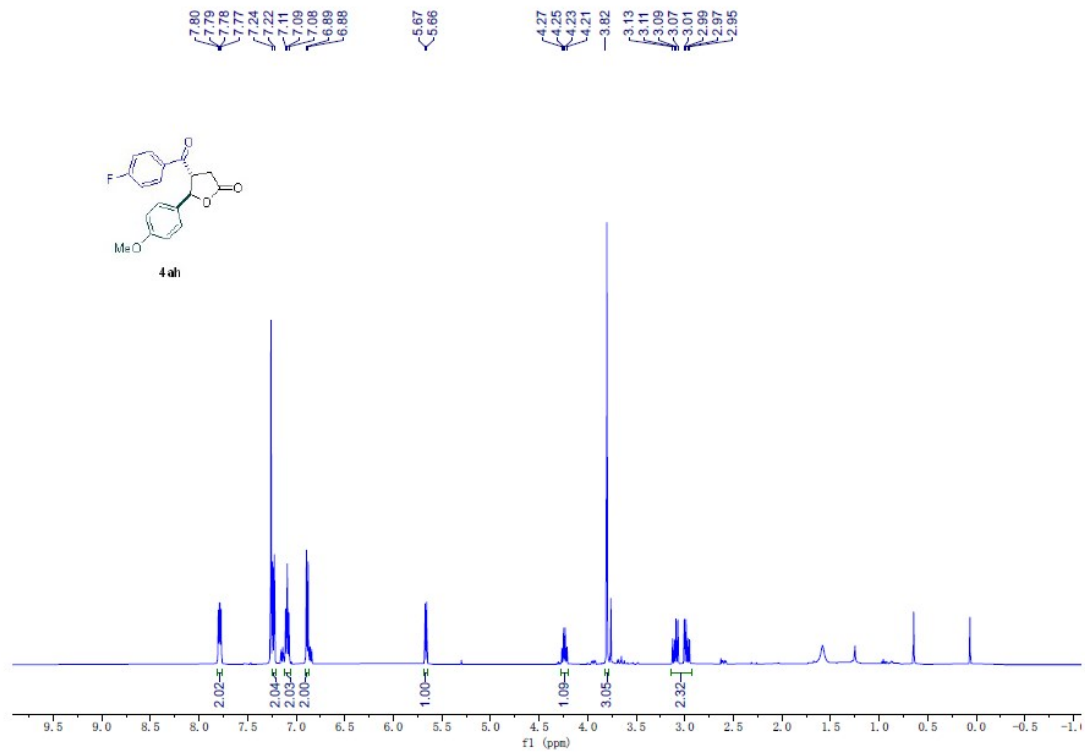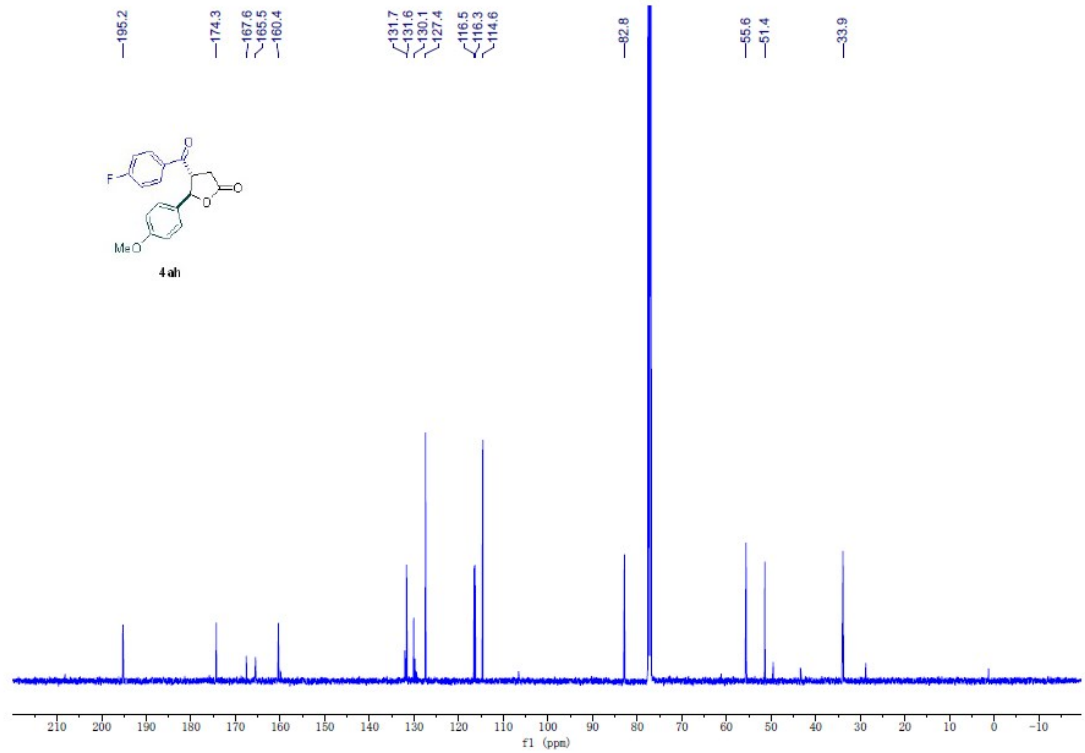

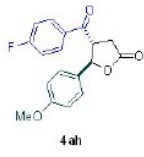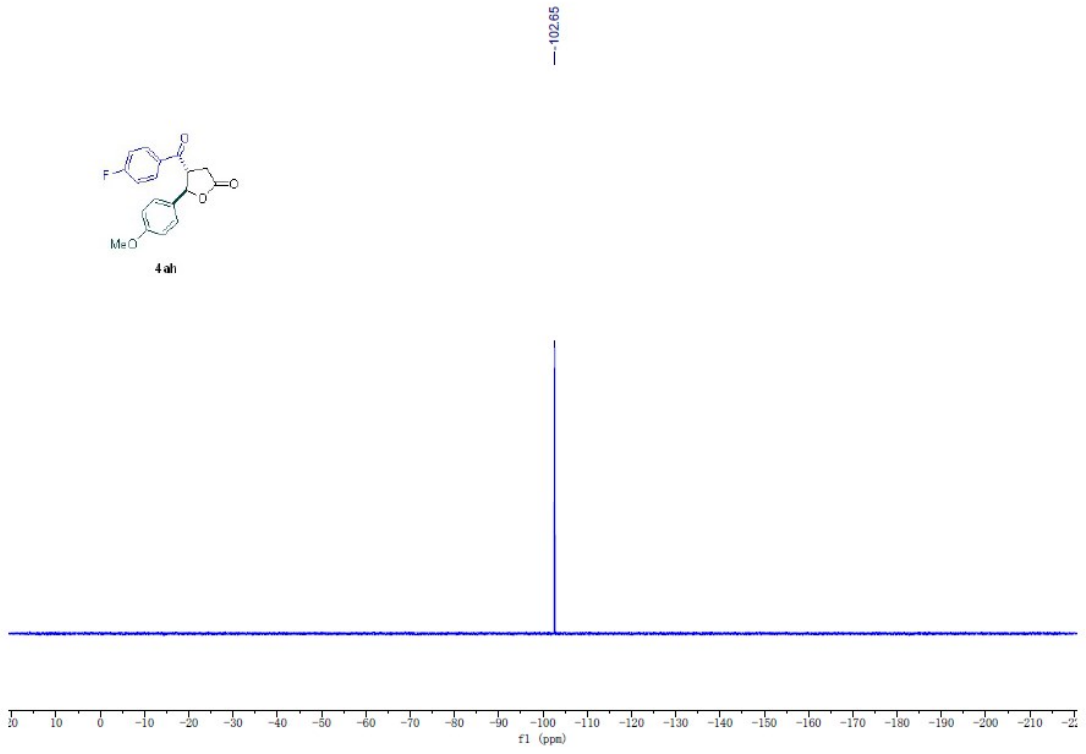



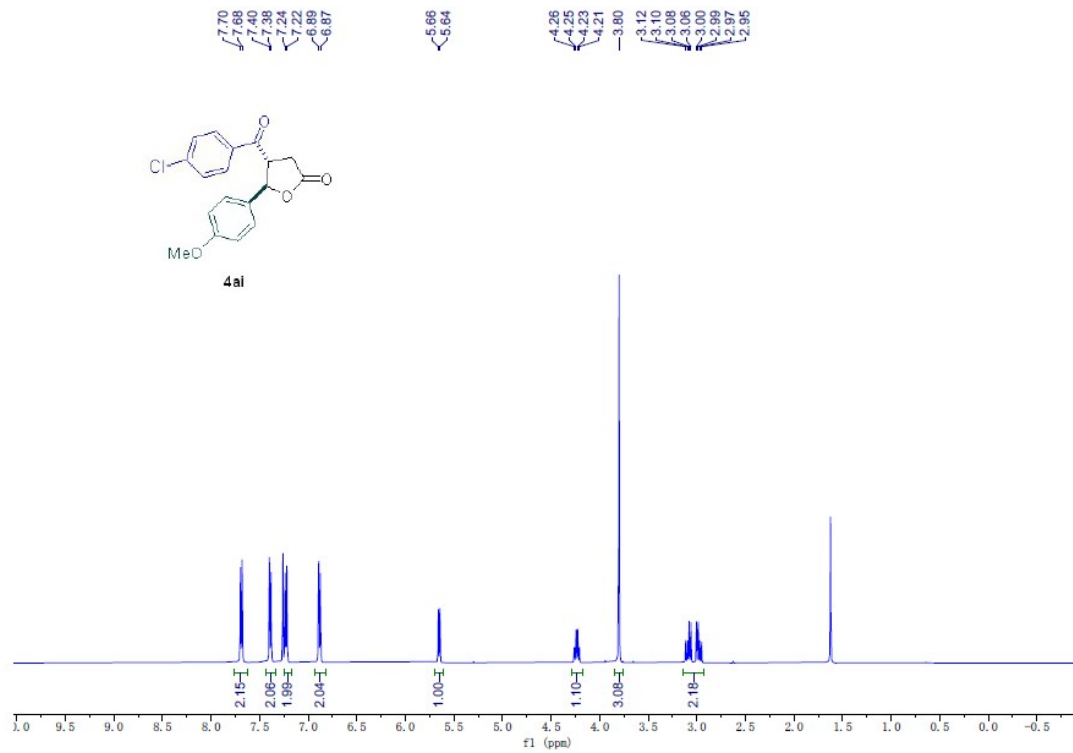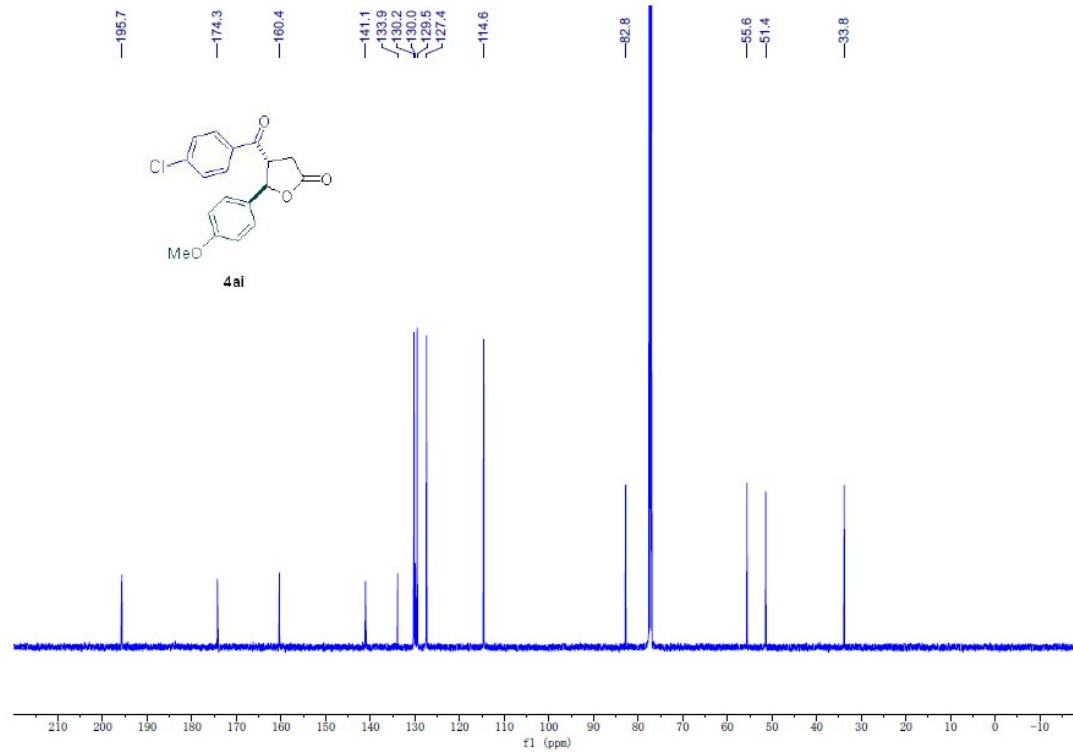

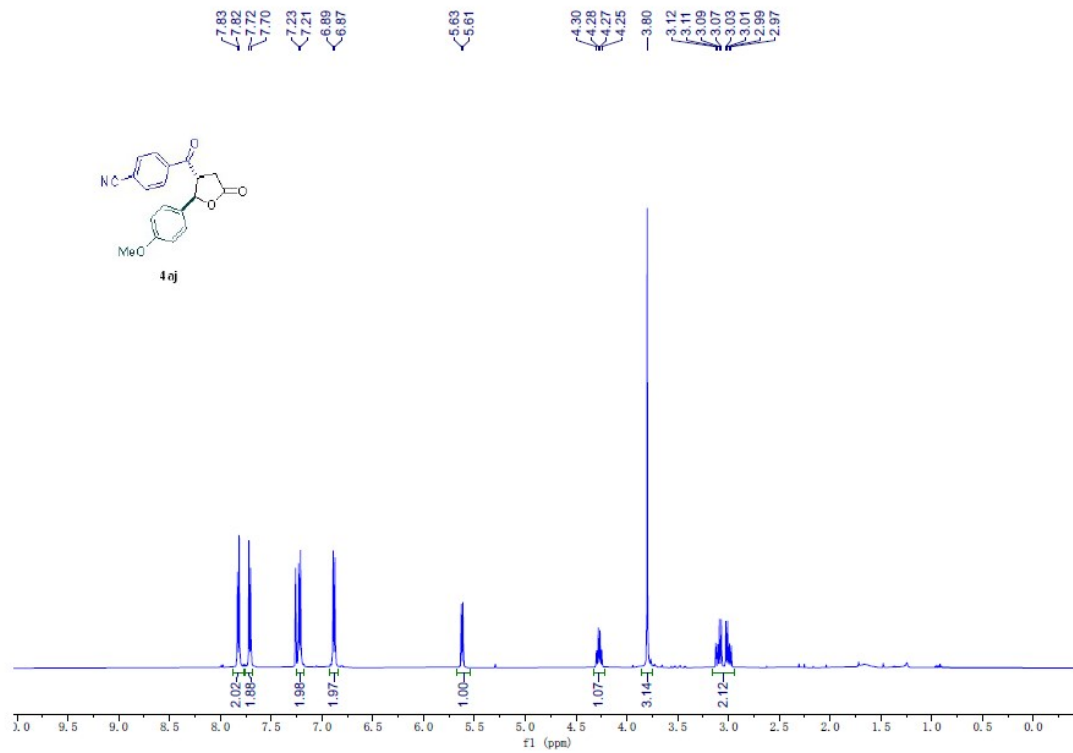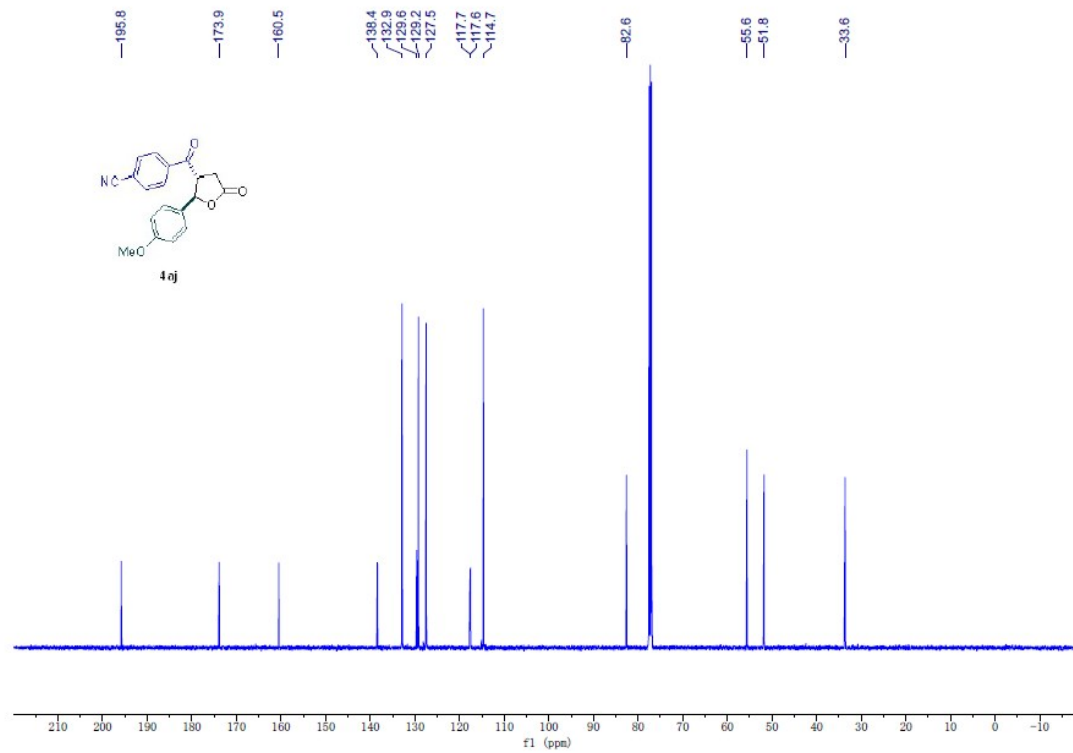

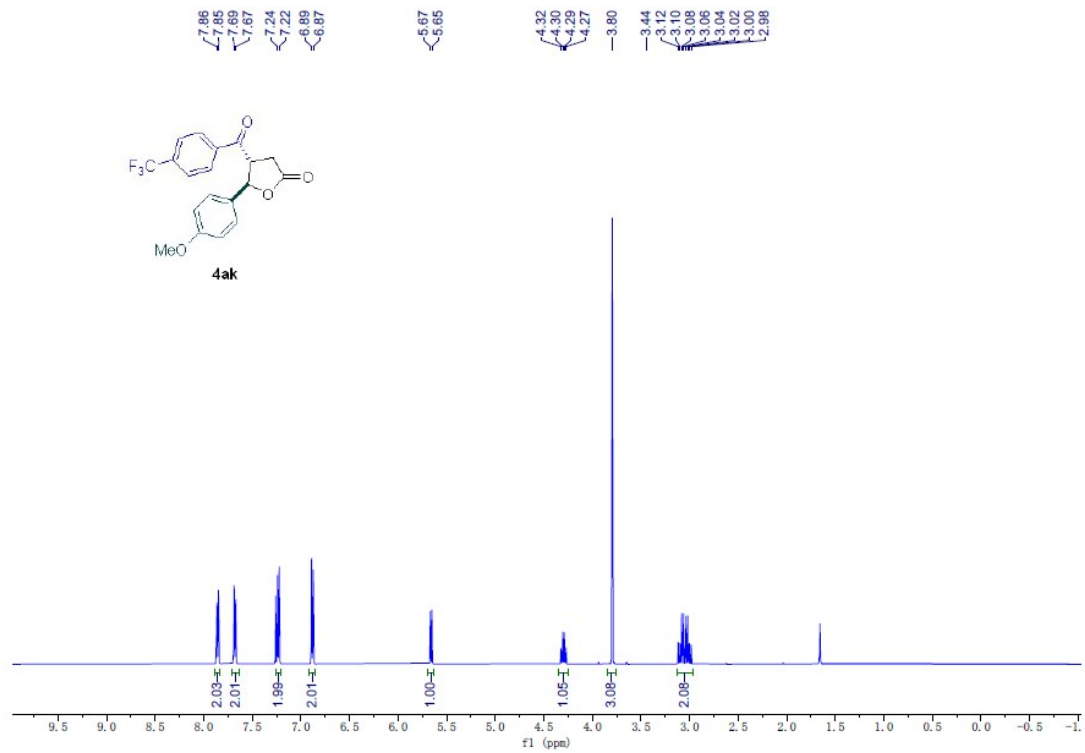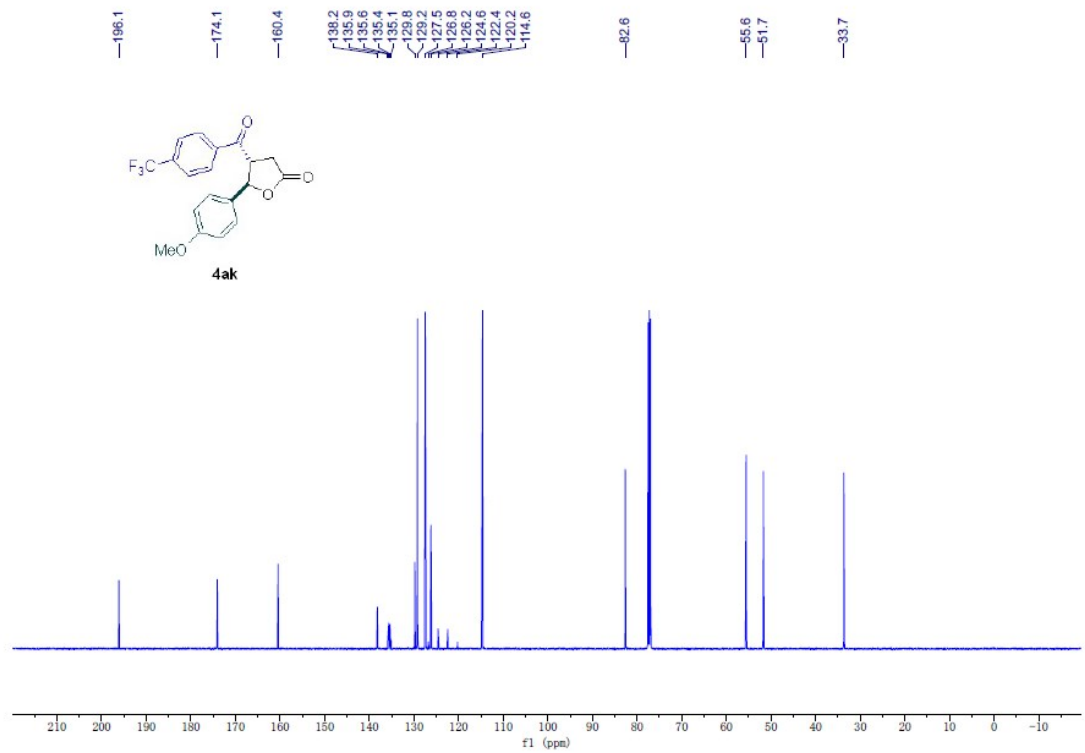

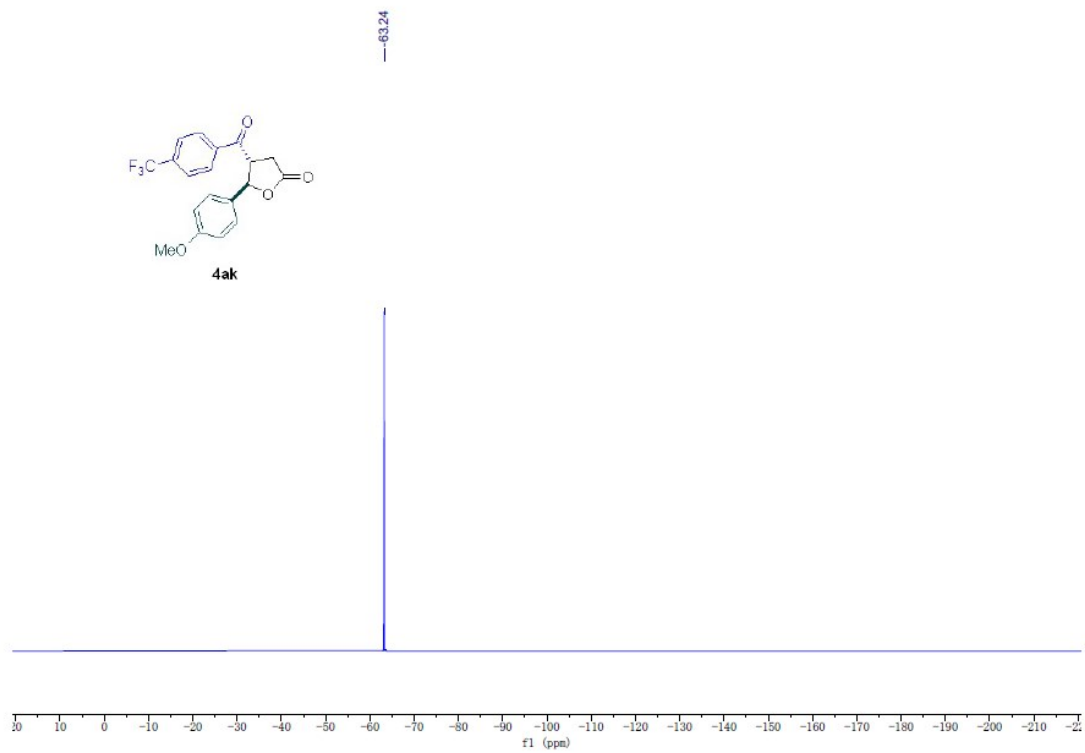

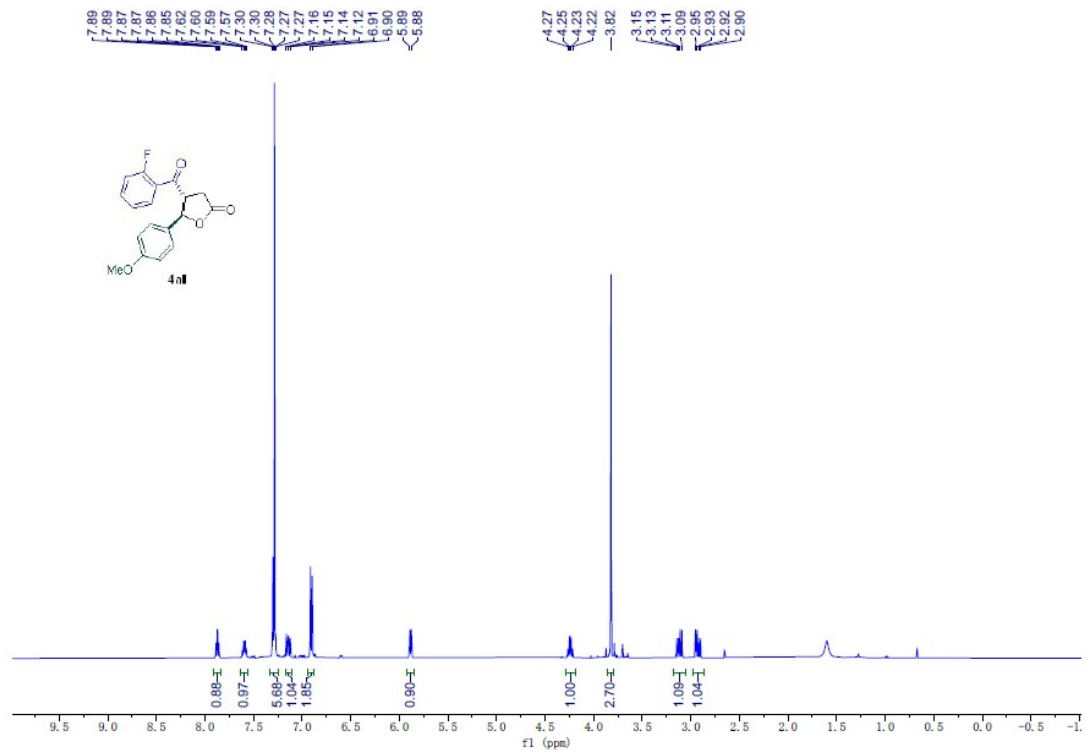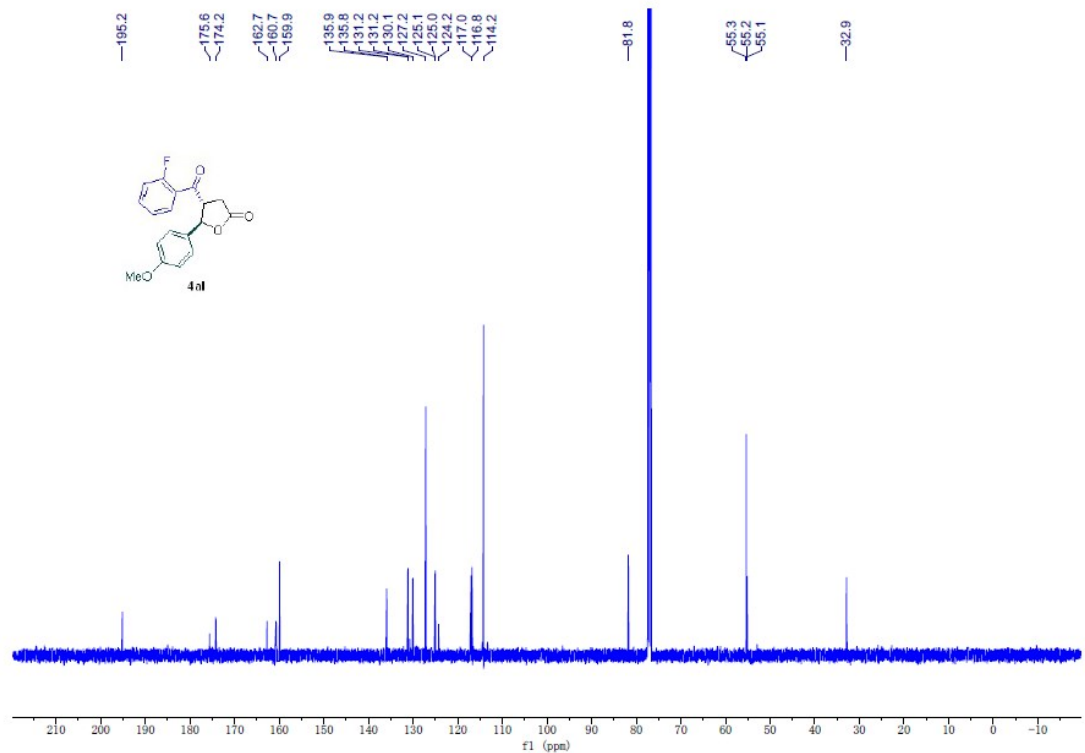

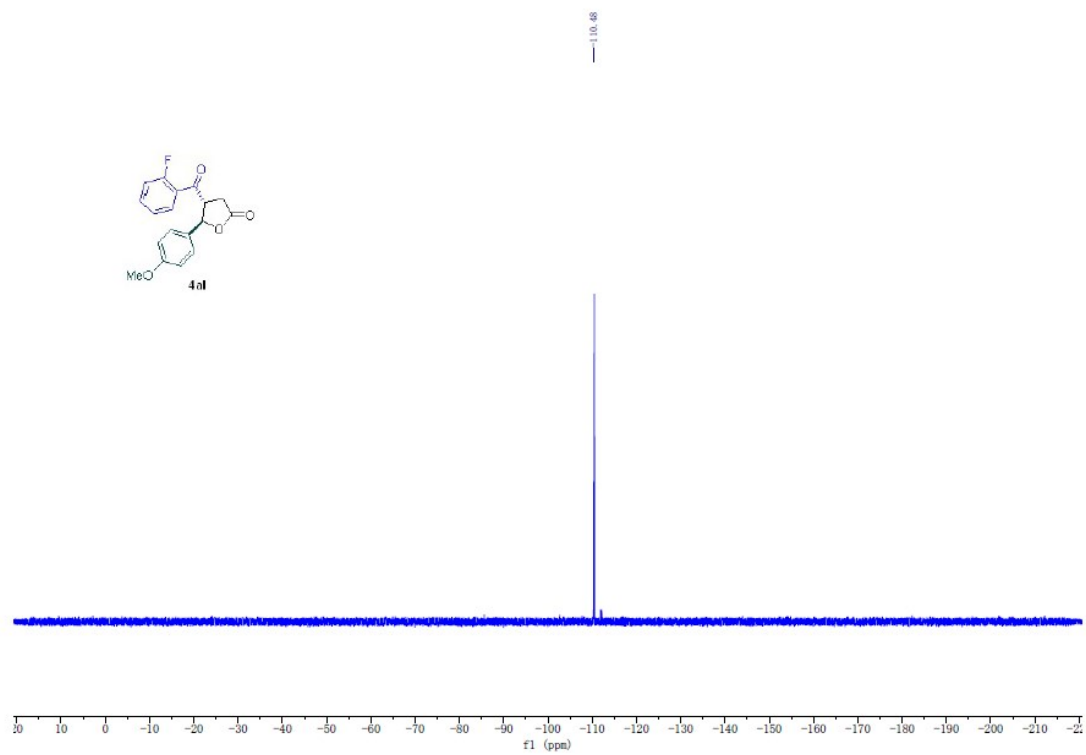

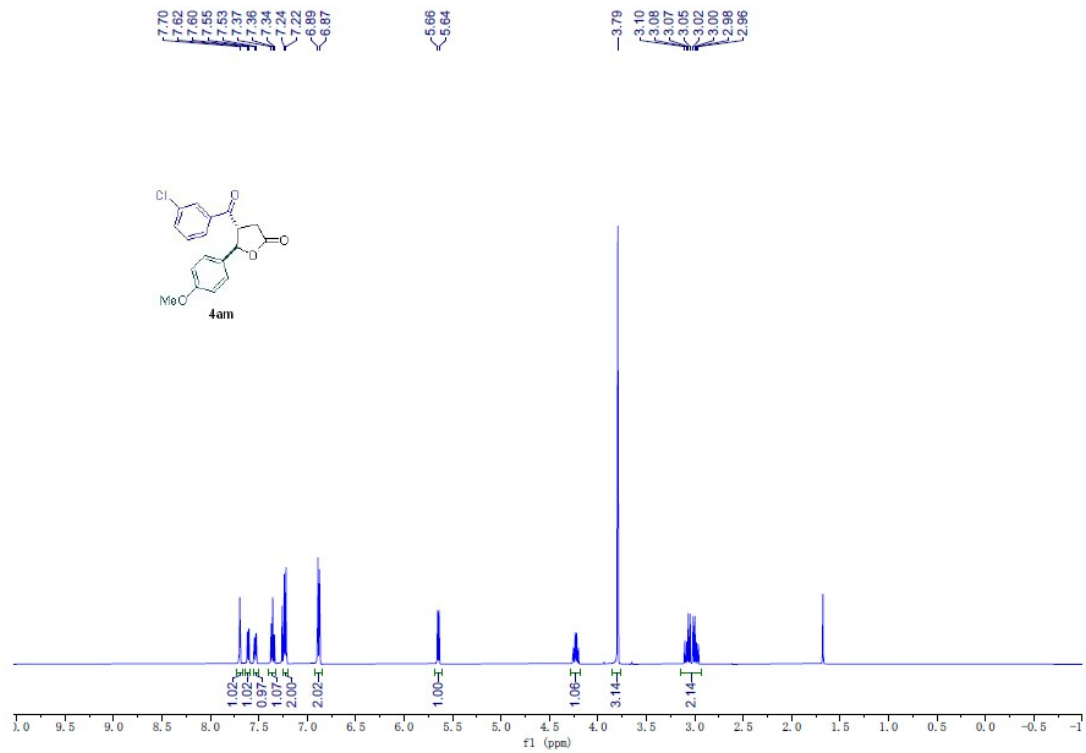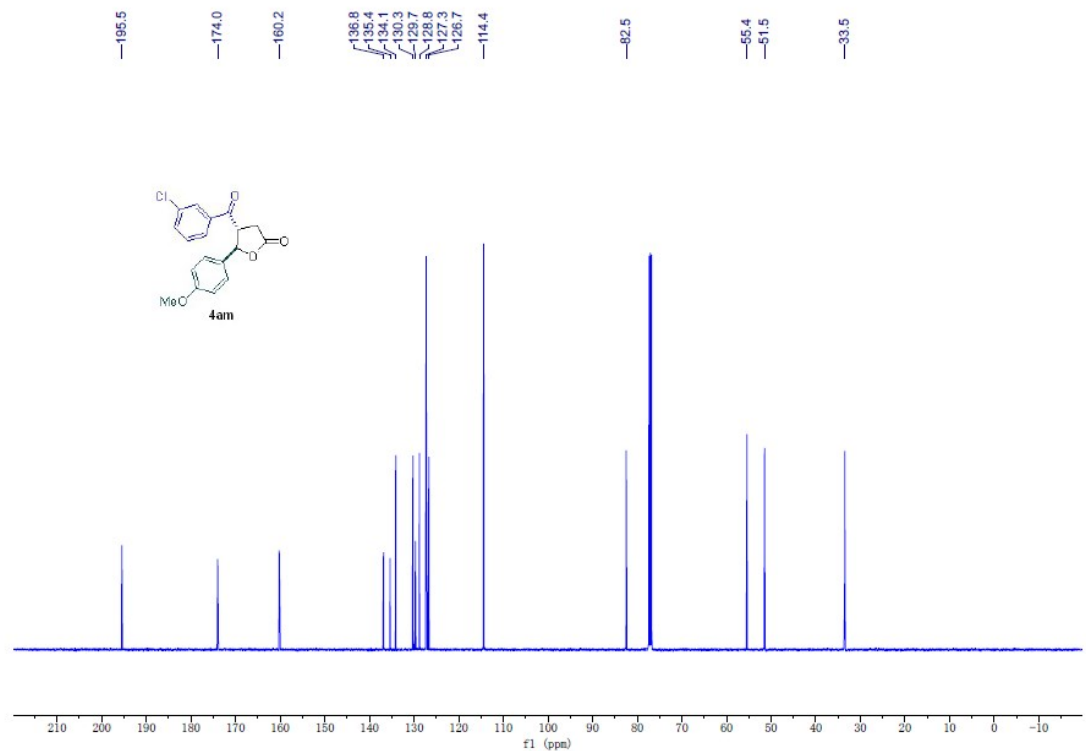

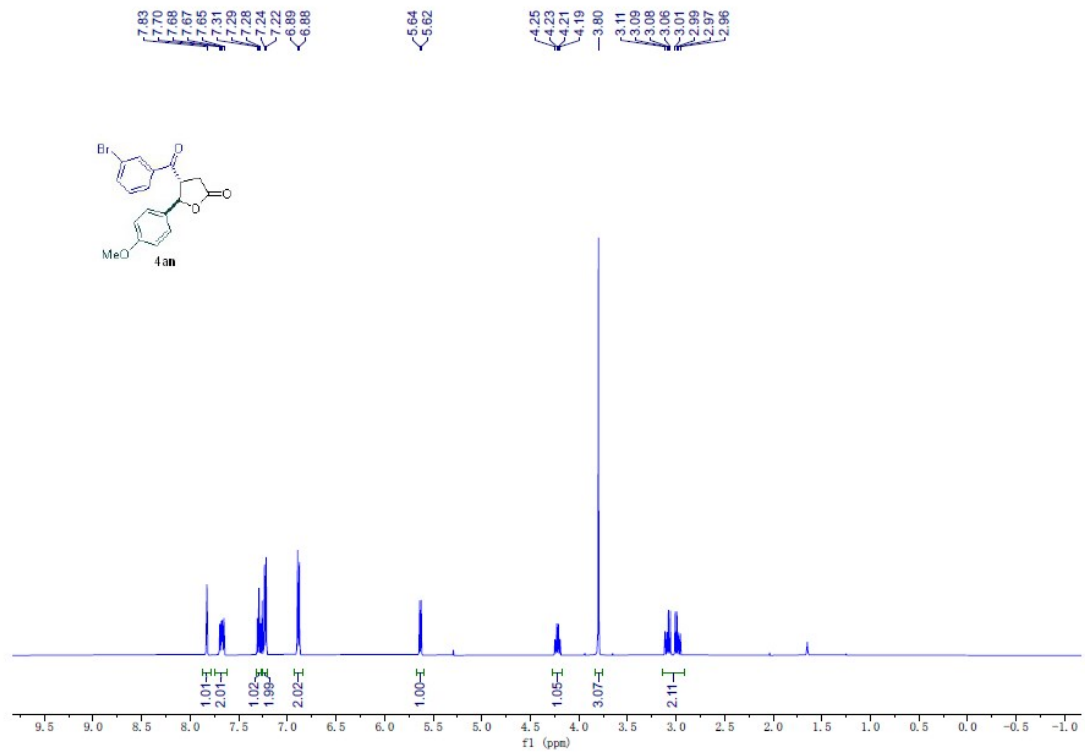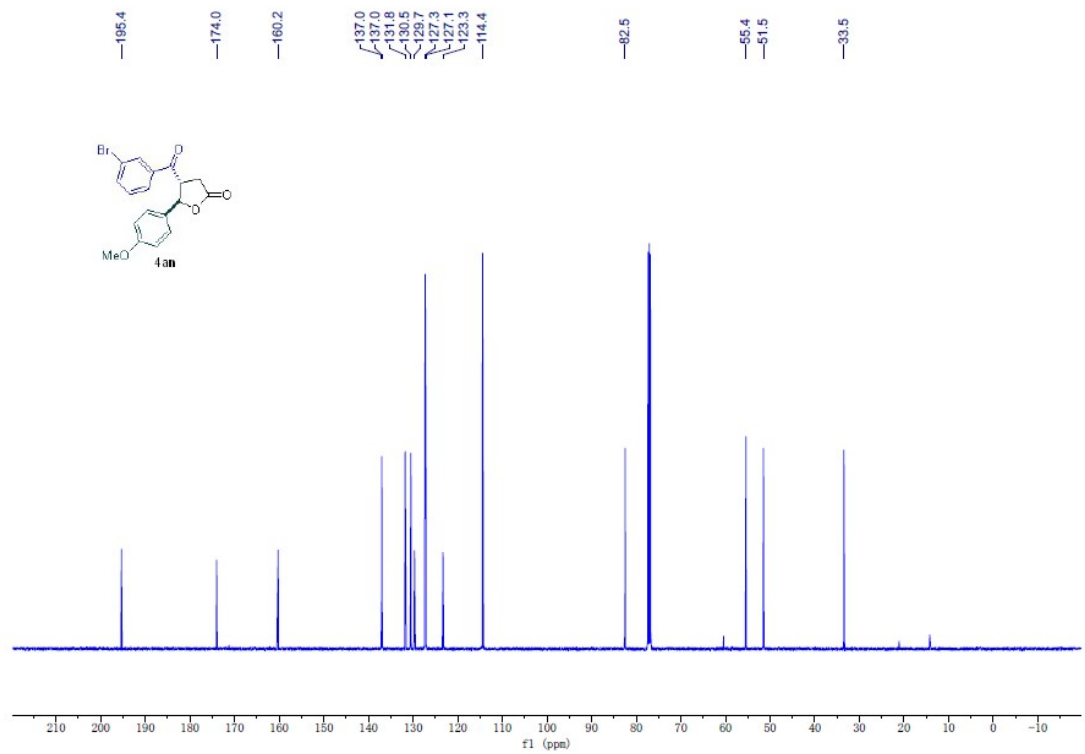



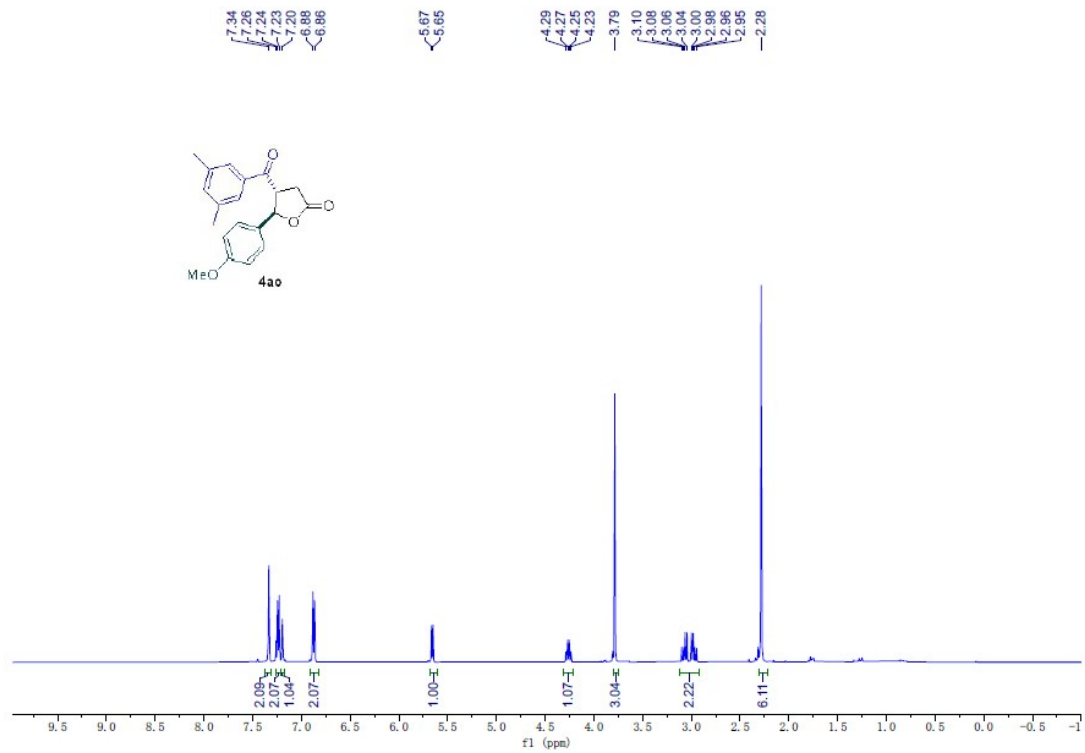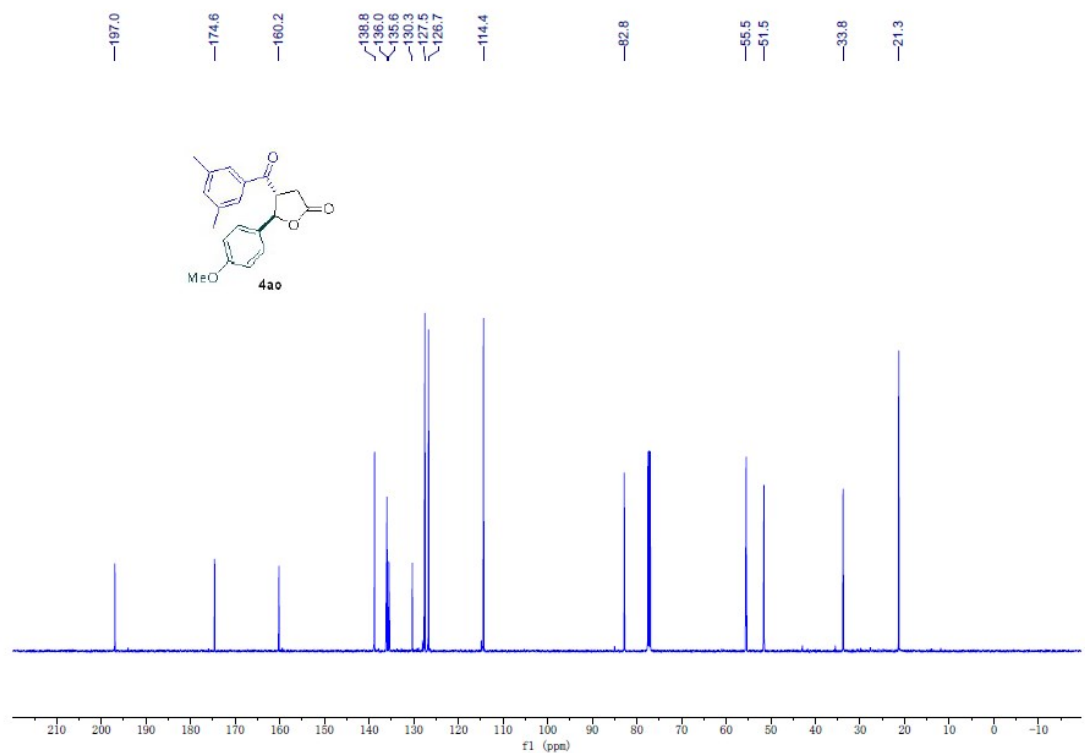

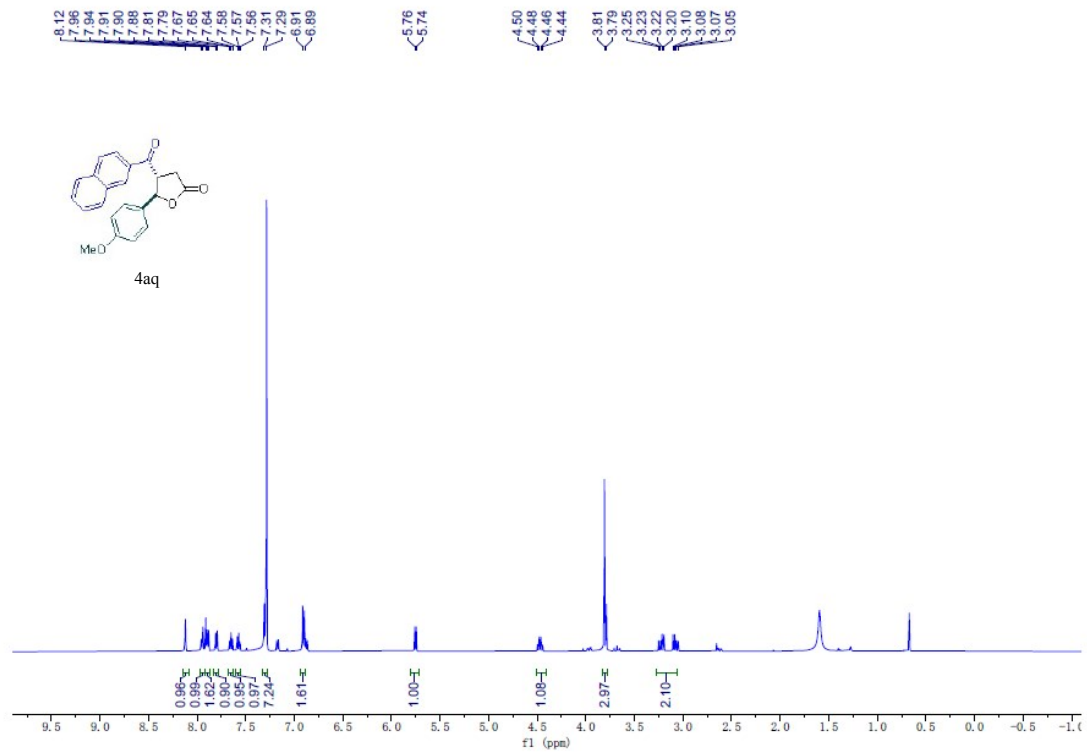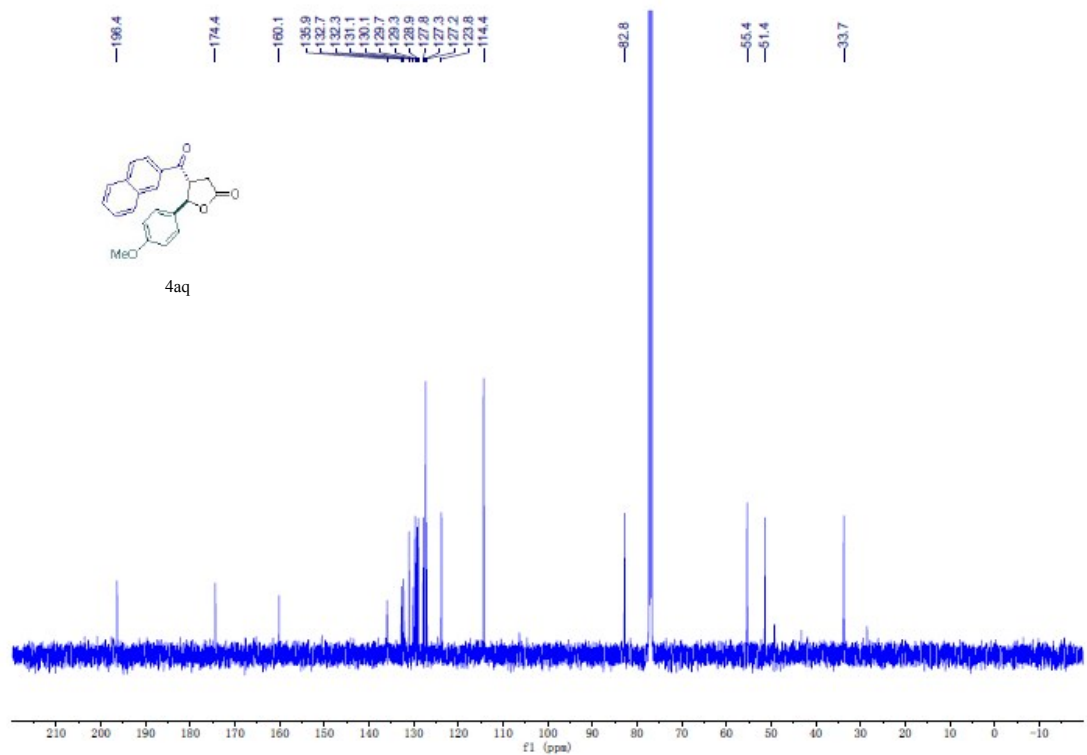

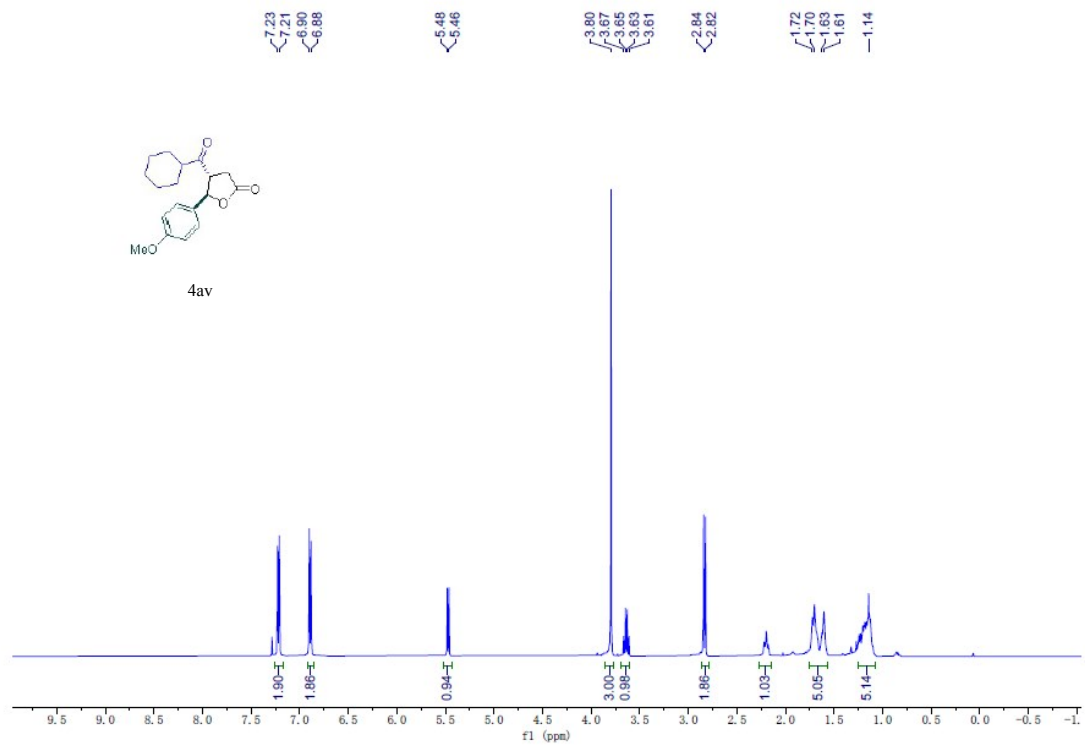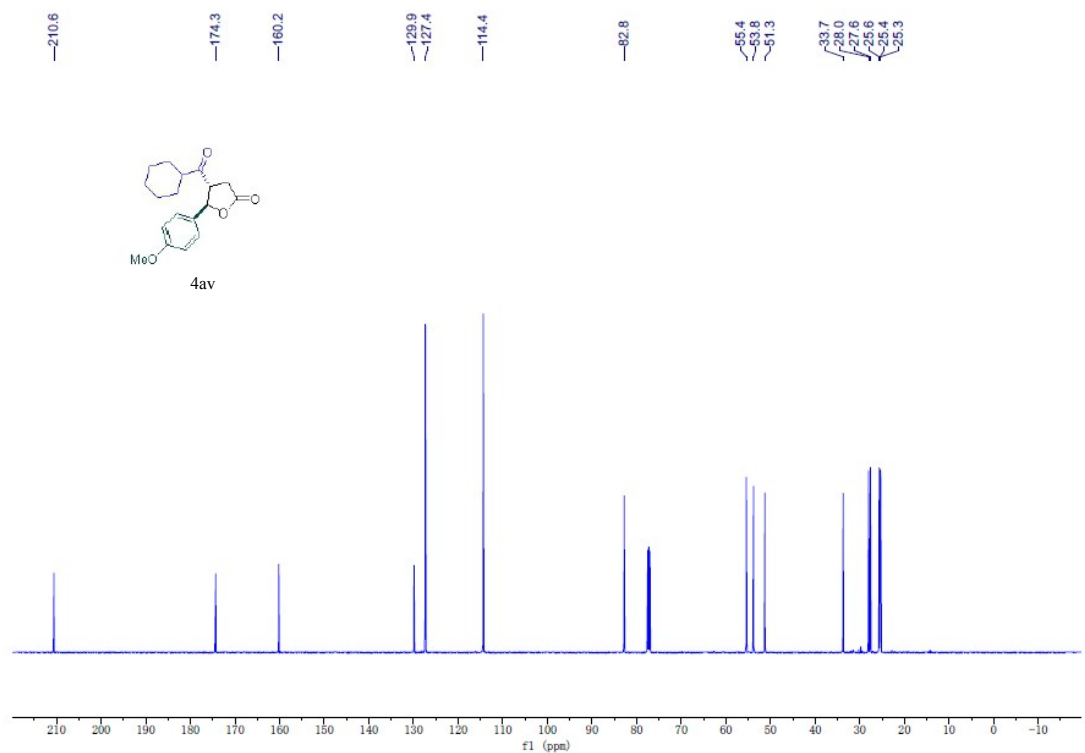

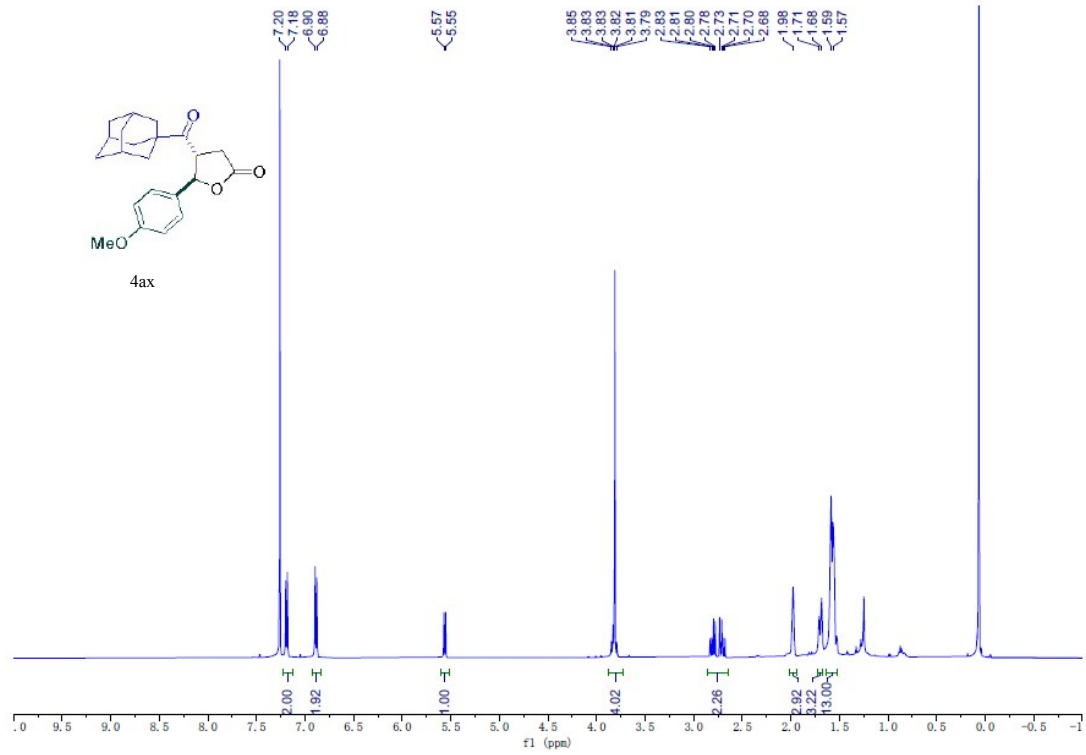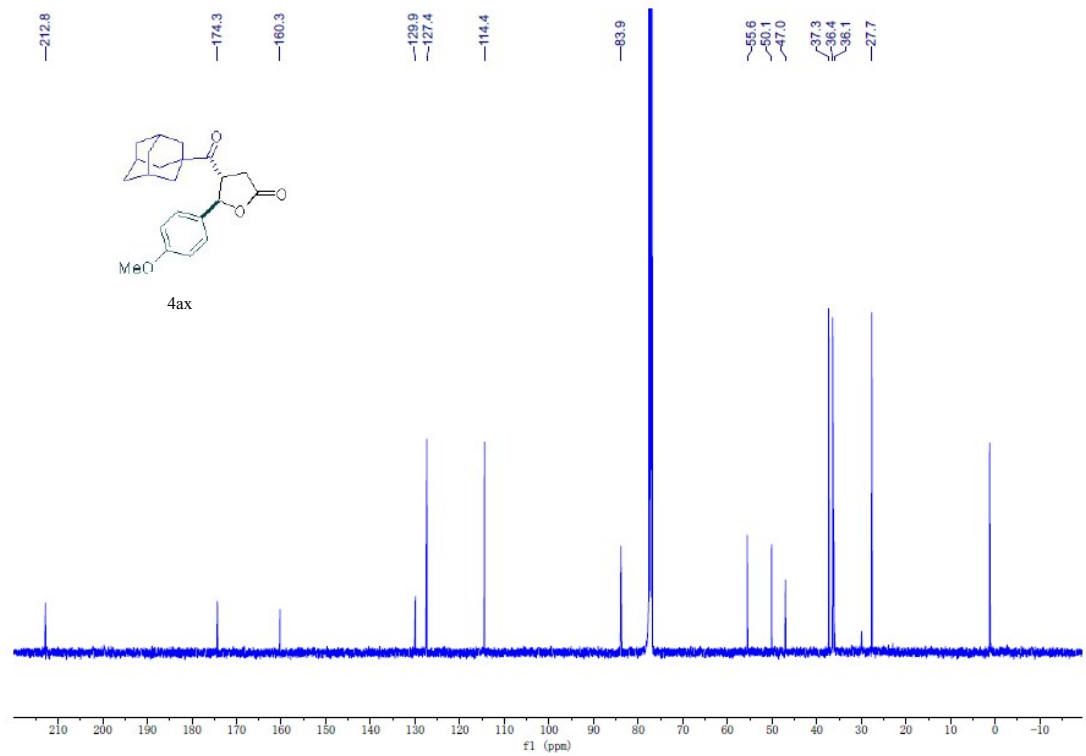

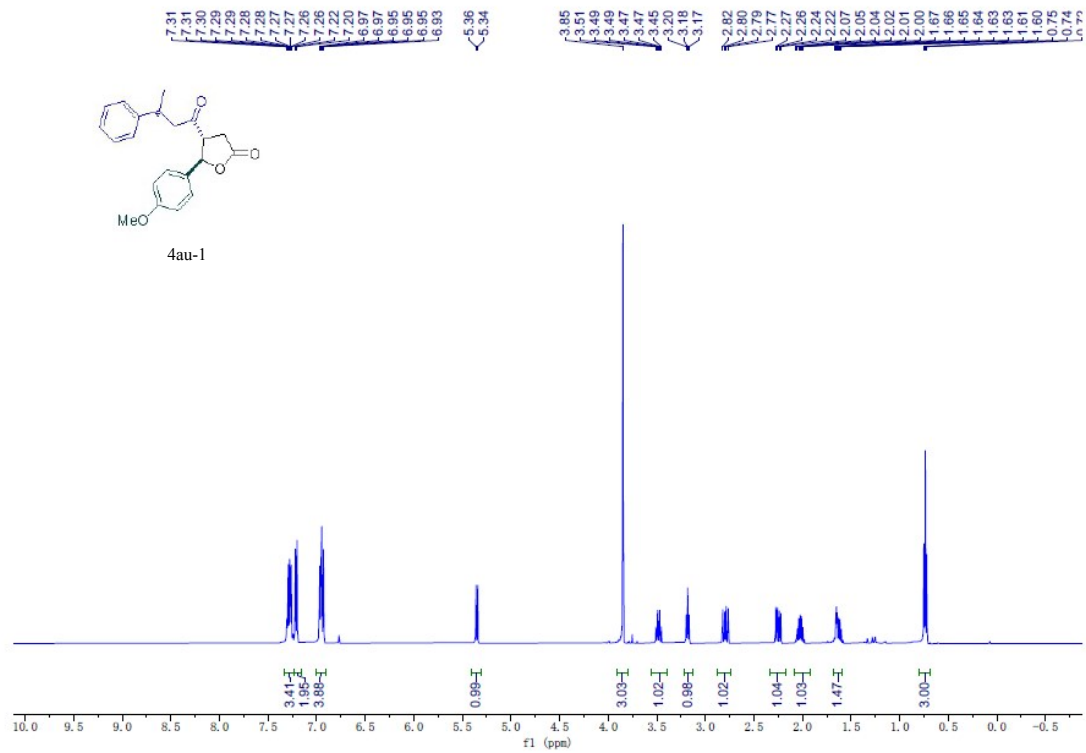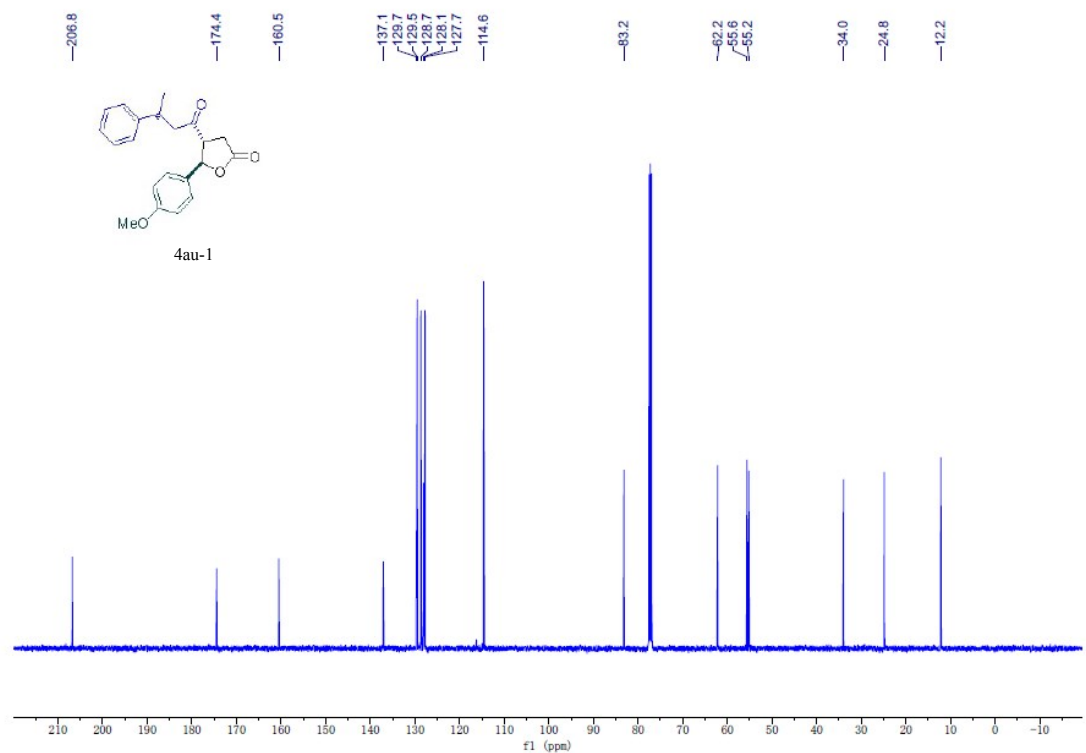

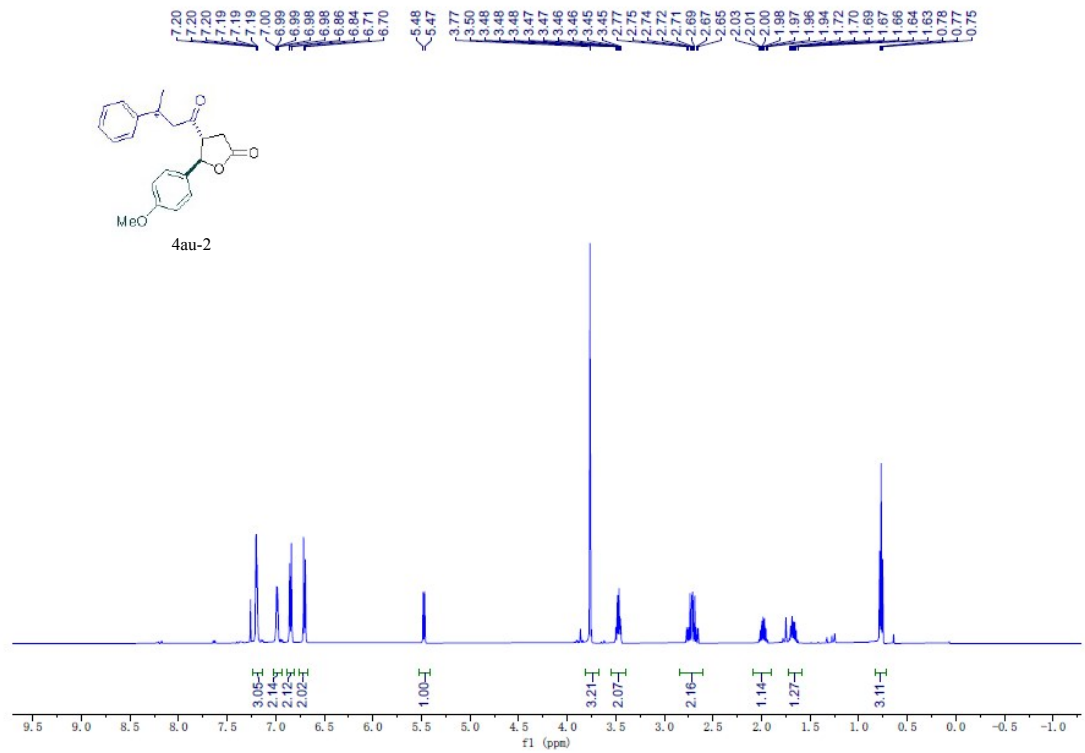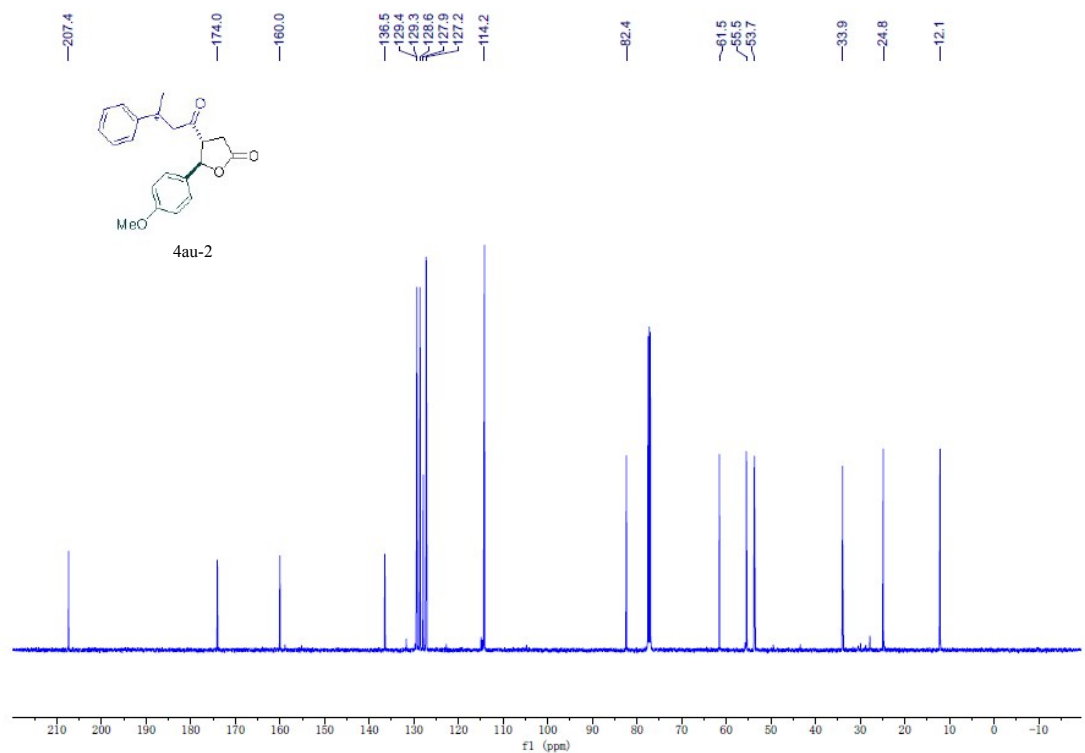

## 7.2. Copies of NMR Spectra for Compounds of 4ba-4la

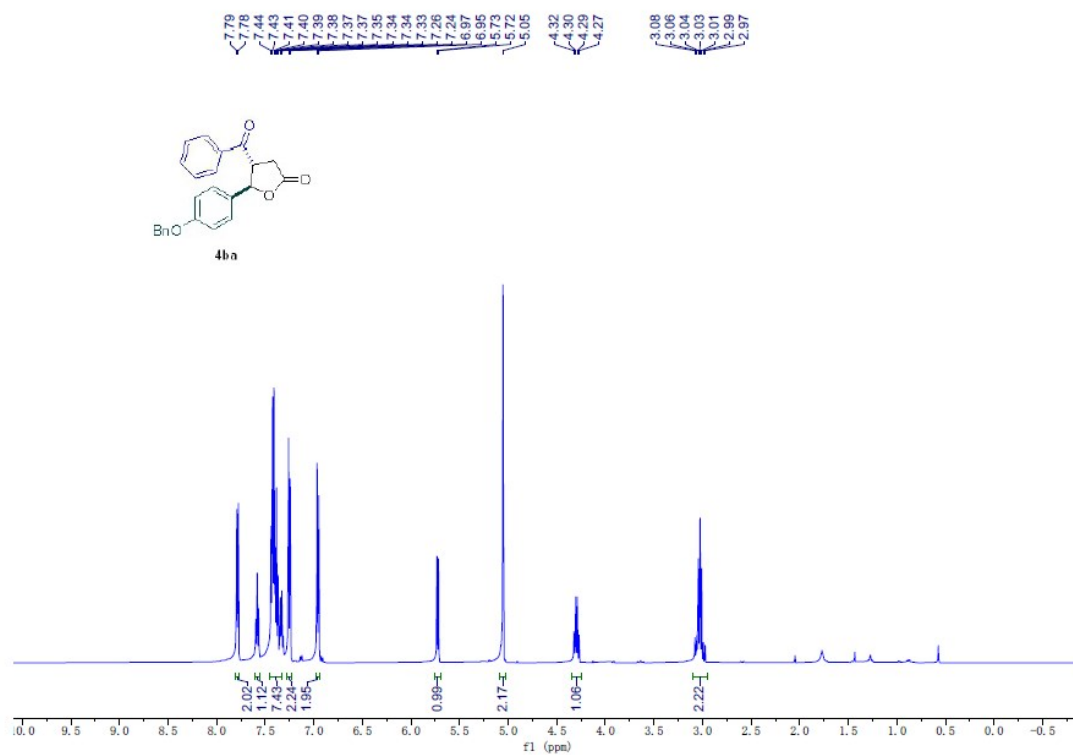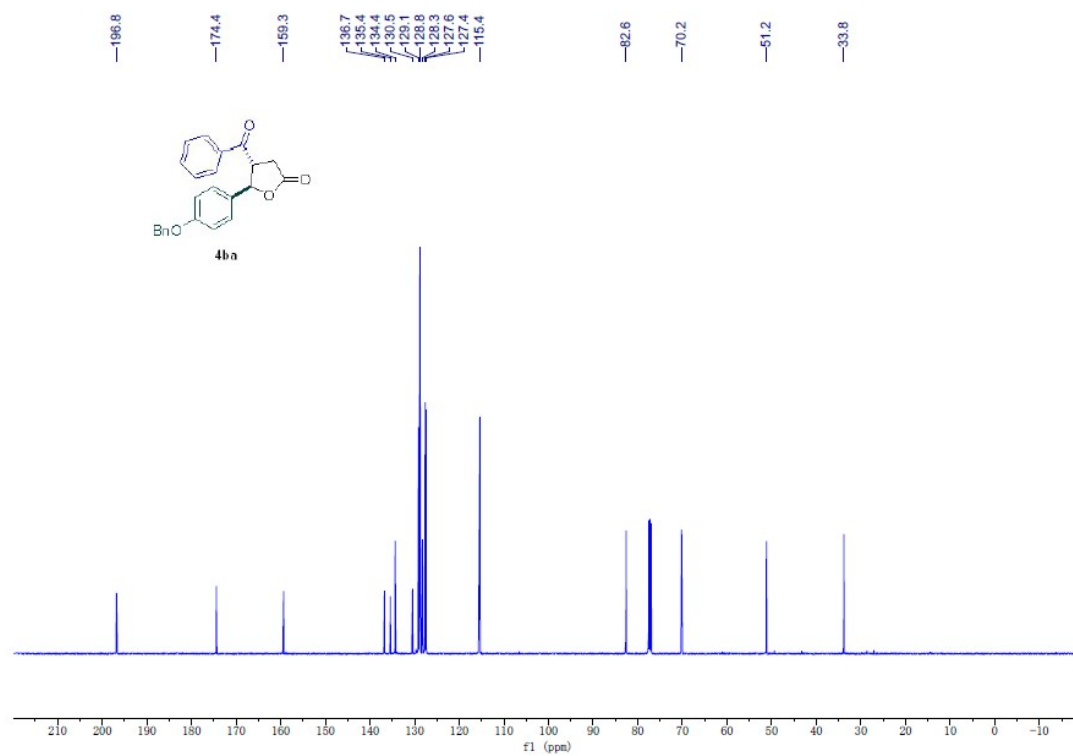

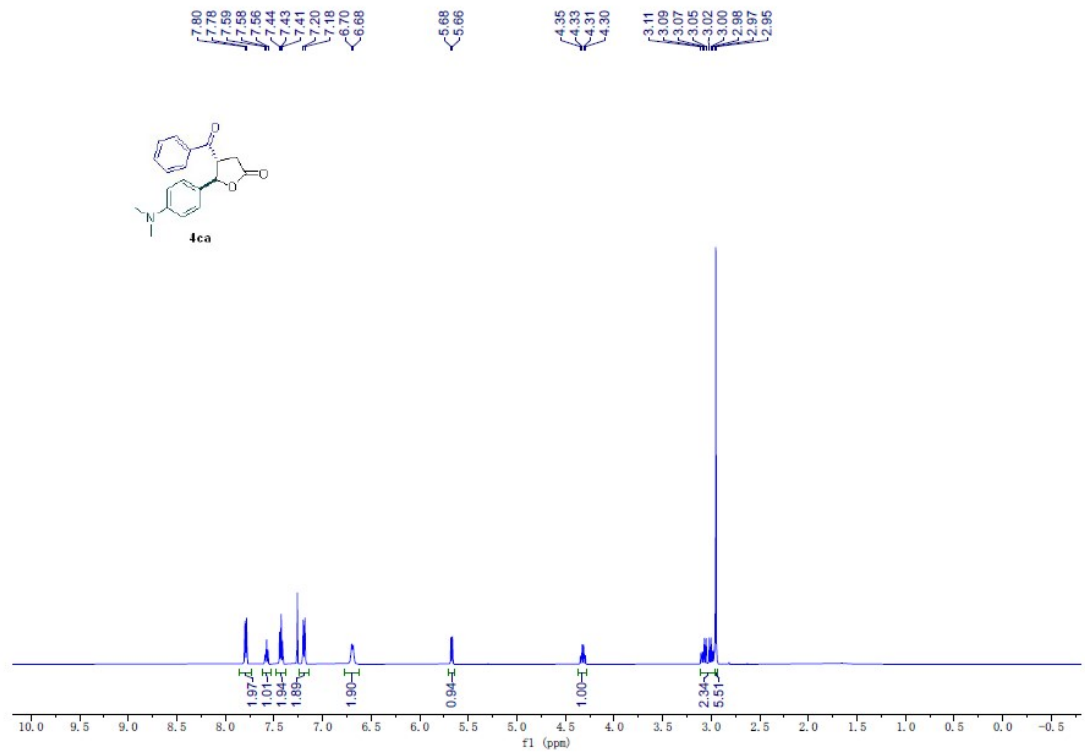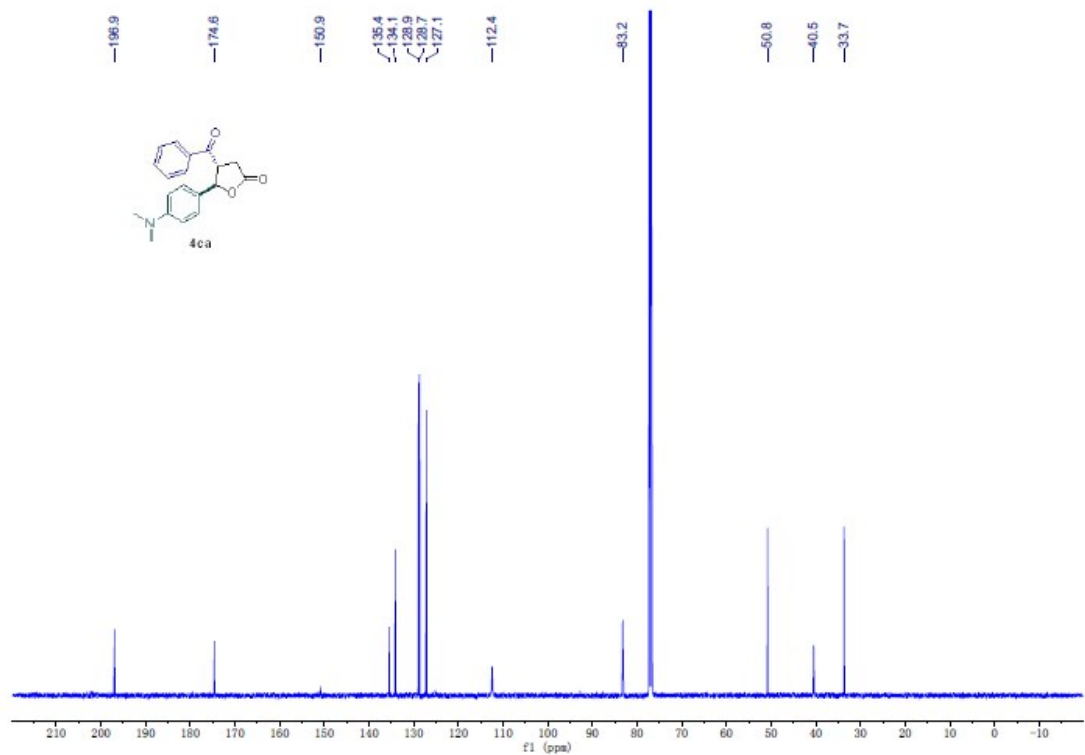



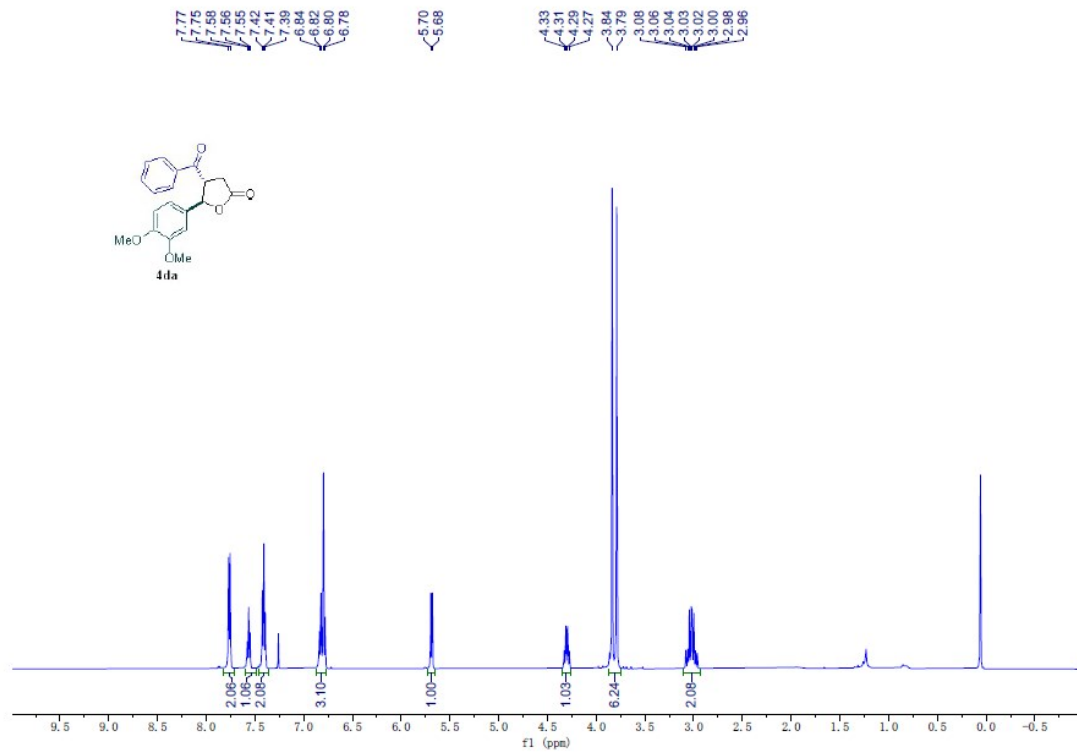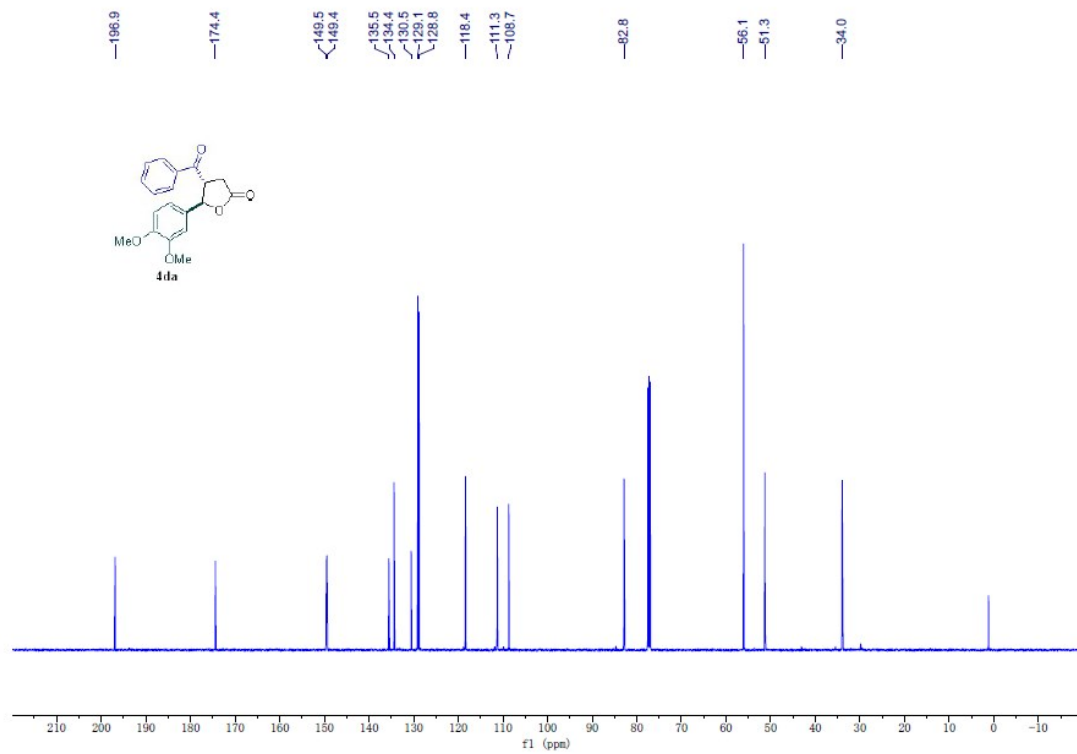

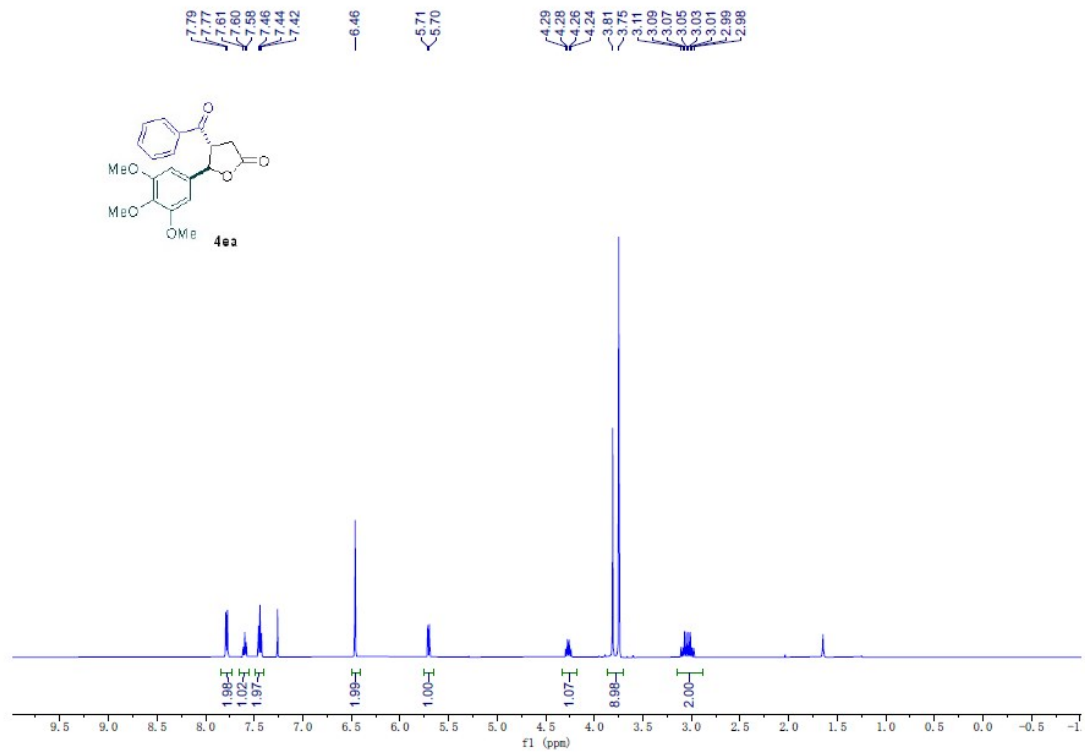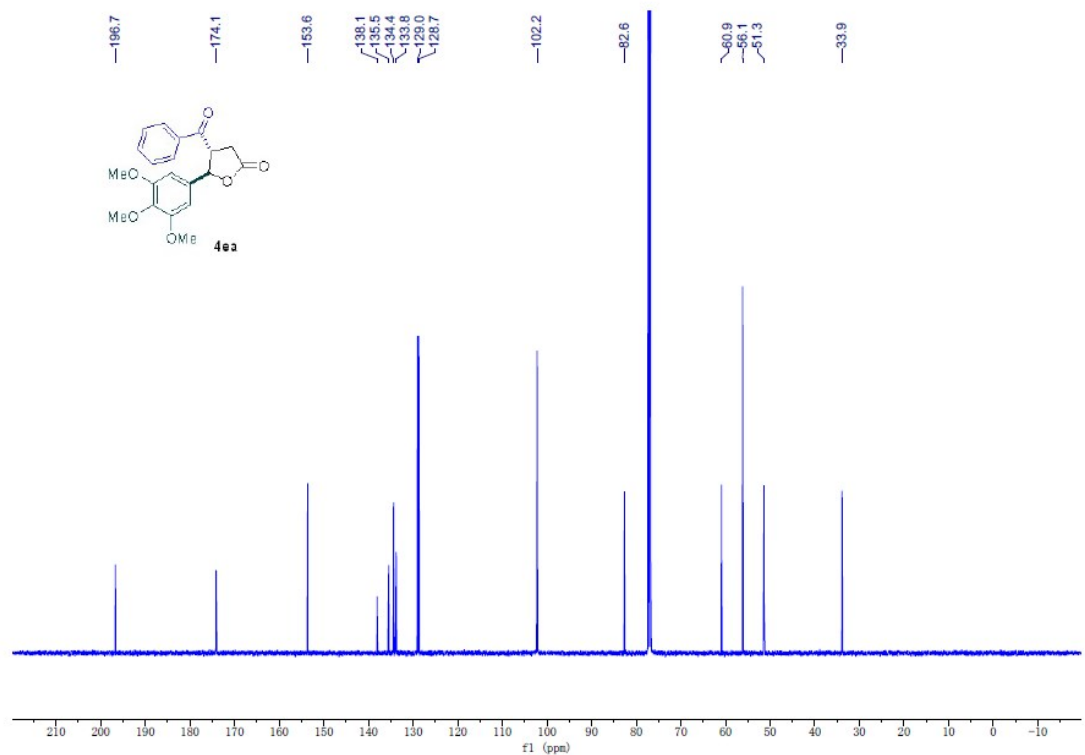

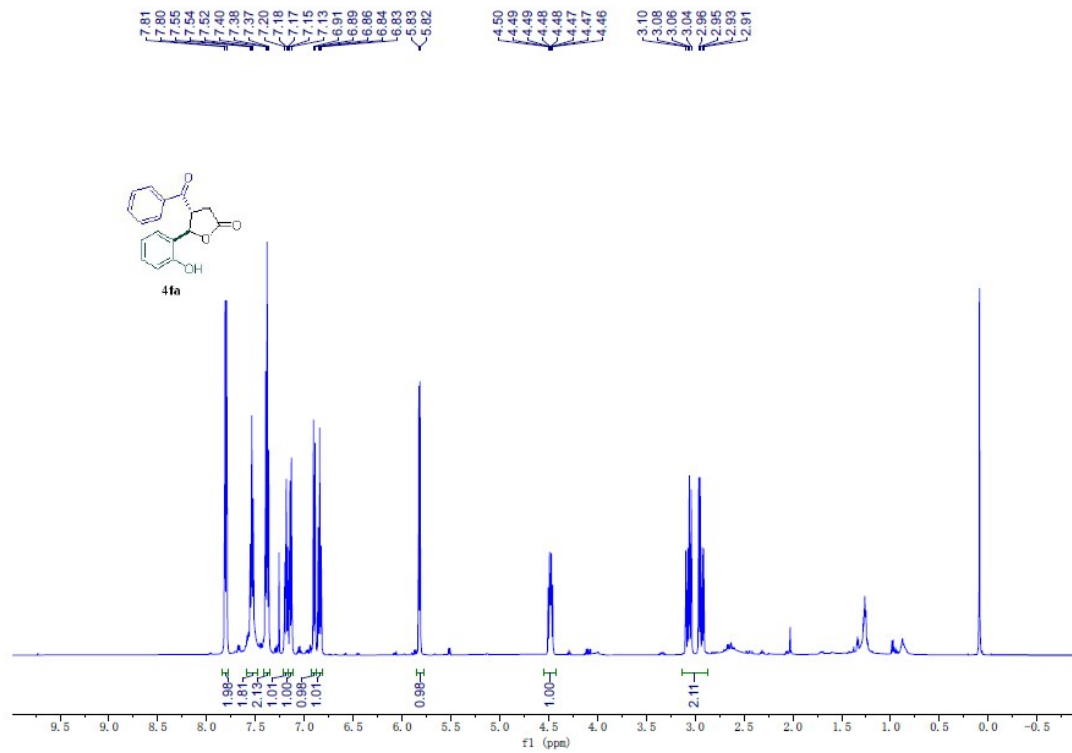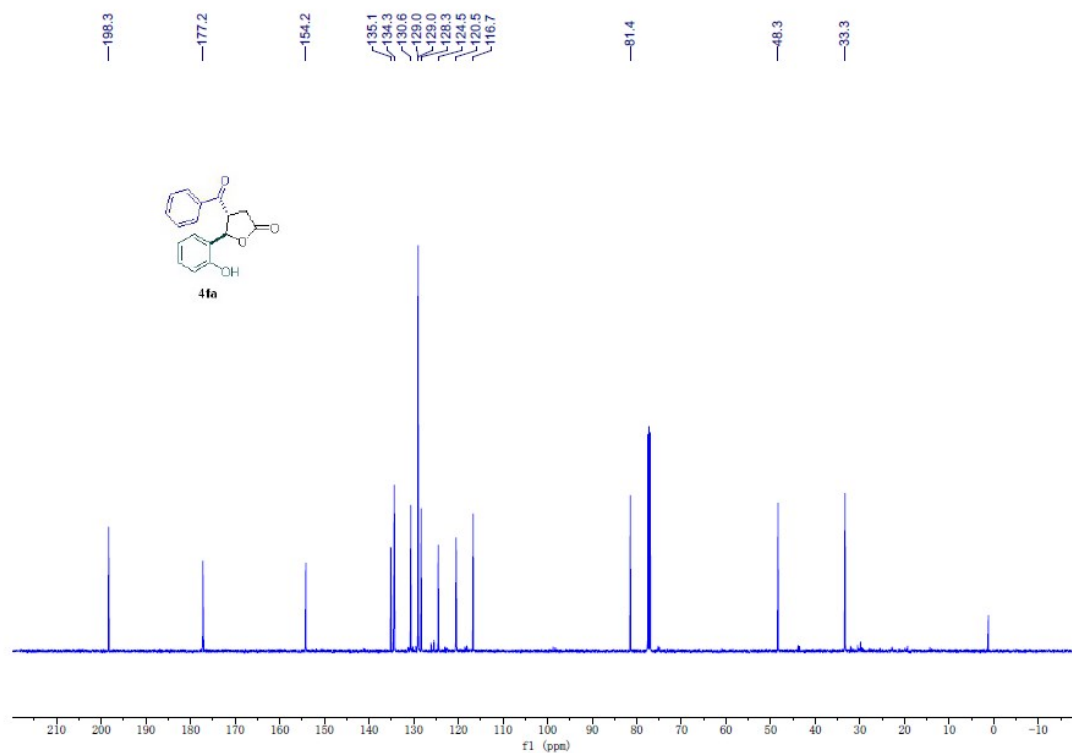

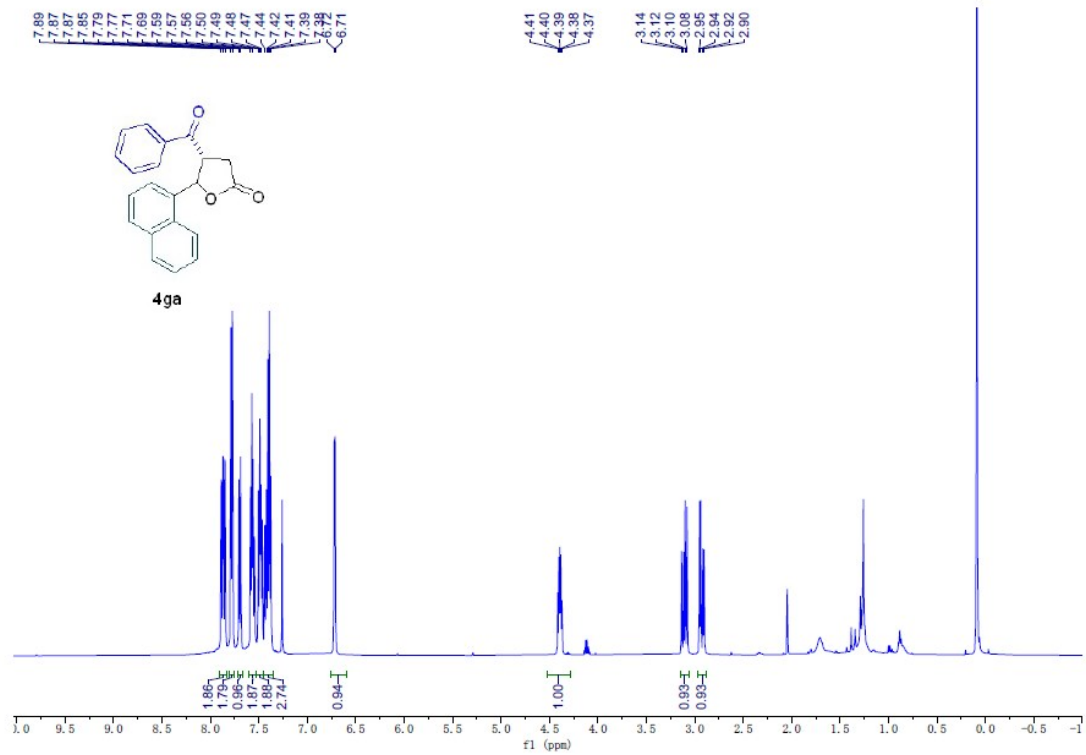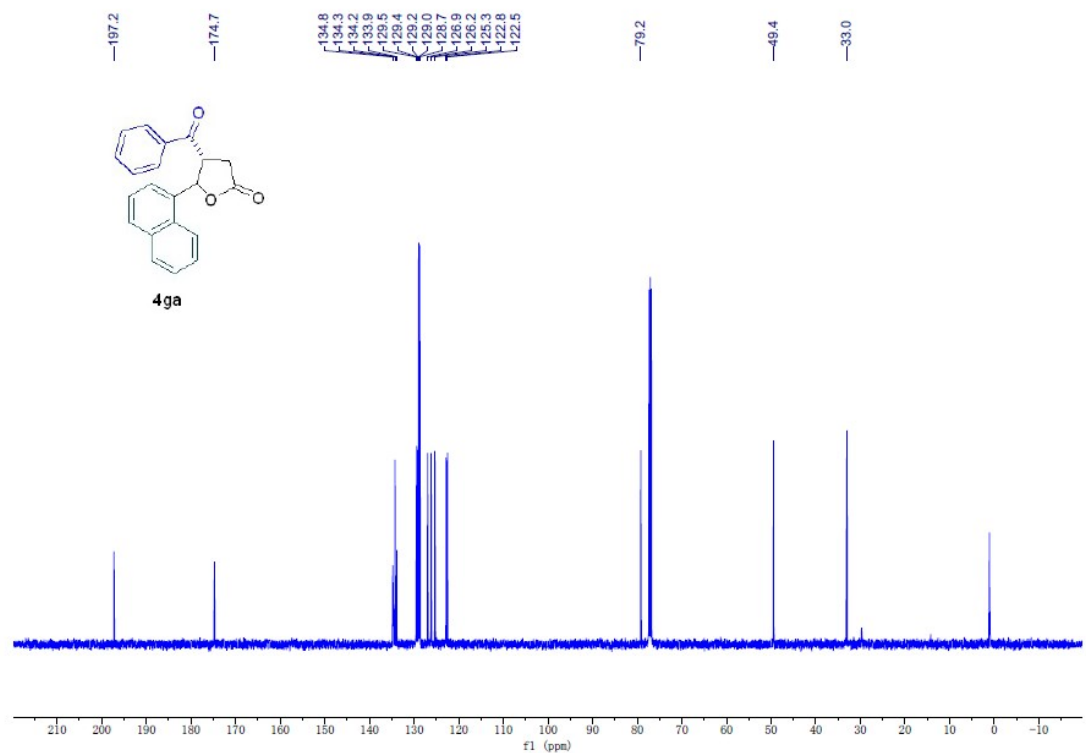

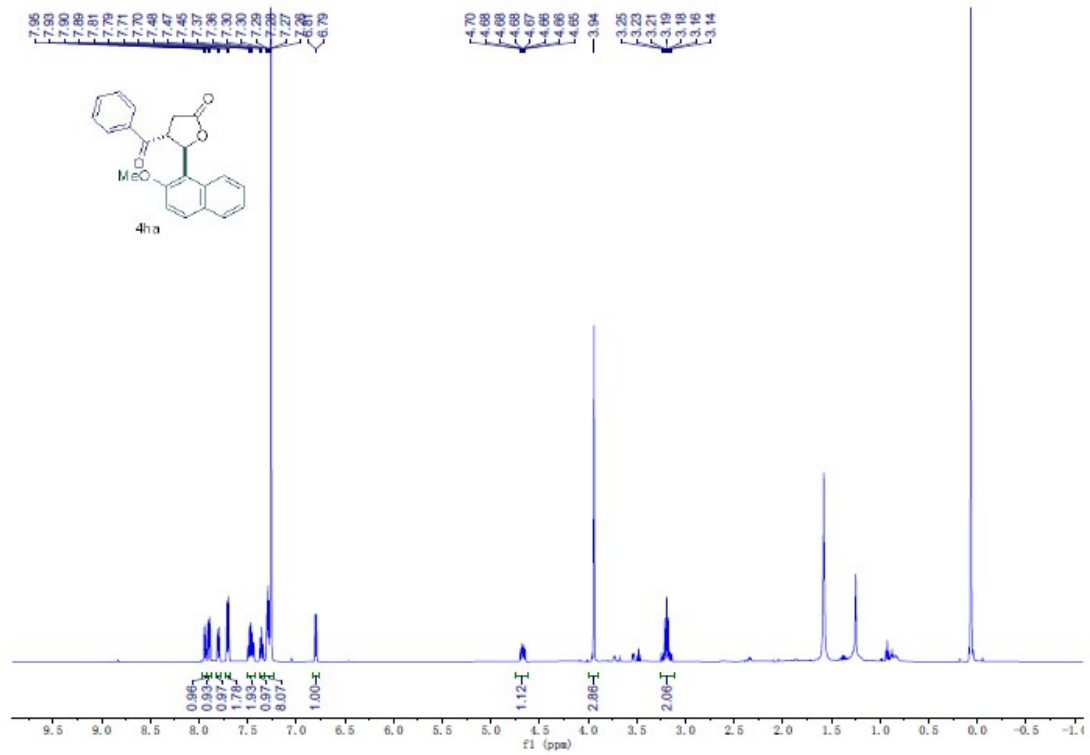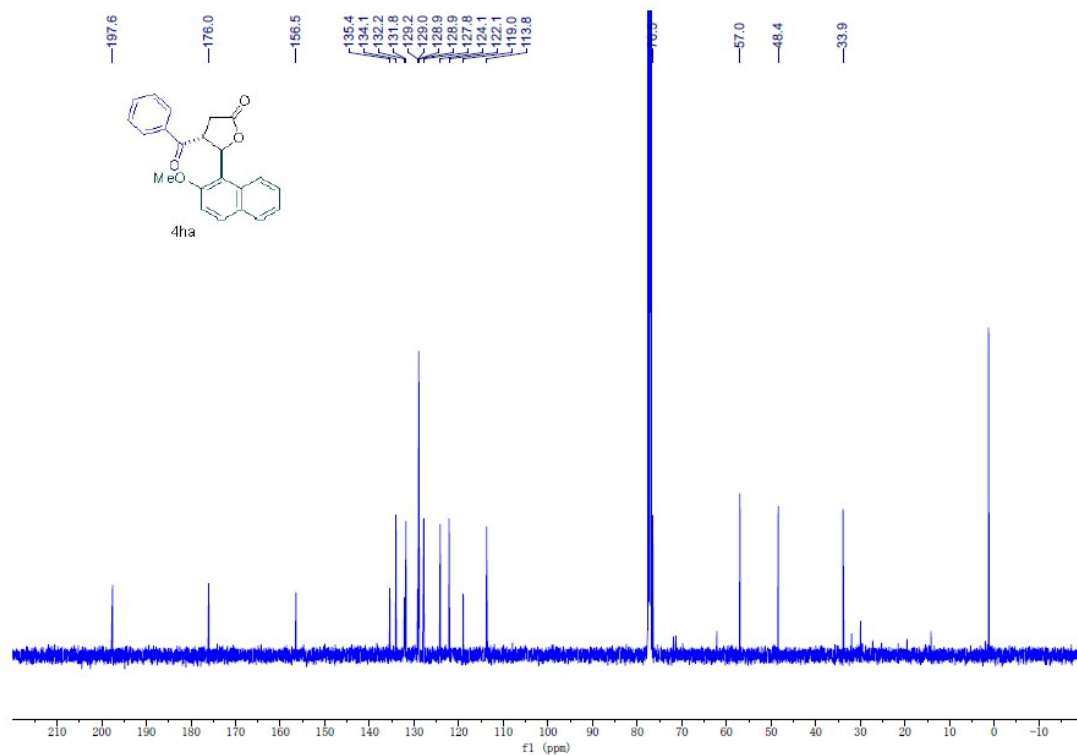

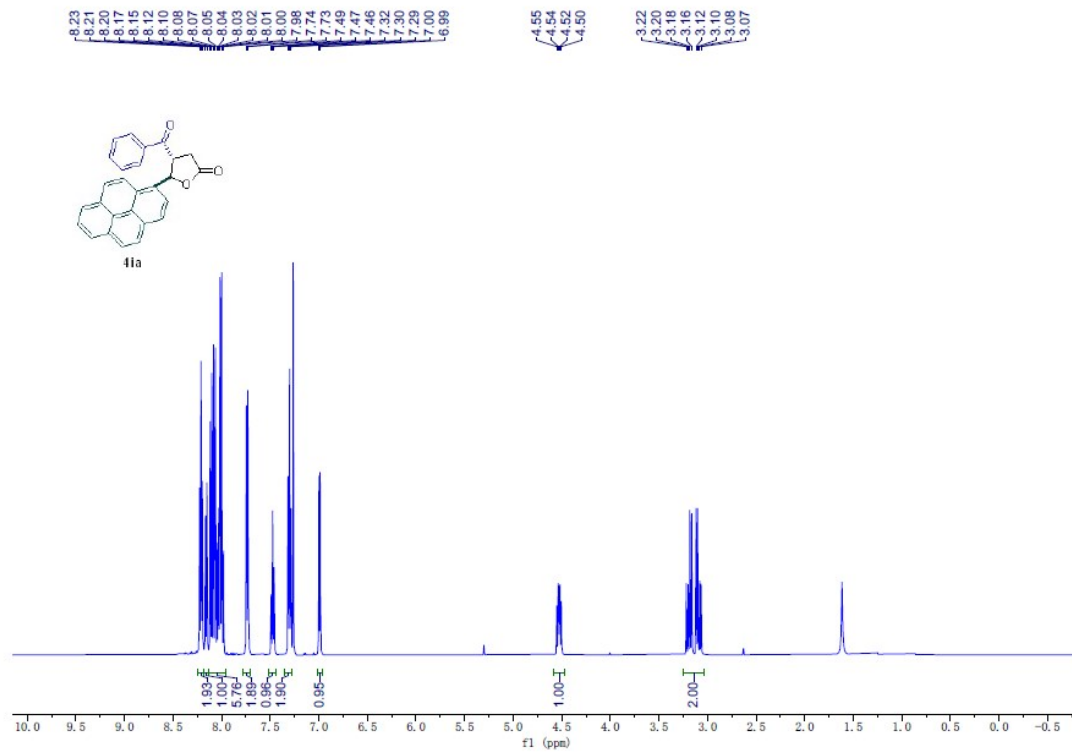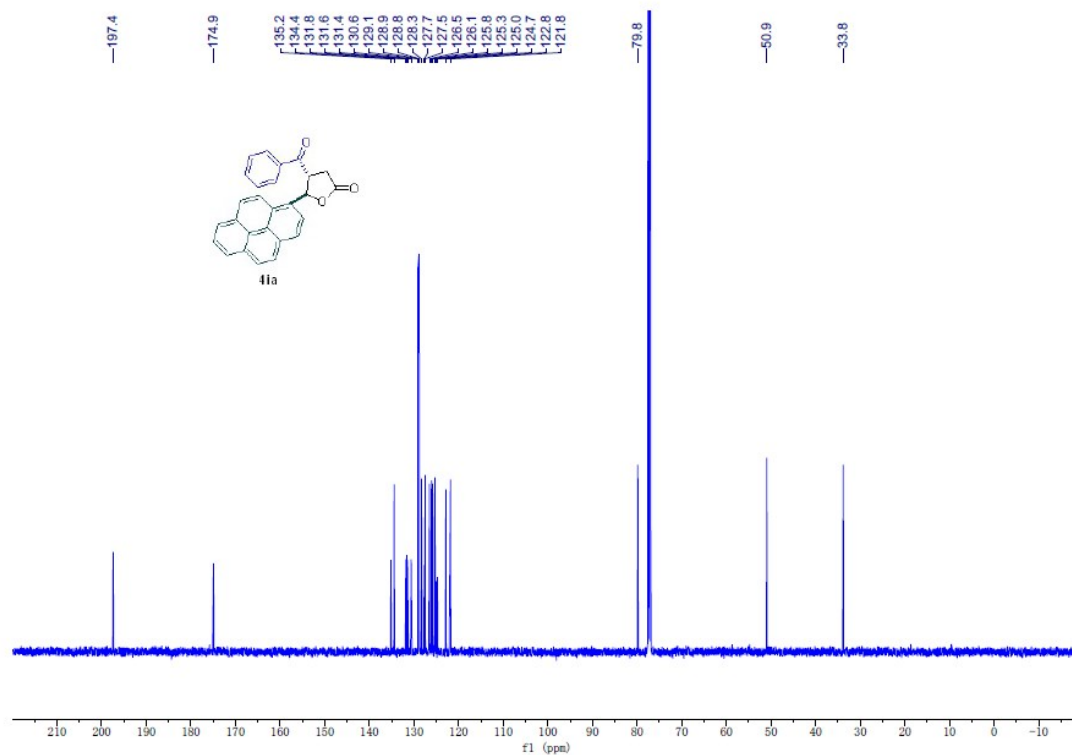

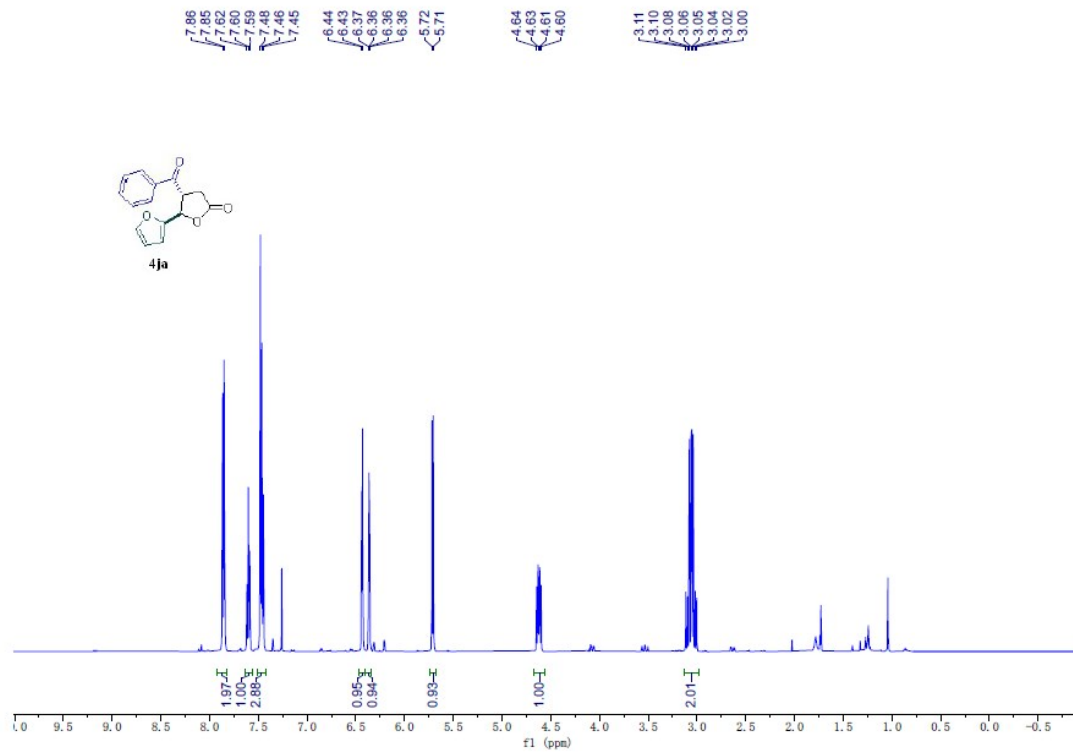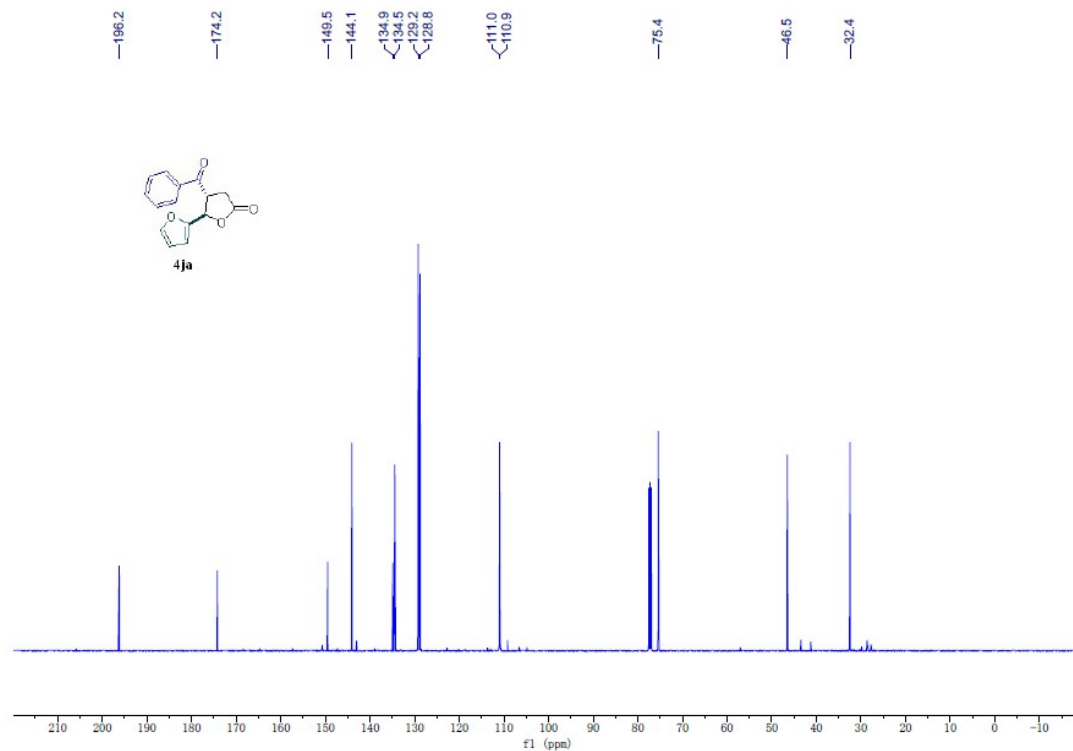

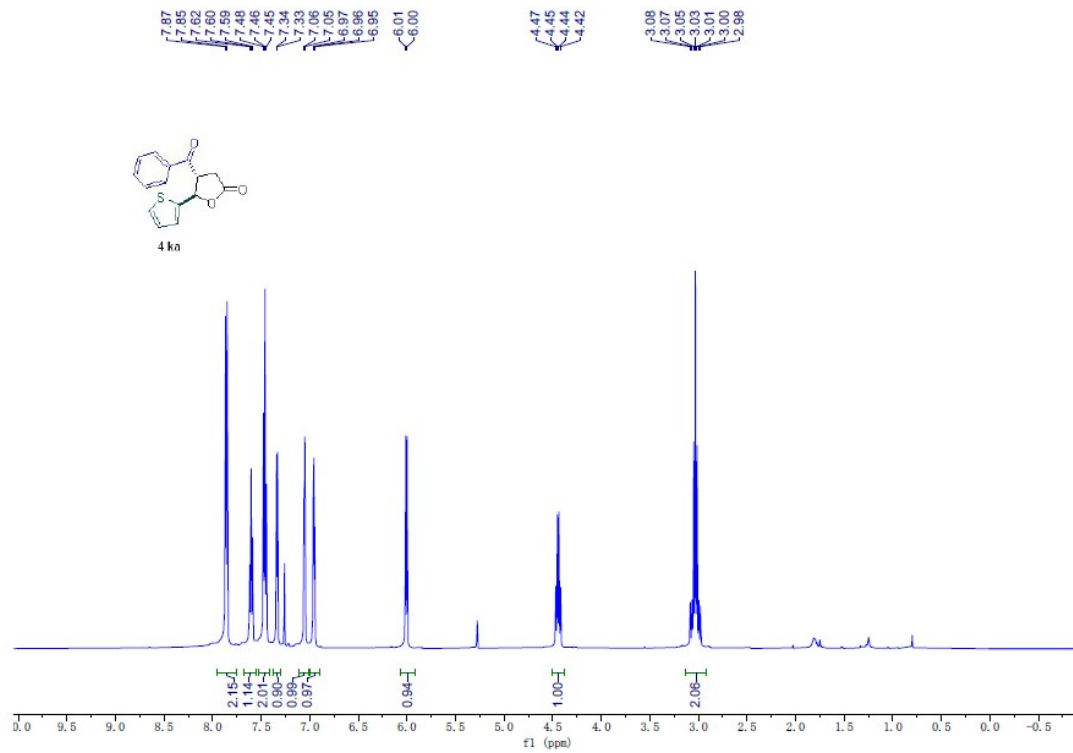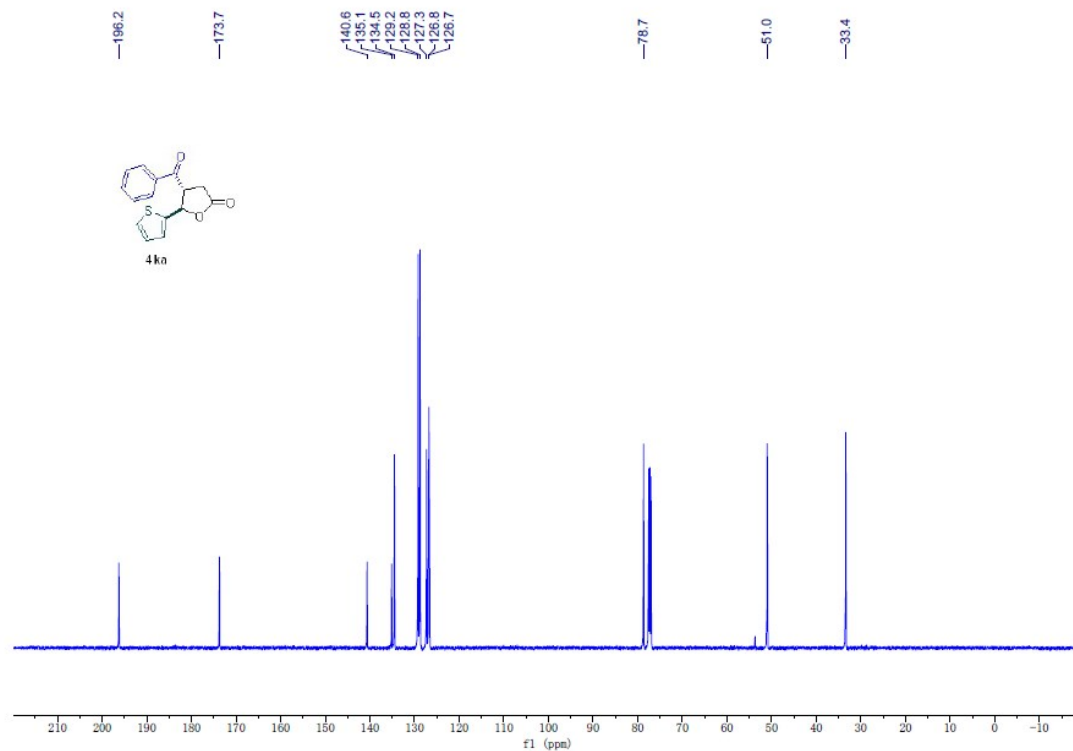



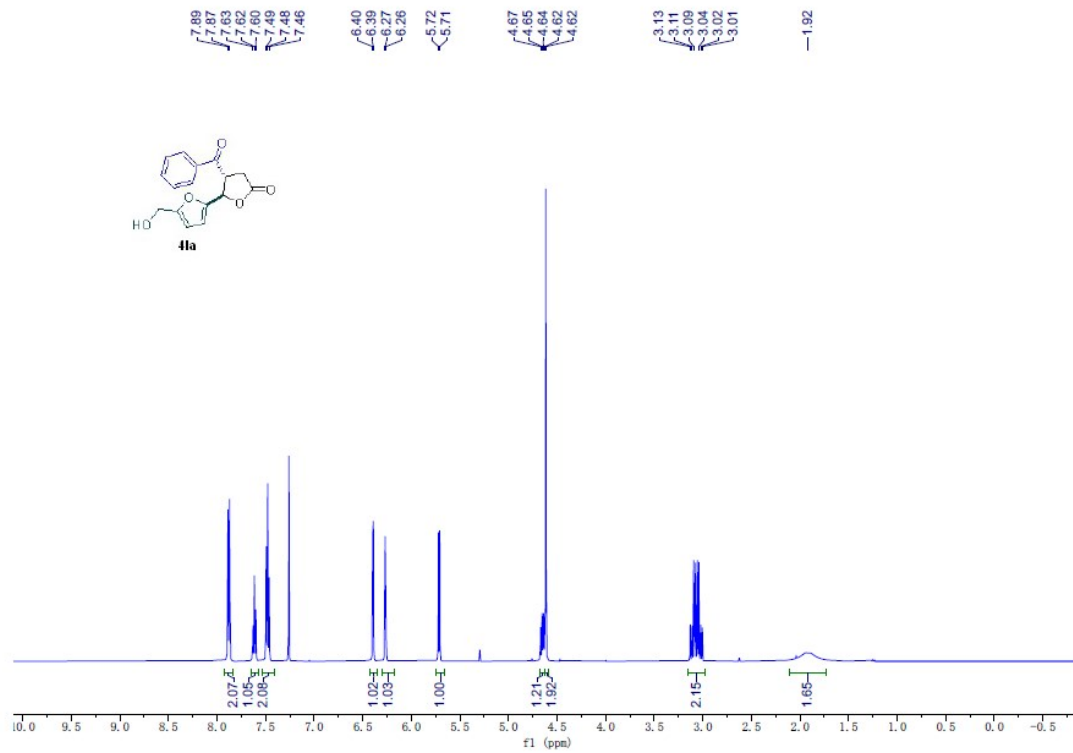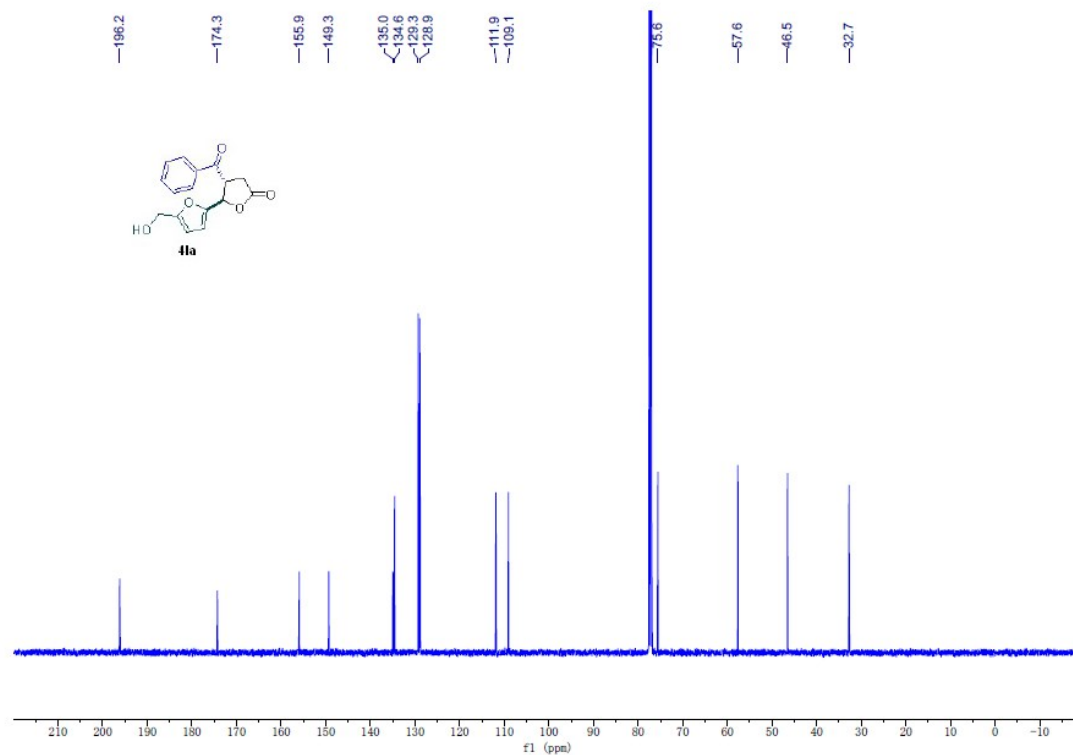

### 7.3. Copies of NMR Spectra for Compounds of 5ma-5j'a

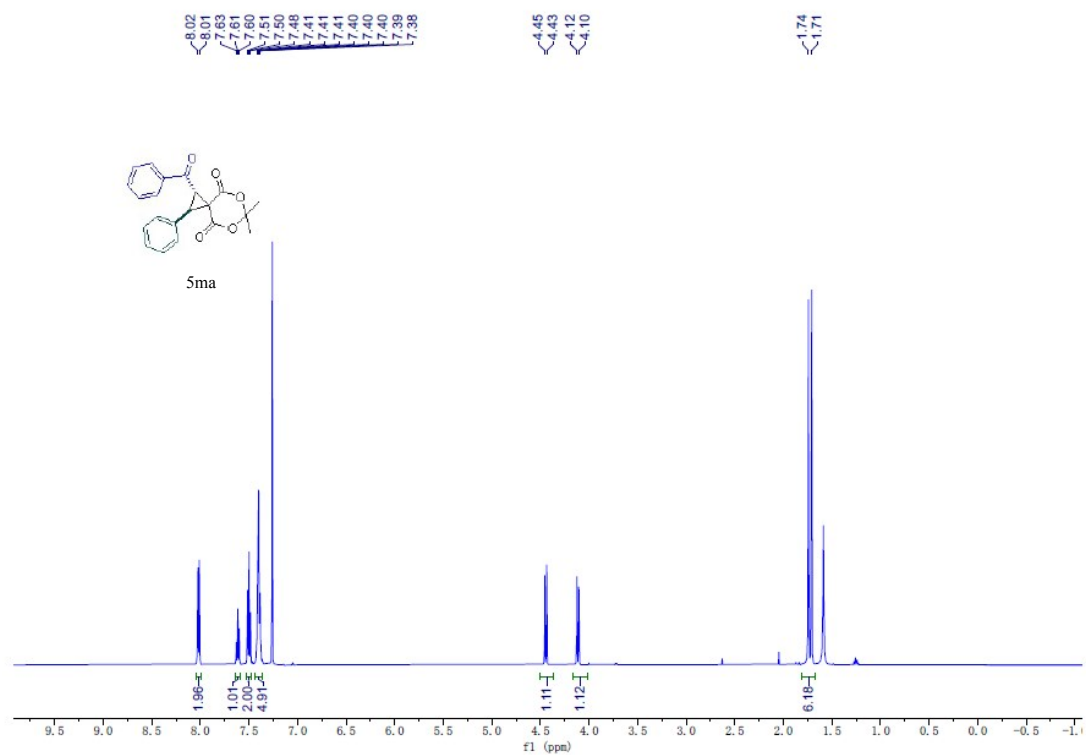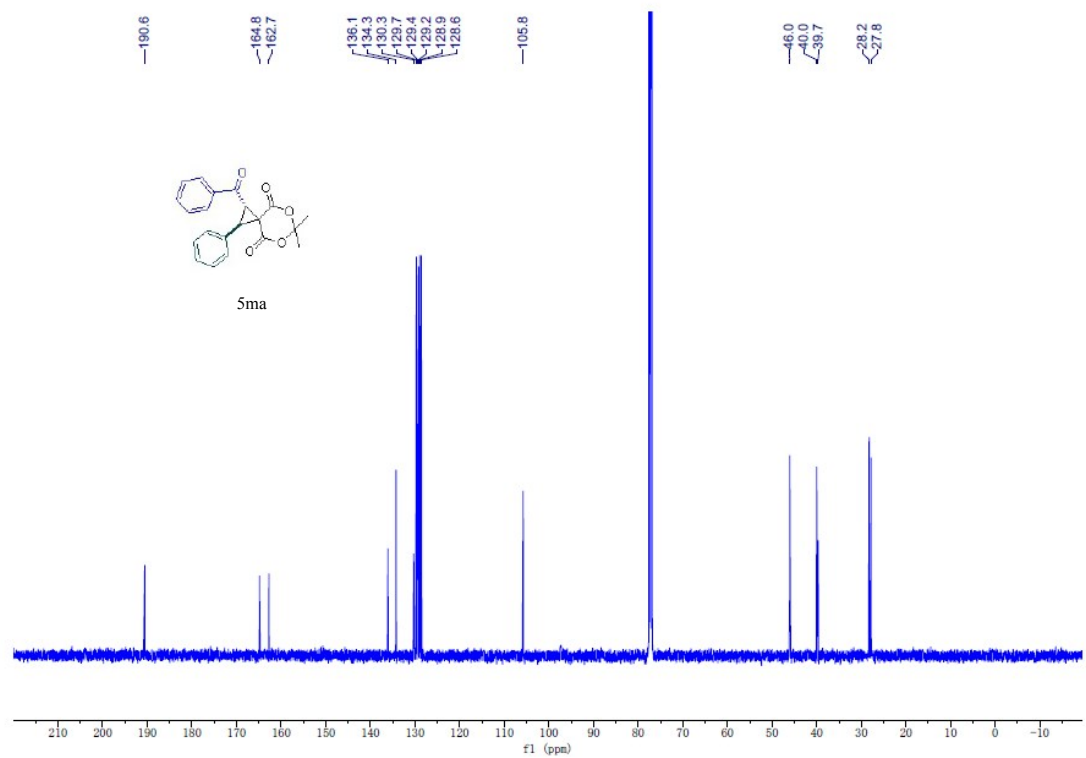

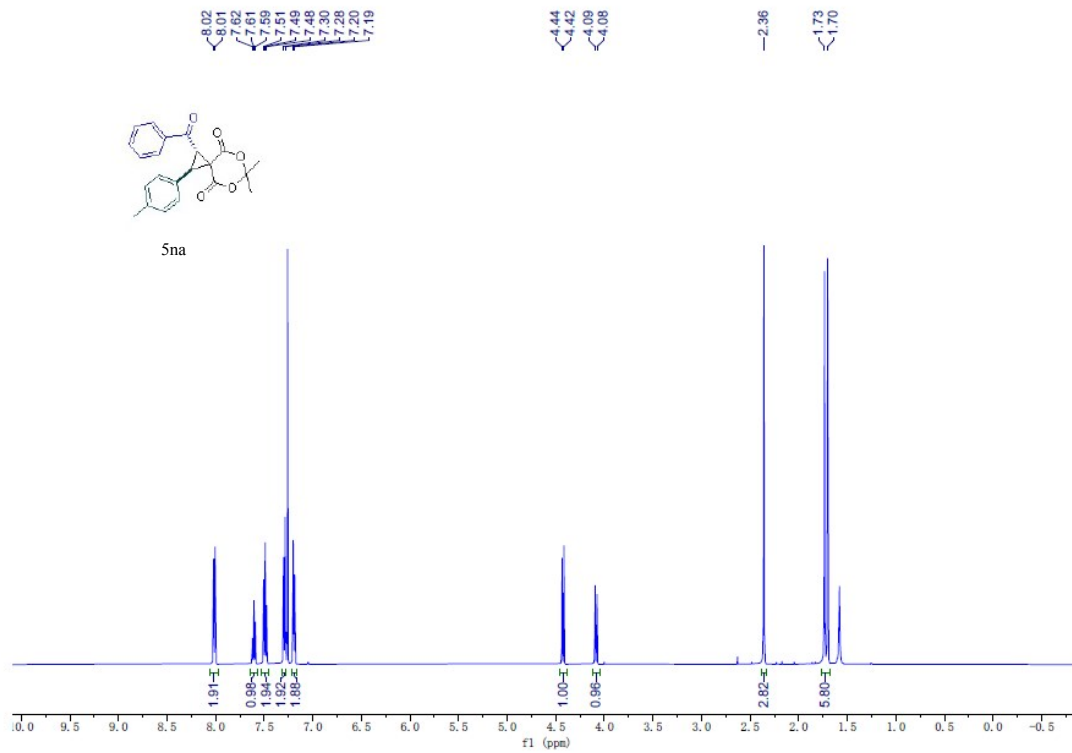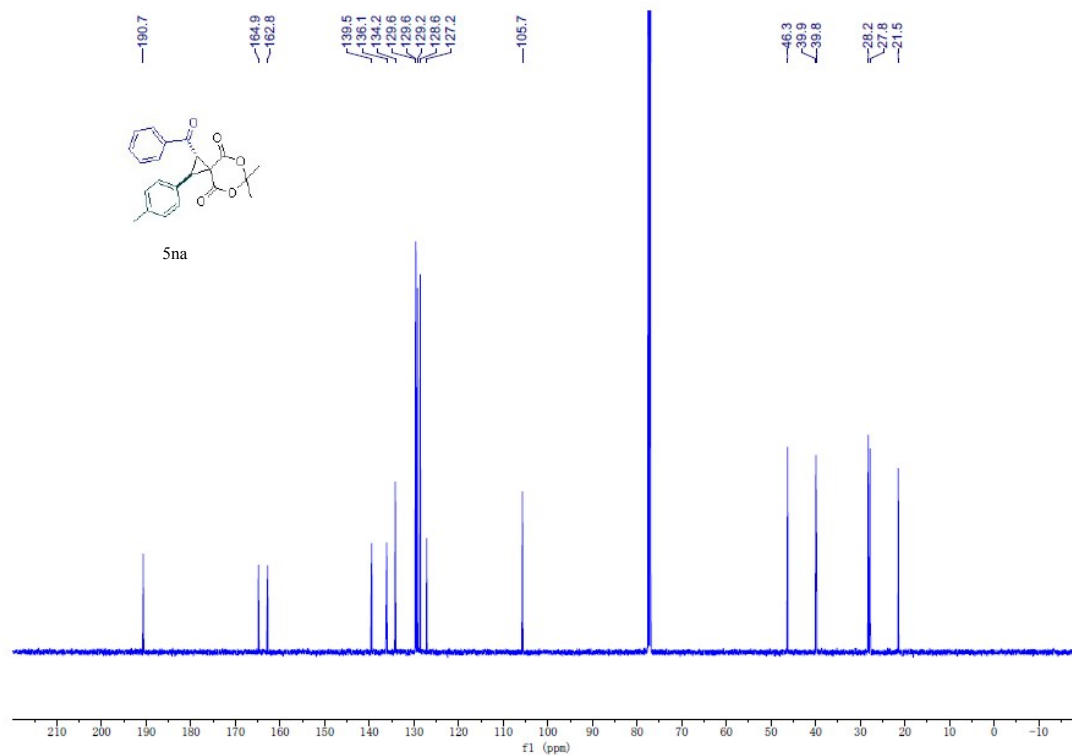

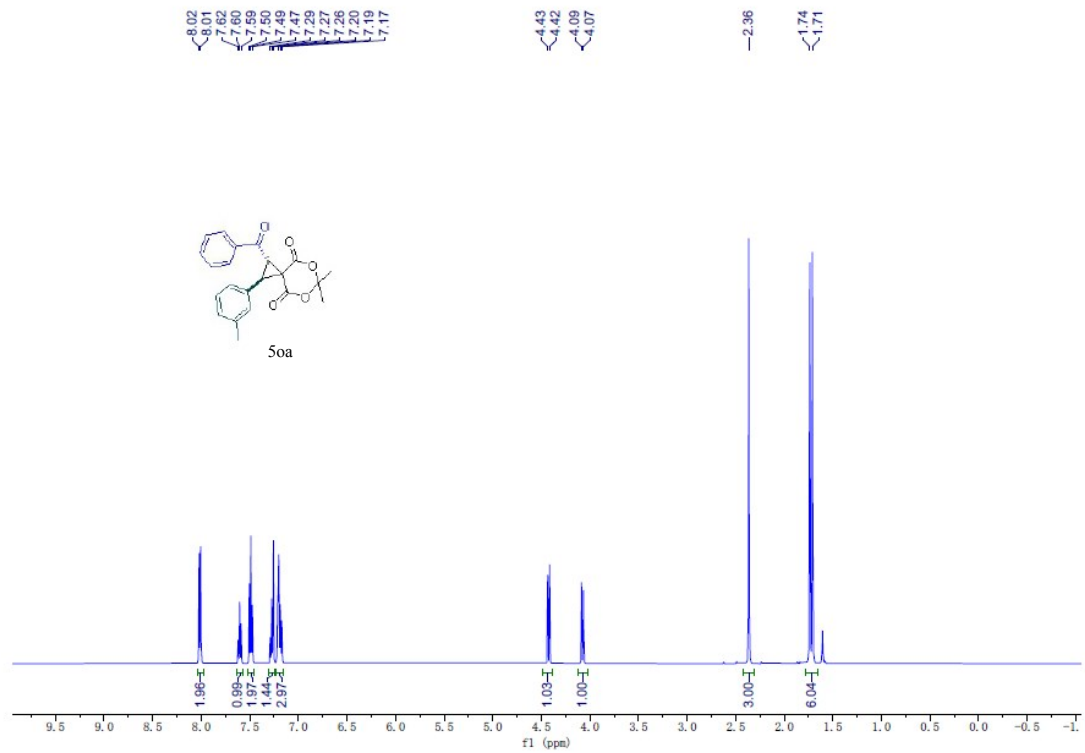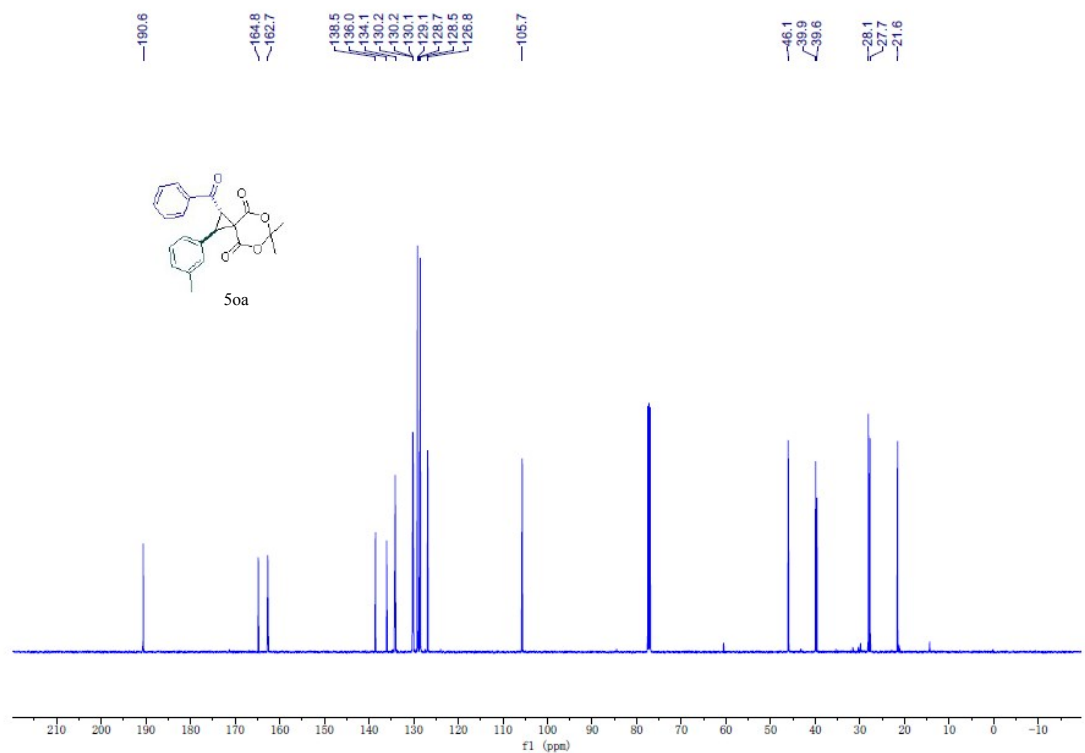

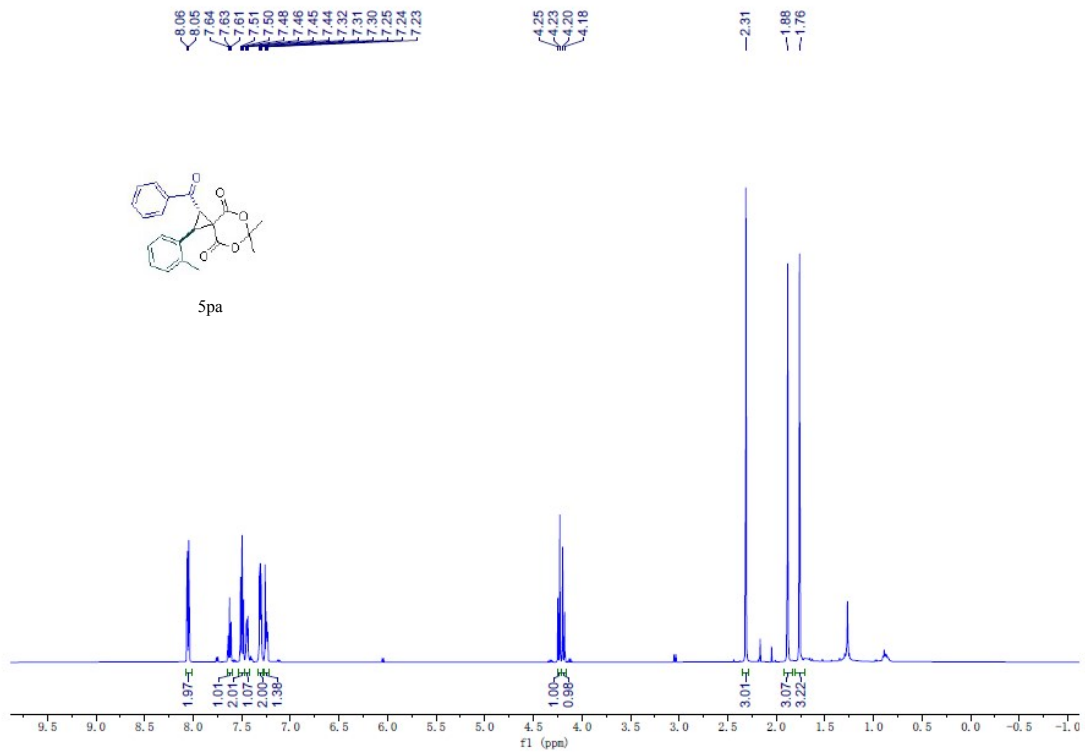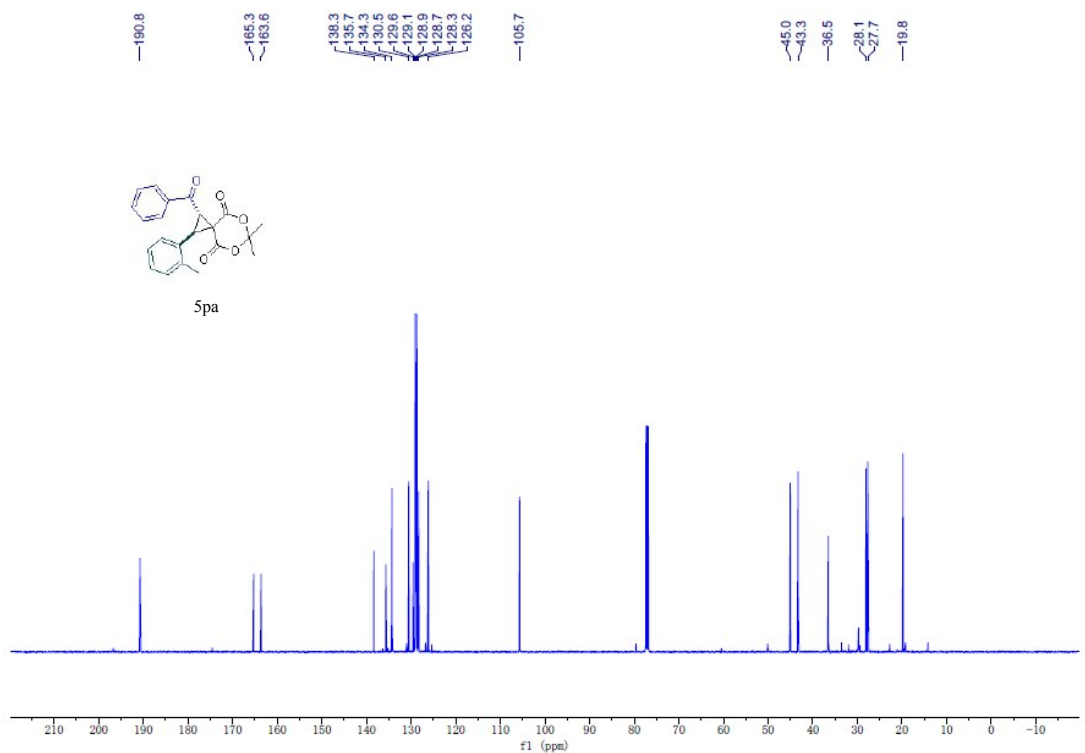

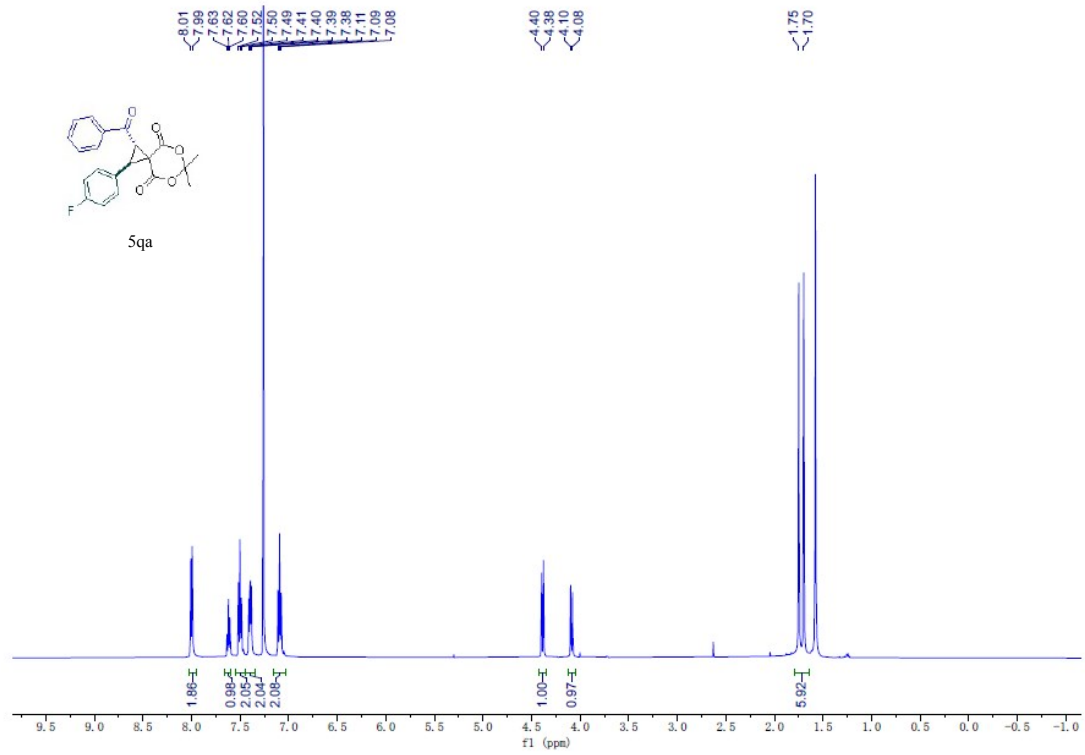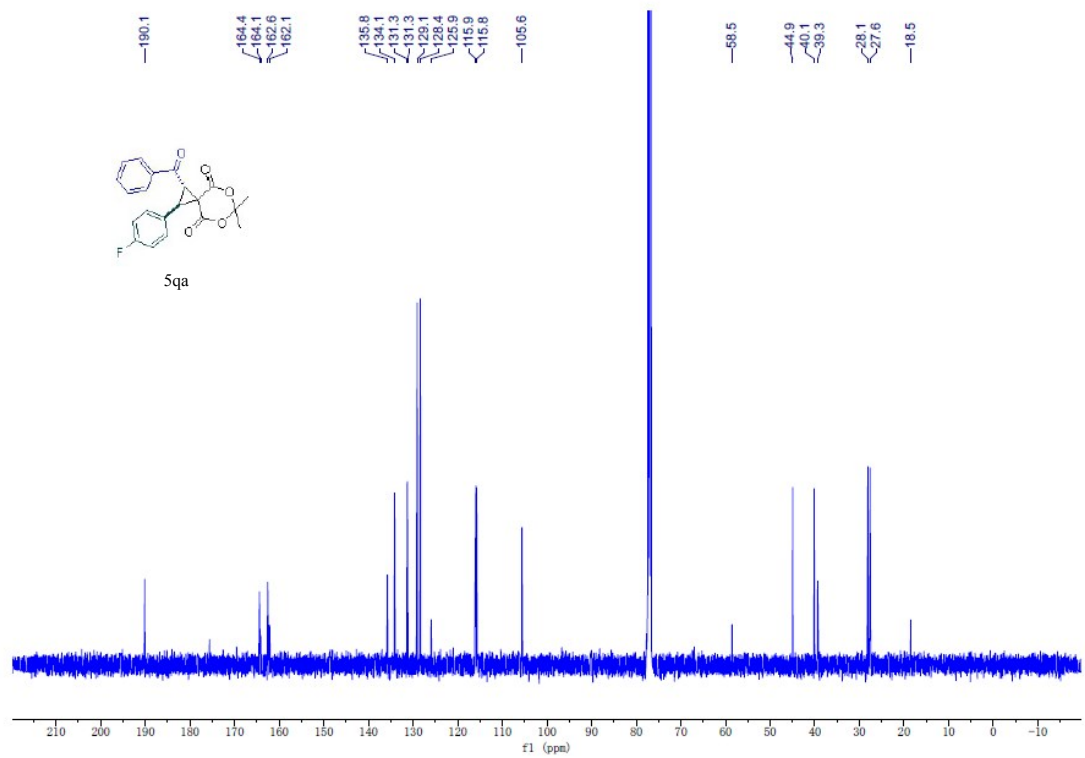

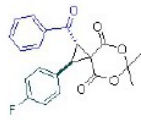

5qa

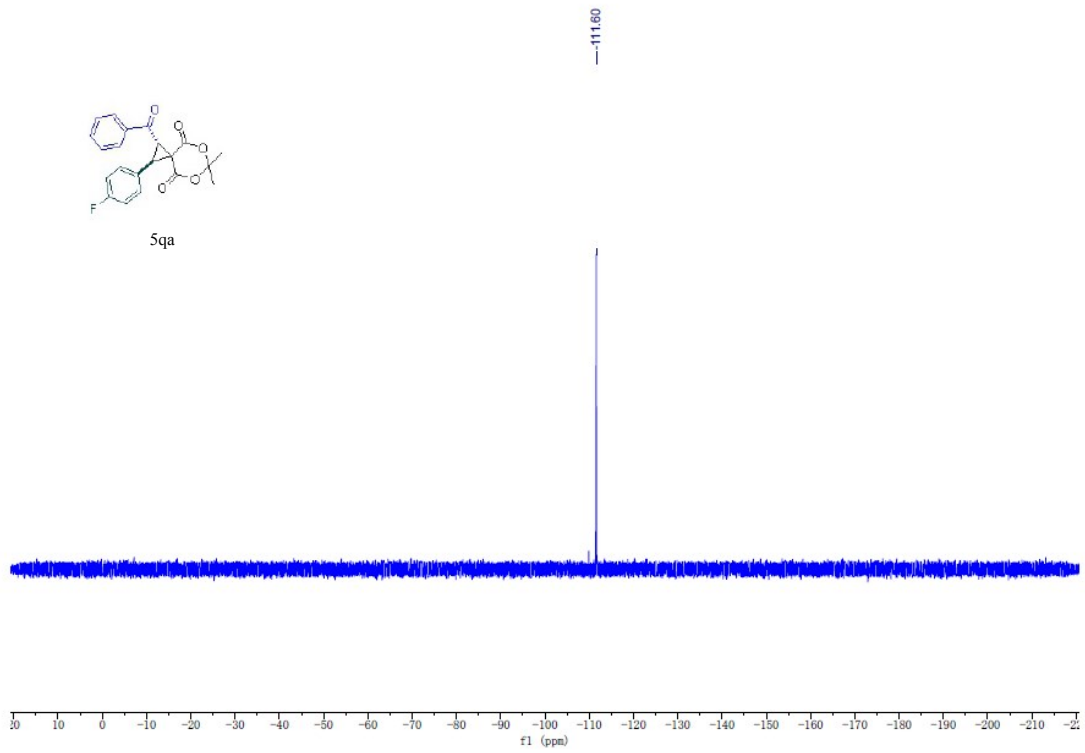

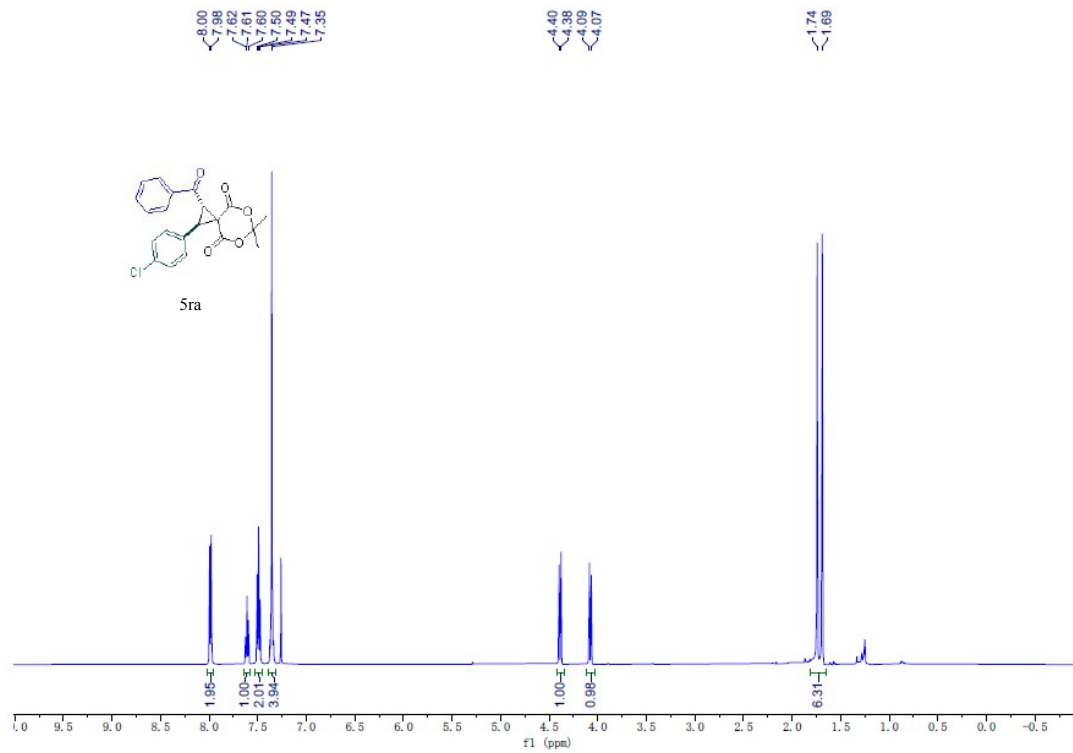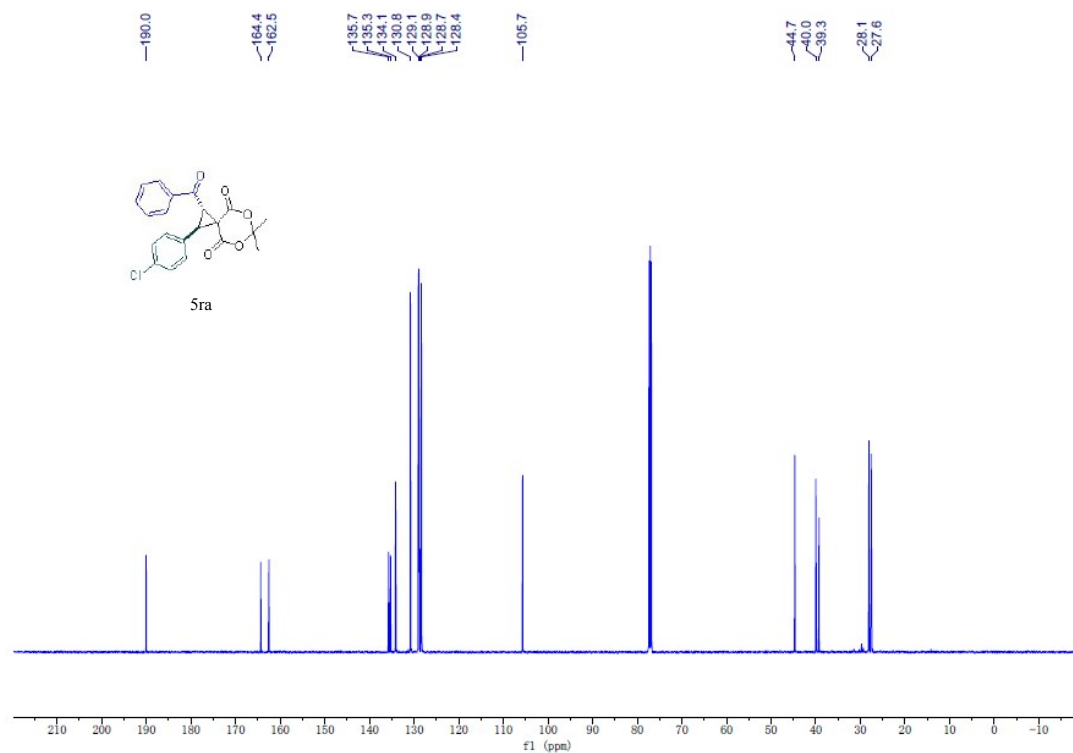



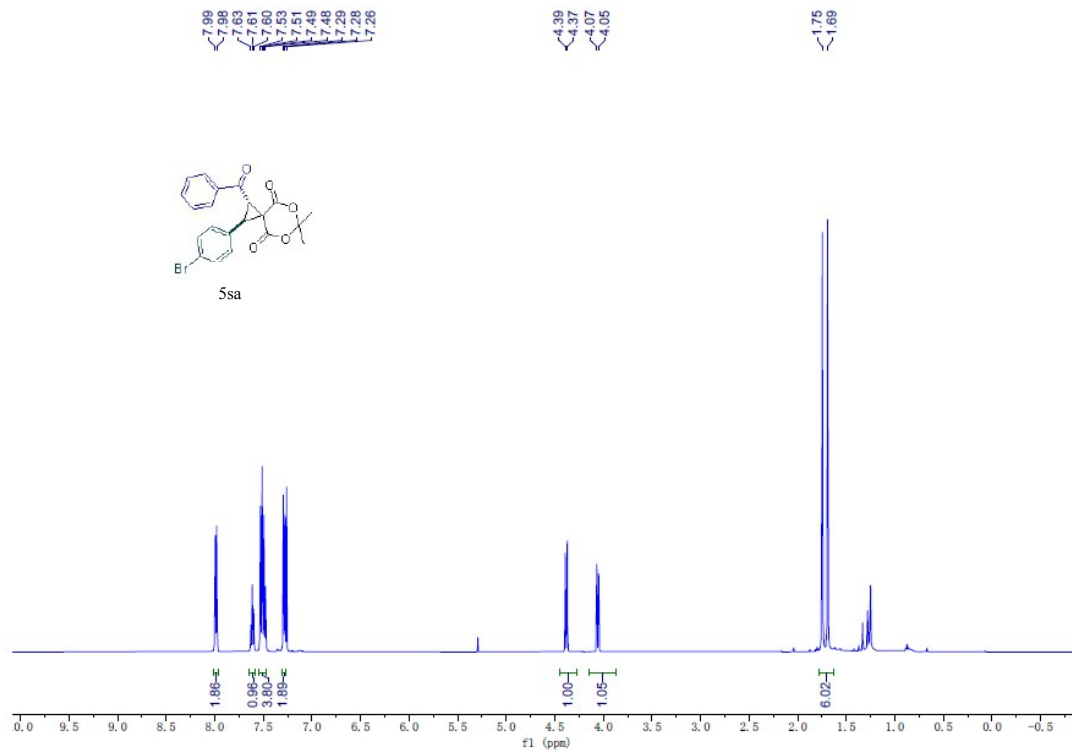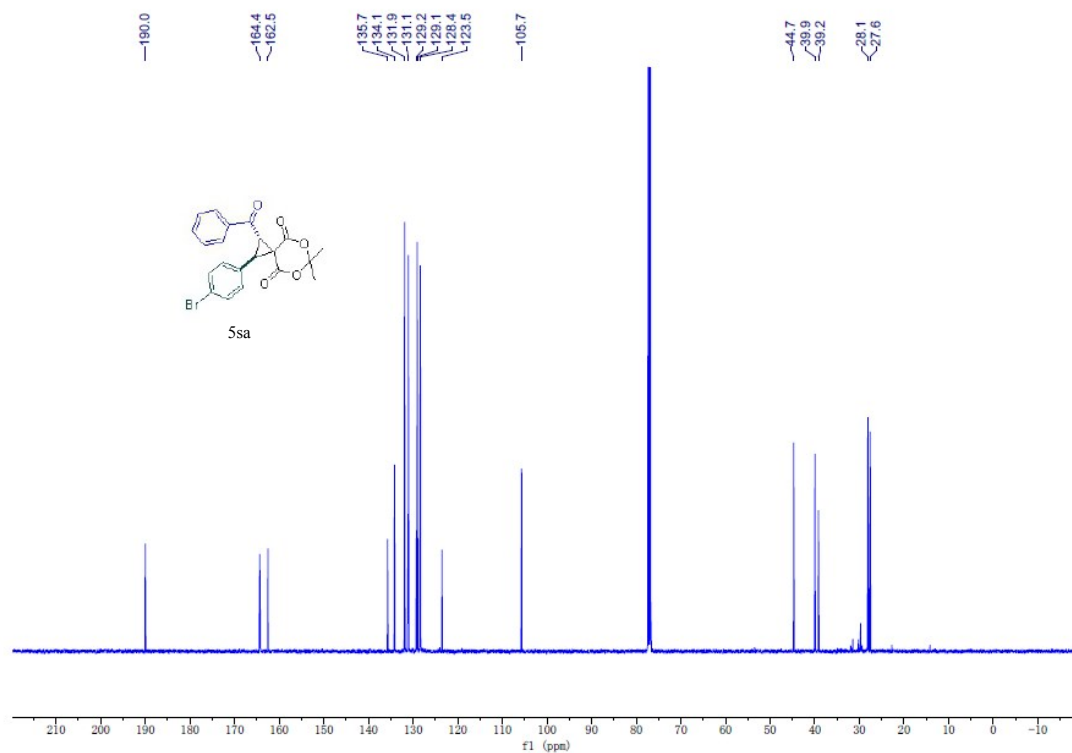

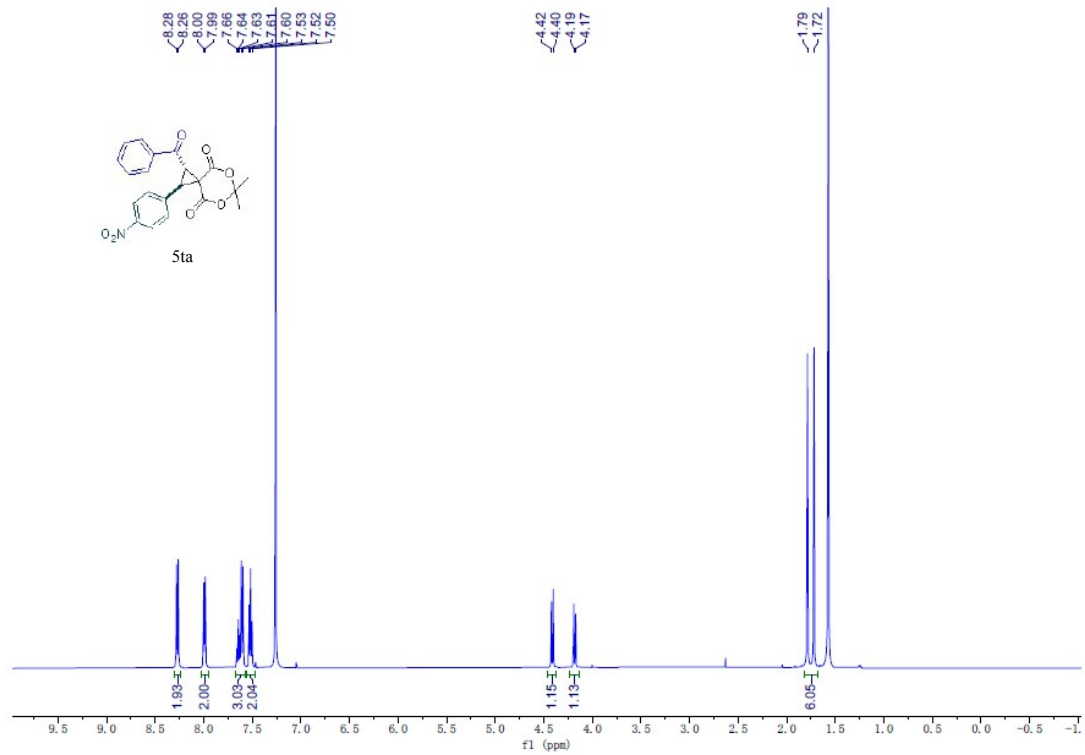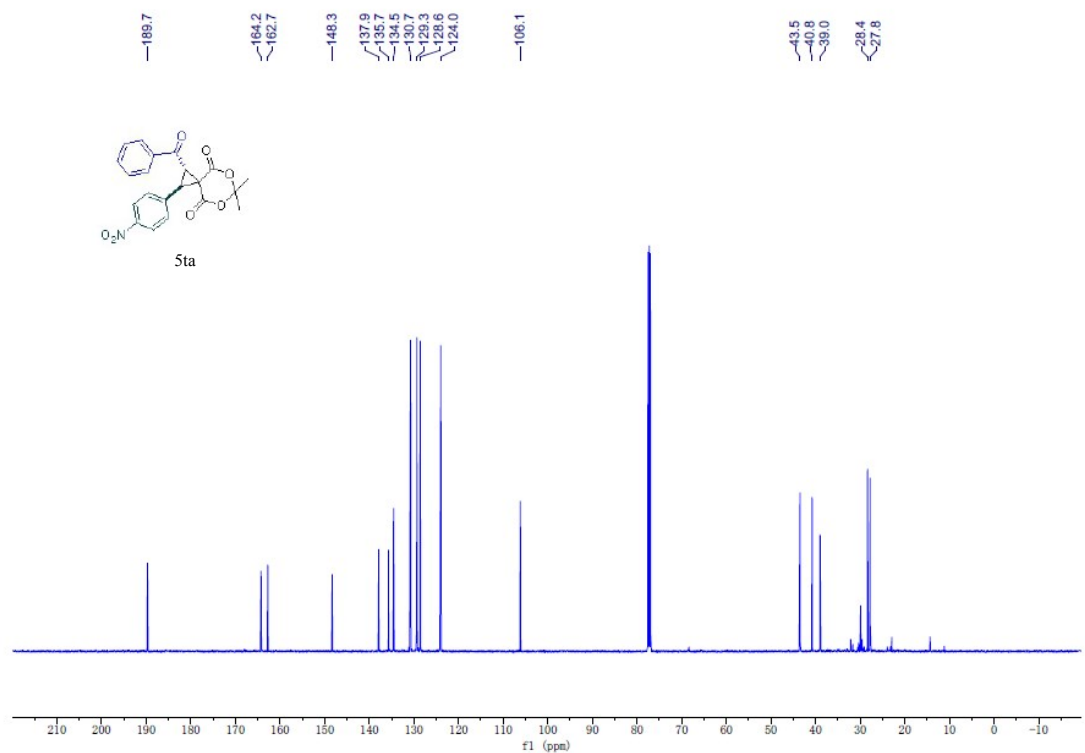

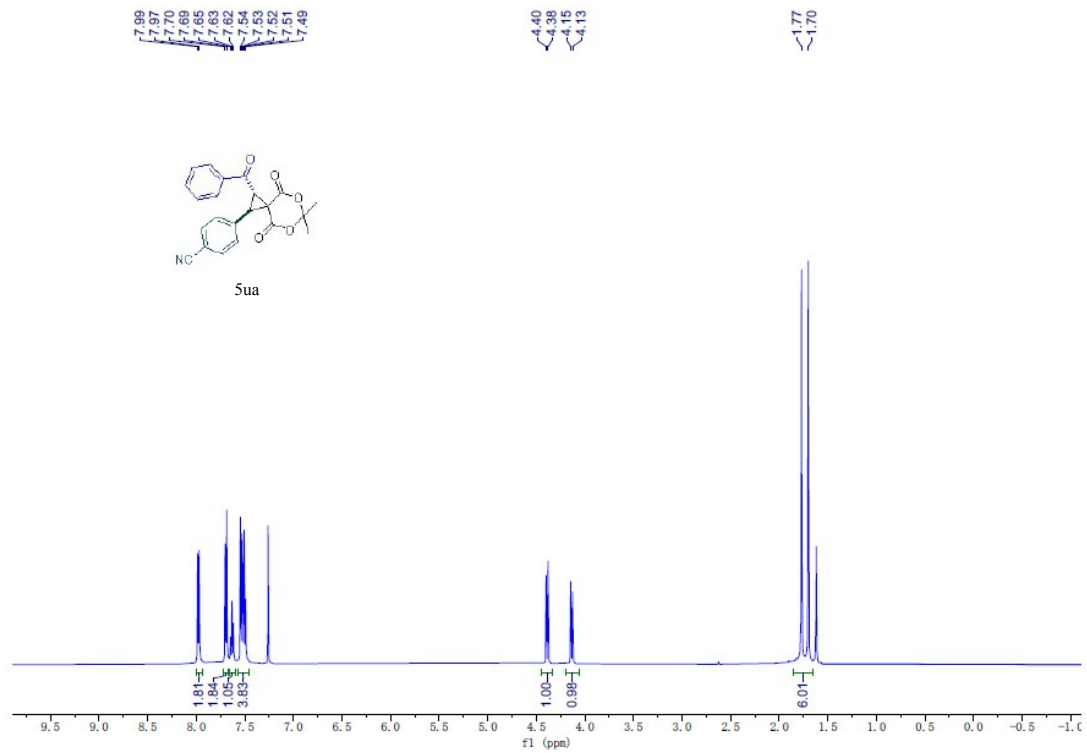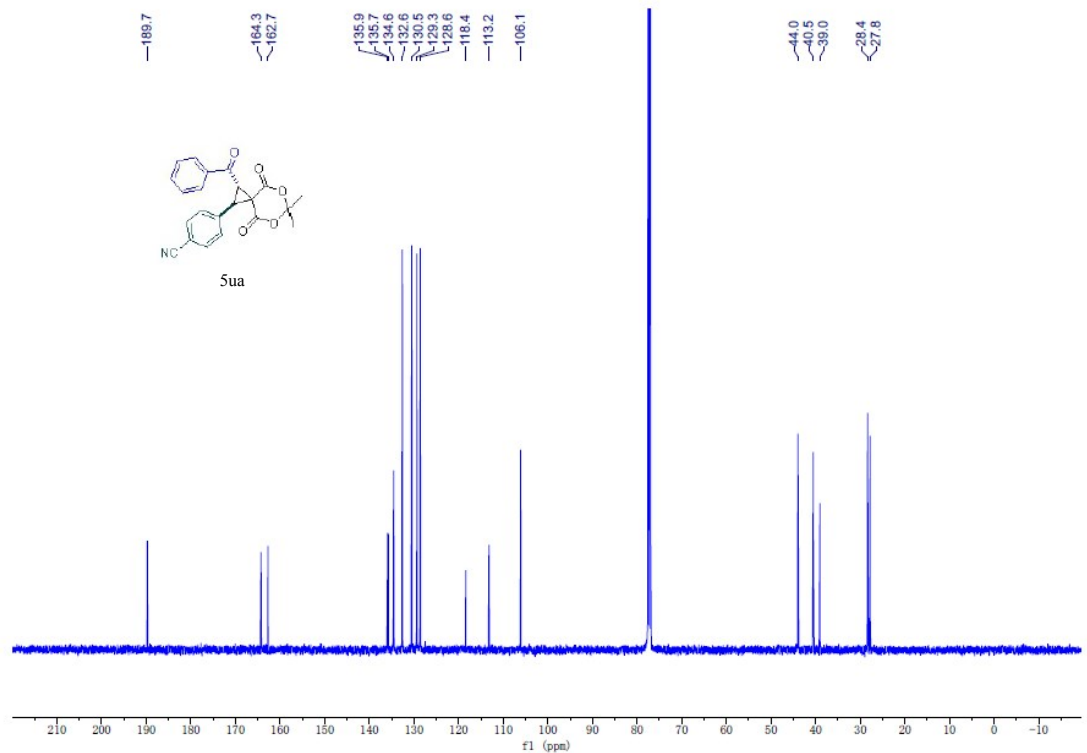

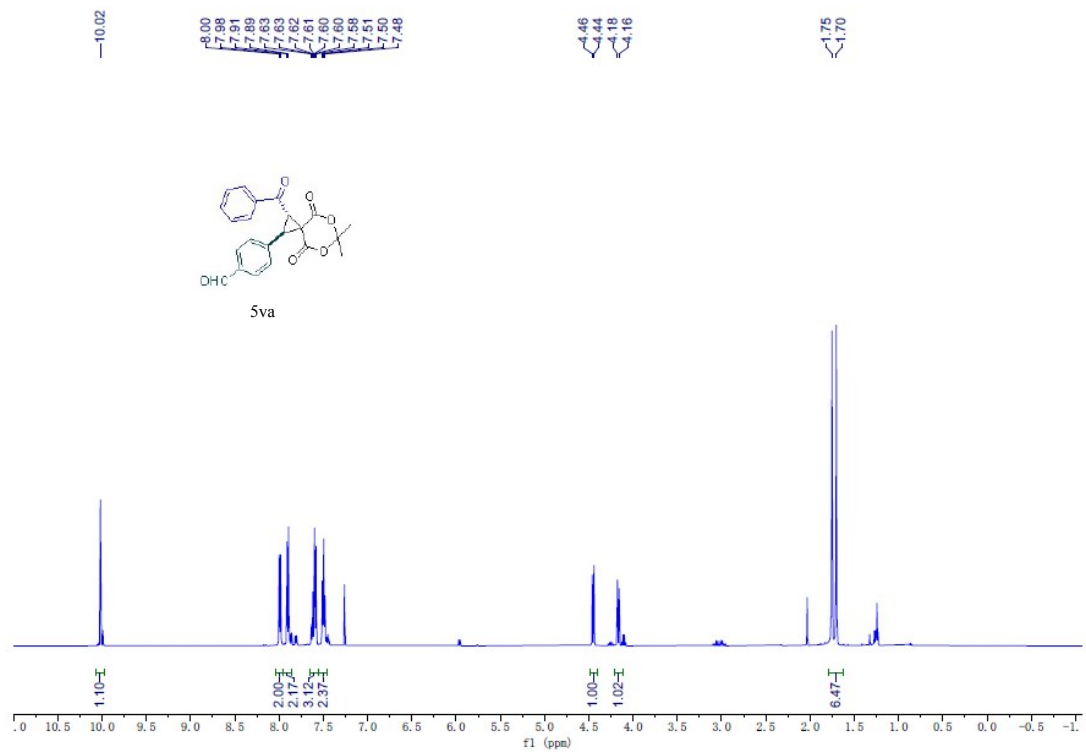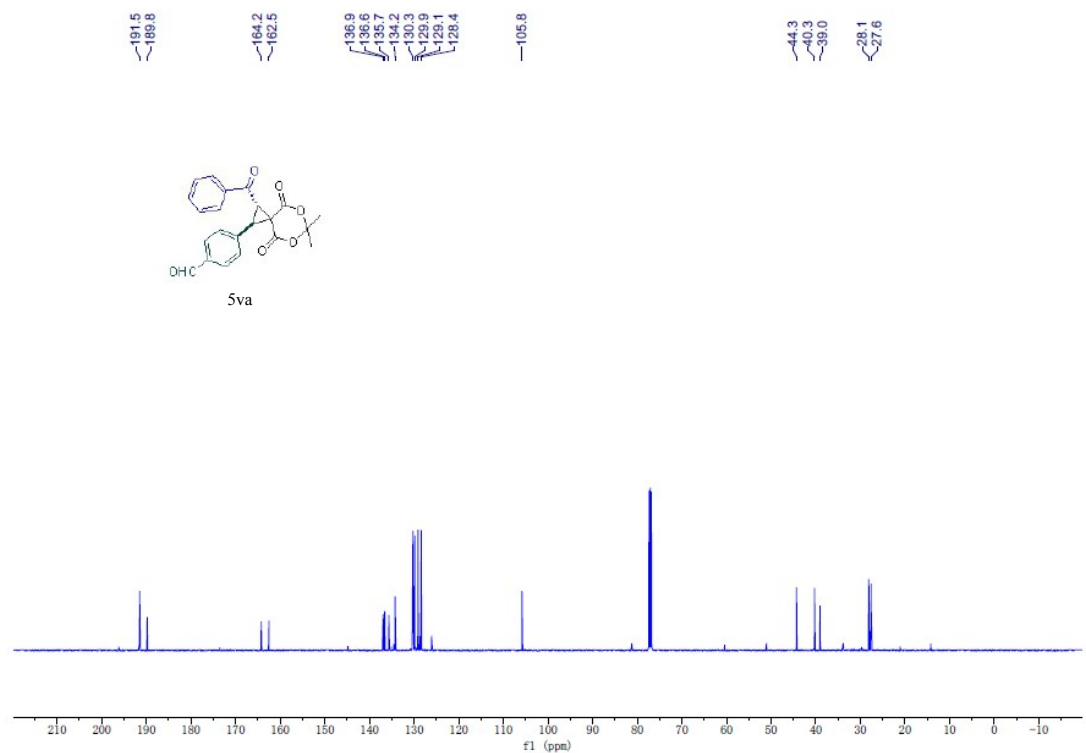

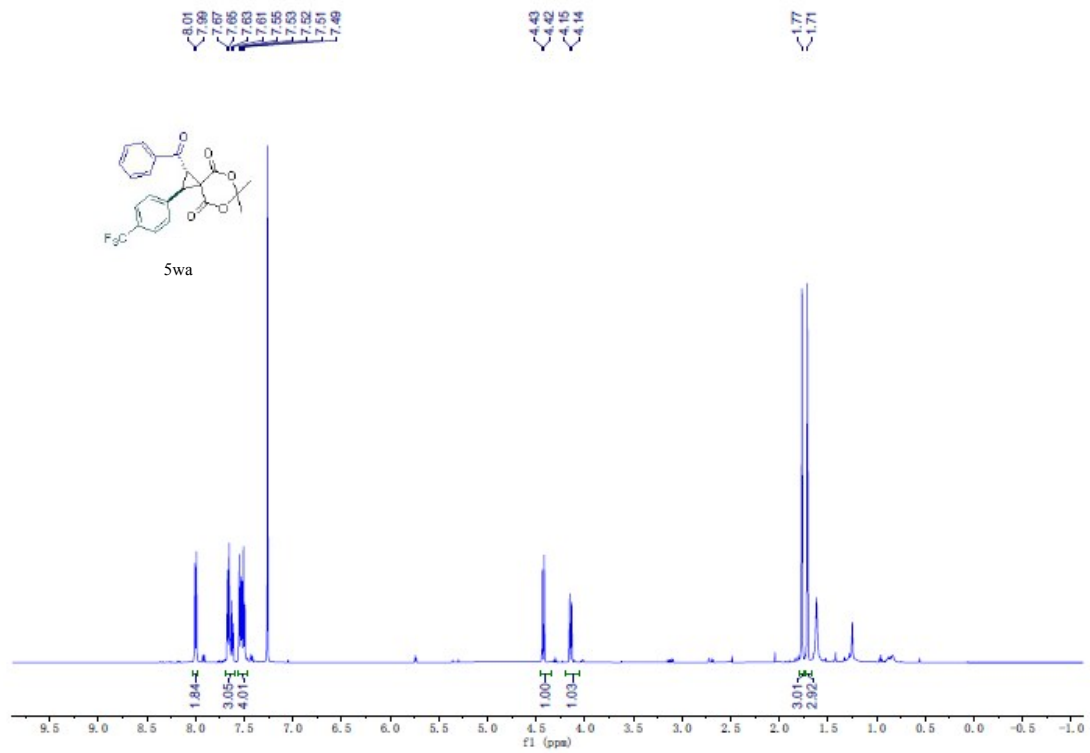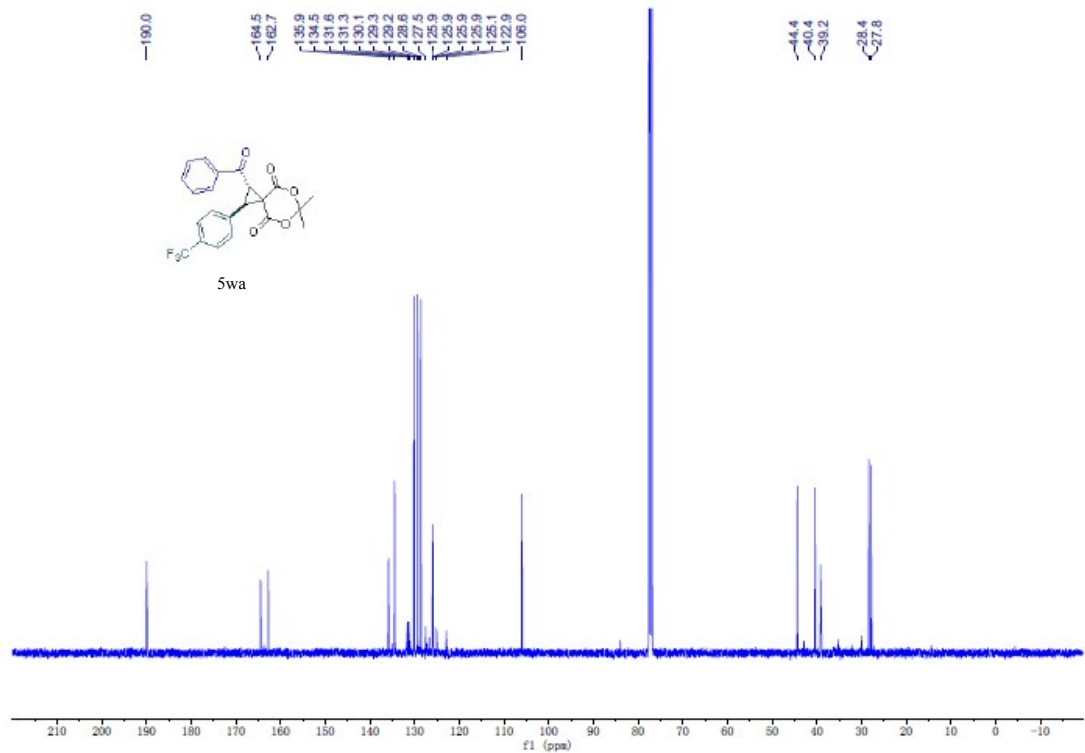

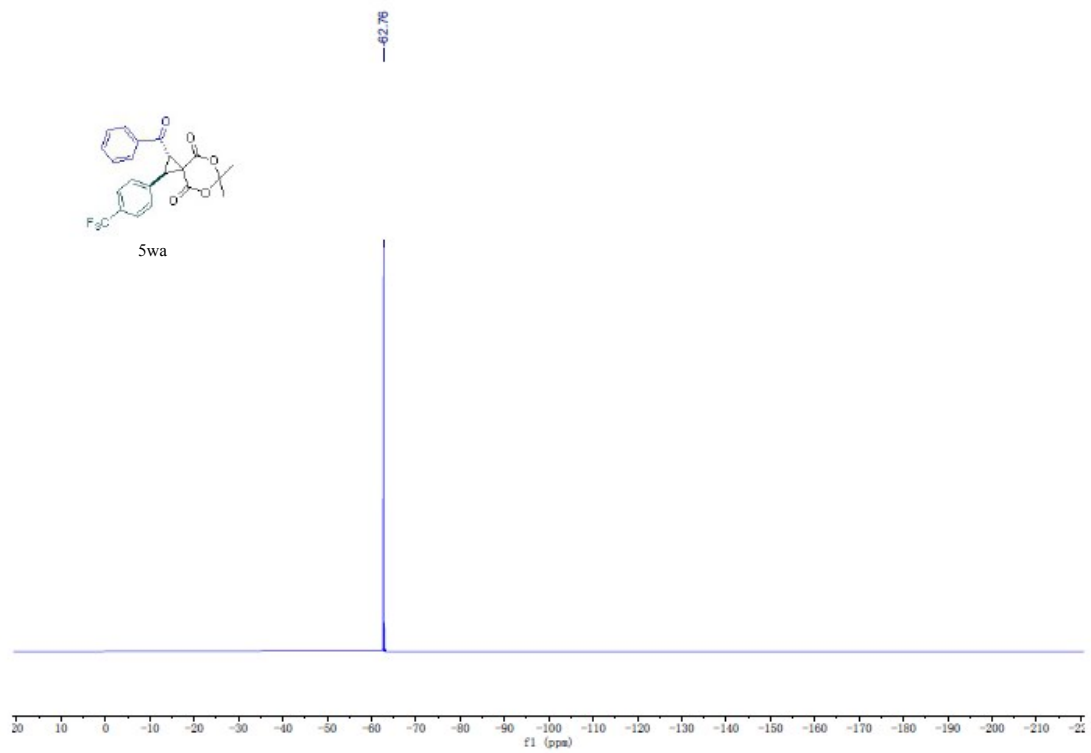

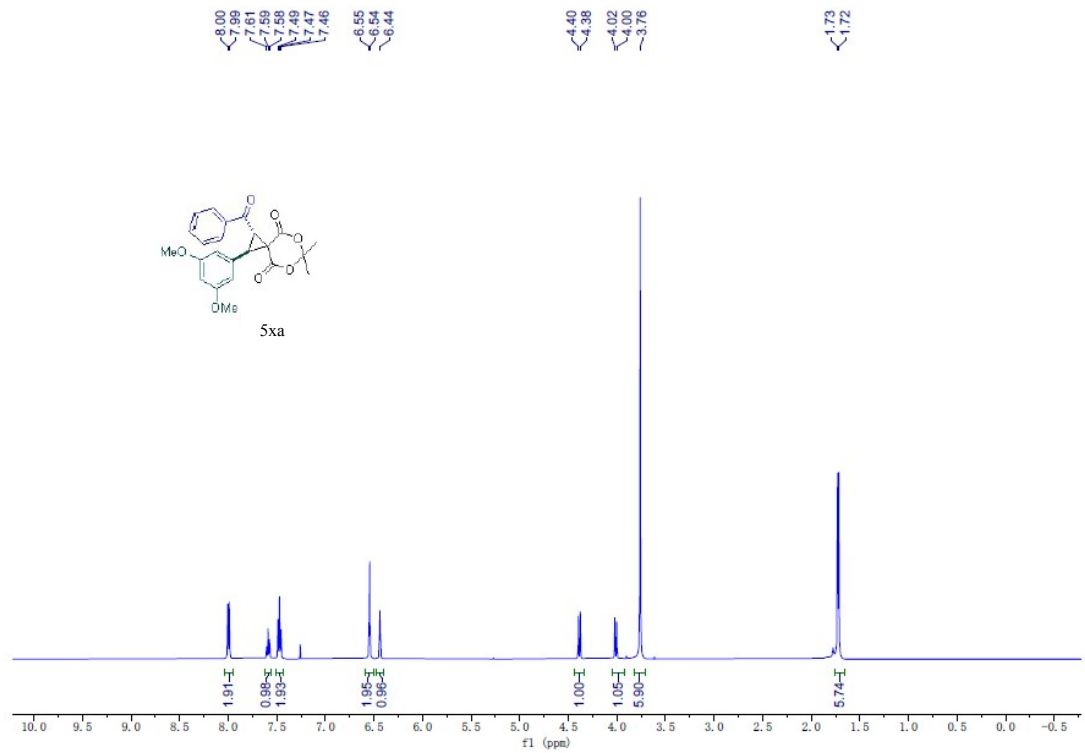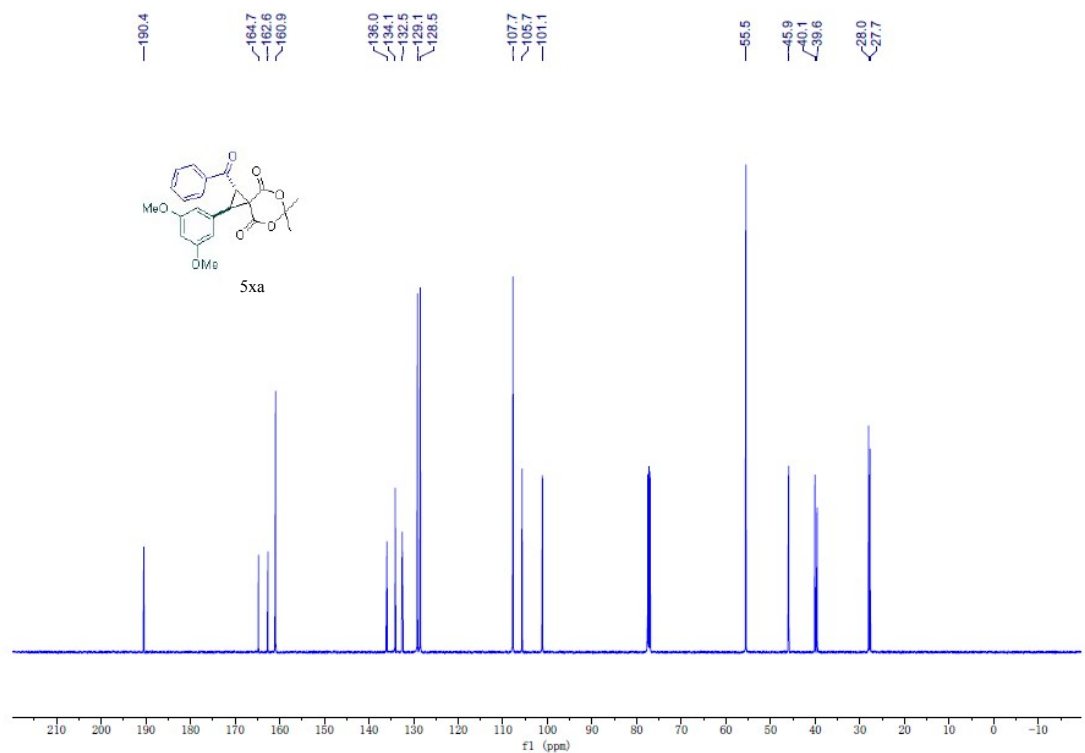

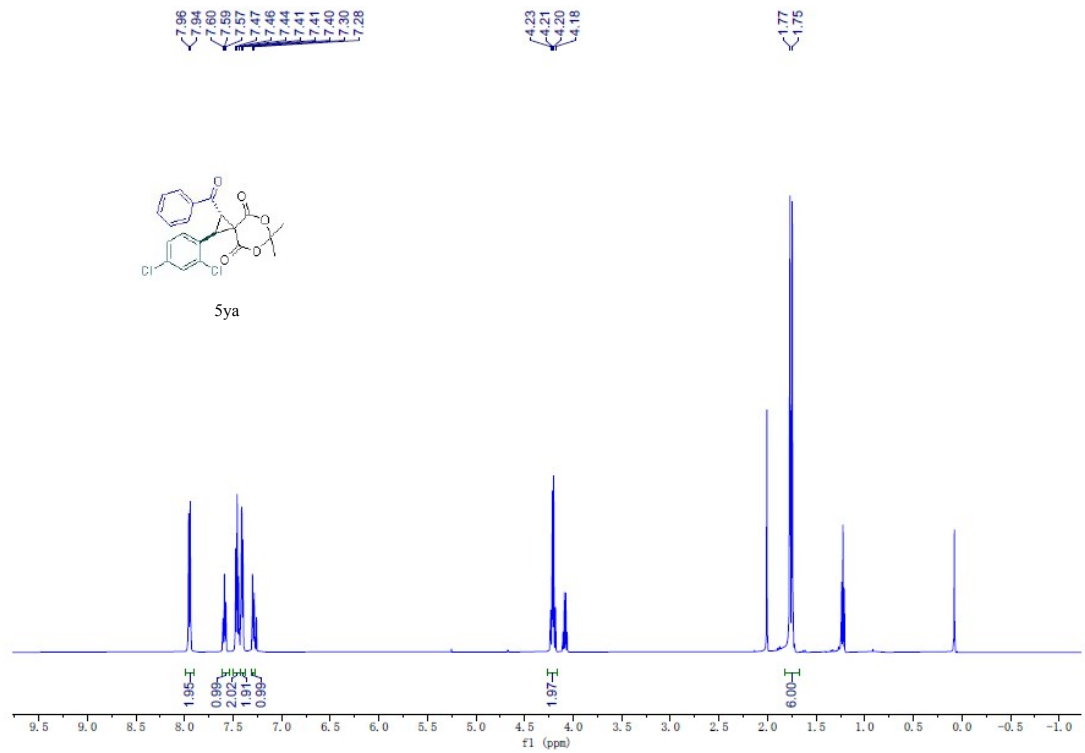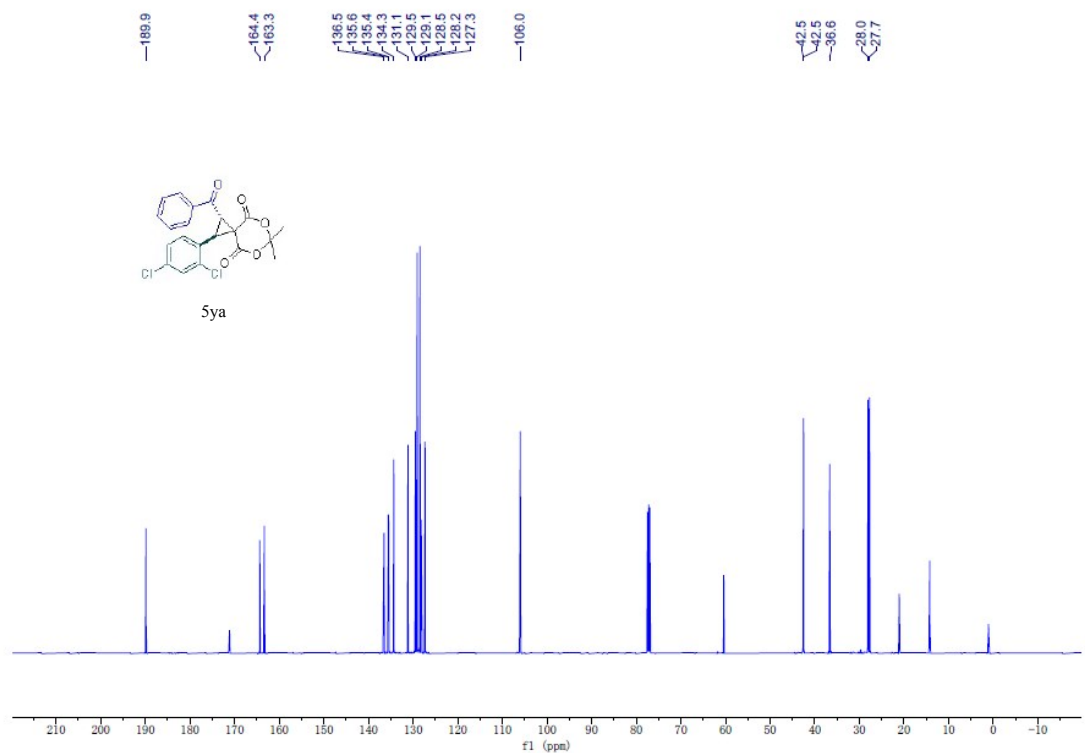



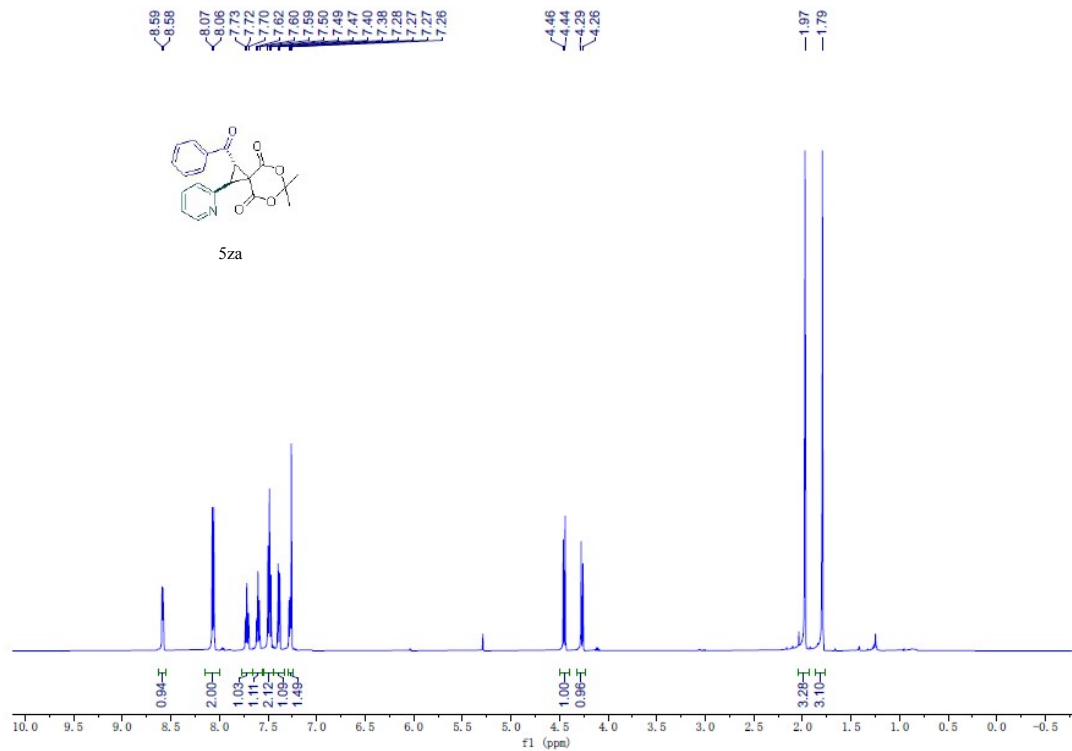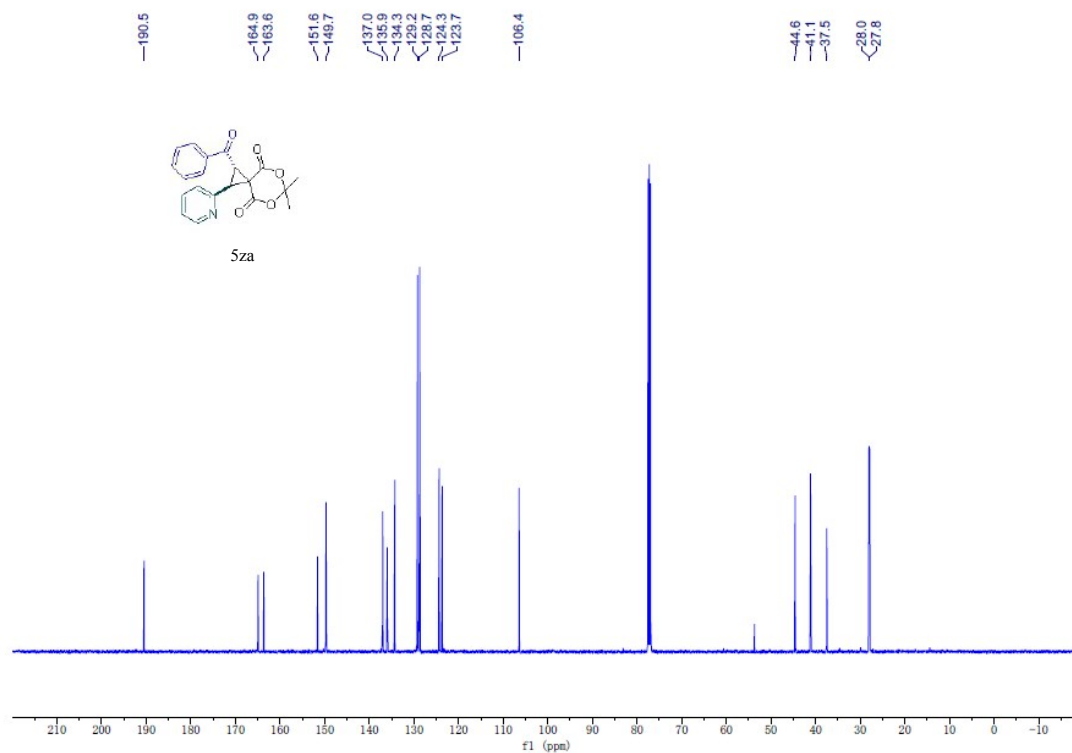

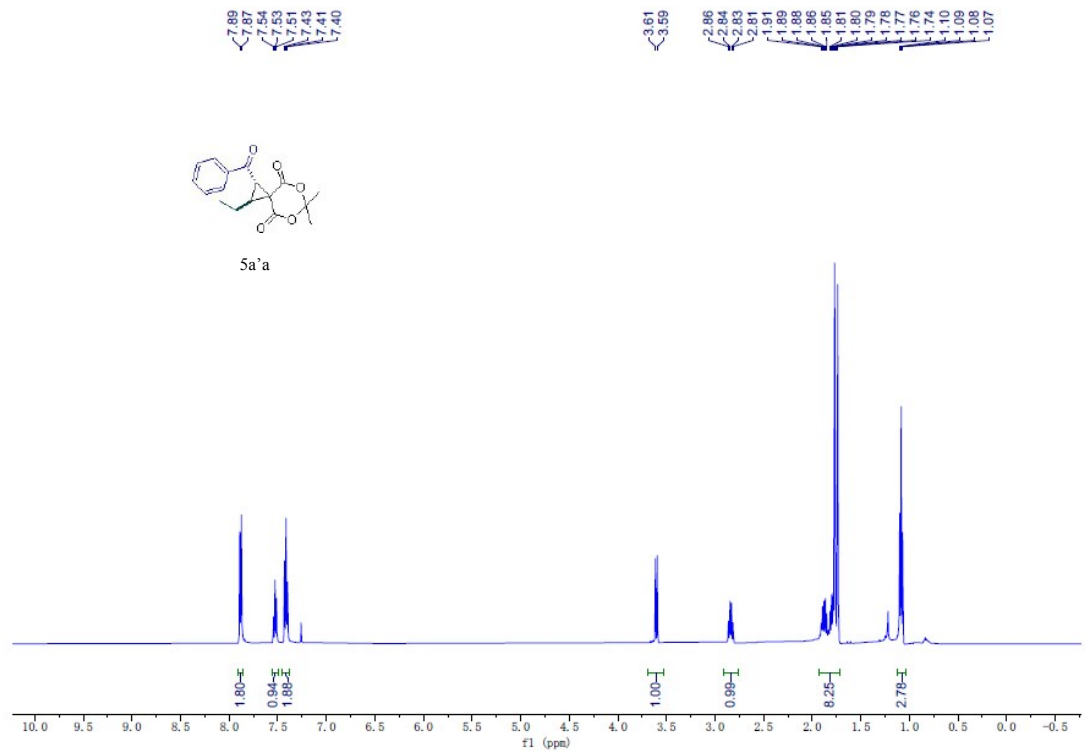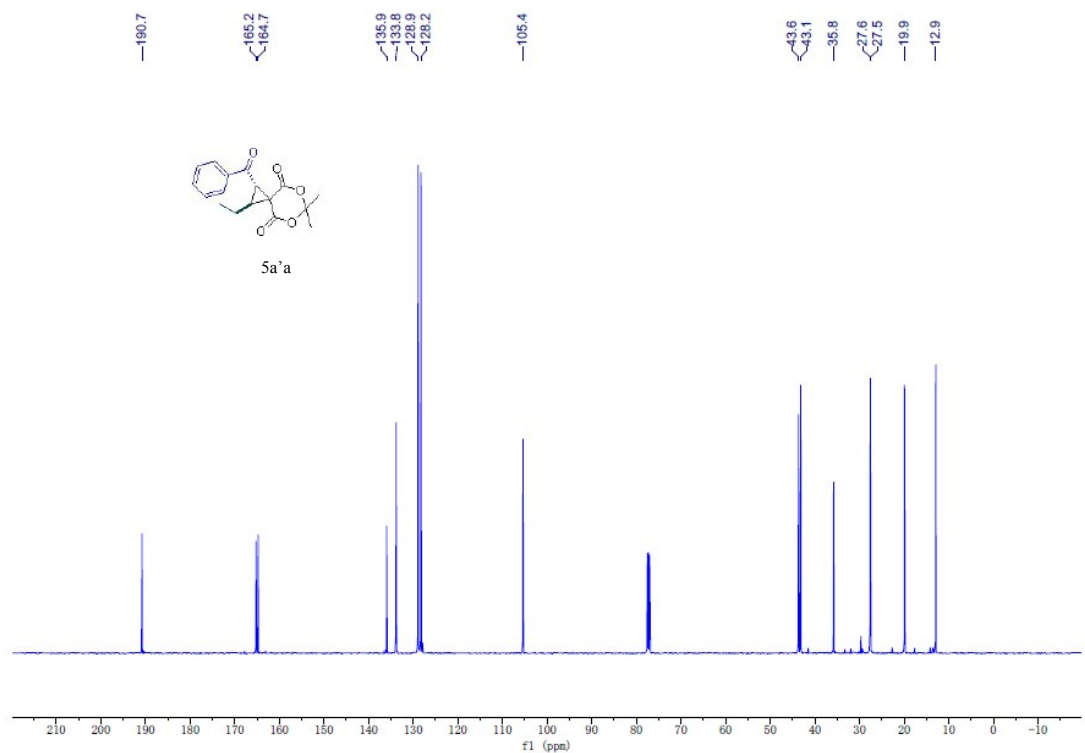

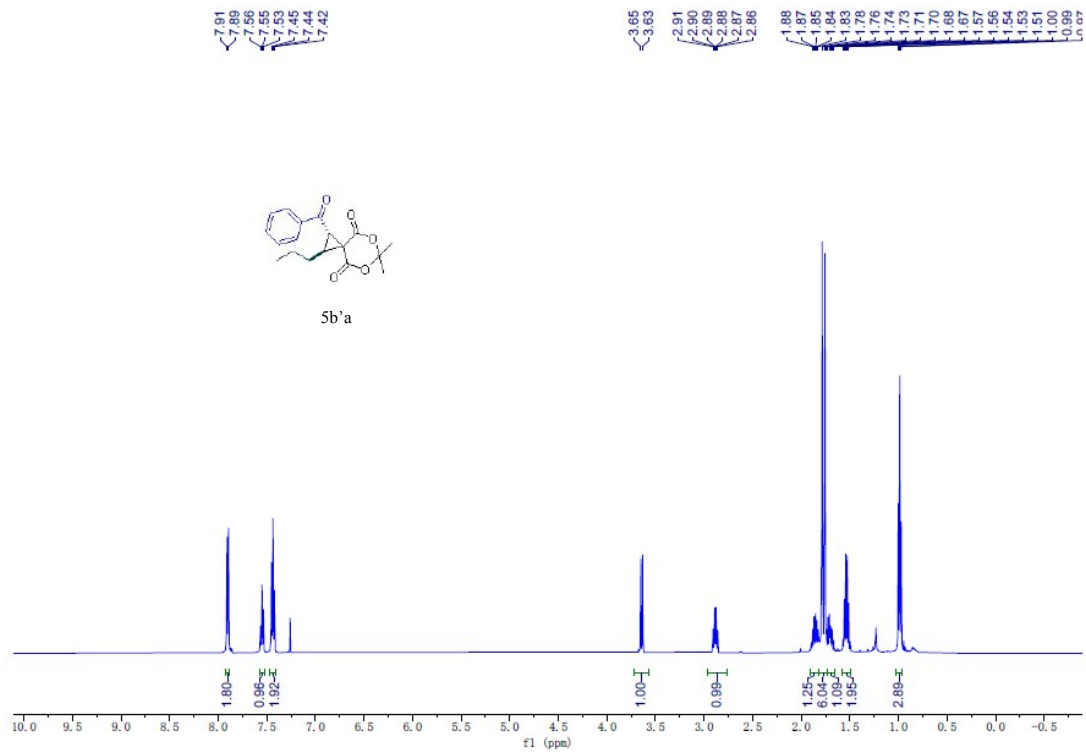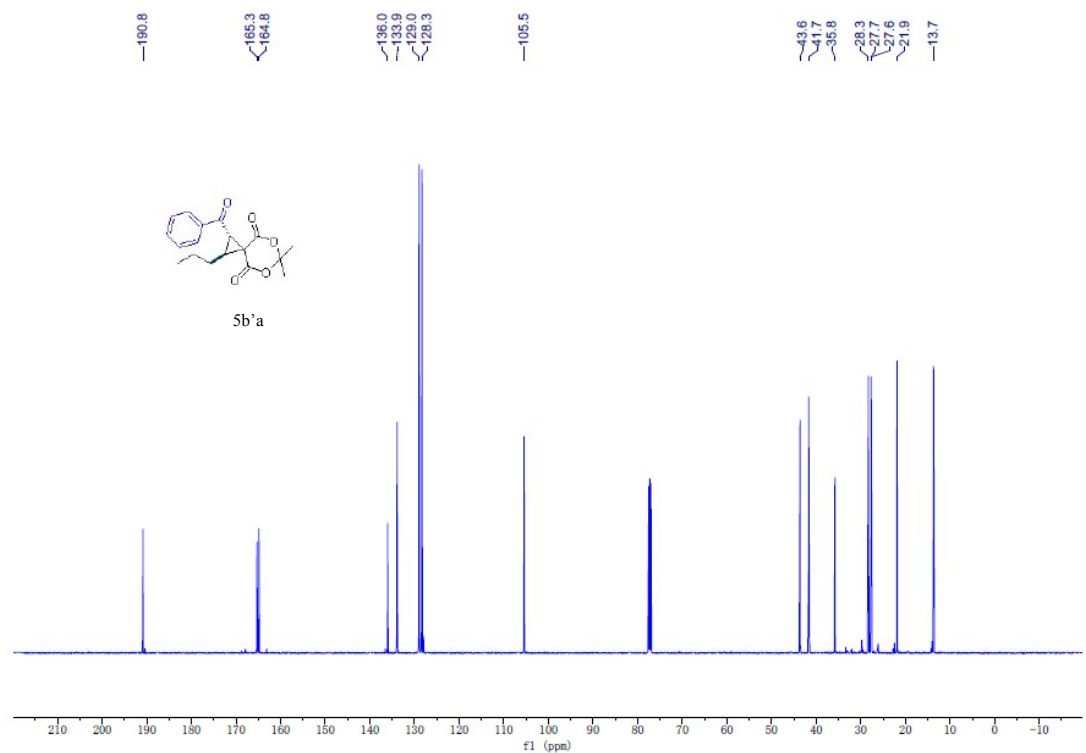

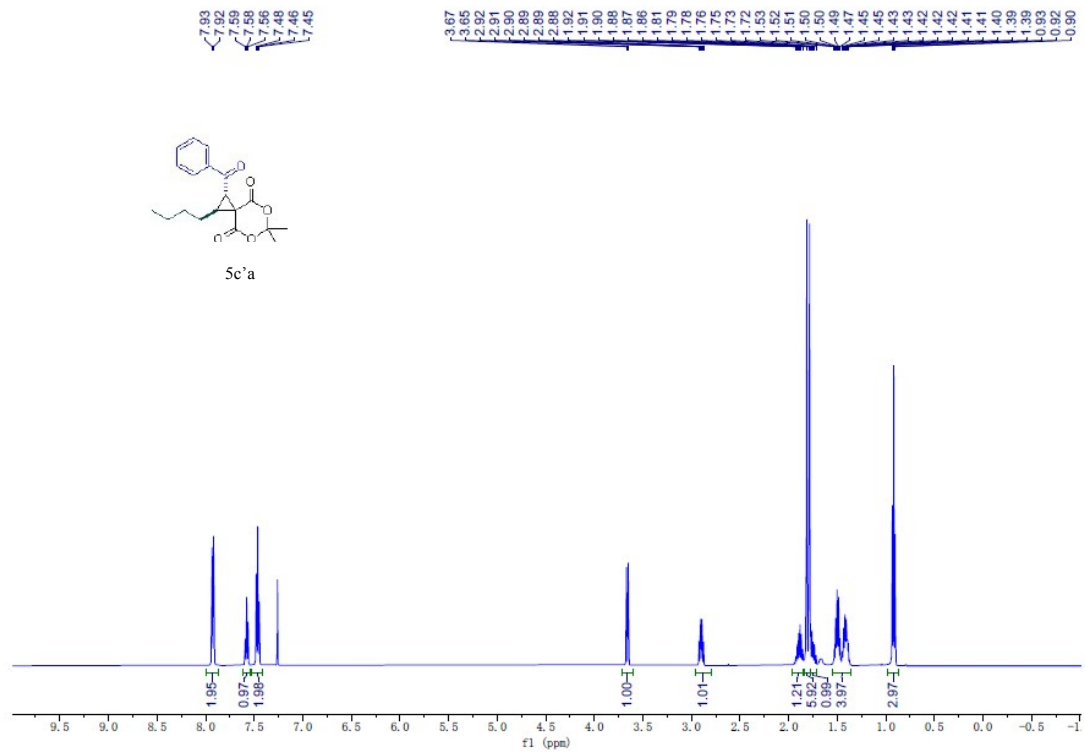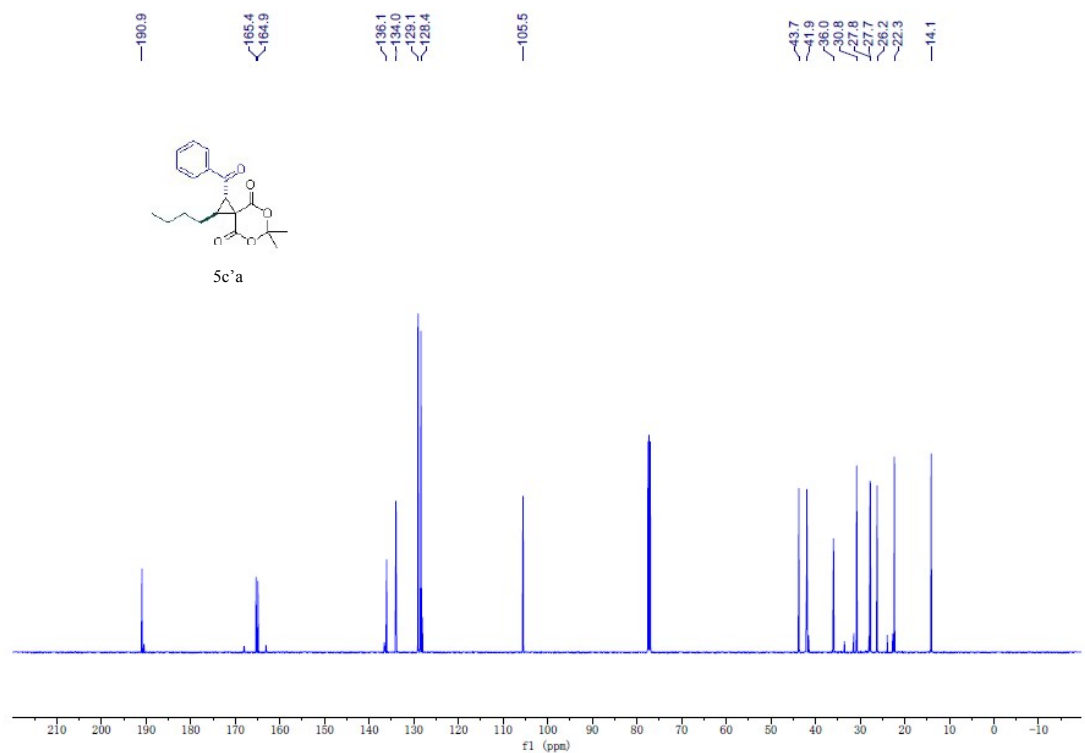

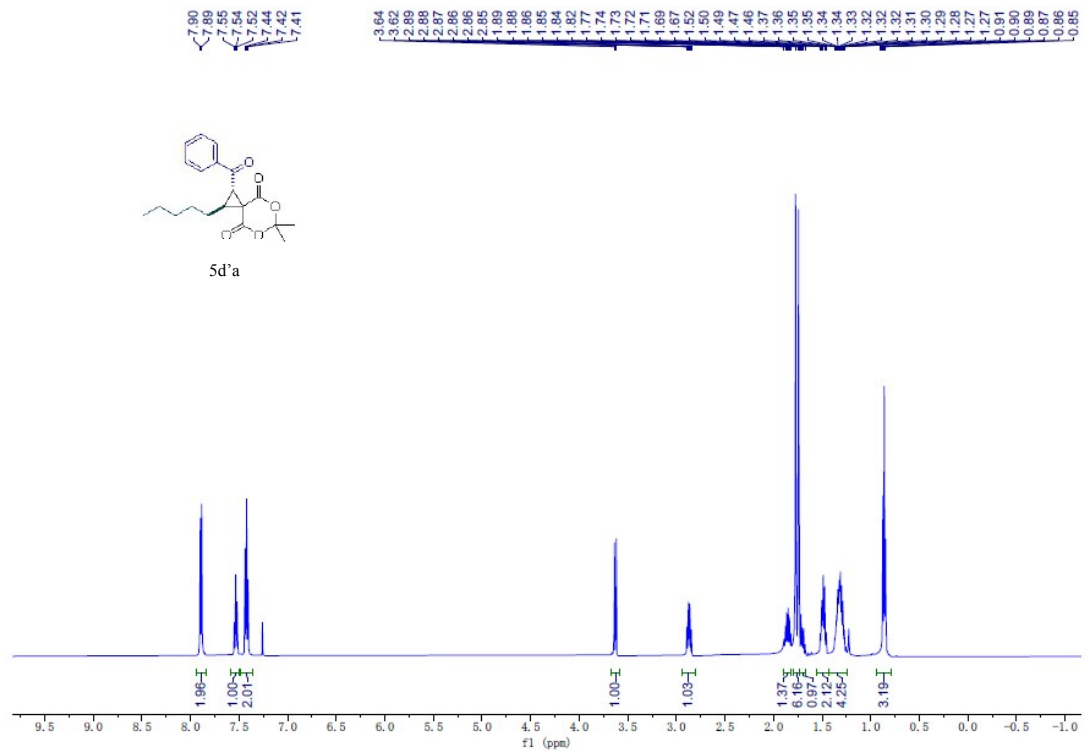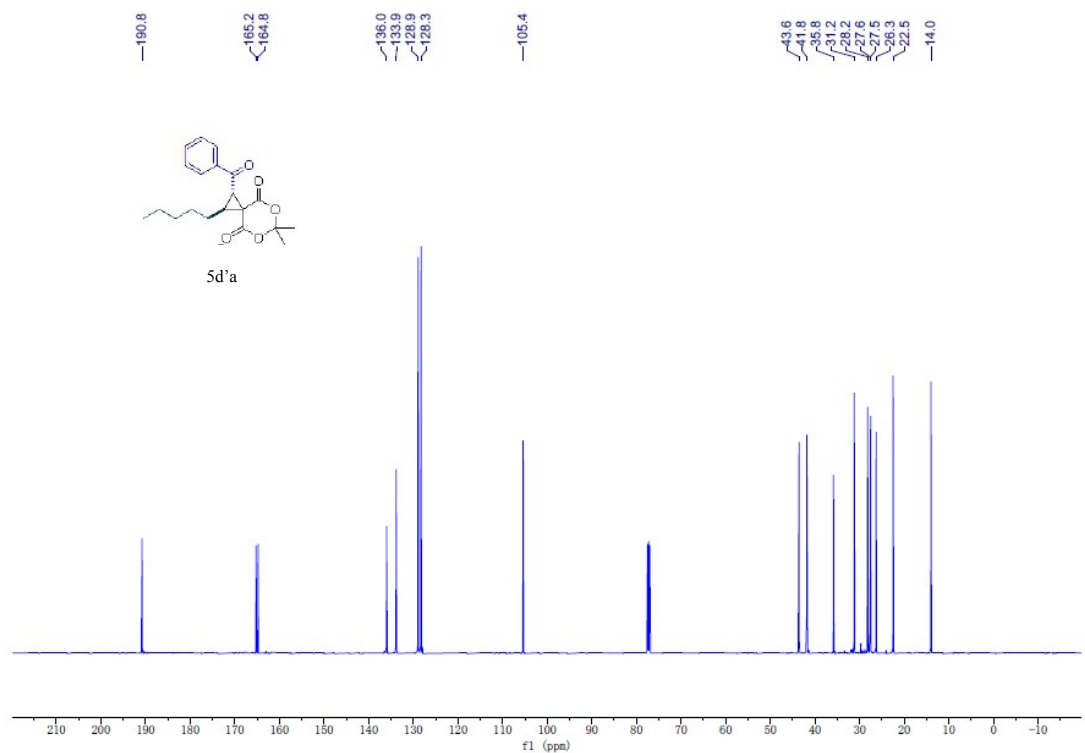

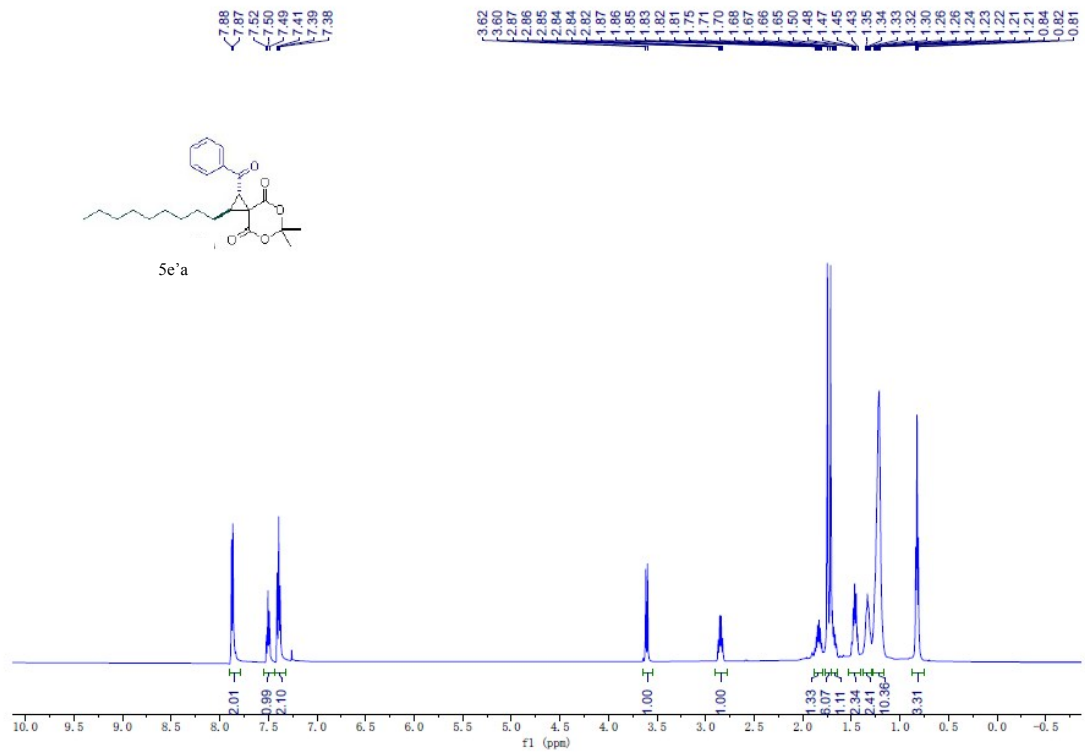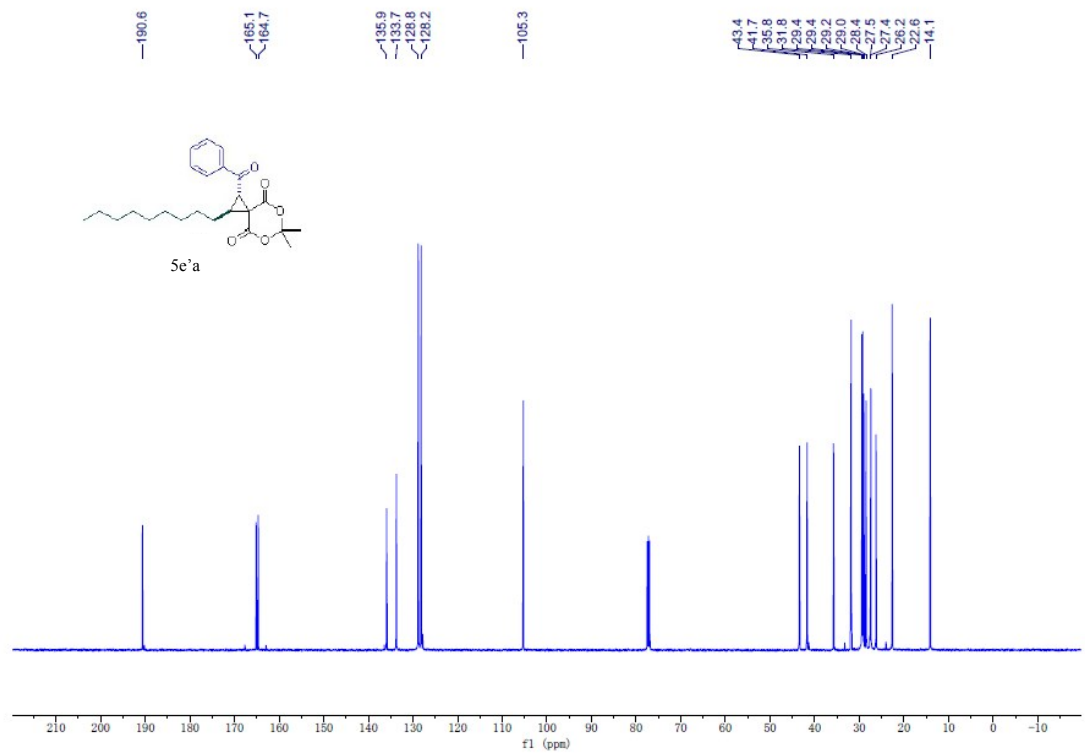

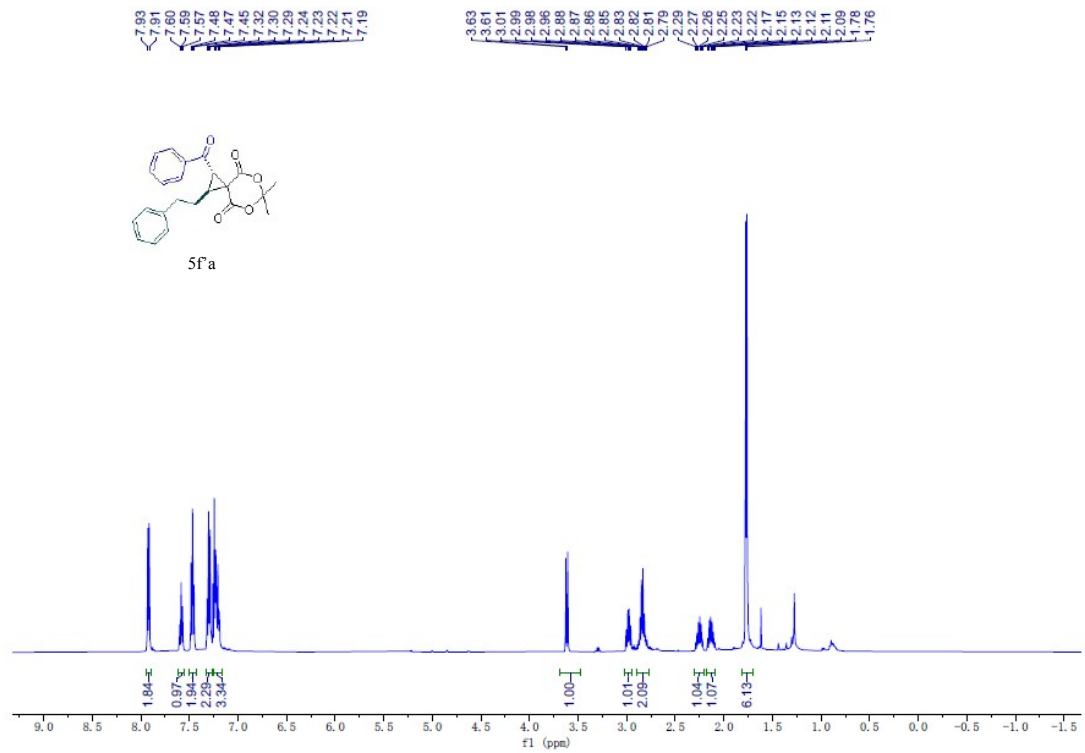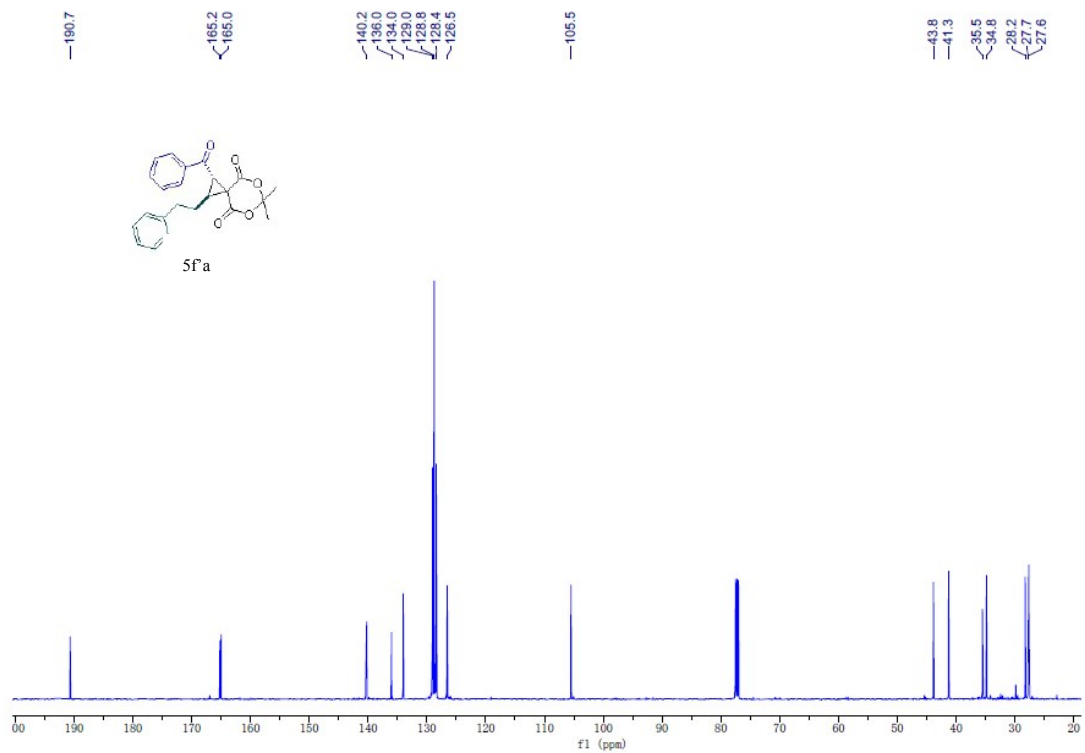

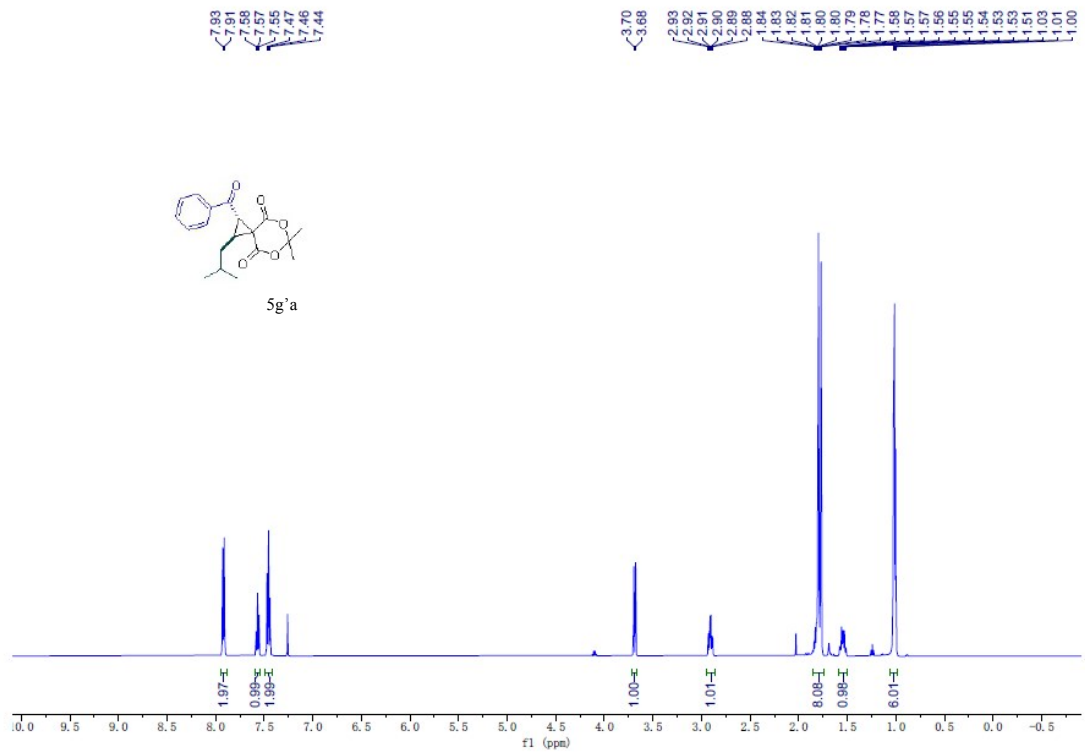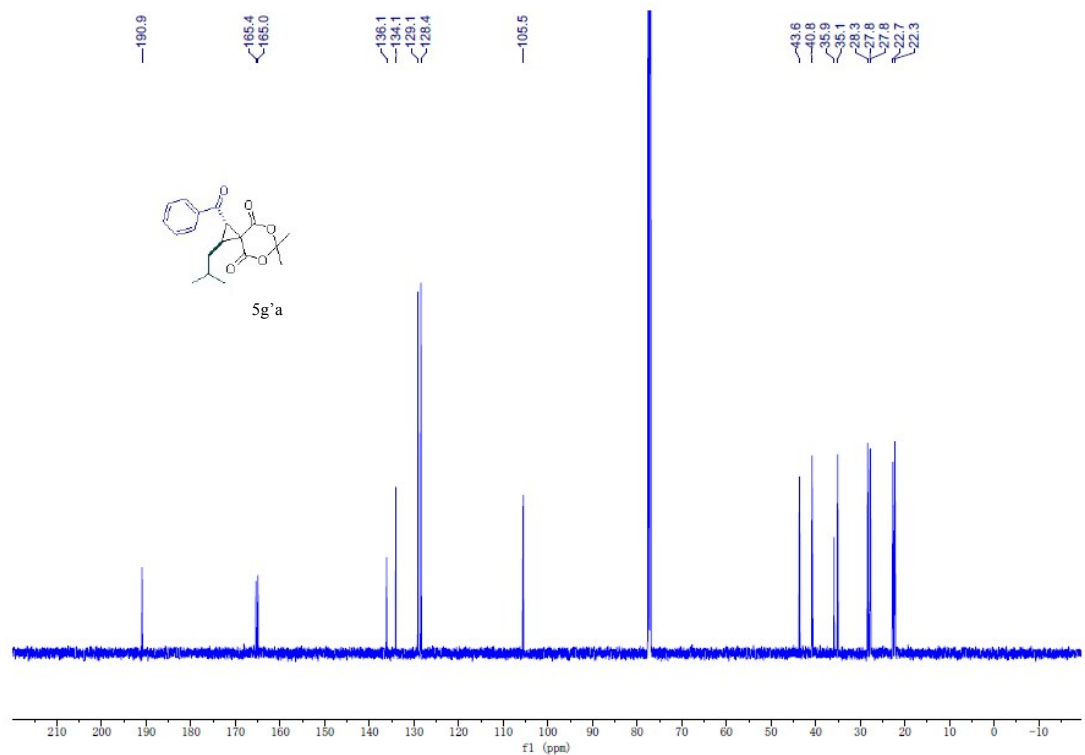



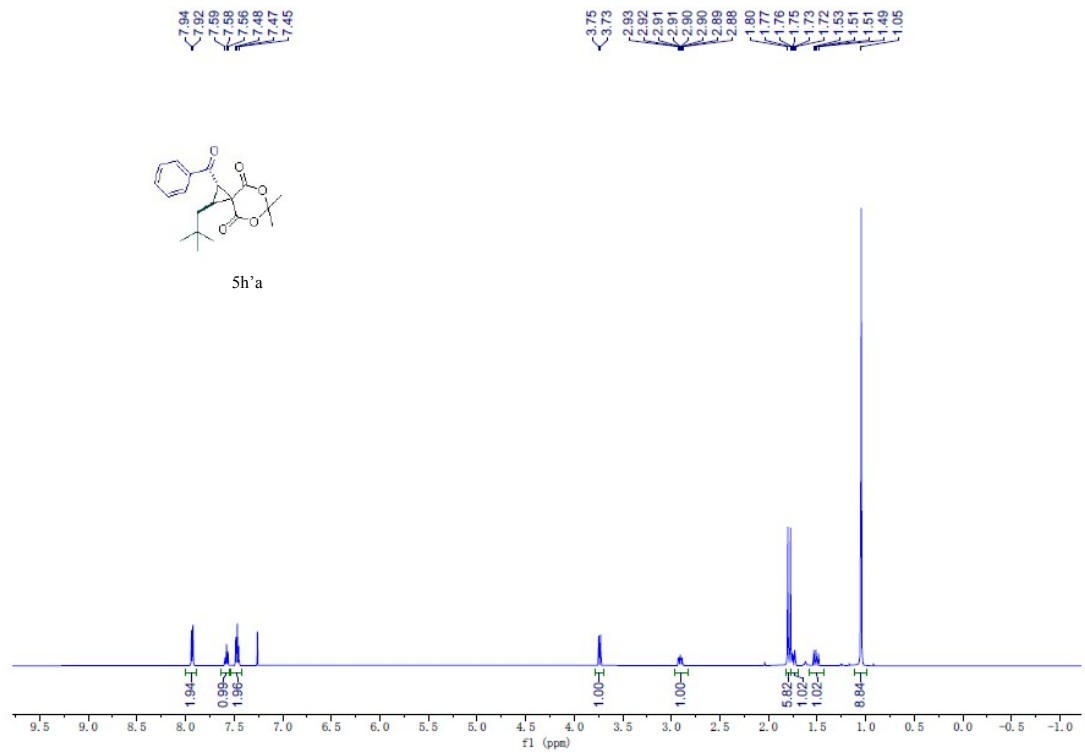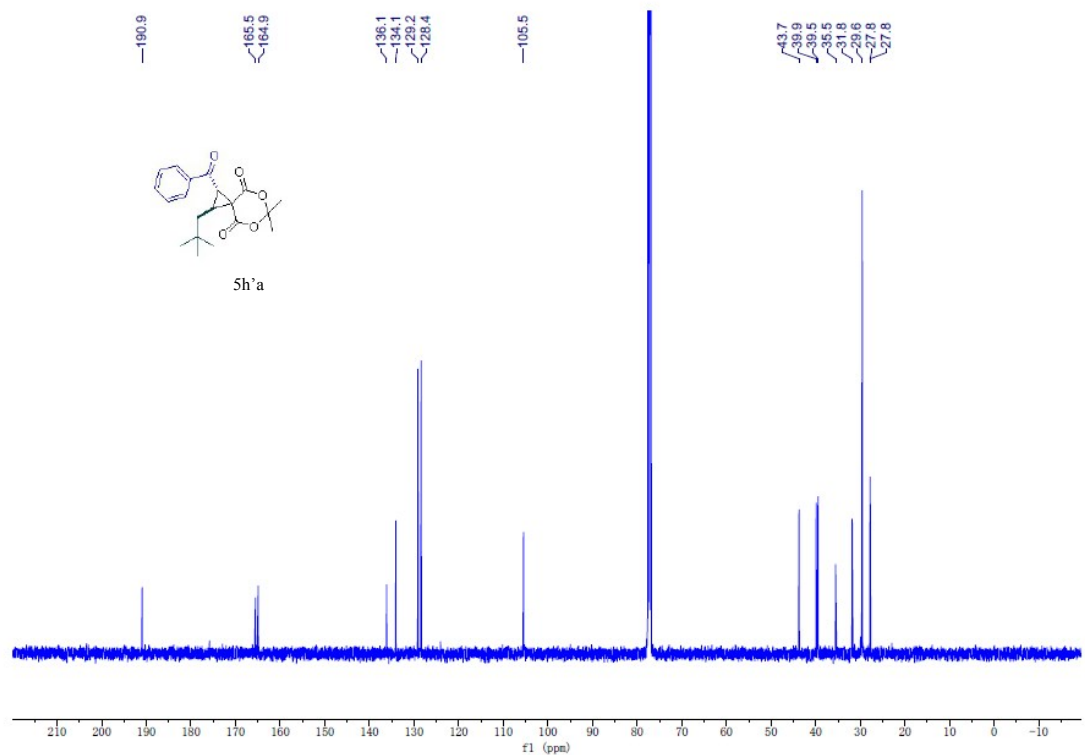

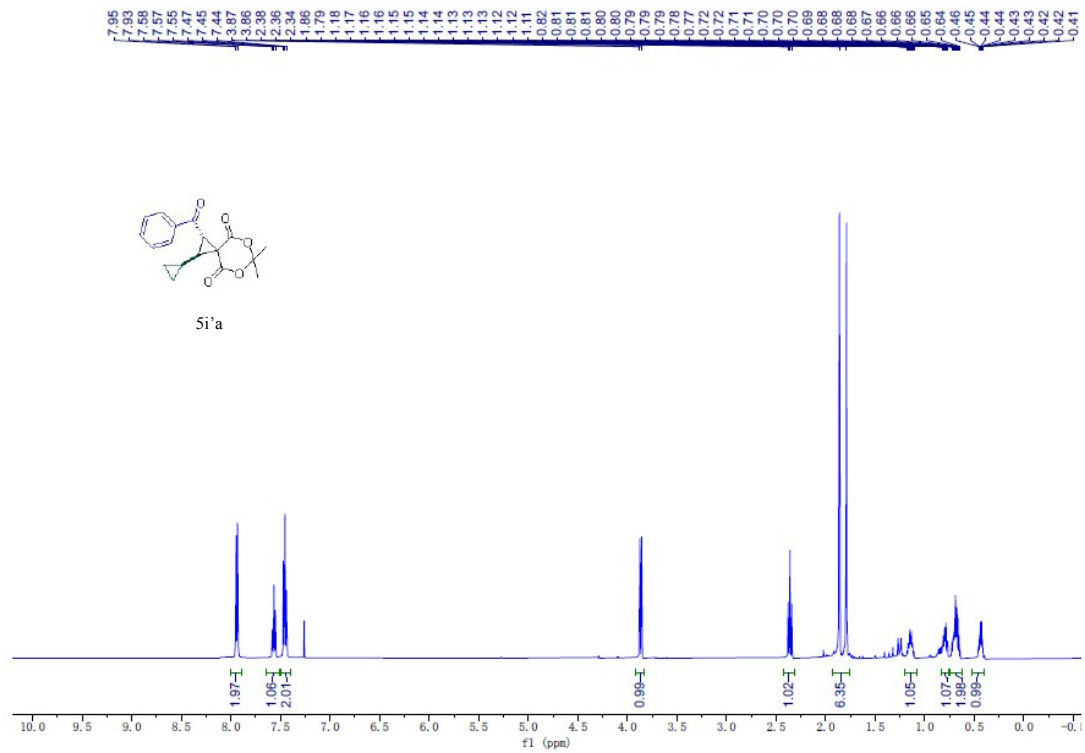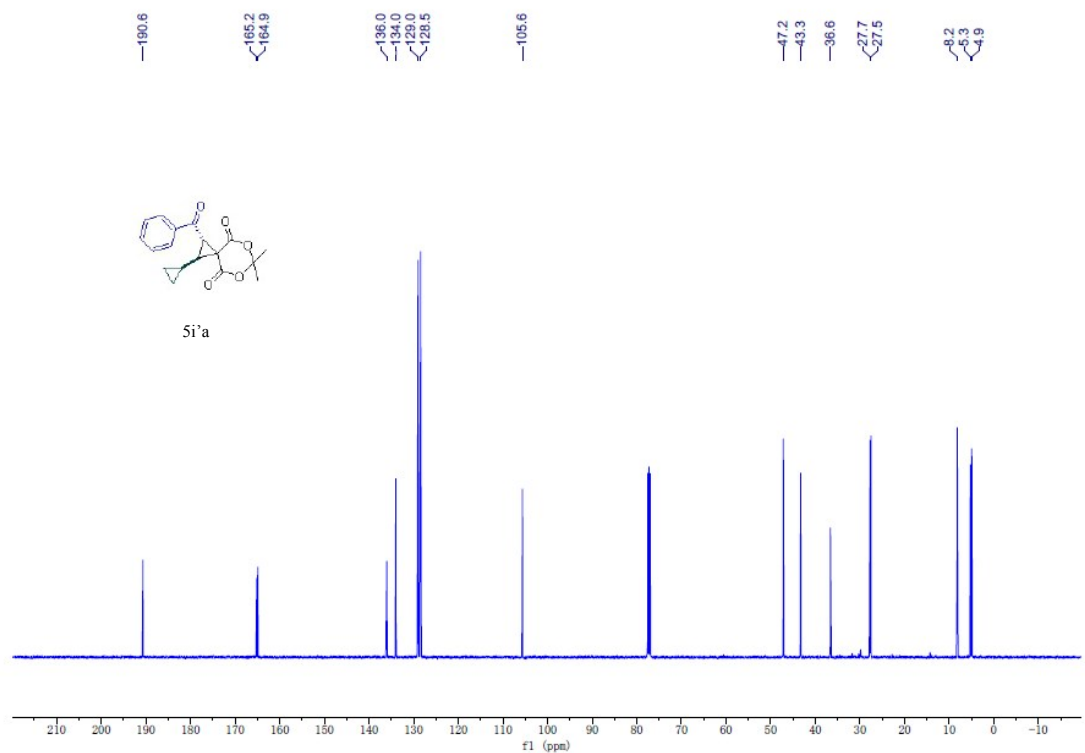

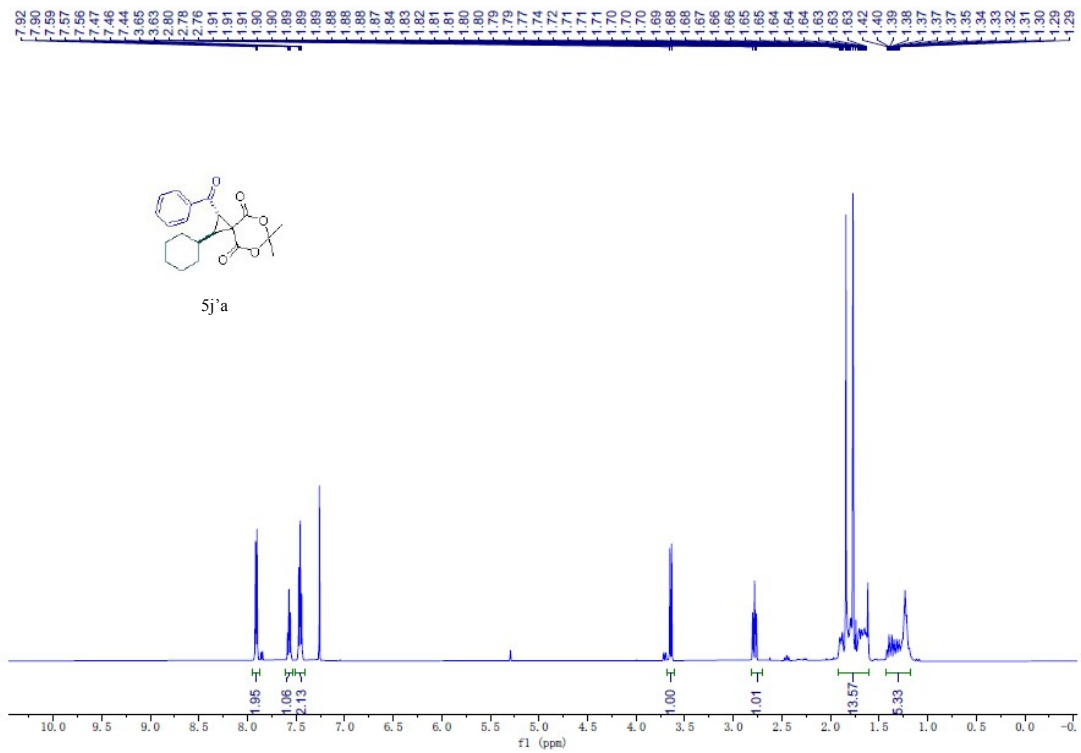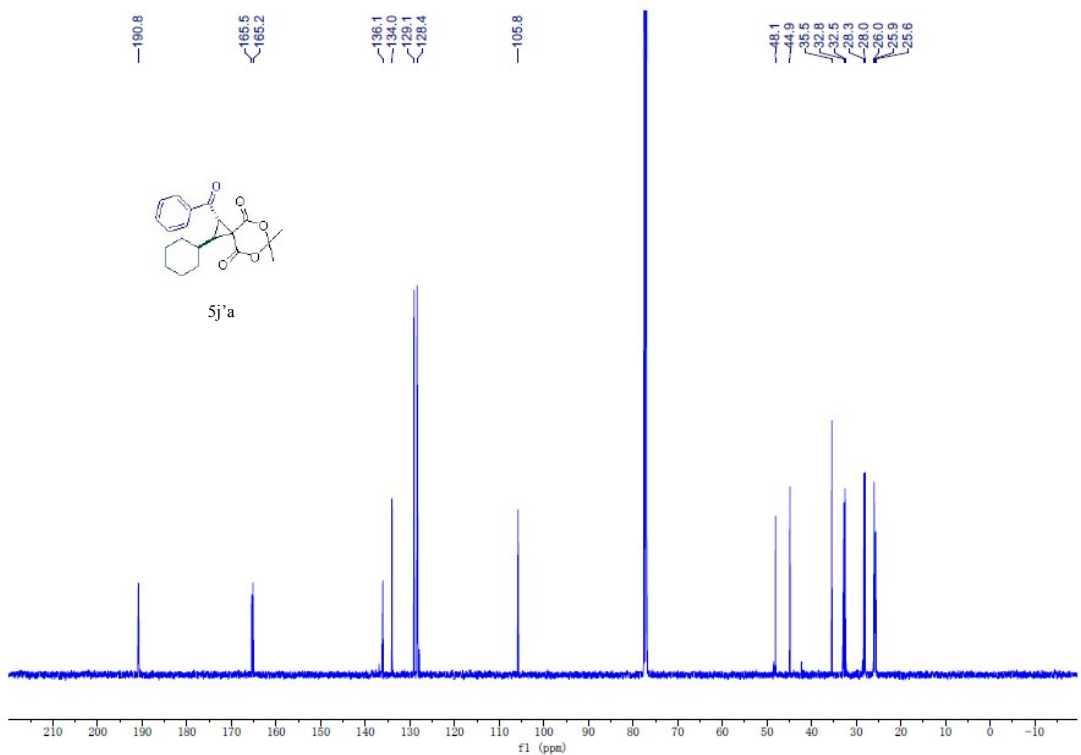

## 7.4. Copies of NMR Spectra for Compounds of 5c'b--5c'x

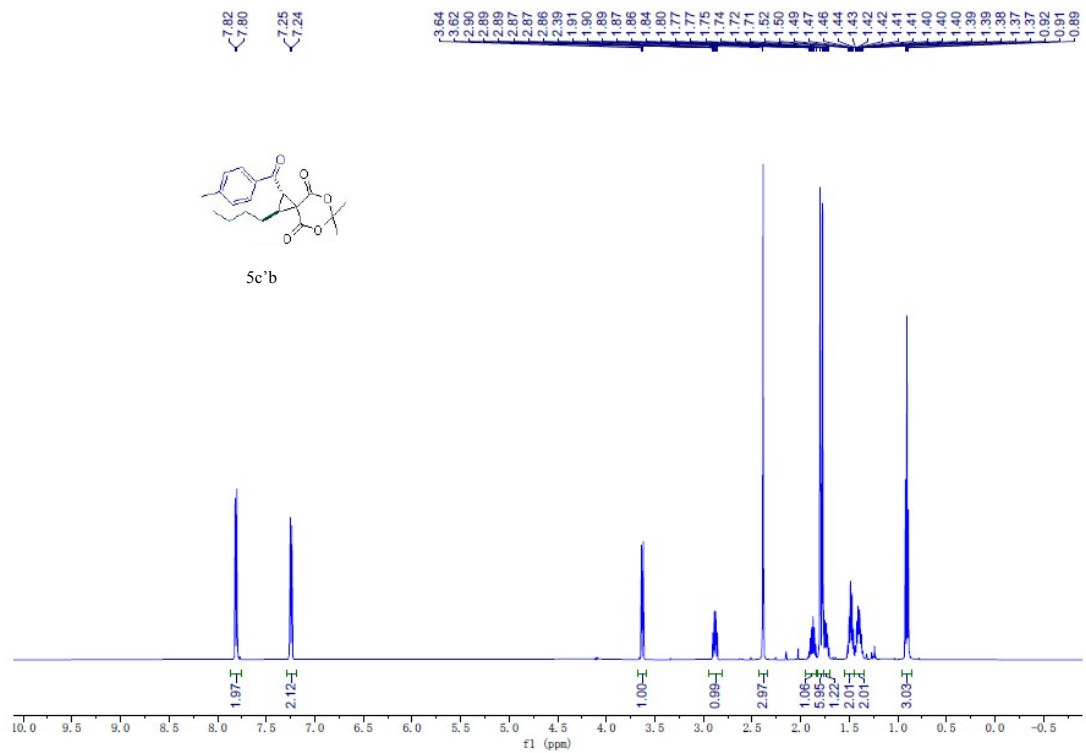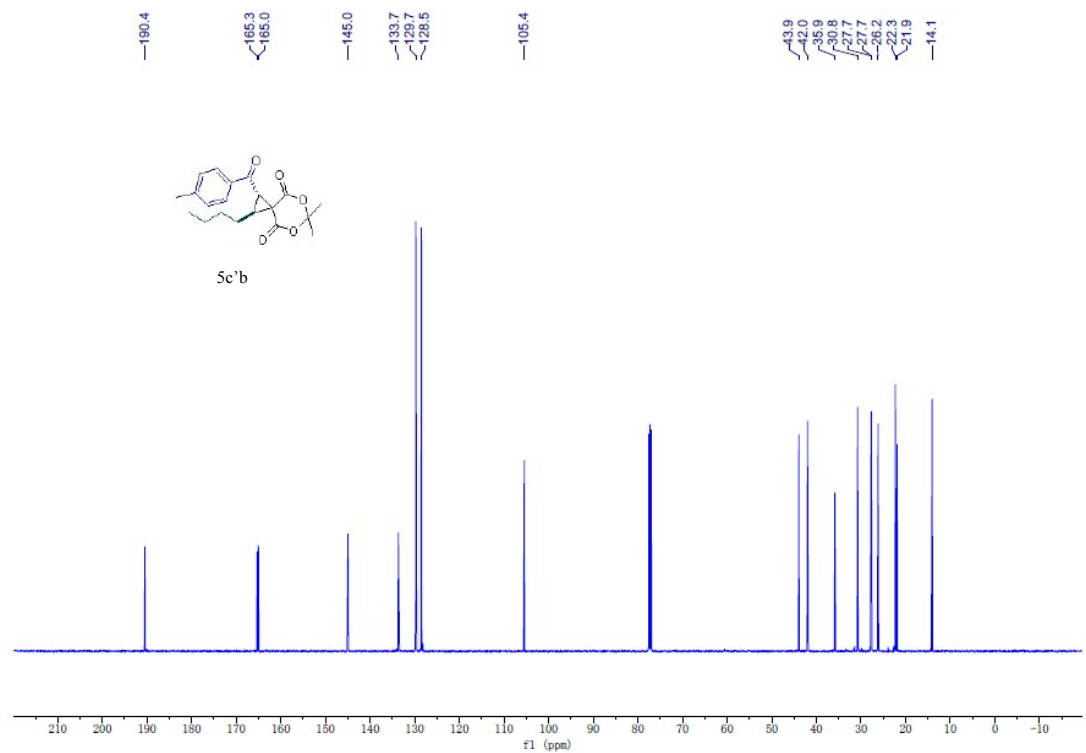

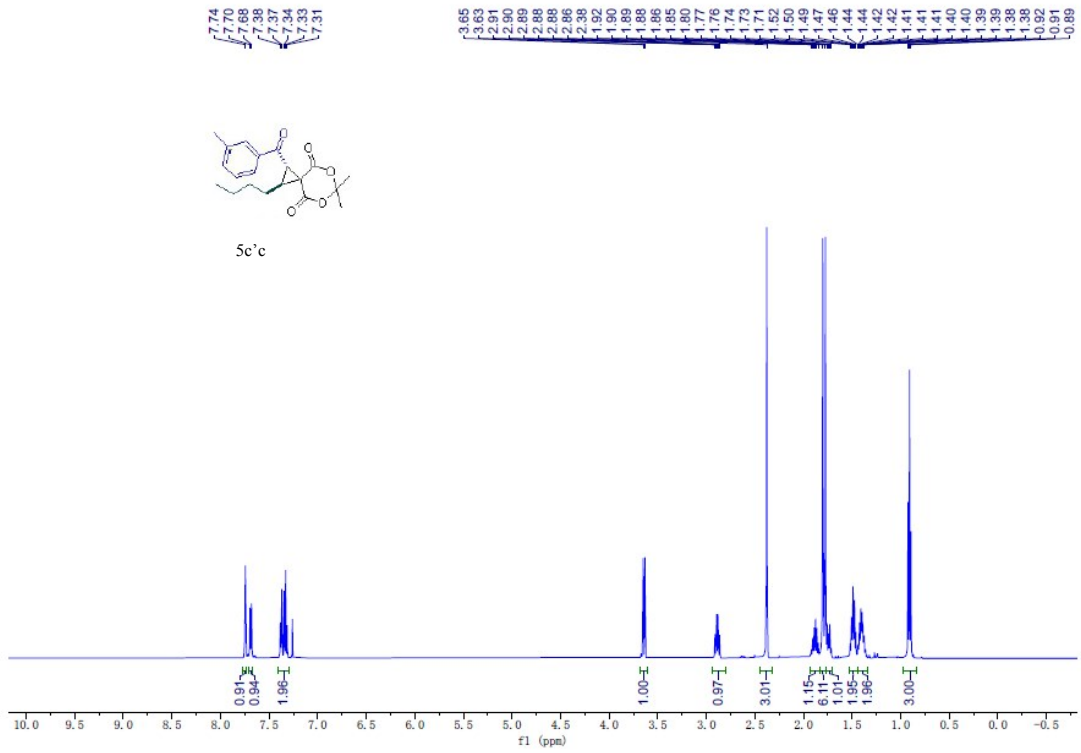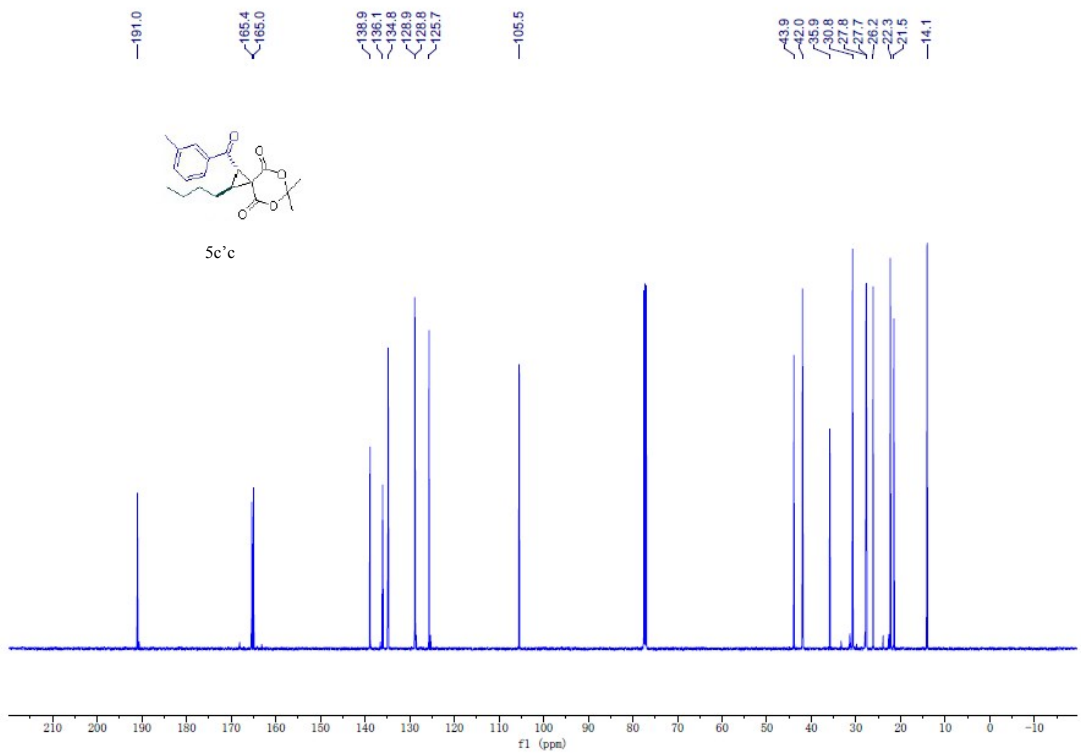

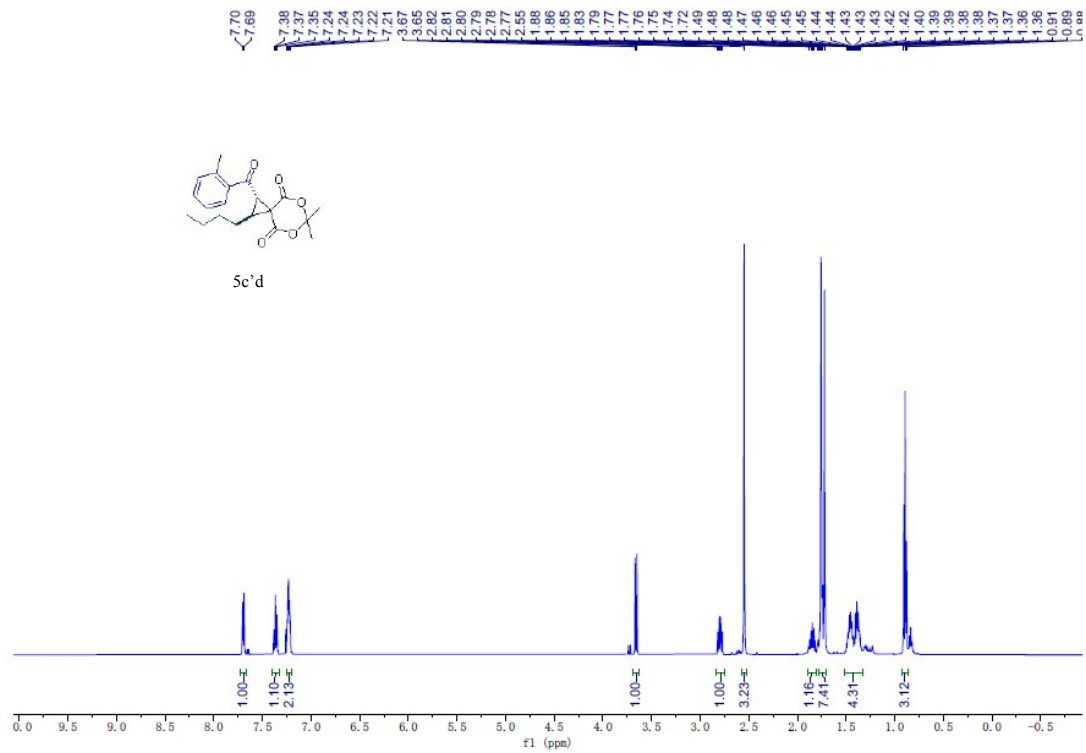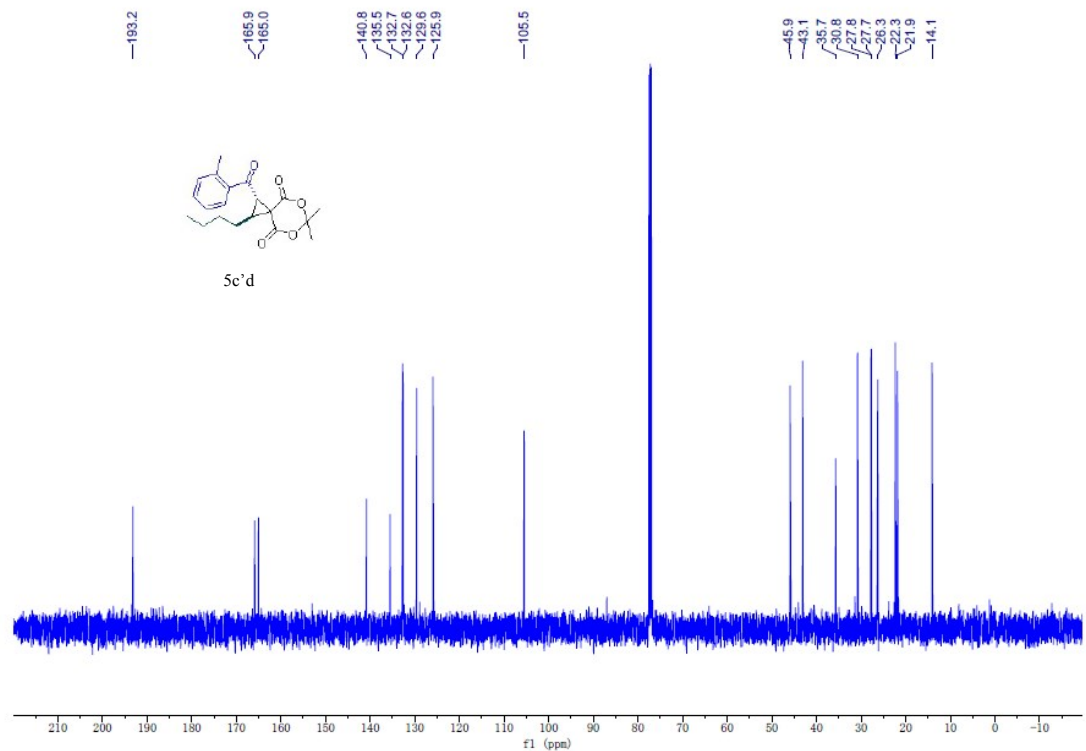

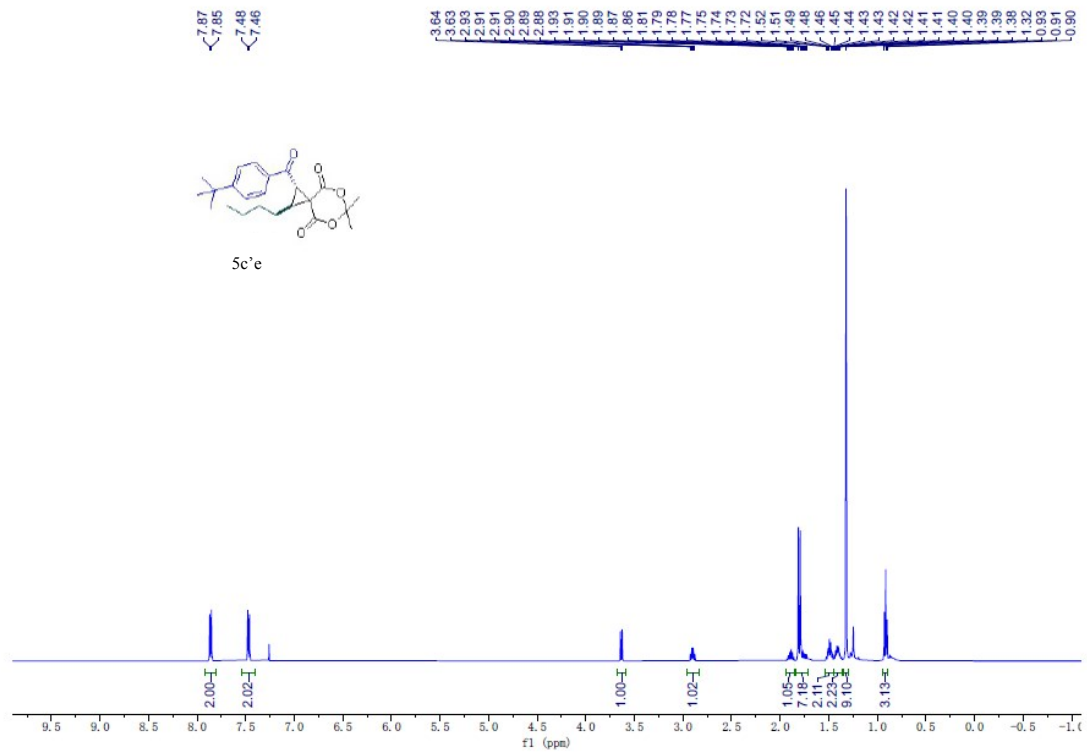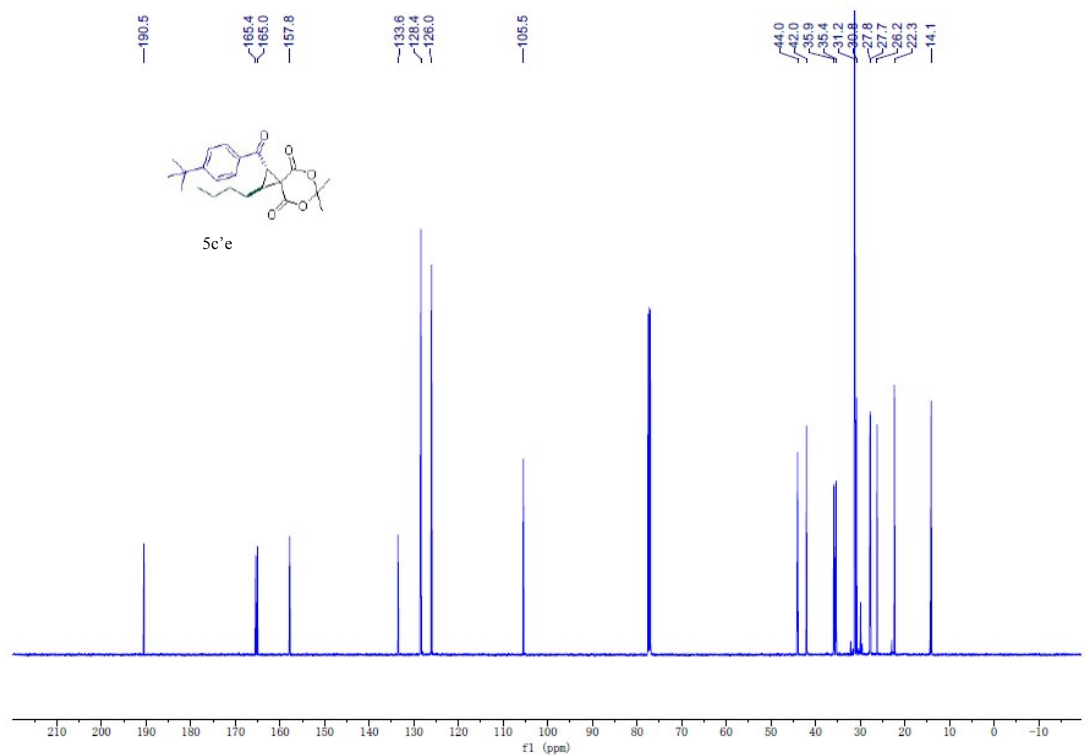





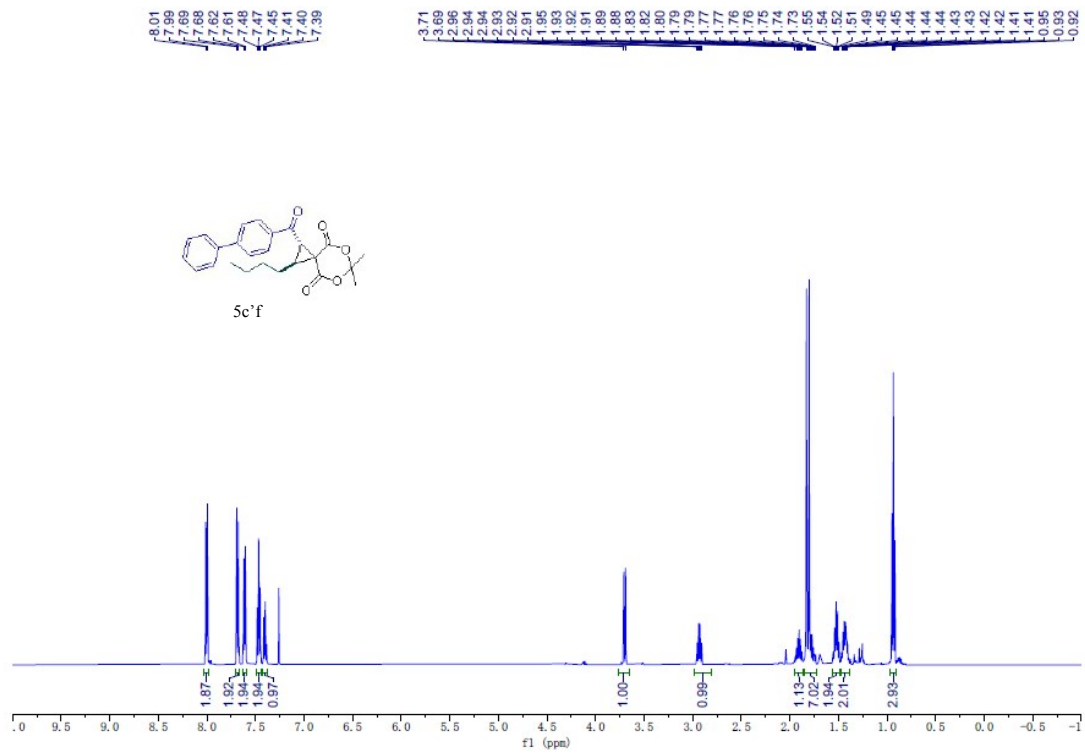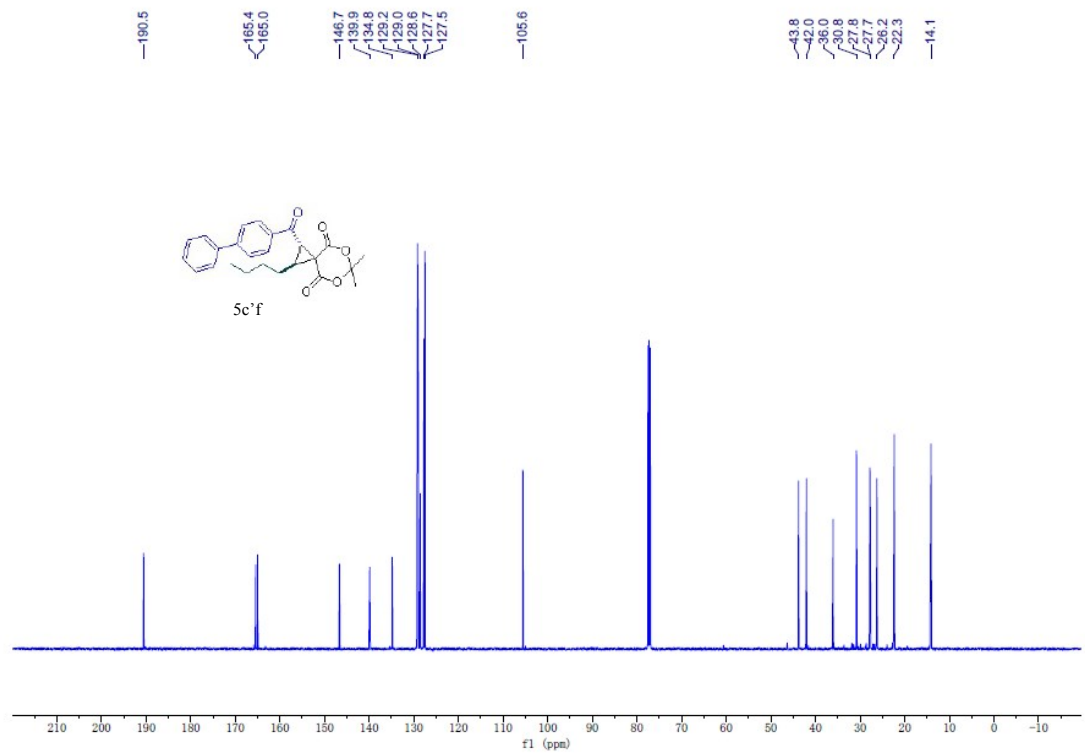

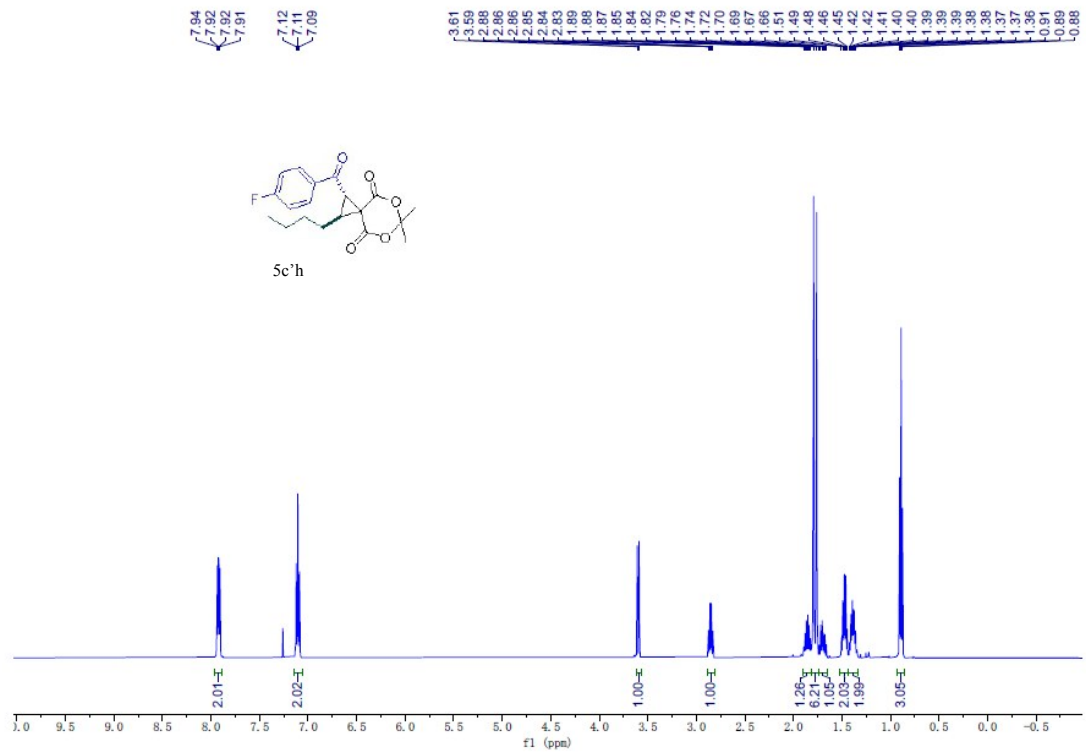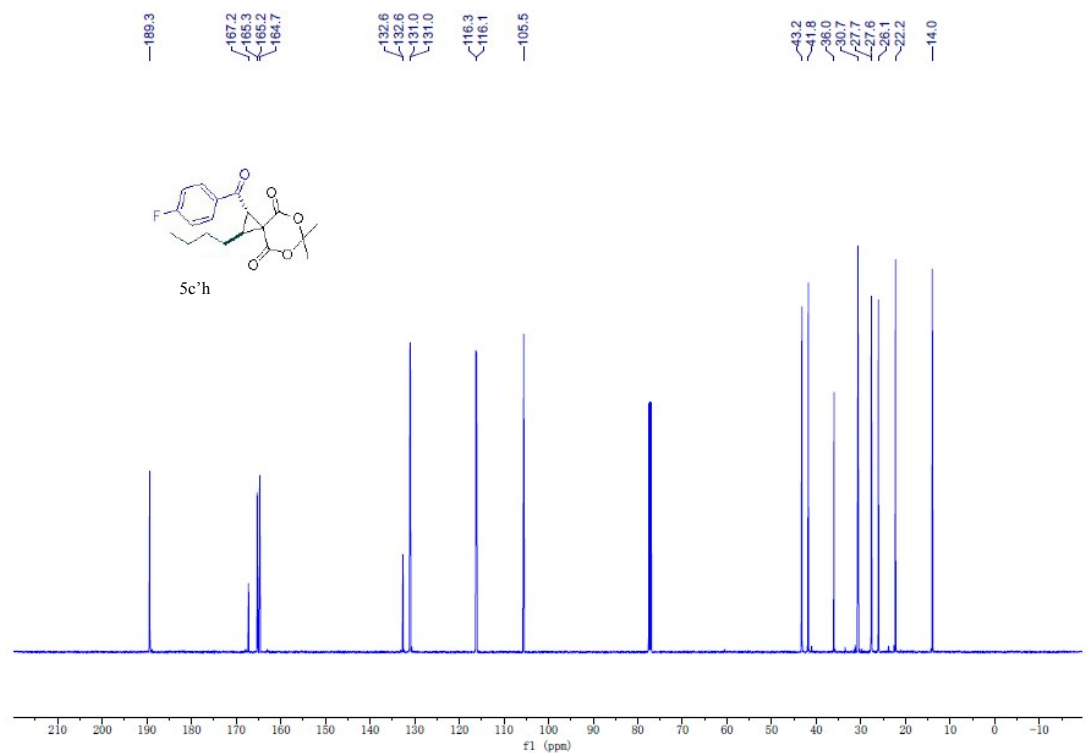

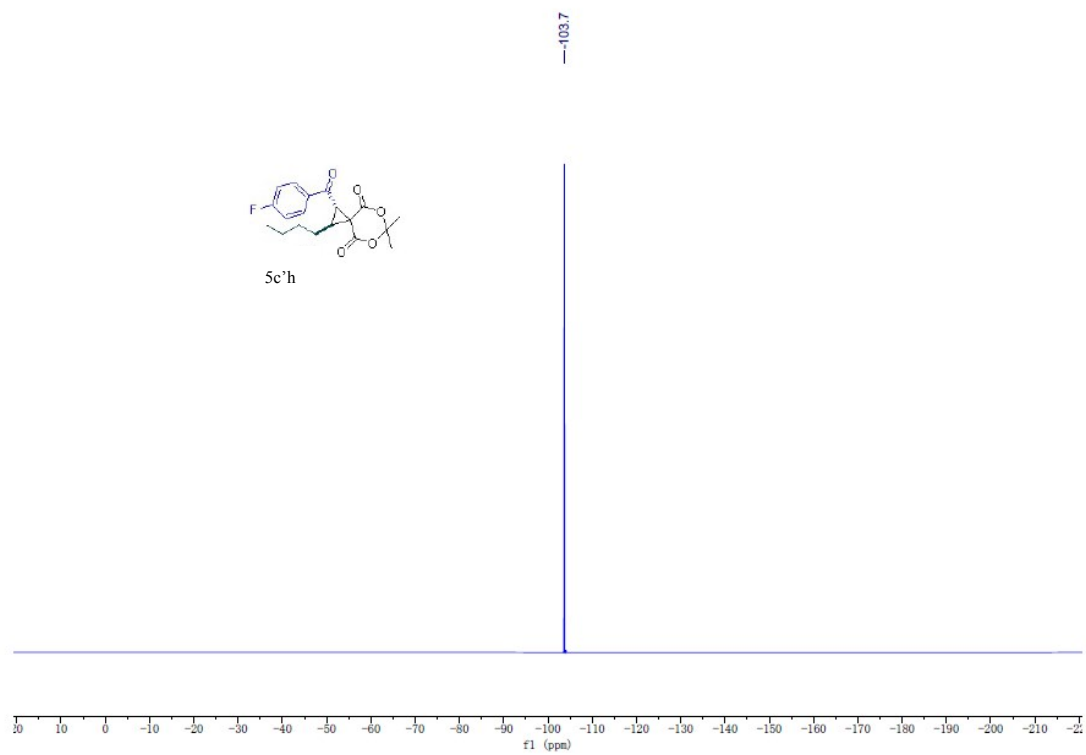



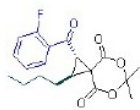

5c'1

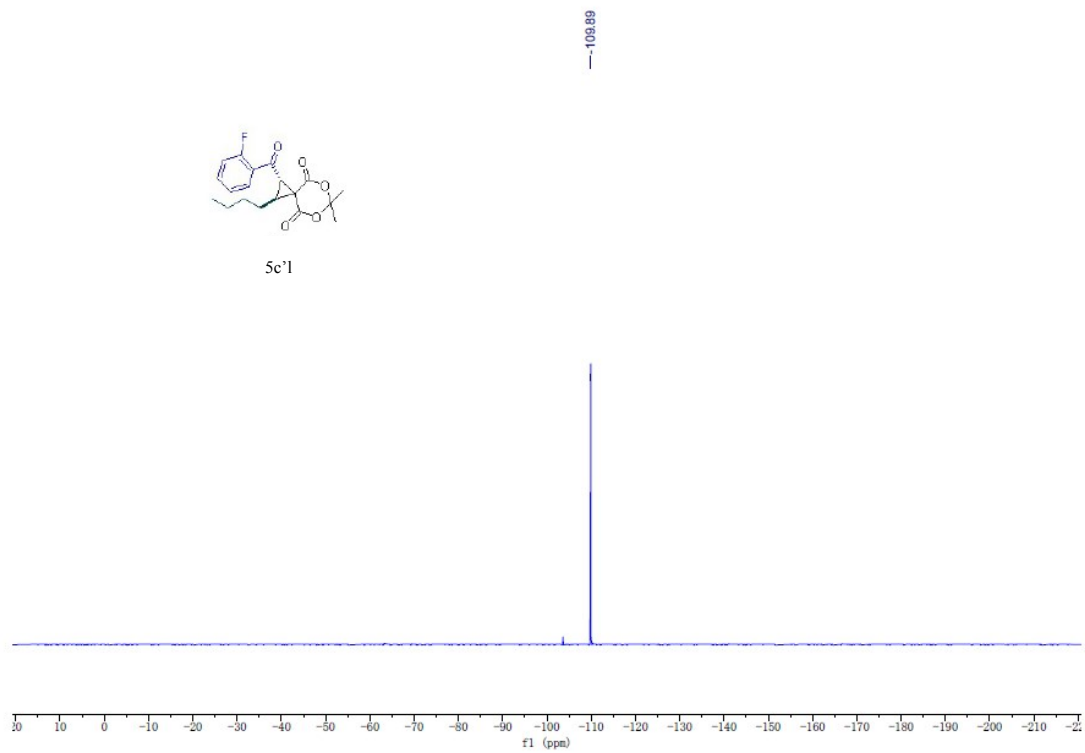

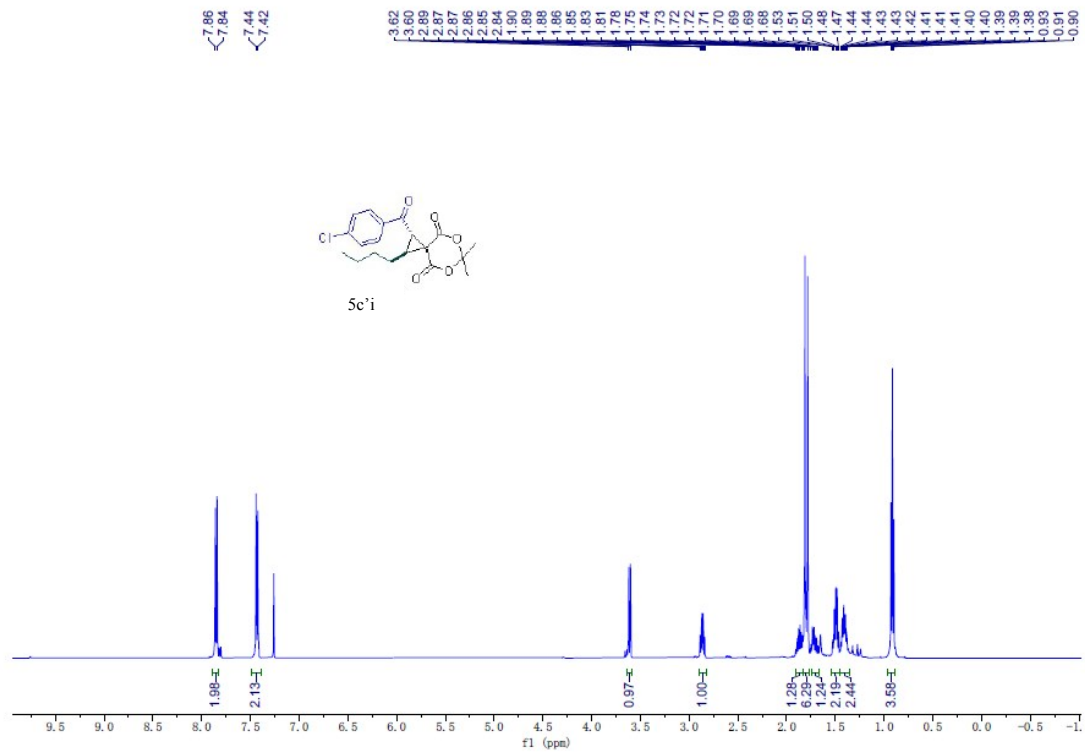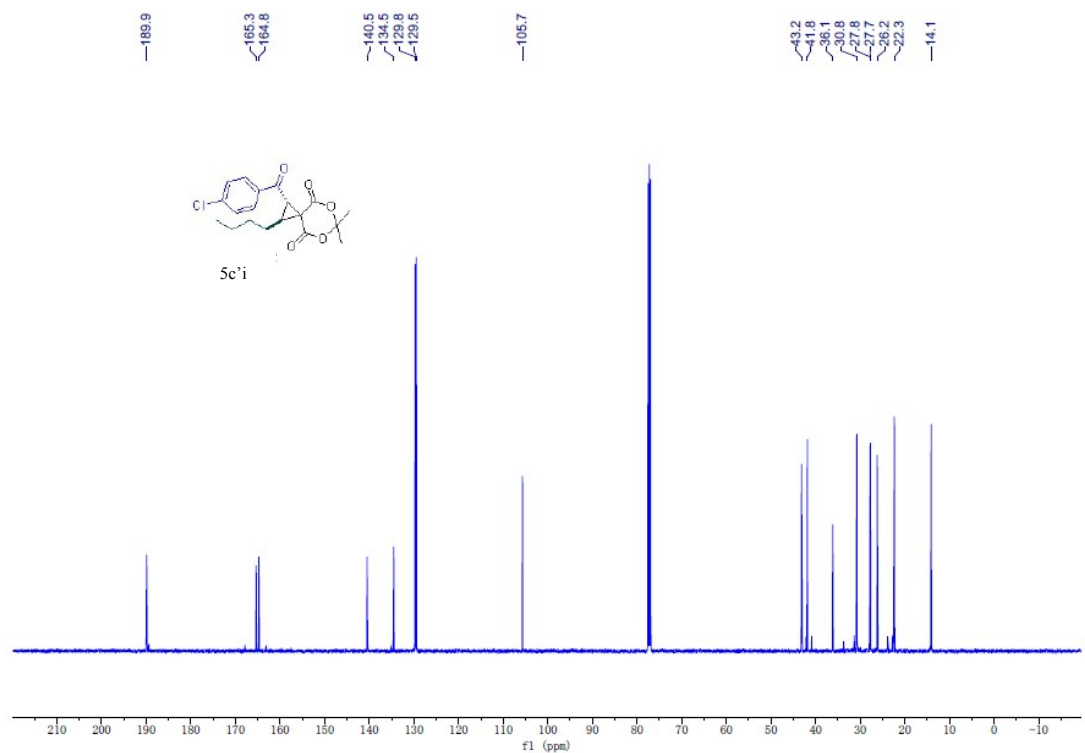

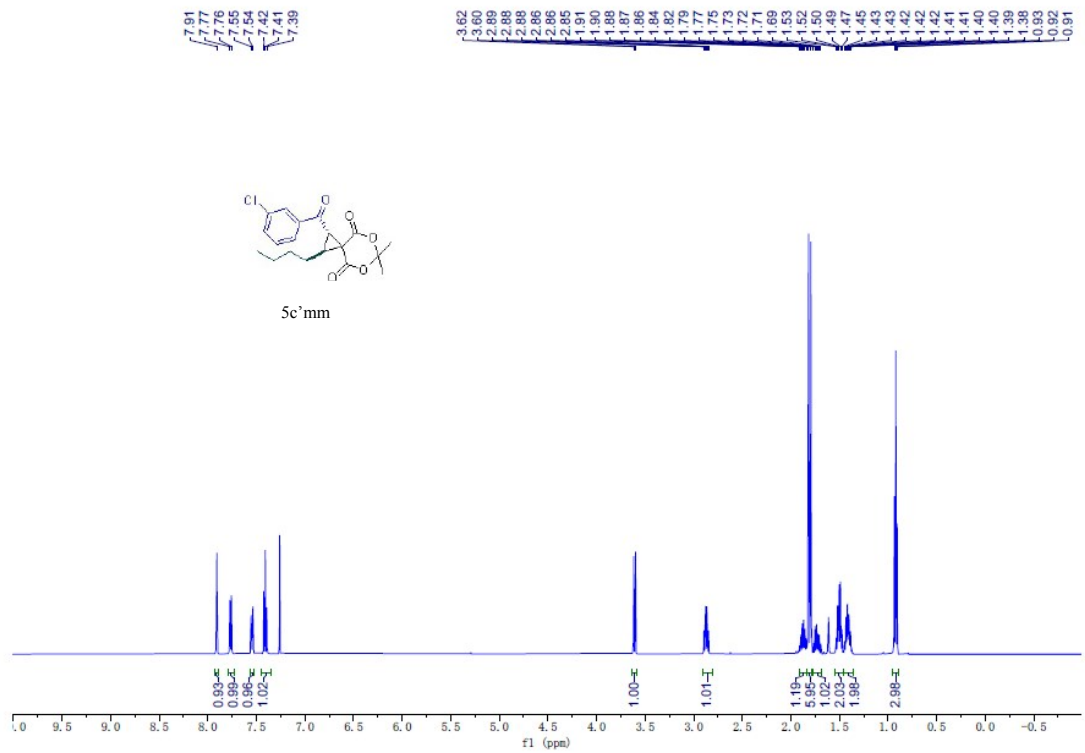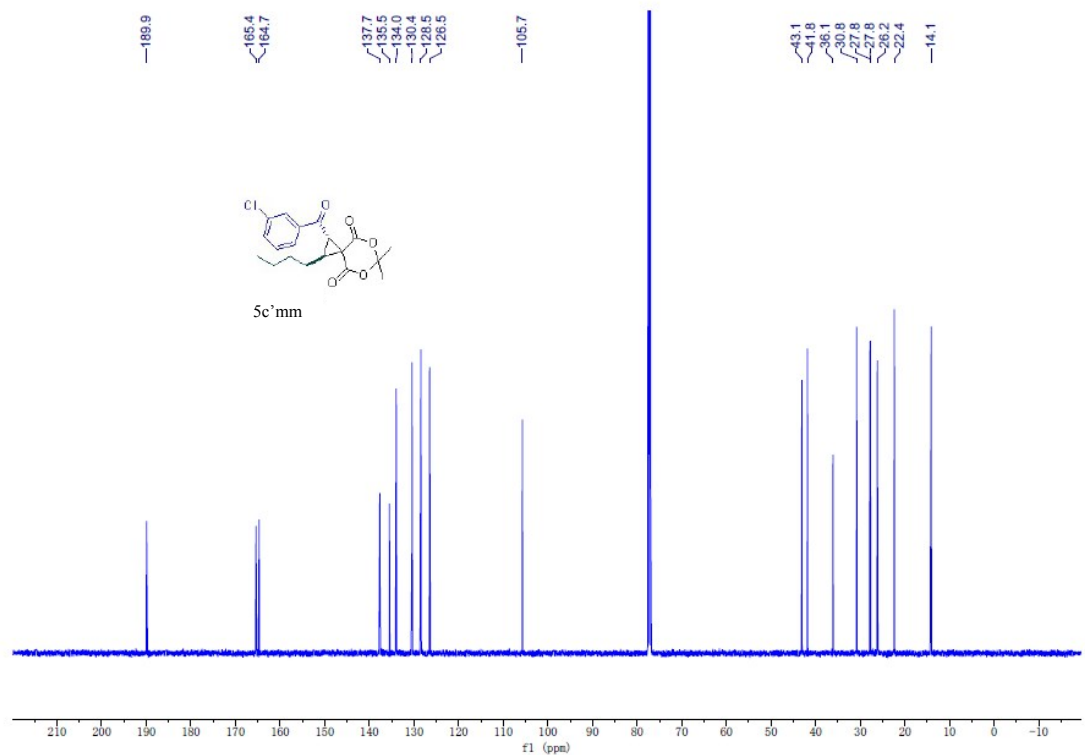





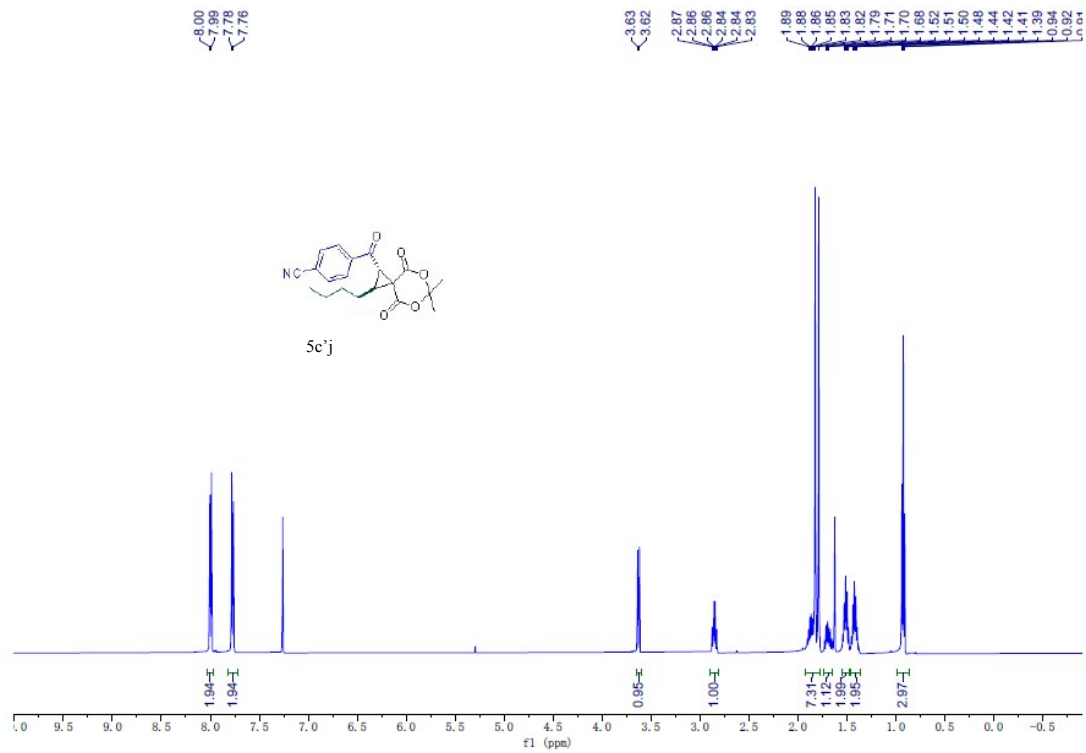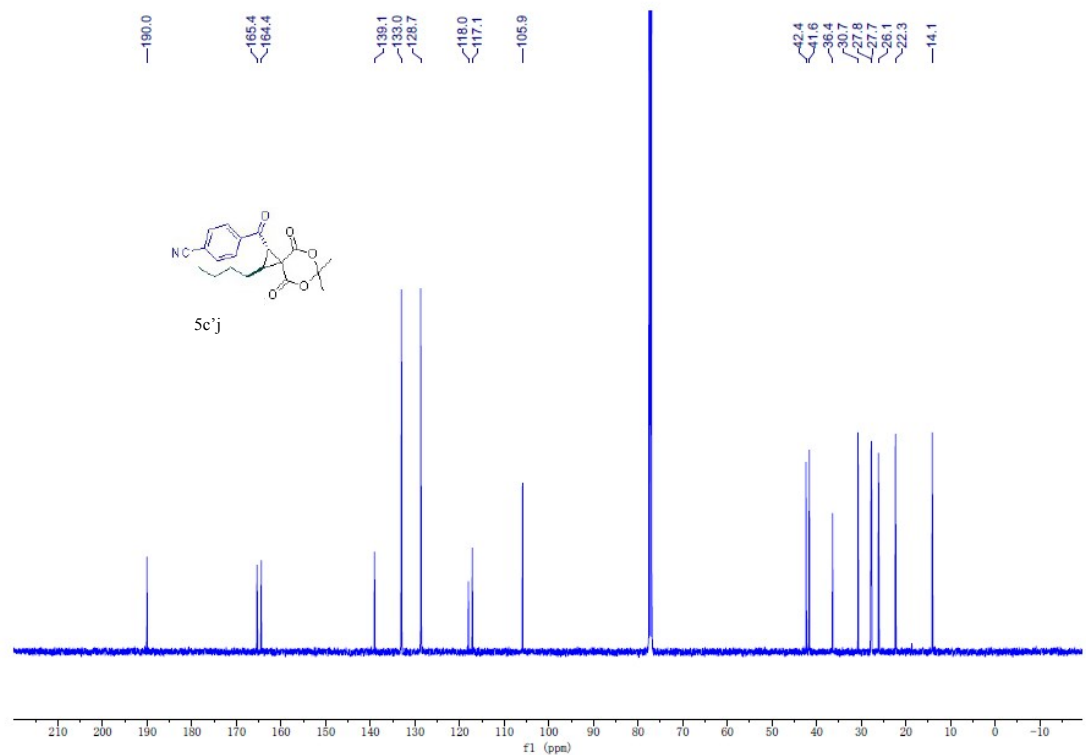



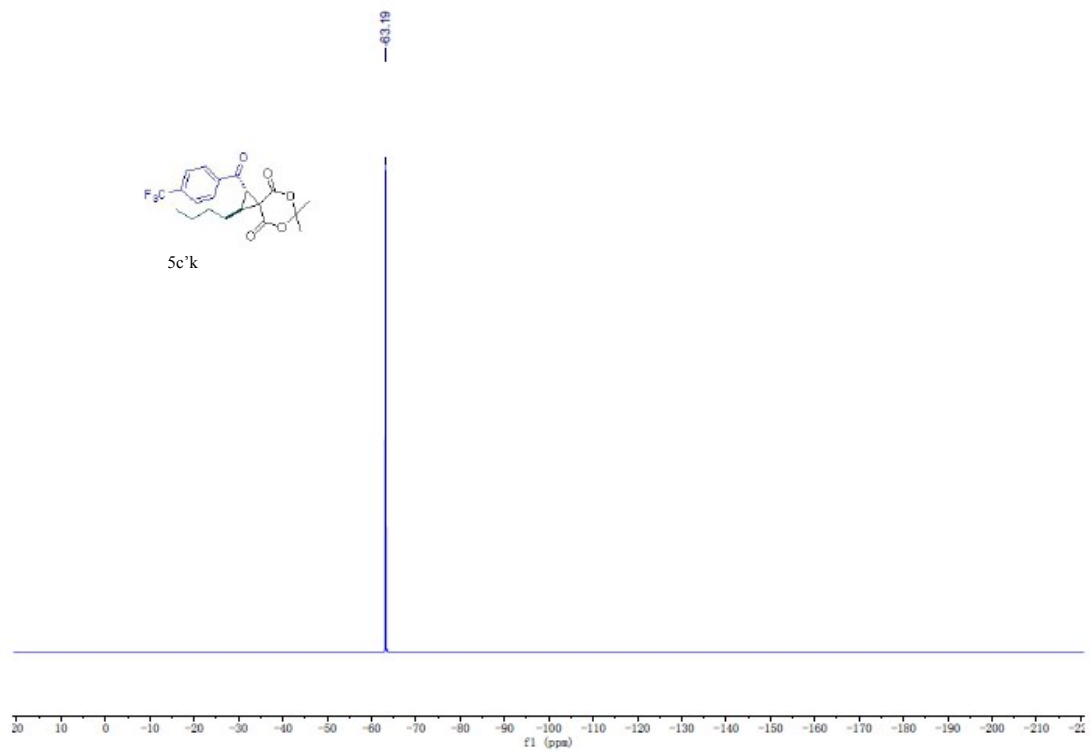

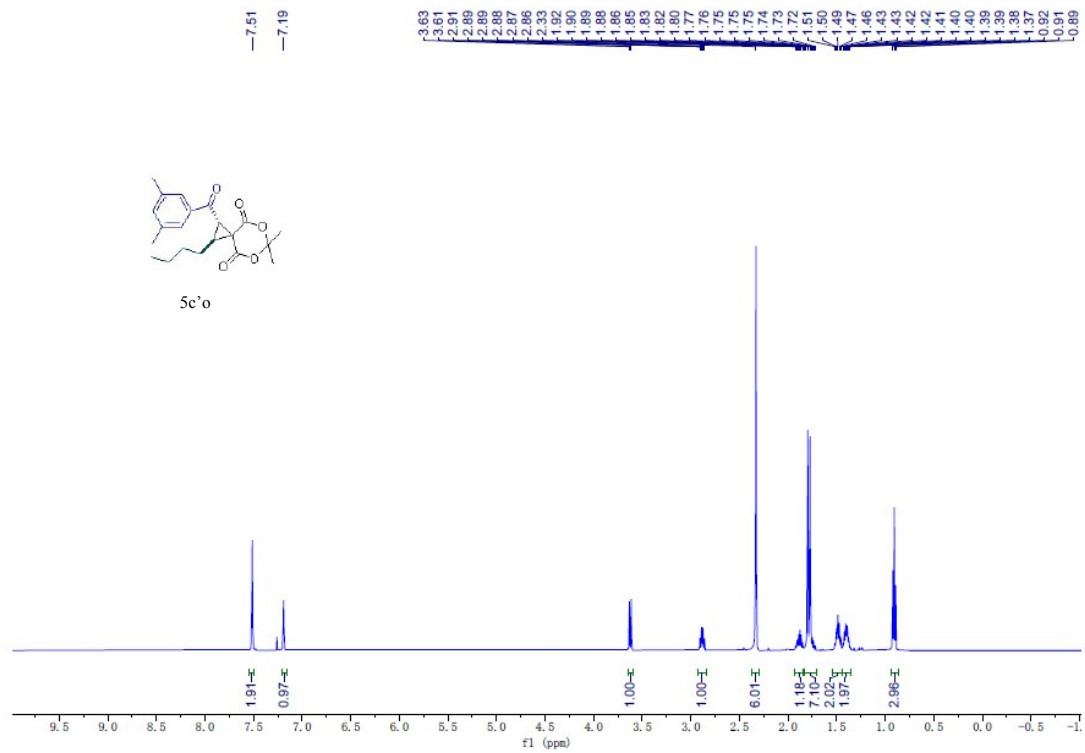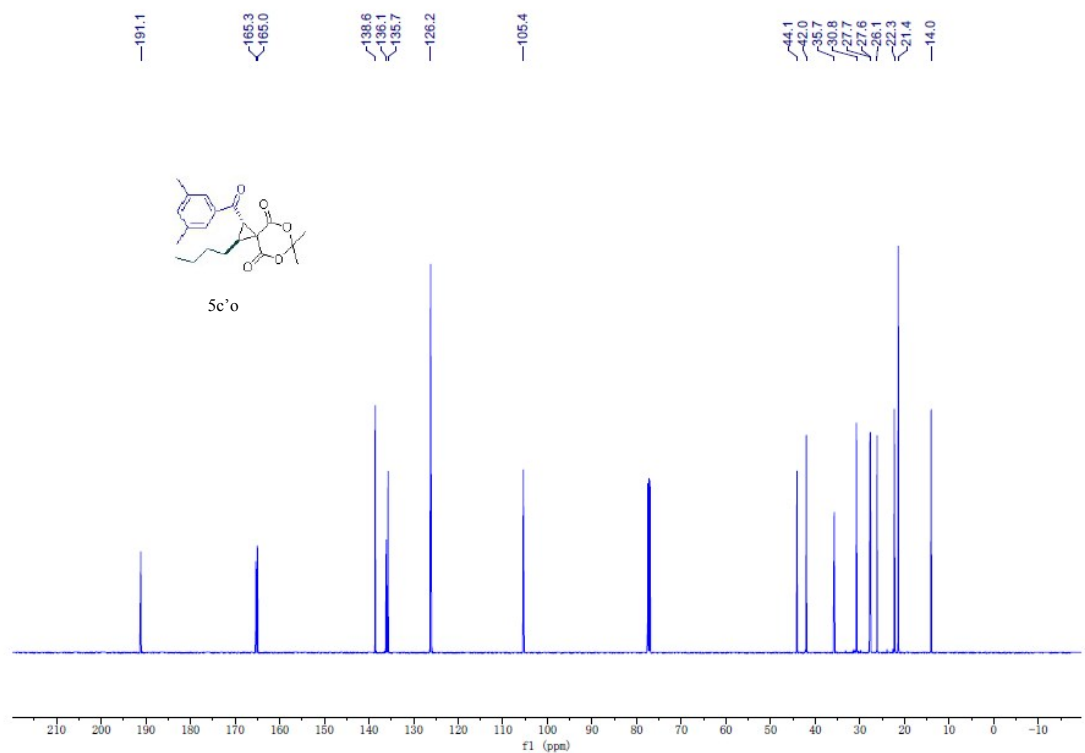

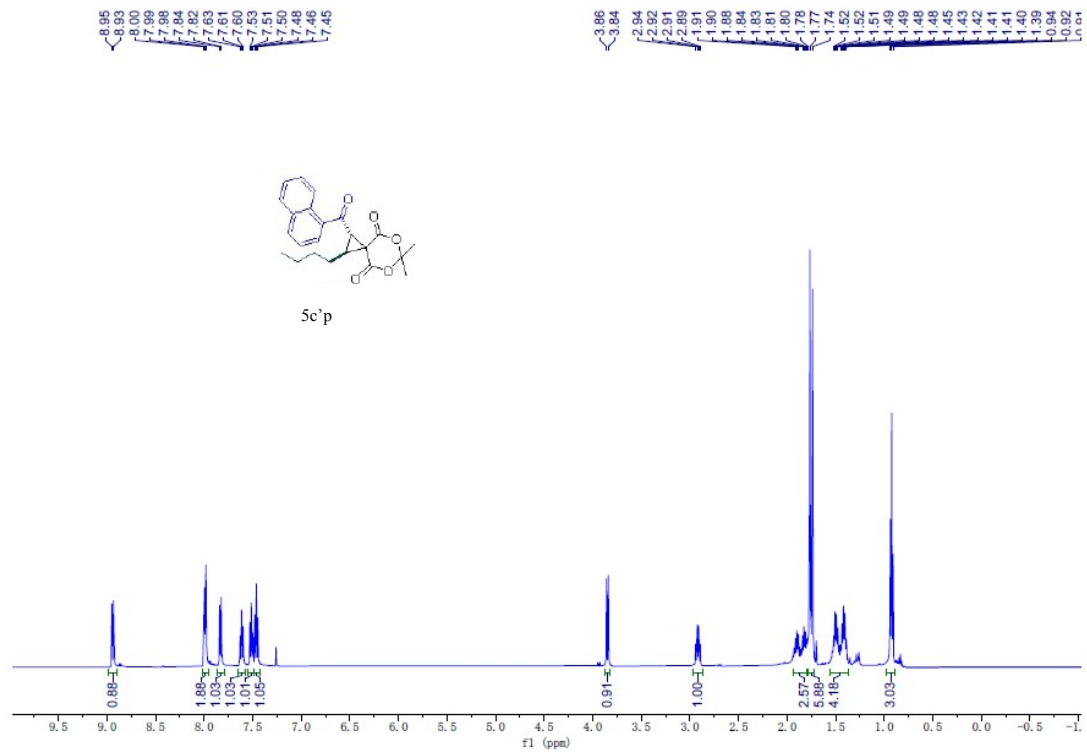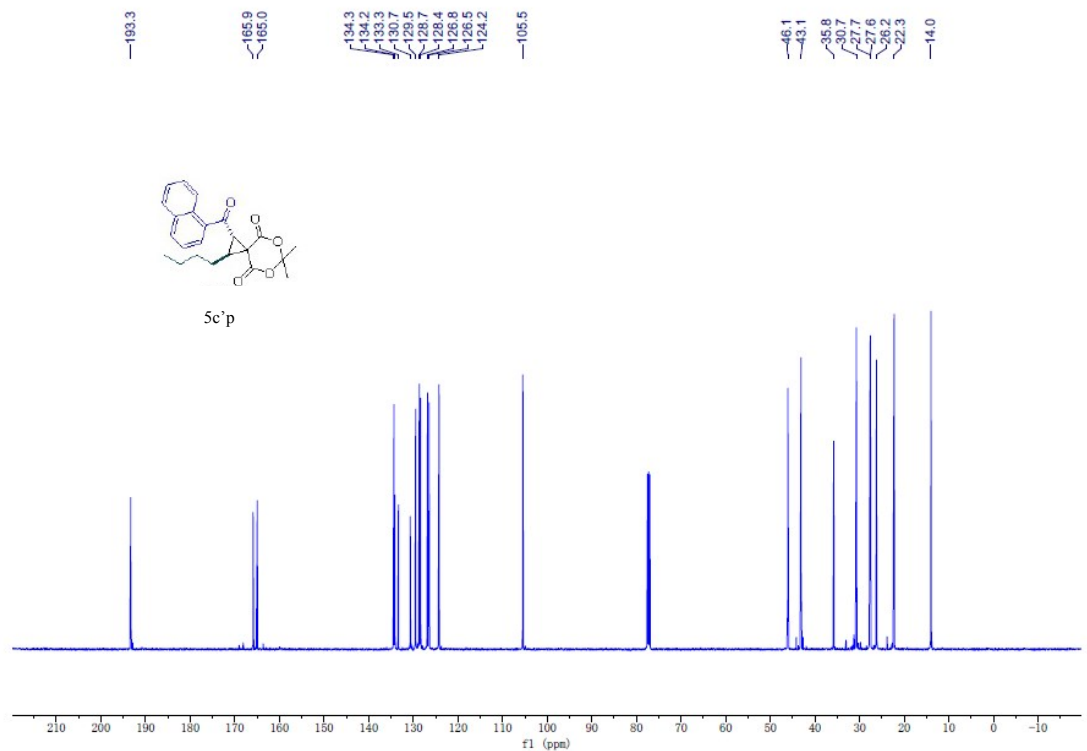



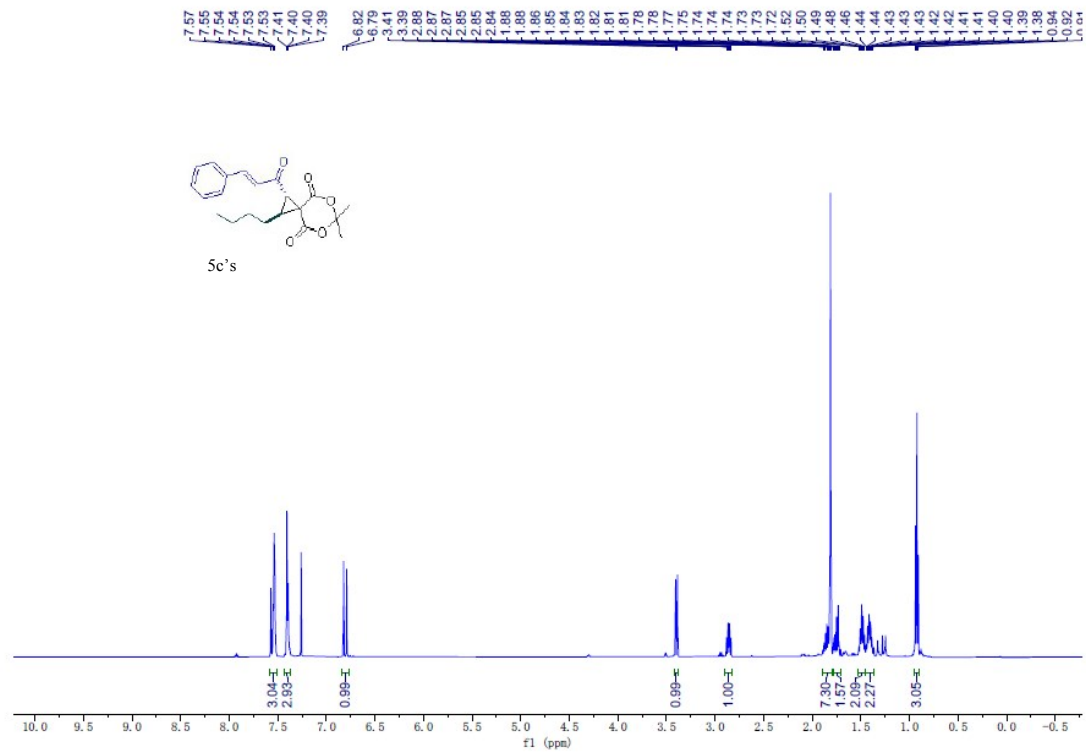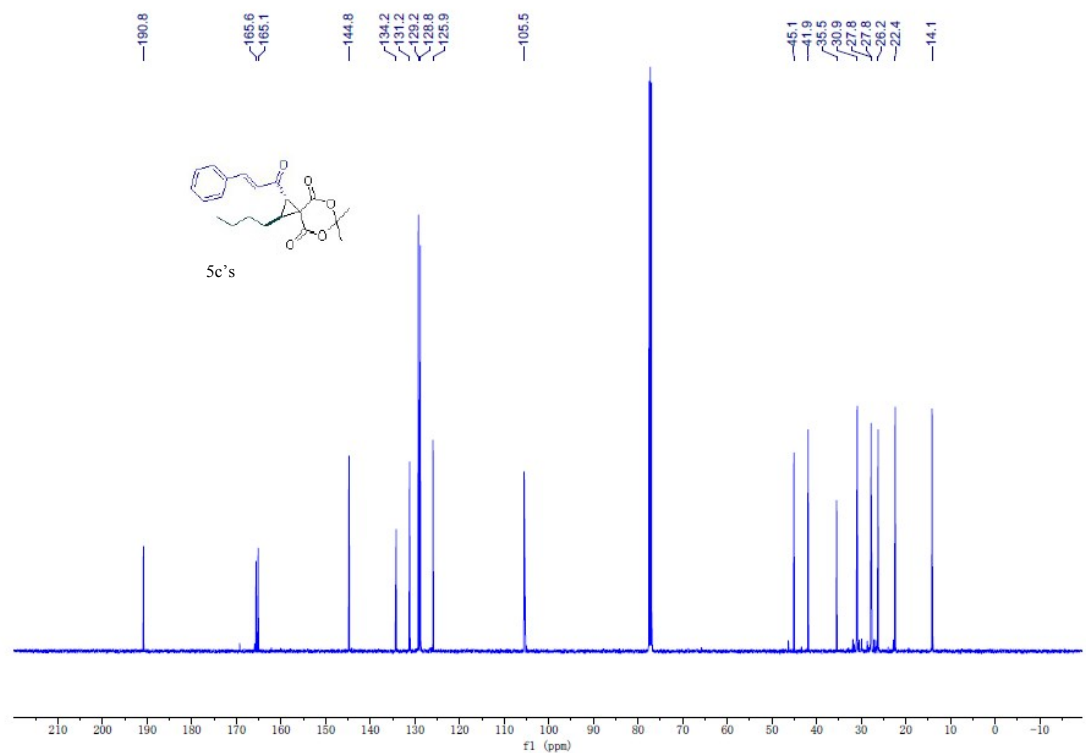

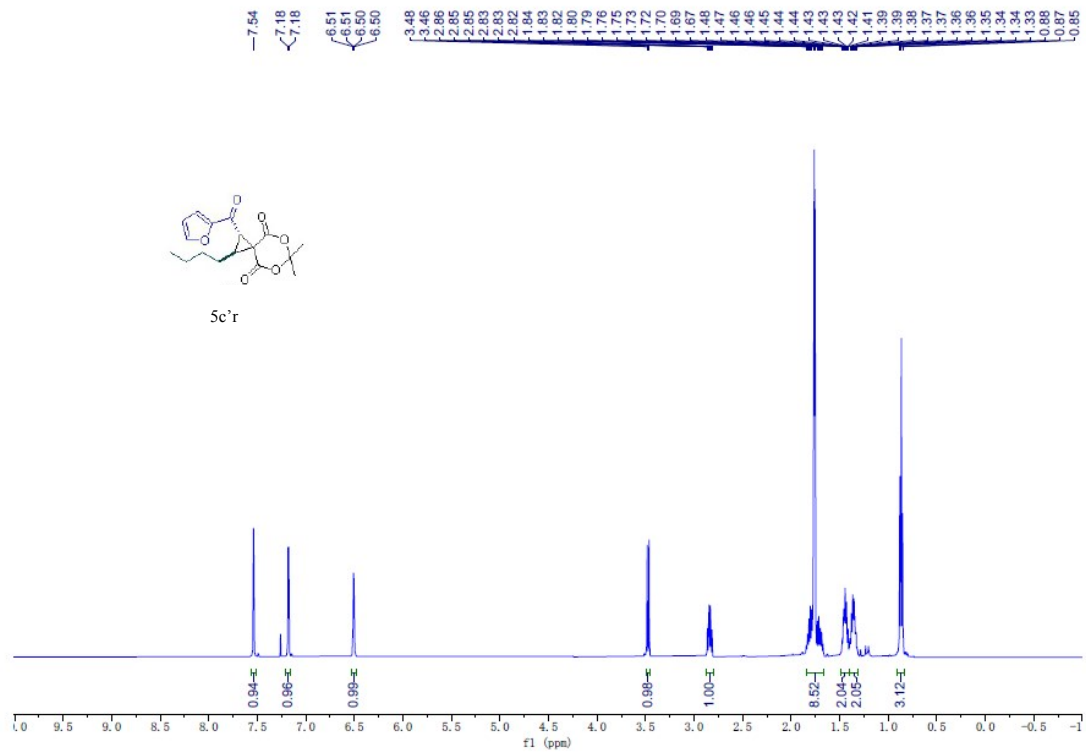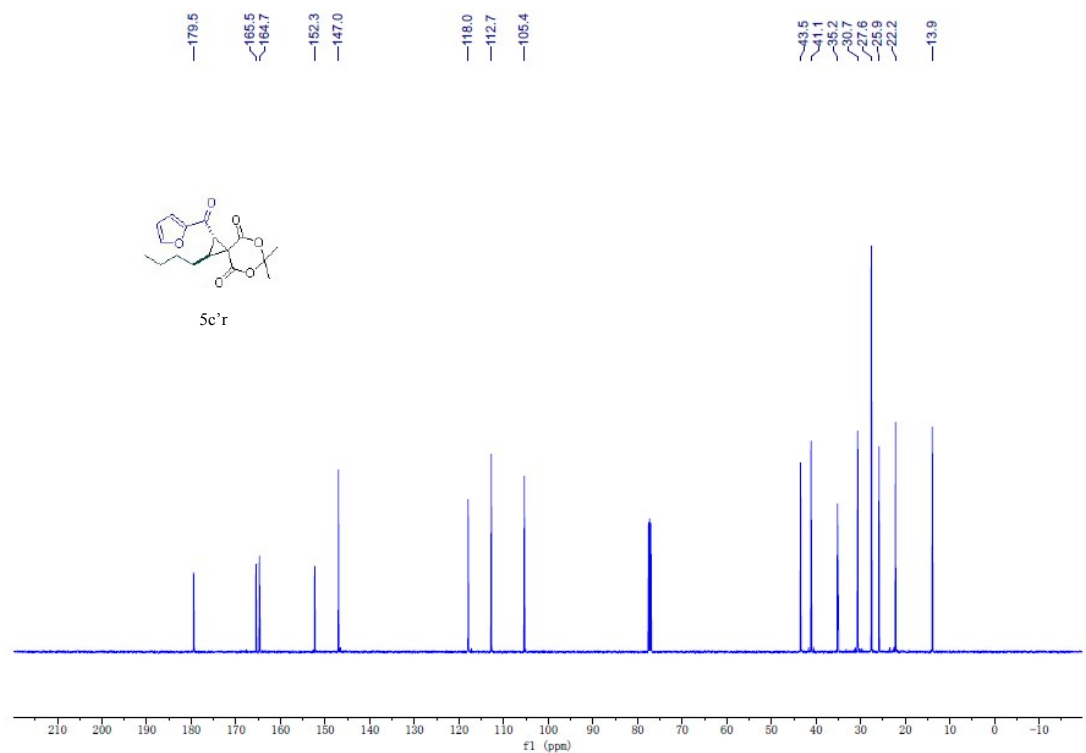



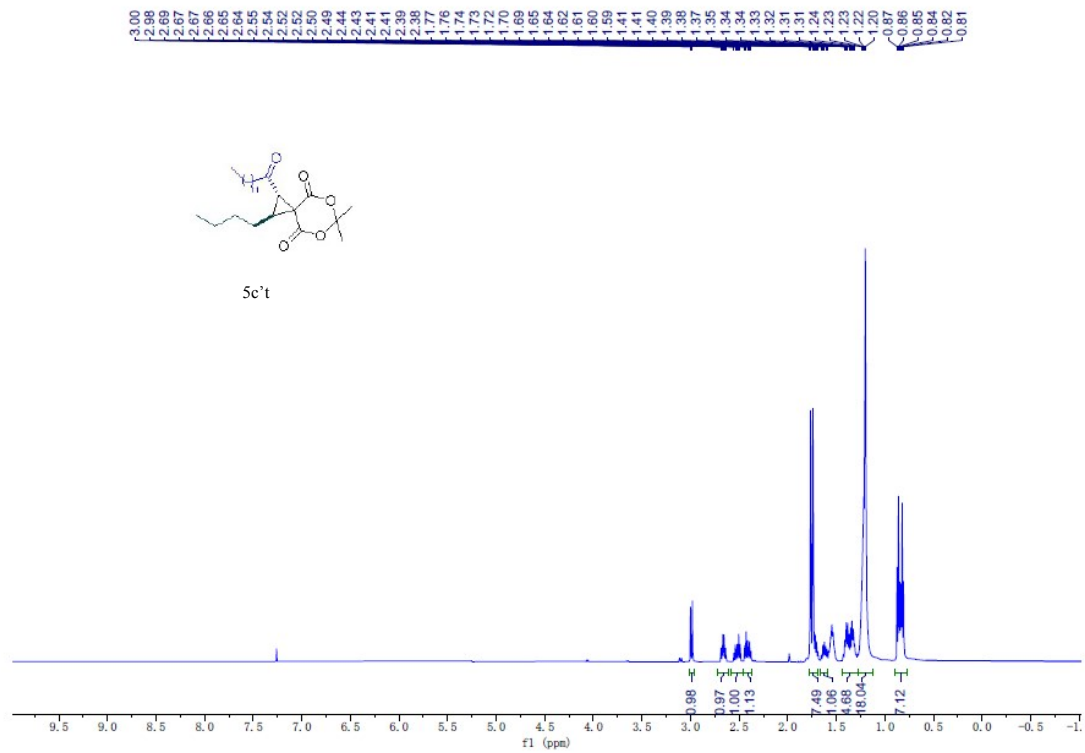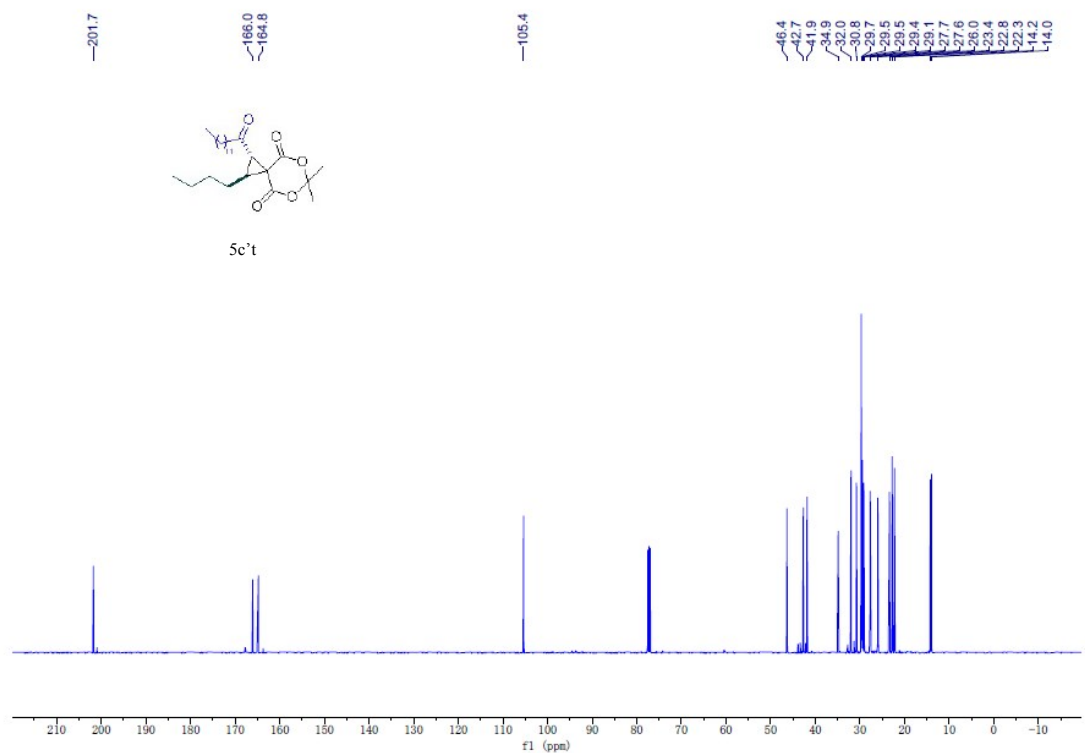

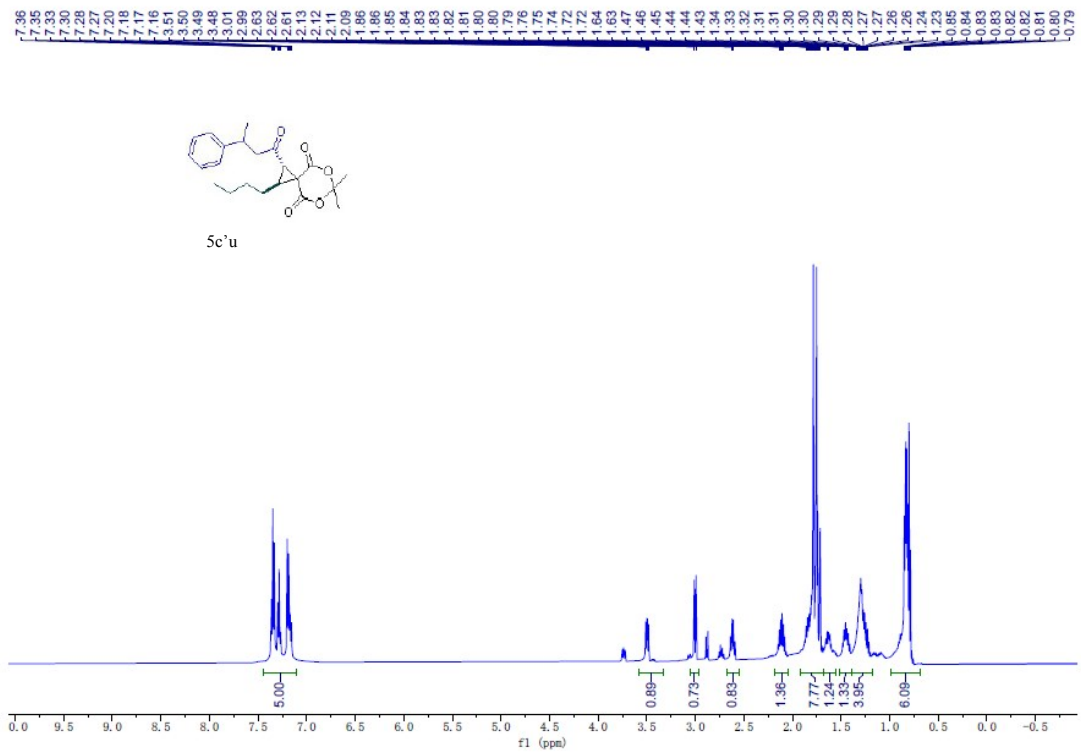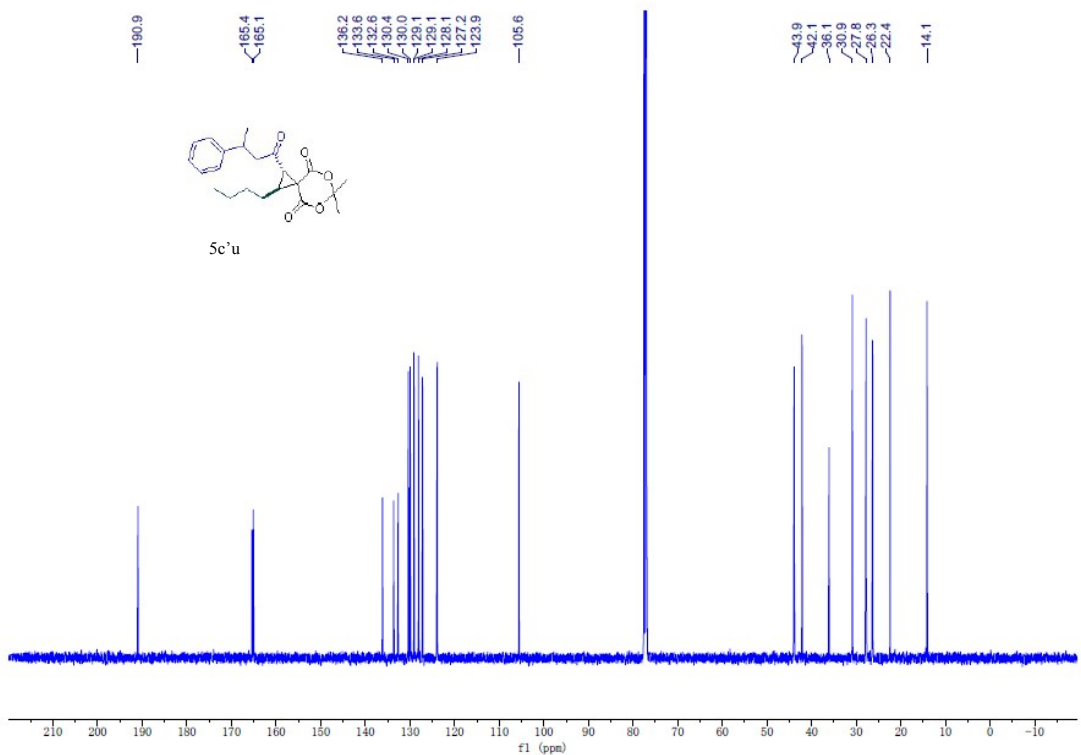

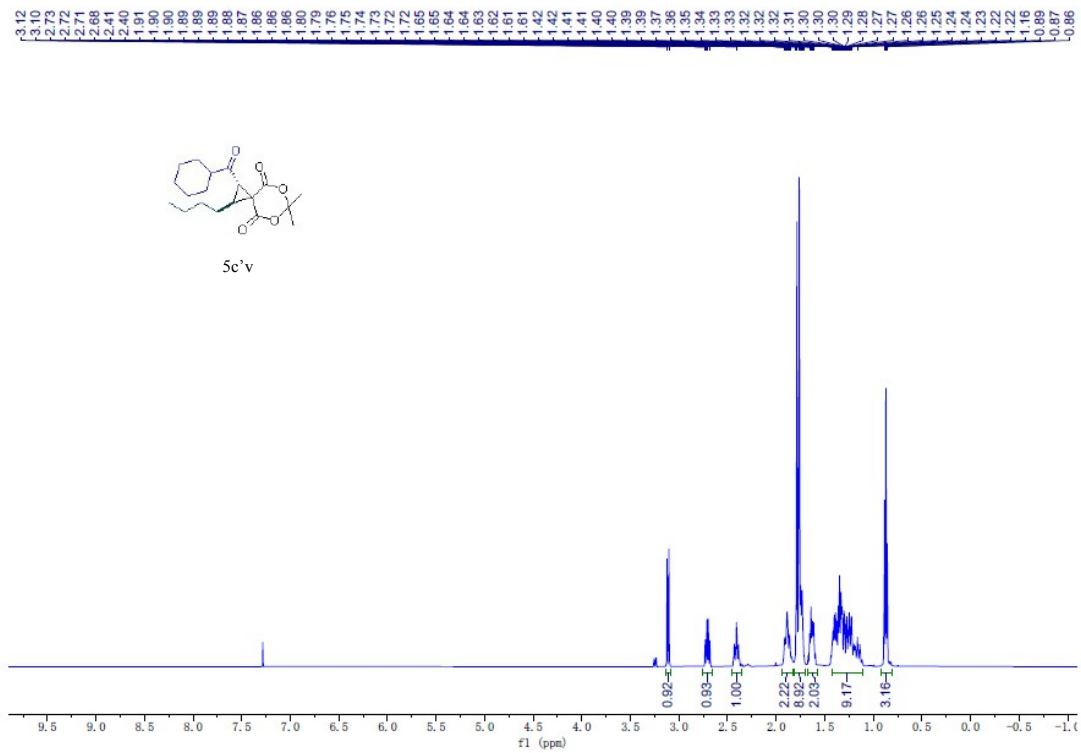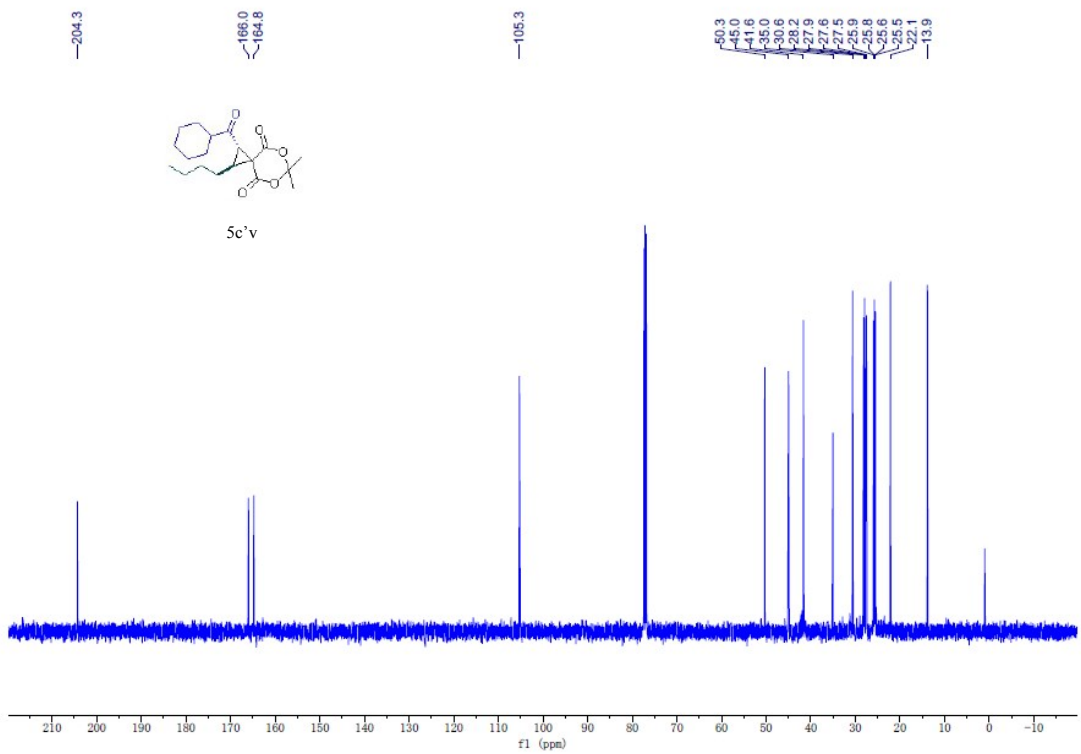

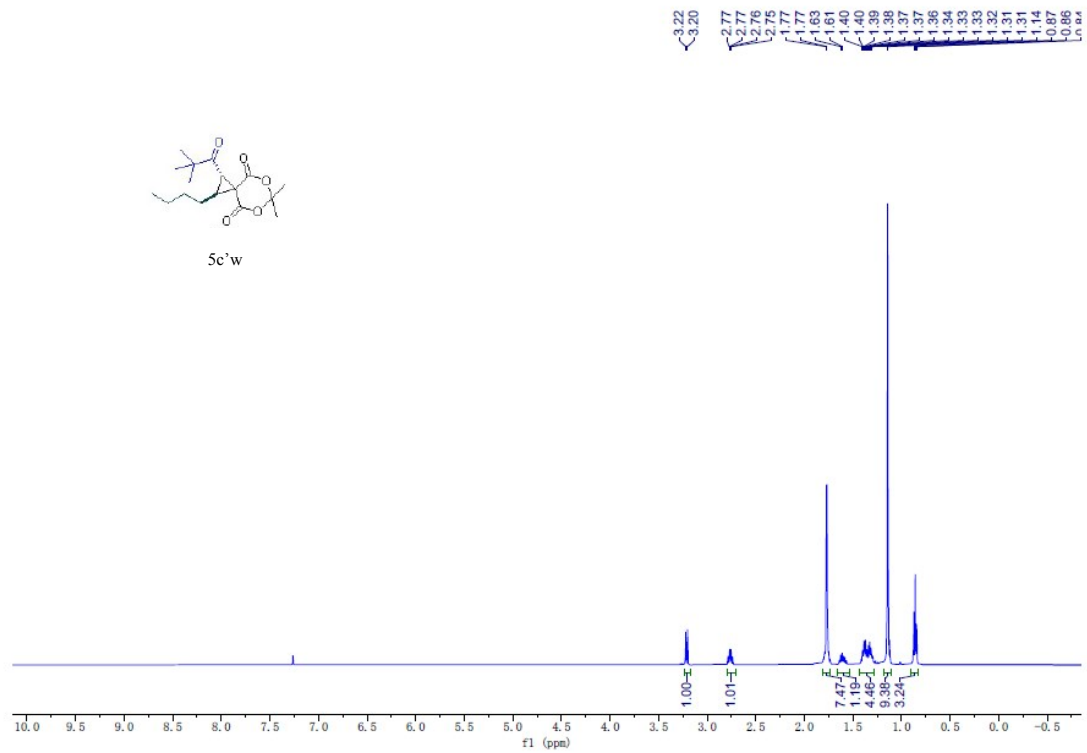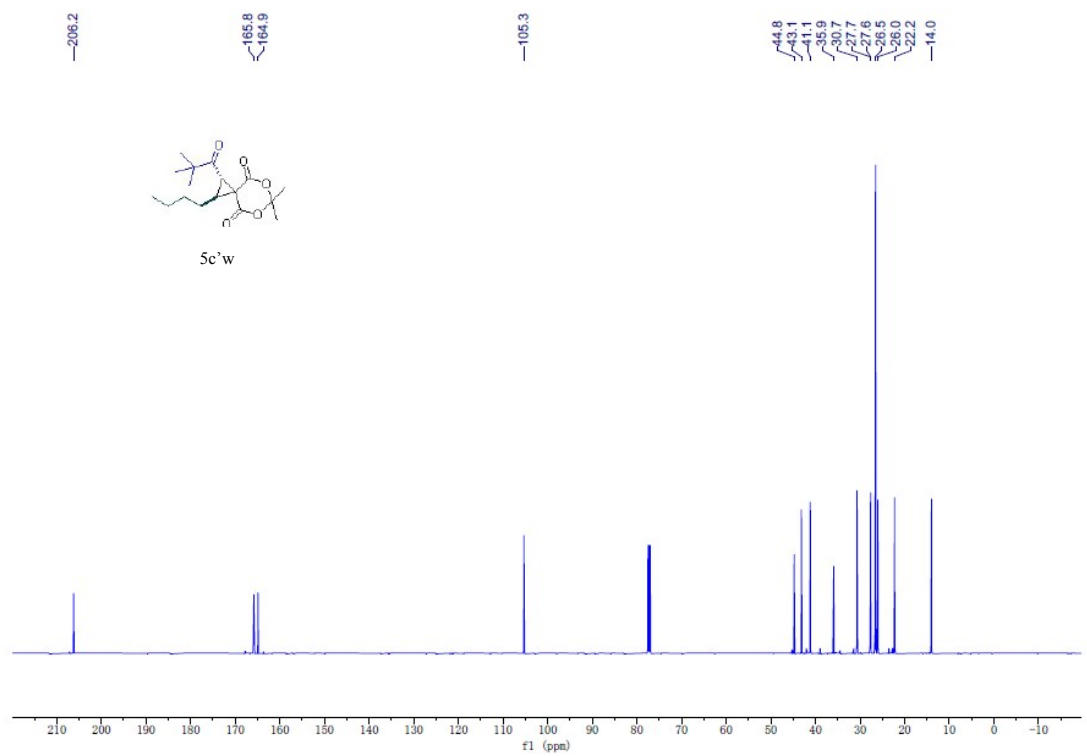

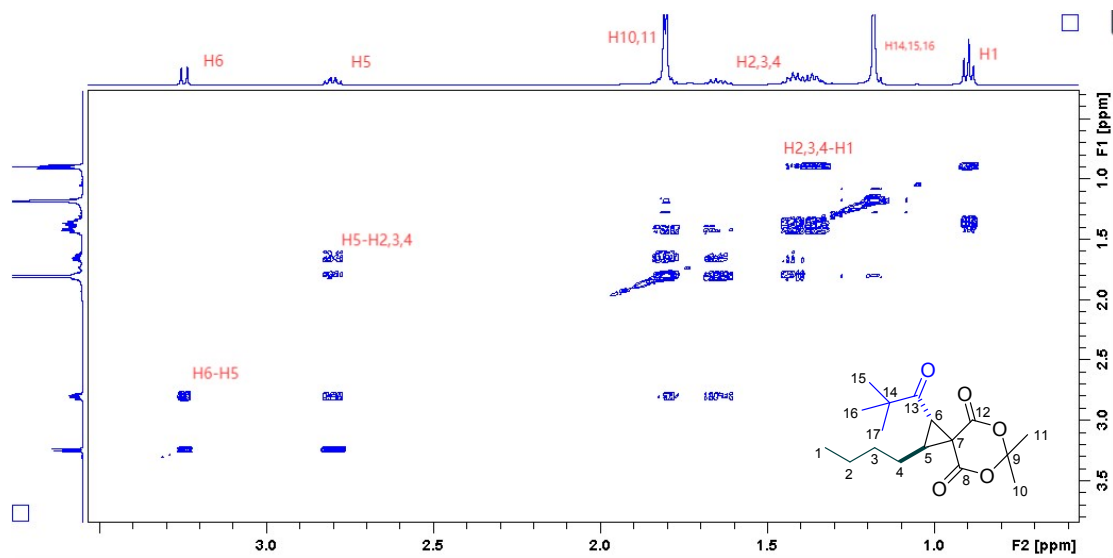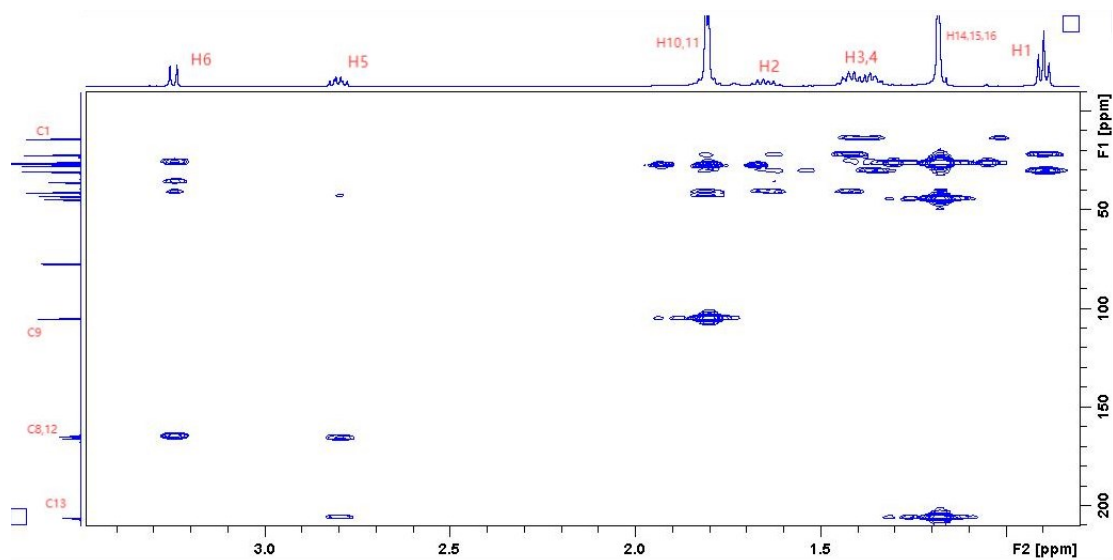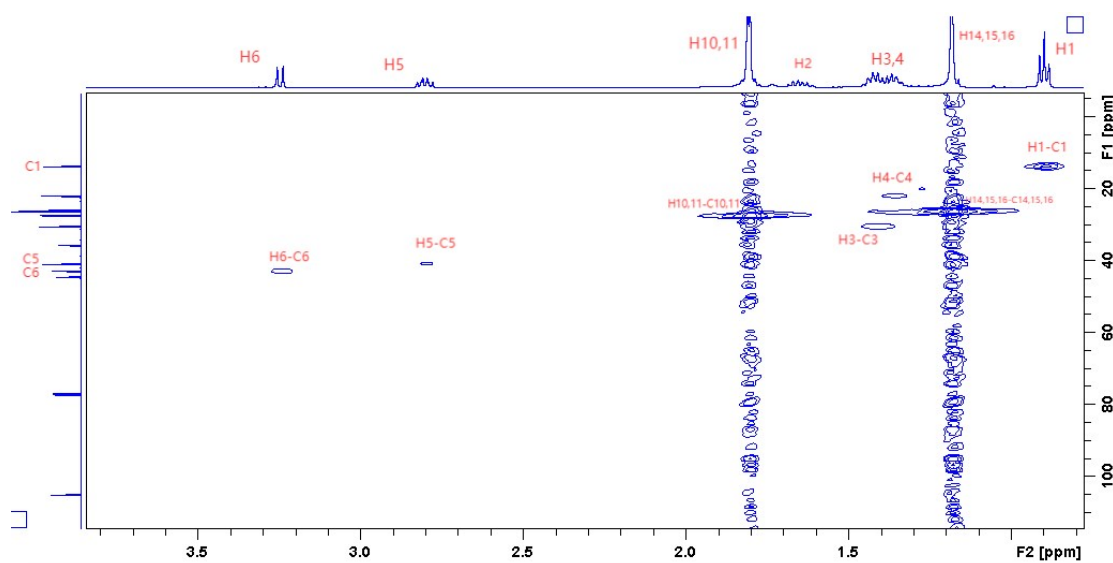



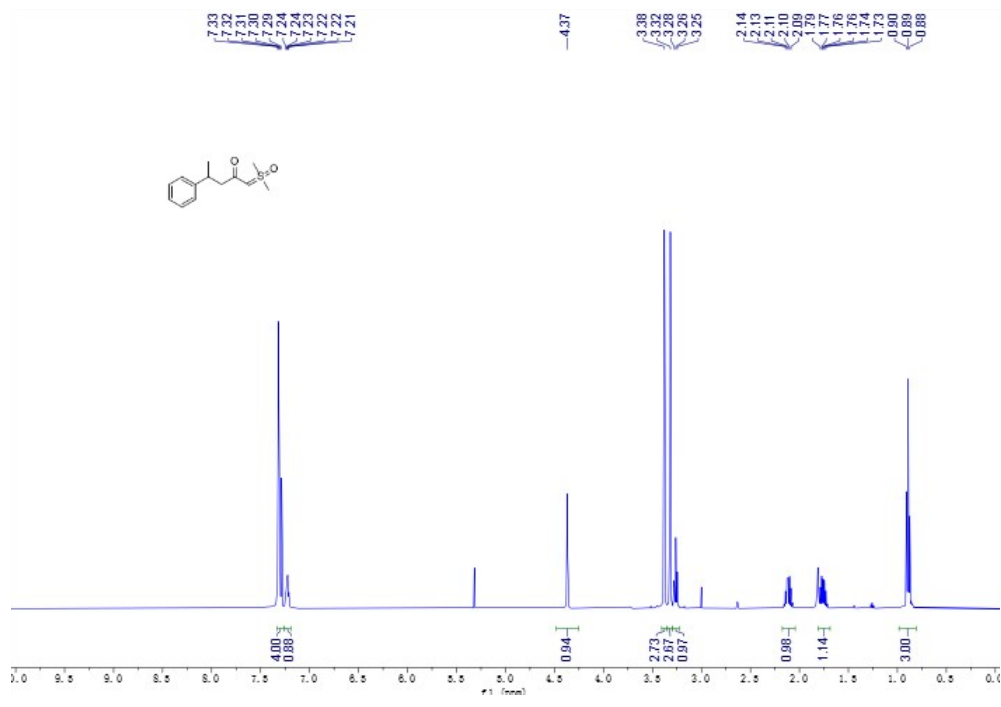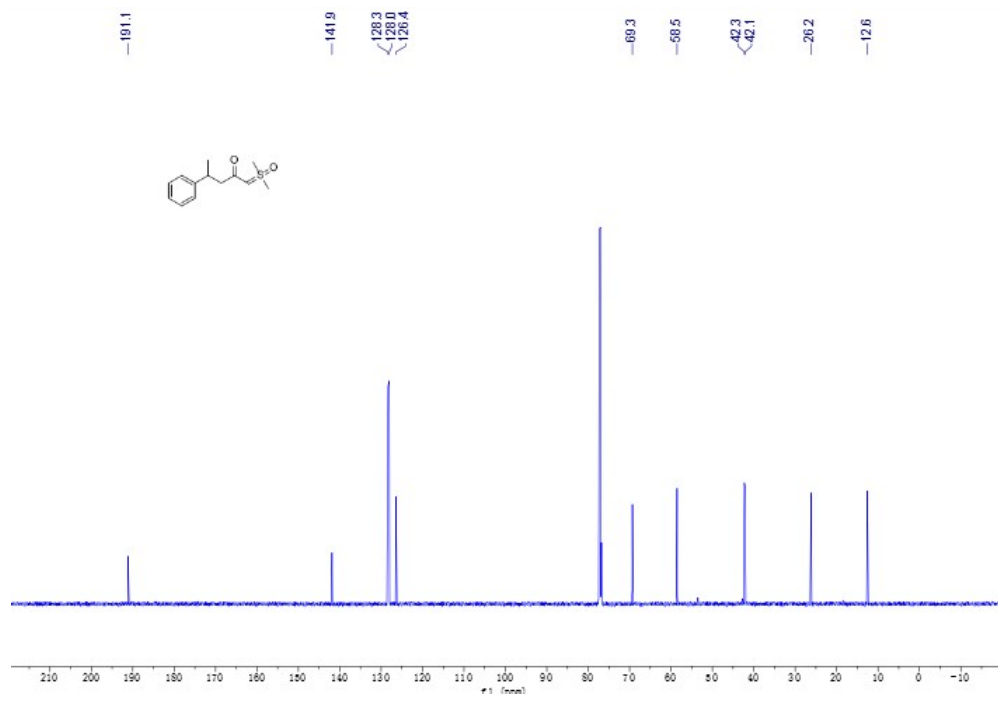

Supplement: d1qo00303h1.pdf [file d1qo00303h1.pdf]
